# Supplementary material for: Development of Novel Bacterial Topoisomerase Inhibitors Assisted by Computational Screening
Source: PubMed Central journal article supplement — ACS Med Chem Lett. 2024 Jul 15;15(8):1287–97. doi: 10.1021/acsmedchemlett.4c00162 (PMC11318591; doi:10.1021/acsmedchemlett.4c00162), 2024-07-15
Supplement: ml4c00162_si_001.pdf [file ml4c00162_si_001.pdf]

## Supporting Information

### Development of Novel Bacterial Topoisomerase Inhibitors Assisted by Computational Screening

Joshua W. Powell,<sup>a</sup> Chelsea A. Mann,<sup>a</sup> Paul Toth,<sup>b</sup> Sheri Nolan,<sup>c</sup> Anja Steinert,<sup>d</sup> Clarissa Ove,<sup>a</sup> Justin Seffernick,<sup>b</sup> Daniel J. Wozniak,<sup>b,e</sup> Razieh Kebriaei,<sup>d</sup> Steffen Lindert,<sup>b</sup> Neil Osheroff,<sup>g,h</sup> Jack C. Yalowich,<sup>f</sup> Mark J. Mitton-Fry<sup>a,\*</sup>

<sup>a</sup>Division of Medicinal Chemistry and Pharmacognosy, College of Pharmacy, The Ohio State University, Columbus, OH 43210, United States of America

<sup>b</sup>Department of Chemistry and Biochemistry, College of Arts and Sciences, The Ohio State University, Columbus, OH 43210, United States of America

<sup>c</sup>Microbial Infection and Immunity, College of Medicine, The Ohio State University, Columbus, OH 43210, United States of America

<sup>d</sup>Division of Outcomes and Translational Sciences, College of Pharmacy, The Ohio State University, Columbus, OH 43210, United States of America

<sup>e</sup>Department of Microbiology, College of Medicine, The Ohio State University, Columbus, OH 43210, United States of America

<sup>f</sup>Division of Pharmaceutics and Pharmacology, College of Pharmacy, The Ohio State University, Columbus, OH 43210, United States of America

<sup>g</sup>Department of Biochemistry, School of Medicine, Vanderbilt University, Nashville, TN 37232, United States of America

<sup>h</sup>Department of Medicine, School of Medicine, Vanderbilt University, Nashville, TN 37232, United States of America

\*Corresponding author: [mitton-fry.1@osu.edu](mailto:mitton-fry.1@osu.edu)

## Table of Contents

|                                                                                                |           |
|------------------------------------------------------------------------------------------------|-----------|
| Safety Statement.....                                                                          | S2        |
| Assay Methods.....                                                                             | S2-S4     |
| Computational Model Methods.....                                                               | S5        |
| <b>Supplementary Figure S1 and Supplementary Figure S2.....</b>                                | <b>S6</b> |
| <b>Supplementary Equation S1.....</b>                                                          | <b>S7</b> |
| References.....                                                                                | S8-S9     |
| General Chemistry.....                                                                         | S10       |
| General Procedures and Synthesis.....                                                          | S11-S44   |
| <sup>1</sup> HNMR and <sup>13</sup> CNMR Spectra of Synthesized Compounds.....                 | S45-S116  |
| HRMS and UPLC Results of Key Compounds <b>7a</b> , <b>9a</b> , <b>22a</b> , and <b>4</b> ..... | S117-S124 |
| Enantiomeric Excess Results of Key Compound <b>22a</b> .....                                   | S125-S126 |

## Safety Statement

**Caution!** Hydrogen is classified as a GHS Flammable Gas, Category 1. Hydrogen and the hydrogen balloon were handled using flame-resistant PPE, and all open flames were avoided.

**Caution!** Blue lights can cause damage to eyesight. While the lights were in use, orange safety glasses were worn, and the lights were shielded by either orange light shields or cardboard boxes.

## Assay Methods

*Staphylococcus aureus* DNA gyrase supercoiling assays were performed using an Inspiralis Ltd. (Norwich, UK) kit with modifications. DNA gyrase was added to initiate reactions and was present at a level that was just able to supercoil all relaxed pBR322 under the experimental conditions utilized. DNA gyrase was incubated with 250 ng of relaxed pBR322 DNA, DMSO vehicle control (2.5% final), and varying concentrations of drugs/compounds diluted in DMSO (2.5% final) in 30  $\mu$ L total reaction volume at 37 °C for 30 min under the following conditions: 40 mM HEPES-KOH (pH 7.6), 10 mM magnesium acetate, 10 mM DTT, 2 mM ATP, 500 mM potassium glutamate and 0.05 mg/mL BSA. Each reaction was stopped with 30  $\mu$ L STEB buffer (40% sucrose, w/v; 100 mM Tris-HCl (pH 8); 10 mM EDTA (pH 8); 0.5 mg/mL bromophenol blue) followed by the addition of 30  $\mu$ L chloroform/iso-amyl alcohol (24:1) and loaded on a 1% agarose gel run at 70 V for 2 hours. Gels were stained with ethidium bromide (1  $\mu$ g/mL) followed by UV visualization.

*Staphylococcus aureus* topoisomerase IV decatenation assays were performed using an Inspiralis Ltd. (Norwich, UK) kit according to protocol with slight modifications. Decatenation of 100 ng of kDNA was assessed after 20 min incubation at 37 °C in a final 30  $\mu$ L reaction volume with DMSO vehicle control (2.5% final) and varying concentrations of drugs/compounds diluted in DMSO in a buffer containing 50 mM Tris-HCl (pH 7.5), 5 mM magnesium chloride, 5 mM DTT, 1.5 mM ATP, 350 mM potassium glutamate, 0.05 mg/mL BSA. Topo IV was added to initiate reactions and was present at a level that was just able to decatenate 80-100% of the kDNA under the experimental conditions utilized. Reactions were stopped with 30  $\mu$ L STEB buffer (40% sucrose, w/v;

100 mM Tris-HCl (pH 8); 10 mM EDTA (pH 8); 0.5 mg/mL bromophenol blue) followed by the addition of 30  $\mu$ L chloroform/iso-amyl alcohol (24:1). After mixing and centrifugation, aqueous fractions (20  $\mu$ L) were loaded on a 1% agarose gel and run at 70 V for 2 hours. Gels were stained with ethidium bromide (1  $\mu$ g/mL) for UV visualization and quantitation of the percent decatenation in the presence or absence of various concentrations of test compounds for the assessment of 50% inhibitory concentrations.

*Escherichia coli* DNA gyrase supercoiling assays were performed according to the procedures of Aldred et al. and Ashley et al.<sup>1,2</sup> Relaxed DNA was prepared with 1 mg/mL pBR322 and 5X Topo I relaxation buffer (250 mM Tris-HCl pH 7.5, 250 mM KCl, 50 mM MgCl<sub>2</sub>, 2.5 mM DTT, 0.5 mM Na<sub>2</sub>EDTA pH 8.0, 150  $\mu$ g/mL BSA) and calf thymus topoisomerase I. The volume of topoisomerase I used was calculated based on previously established activity of the stock. Samples were incubated at 37°C for 30-45 minutes followed by incubation at 75°C for 10 minutes. DNA concentration was determined by optical density at 260 nm and checked for full relaxation by gel electrophoresis.

Time course experiments were conducted prior to running supercoiling experiments with corresponding compounds to determine the optimal concentration of enzyme to be used and length of incubation. DNA gyrase supercoiling experiments were carried out in 20  $\mu$ L total reaction volume with varying concentrations of compound diluted in 40% DMSO (final 4%), a DMSO enzyme control, and DMSO DNA control. Master mix was prepared on ice with 5X Gyrase Supercoiling buffer (final 1X) (250 mM Tris-HCl, pH 7.5, 875 mM KGlu, 25 mM MgCl<sub>2</sub> and 0.25 mg/mL BSA), 20 mM ATP (1.5 mM/condition), relaxed pBR322 (0.3  $\mu$ g/condition) and H<sub>2</sub>O. The DNA control received Master Mix without enzyme. 20X enzyme dilutions were prepared in dilution buffer (40 mM HEPES-KOH, pH 7.6, 1 mM Na<sub>2</sub>EDTA, 150 mM KGlu, 40% glycerol) on ice with *E. coli* GyrA and GyrB for a final reaction concentration of 7.5 nM Gyr A/B. Diluted enzyme was added to the Master Mix and subsequently added to reaction tubes containing varying concentrations of compound and the DMSO control in a time dependent manner. Reactions were stopped after 30 minutes with stop solution (10% SDS, 250 mM Na<sub>2</sub>EDTA). Loading dye (sucrose, 1M Tris-HCl, pH 7.9, bromophenol blue, xylene cyanole) was added to each sample and loaded onto 1% TBE gel. DNA was separated by gel electrophoresis (150 volts, ~2.5 hr.). Gels were stained with 10 mg/mL EtBr 0.75  $\mu$ g/mL for 30 minutes and destained for 10 minutes. Results were quantified using Alphamager. DNA cleavage plots were generated using Prism (Dotmatics, Boston, MA).

*Staphylococcus aureus* DNA gyrase and topoisomerase IV cleavage assays were performed using modifications of a kit from Inspiralis Ltd. (Norwich, UK). Reactions in 30  $\mu$ L total volume were incubated with varying concentrations of drug/compound diluted in DMSO (3% final DMSO concentrations) at 37 °C for 30 min in assay buffer (40 mM HEPES-KOH (pH 7.6), 10mM magnesium acetate, 10 mM DTT, 100 mM potassium glutamate and 0.05 mg/mL albumin) containing pBR322 (250 ng/condition) and DNA gyrase (15 nM). Complexes were trapped with the addition of 2% (w/v) SDS (3 $\mu$ L) and proteinase K (10 mg/mL) (1.5  $\mu$ L) and incubated at 45 °C for an additional 30 minutes to digest enzyme and reveal single-strand (Nick) and double-strand (Lin) breaks. STEB buffer (30  $\mu$ L) (40 % (w/v) sucrose, 100 mM Tris-HCl (pH 8), and 10 mM EDTA, 0.5 mg/mL bromophenol blue) and chloroform:isoamyl alcohol (24:1) (30  $\mu$ L) were added

followed by vigorous mixing and centrifugation for 2 min. The aqueous phase (20  $\mu$ L) was loaded onto a 1% agarose gel containing 0.7  $\mu$ g/mL ethidium bromide. Gel electrophoresis was conducted (60 V, 2 hours) in 1X TAE buffer containing 0.7  $\mu$ g/mL ethidium bromide. DNA bands were visualized using ImageLab software (Bio-Rad Laboratories, Hercules, Ca). DNA gyrase cleavage experiments utilized total fluorescence in each lane, determined as previously reported,<sup>3</sup> using corrections for differential emission<sup>4</sup> in supercoiled DNA compared to linearized and nicked DNA bands according to followed by calculation of percent total fluorescence in these bands as a measure of DNA cleavage. Topo IV DNA cleavage products were calculated based on total fluorescence in each lane relative to the linearized EcoR1 digested pBR322 sample that contained equal amounts of DNA. Percent cleavage in enzyme alone controls were subtracted (DNA gyrase experiments) and final results were plotted using Sigmaplot 14.5 (Systat Software, Inc., San Jose, Ca).

## Computational Model Methods

The benchmark compounds were initially converted from SMILES strings to 3D structure-data files (SDF), and subsequently evaluated for Pan-assay interference compounds (PAINS) and Lipinski's rule violators using the RDKit Python package.<sup>5</sup> We used Schrödinger's LigPrep tool to generate all tautomers, protomers, and stereoisomers for each ligand.<sup>6</sup> This operation used default parameters apart from the EPIK pH range, which was set to  $7.4 \pm 1.0$ .<sup>7</sup> Seven Protein Data Bank entries (2XCS, 5BS3, 6FM4, 6QTP, 6QTK, 4PLB, 5NPP) served as docking targets.<sup>8-14</sup> Each of these crystal structures included a heterotetramer of two complete GyrA subunits and two GyrB TOPRIM domains of *S. aureus* DNA Gyrase, complexed with an NBTI inhibitor and double-stranded DNA. Resolutions ranged between 2.10 Å and 2.70 Å. These structures were prepared with Schrödinger's Protein Preparation Wizard, which added missing hydrogens and set protonation states with EPIK, adhering to the parameters used in the LigPrep stage.<sup>15</sup> Receptor grids, centered on each structure's co-crystallized inhibitor, were generated and compounds were docked using Glide SP with default parameters.<sup>16</sup> Least square linear regressions between  $\ln IC_{50}$  values and docking scores were calculated for each system using the linear regression model from the Scikit-Learn python package.<sup>17</sup> Bounds for experimental rank were defined previously as Excellent ( $\ln IC_{50} \leq 4.6$ ), Good ( $4.6 < \ln IC_{50} \leq 6.2$ ), Fair ( $6.2 < \ln IC_{50} \leq 7.8$ ), and poor ( $7.8 < \ln IC_{50}$ ). Ranks for Glide docking scores were then set where the regression line intersected these experimental rank boundaries.

Structures of candidate inhibitors were processed similarly: SMILES strings were converted to 3D SDF format, screened for PAINS and Lipinski violations, and prepared using Schrödinger's LigPrep tool. The configurations for each of these preparation steps were identical to the settings used for preparing the benchmark set. Candidate inhibitors were then docked into the top three gyrase receptors based on our benchmarks using Glide SP with default parameters. Docking scores were averaged for ligands that had multiple variants generated during the LigPrep step. Final docking scores were converted to Z-scores to demonstrate the relative performance of each compound across different systems.

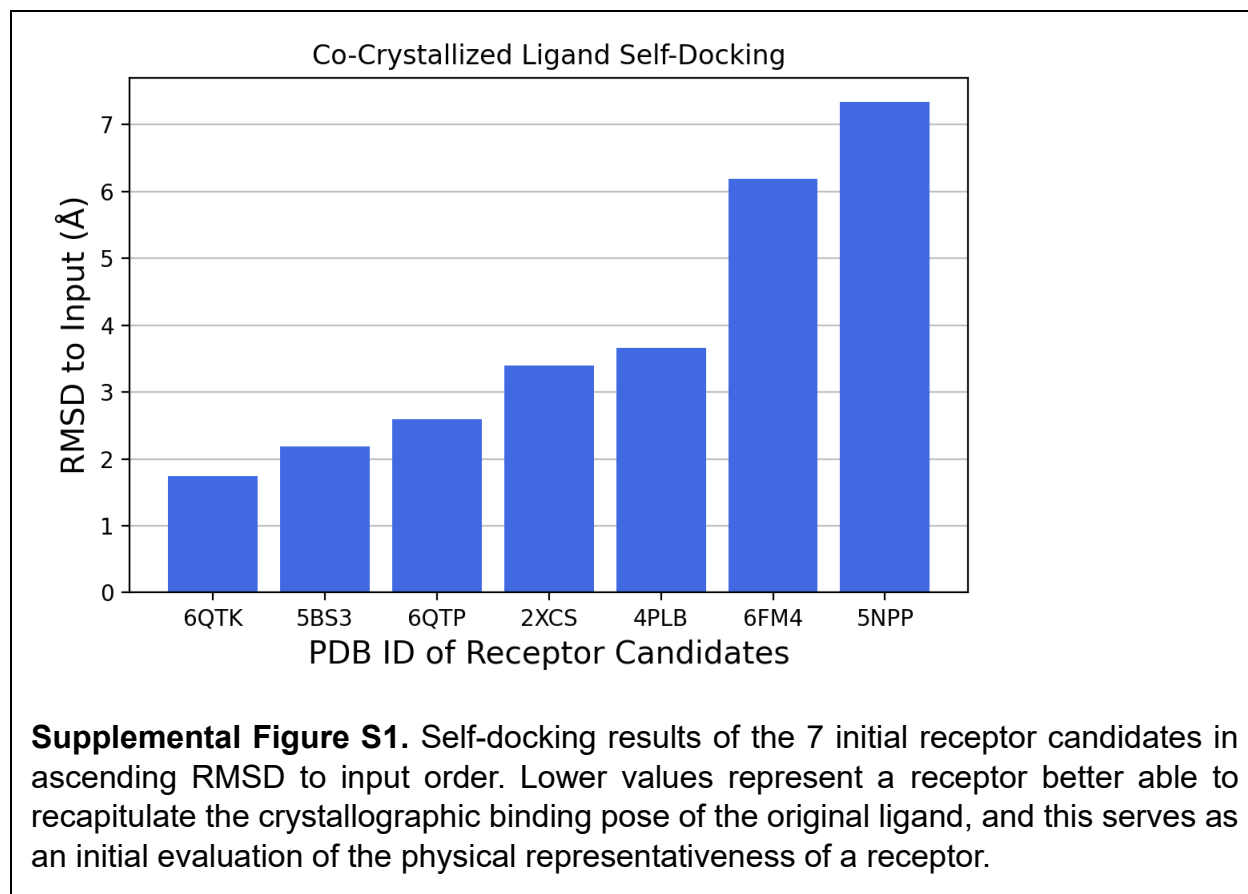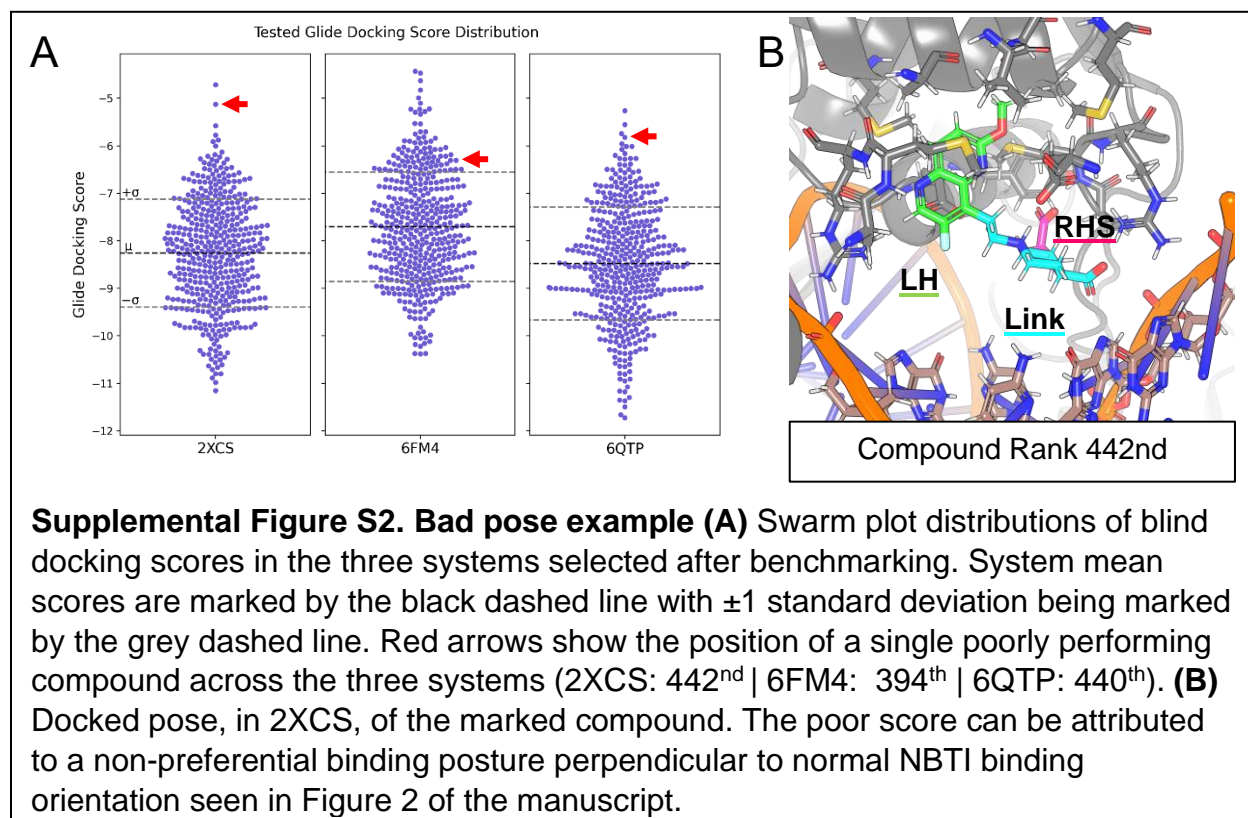

$$ZScore = \frac{x_{GlideScore} - \mu}{\sigma}$$

**Supplemental Equation S1.** Where  $X_{GlideScore}$  is the raw Glide docking score for a compound,  $\mu$  is the mean docking score of all NBTIs tested in that receptor, and  $\sigma$  is the standard deviation of all NBTIs tested in that receptor.

## References

1. Ashley, R. E.; Dittmore, A.; McPherson, S. A.; Turnbough, C. L.; Neuman, K. C.; Osheroff, N. Activities of Gyrase and Topoisomerase IV on Positively Supercoiled DNA. *Nucleic Acids Res.* **2017**, *45* (16), 9611–9624.
2. Aldred, K. J.; Blower, T. R.; Kerns, R. J.; Berger, J. M.; Osheroff, N. Fluoroquinolone Interactions with *Mycobacterium Tuberculosis* Gyrase: Enhancing Drug Activity against Wild-Type and Resistant Gyrase. *Proc. Natl. Acad. Sci.* **2016**, *113* (7).
3. Lu, Y.; Papa, J. L.; Nolan, S.; English, A.; Seffernick, J. T.; Shkolnikov, N.; Powell, J.; Lindert, S.; Wozniak, D. J.; Yalowich, J.; Mitton-Fry, M. J. Dioxane-Linked Amide Derivatives as Novel Bacterial Topoisomerase Inhibitors against Gram-Positive *Staphylococcus Aureus*. *ACS Med. Chem. Lett.* **2020**, *11* (12), 2446–2454.
4. Projan, S. J.; Carleton, S.; Novick, R. P. Determination of Plasmid Copy Number by Fluorescence Densitometry. *Plasmid* **1983**, *9* (2), 182–190.
5. Landrum, G. *RDKit: Open-source Cheminformatics*, 2016.
6. *Schrödinger Release 2023-2: LigPrep*, Schrödinger, LLC: New York, NY, 2023.
7. *Schrödinger Release 2023-2: Epik*, Schrödinger, LLC: New York, NY, 2023.
8. Berman, H. M.; Westbrook, J.; Feng, Z.; Gilliland, G.; Bhat, T. N.; Weissig, H.; Shindyalov, I. N.; Bourne, P. E., The Protein Data Bank. *Nucleic Acids Research* **2000**, *28*, 235-242.
9. Bax, B. D.; Chan, P. F.; Eggleston, D. S.; Fosberry, A.; Gentry, D. R.; Gorrec, F.; Giordano, I.; Hann, M. M.; Hennessy, A.; Hibbs, M.; Huang, J.; Jones, E.; Jones, J.; Brown, K. K.; Lewis, C. J.; May, E. W.; Saunders, M. R.; Singh, O.; Spitzfaden, C. E.; Shen, C.; Shillings, A.; Theobald, A. J.; Wohlkonig, A.; Pearson, N. D.; Gwynn, M. N., Type IIA topoisomerase inhibition by a new class of antibacterial agents. *Nature* **2010**, *466* (7309), 935-40.
10. Singh, S. B.; Kaelin, D. E.; Wu, J.; Miesel, L.; Tan, C. M.; Black, T.; Nargund, R.; Meinke, P. T.; Olsen, D. B.; Lagrutta, A.; Lu, J.; Patel, S.; Rickert, K. W.; Smith, R. F.; Soisson, S.; Sherer, E.; Joyce, L. A.; Wei, C.; Peng, X.; Wang, X.; Fukuda, H.; Kishii, R.; Takei, M.; Takano, H.; Shibasaki, M.; Yajima, M.; Nishimura, A.; Shibata, T.; Fukuda, Y., Tricyclic 1,5-naphthyridinone oxabicyclooctane-linked novel bacterial topoisomerase inhibitors as broad-spectrum antibacterial agents-SAR of left-hand-side moiety (Part-2). *Bioorg Med Chem Lett* **2015**, *25* (9), 1831-5.
11. Magaro, G.; Prati, F.; Garofalo, B.; Corso, G.; Furlotti, G.; Apicella, C.; Mangano, G.; D'Atanasio, N.; Robinson, D.; Di Giorgio, F. P.; Ombrato, R., Virtual Screening Approach and Investigation of Structure-Activity Relationships To Discover Novel Bacterial Topoisomerase Inhibitors Targeting Gram-Positive and Gram-Negative Pathogens. *J Med Chem* **2019**, *62* (16), 7445-7472.
12. Gibson, E. G.; Bax, B.; Chan, P. F.; Osheroff, N., Mechanistic and Structural Basis for the Actions of the Antibacterial Gepotidacin against *Staphylococcus aureus* Gyrase. *ACS Infect Dis* **2019**, *5* (4), 570-581.
13. Singh, S. B.; Kaelin, D. E.; Wu, J.; Miesel, L.; Tan, C. M.; Meinke, P. T.; Olsen, D.; Lagrutta, A.; Bradley, P.; Lu, J.; Patel, S.; Rickert, K. W.; Smith, R. F.; Soisson, S.; Wei, C.; Fukuda, H.; Kishii, R.; Takei, M.; Fukuda, Y.,



- Oxabicyclooctane-linked novel bacterial topoisomerase inhibitors as broad spectrum antibacterial agents. *ACS Med Chem Lett* **2014**, 5 (5), 609-14.
14. Chan, P. F.; Germe, T.; Bax, B. D.; Huang, J.; Thalji, R. K.; Bacque, E.; Checchia, A.; Chen, D.; Cui, H.; Ding, X.; Ingraham, K.; McCloskey, L.; Raha, K.; Srikannathasan, V.; Maxwell, A.; Stavenger, R. A., Thiophene antibacterials that allosterically stabilize DNA-cleavage complexes with DNA gyrase. *Proc Natl Acad Sci U S A* **2017**, 114 (22), E4492-E4500.
  15. *Schrödinger Release 2023-2: Protein Preparation Wizard*, Schrödinger, LLC: New York, NY, 2023.
  16. *Schrödinger Release 2023-2: Glide*, Schrödinger, LLC: New York, NY, 2023.
  17. Pedregosa, F.; Varoquaux, G.; Gramfort, A.; Michel, V.; Thirion, B.; Grisel, O.; Blondel, M.; Prettenhofer, P.; Weiss, R.; Dubourg, V.; Vanderplas, J.; Passos, A.; Cournapeau, D.; Brucher, M.; Perrot, M.; Duchesnay, E., Scikit-learn: Machine Learning in Python. *Journal of Machine Learning Research* **2011**, 12, 2825-2830.

## General Chemistry:

Commercially sourced reactants and solvents were used without additional purification. Tetrahydrofuran (THF), N,N-dimethylformamide (DMF), and dichloromethane (DCM) were purchased as anhydrous solvents. Air- and/or moisture-sensitive reactions were conducted in oven-dried glassware under nitrogen protection unless otherwise noted. Reaction progress was monitored using thin-layer chromatography (TLC) with Merck TLC Silica gel 60 F254. Flash chromatography was performed with a Teledyne-ISCO combiflash Rf+.

<sup>1</sup>H NMR spectra were obtained at 400 MHz using residual protiated solvent as the internal reference: CDCl<sub>3</sub> (7.26 ppm), CD<sub>3</sub>OD (3.31 ppm), DMSO-d<sub>6</sub> (2.50 ppm). <sup>13</sup>C NMR spectra were obtained at 100 MHz using the solvent as the internal reference: CDCl<sub>3</sub> (77.16 ppm), CD<sub>3</sub>OD (49.00 ppm), DMSO-d<sub>6</sub> (39.52 ppm). Some compounds were synthesized multiple times. In such cases, experimental and characterization data are provided for a representative example.

High resolution mass spectrometry was performed using electrospray ionization. Measurements of purity were carried out using a Acquity UPLC BEH C18 column (2.1 x 50 mm i.d., 1.7 μm). The separations were carried out at 40°C at a flow rate of 0.7 mL/min in gradient mode of mobile phases of water + 0.1% formic acid and acetonitrile + 0.1% formic acid. The concentration of tested compounds was ~0.5 mg/mL with 2 μl injection volume. Peak detection was accomplished using a UV detector scanning from 210-500nm. Compounds are >95% pure by UPLC, with the exception of **16a,b**; **22c**; and **23a** for which the purity ranged from 93.3-94.3%.

Measurements of enantiomeric excess (ee) were carried out using a CHIRALPAK® IB N-3 column (150 \* 4.6 mm i.d., 3 μm) at 25°C with a flow rate of 1 mL/min in isocratic mode of mobile phases containing hexane and reagent alcohol, with diethylamine as an additive. The concentration of tested compounds was ~250 μg/ml in ethanol with 30 μl injection volume. Peak detection was accomplished using a UV detector at 220 nm.

## General Procedures and Synthesis

- 1) **Methyl Ketone Arylation:** ( $\pm$ )-BINAP (0.036 eq), Pd<sub>2</sub>(dba)<sub>3</sub> (0.015 eq) and Na<sup>t</sup>BuO (1.3 eq) were added to a round bottom flask and purged with nitrogen. THF (0.17 M) was added, followed by the requisite bromide (1 eq) and commercially available **1** (1.2 eq). The reaction was stirred at 70°C overnight then cooled to room temperature and diluted with water. The aqueous layer was extracted 5x15 mL ethyl acetate, and the combined organic layers were dried over sodium sulfate, decanted, and concentrated *in vacuo*. The crude mixtures were purified by flash chromatography.

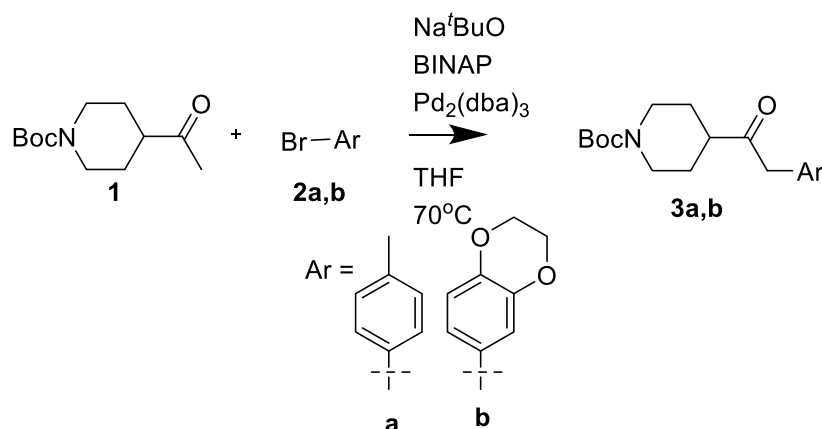

### **tert-butyl 4-(2-(*p*-tolyl)acetyl)piperidine-1-carboxylate (3a)**

The title compound was synthesized using commercially available **2a** according to General Procedure 1. Purification by flash chromatography (compound eluted in 0-10% ethyl acetate in hexanes) and concentration *in vacuo* afforded the title compound (260 mg, 0.819 mmol, 82% yield).

<sup>1</sup>HNMR (CDCl<sub>3</sub>, 400 MHz)  $\delta$ : 7.13 (d,  $J$  = 8.0 Hz, 2H), 7.07 (d,  $J$  = 8.0 Hz, 2H), 4.12-4.00 (m, 2H), 3.70 (s, 2H), 2.73 (t,  $J$  = 12.3 Hz, 2H), 2.58 (tt,  $J$  = 3.8, 11.3 Hz, 1H), 2.33 (s, 3H), 1.80-1.71 (m, 2H), 1.60-1.49 (m, 2H, obscured by water), 1.44 (s, 9H).

### **tert-butyl 4-(2-(2,3-dihydrobenzo[b][1,4]dioxin-6-yl)acetyl)piperidine-1-carboxylate (3b)**

The title compound was synthesized using commercially available **2b** according to General Procedure 1. Purification by flash chromatography (compound eluted in 5-15% ethyl acetate in hexanes) and concentration *in vacuo* afforded the title compound as a yellow oil (180 mg, 0.498 mmol, 50% yield).

<sup>1</sup>HNMR (CDCl<sub>3</sub>, 400 MHz, contaminated w/ ethyl acetate and acetone)  $\delta$ : 6.81 (d,  $J$  = 8.2 Hz, 1H), 6.69 (d,  $J$  = 2.0 Hz, 1H), 6.64 (dd,  $J$  = 2.1, 8.2 Hz, 1H), 4.24 (s, 4H), 4.13-4.02 (m, 2H), 3.62 (s, 2H), 2.77-2.70 (m, 2H), 2.57 (tt,  $J$  = 3.7, 11.2 Hz, 1H), 1.60-1.48 (m, 4H, obscured by water), 1.45 (s, 9H).

- 2) **Deprotection of Boc Group:** The requisite Boc-protected piperidine (1 eq) was dissolved in methanol (0.25 M), and 4 M HCl in 1,4-dioxane (2-2.5 eq) was added dropwise. The reaction was stirred for 4 hours, whereupon the stir bar was

removed, and the reaction was concentrated to afford the crude product as a hydrochloride salt. No further purification was carried out at this stage.

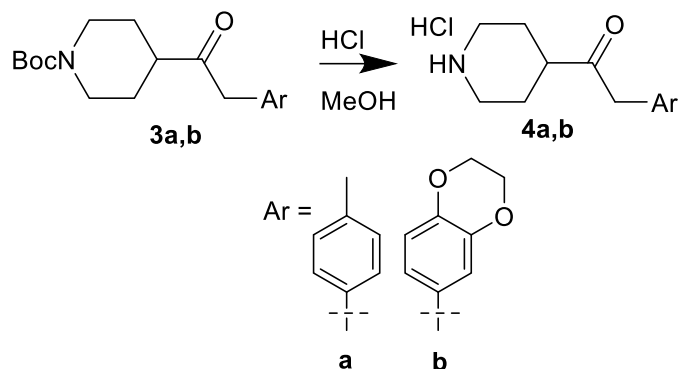

### 1-(piperidin-4-yl)-2-(*p*-tolyl)ethan-1-one\*hydrochloride (4a)

The title compound was synthesized using **3a** according to General Procedure 2. The crude product was used directly in the next step.

### 2-(2,3-dihydrobenzo[*b*][1,4]dioxin-6-yl)-1-(piperidin-4-yl)ethan-1-one\*hydrochloride (4b)

The title compound was synthesized using **3b** according to General Procedure 2. The crude product was used directly in the next step.

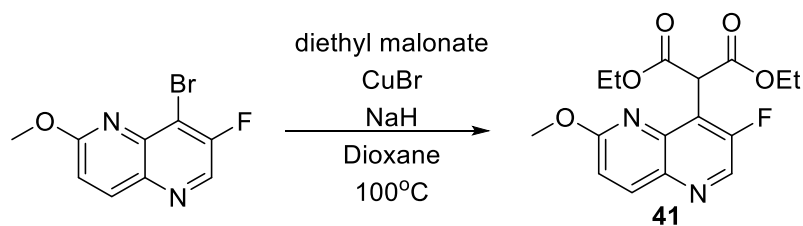

### diethyl 2-(3-fluoro-6-methoxy-1,5-naphthyridin-4-yl)malonate (41)

Sodium hydride (2.4 g, 60 mmol, 3 eq) was added to 3-neck flask. Base was dissolved in 1,4-dioxane (41 mL). A reflux condenser was attached, and the flask was capped. Diethyl malonate (9.15 mL, 60 mmol, 3 eq) was added dropwise by syringe. Once all malonate was added, the flask was heated to 80°C for 1 hour. After 1 hour, copper (I) bromide (1 g, 7 mmol, 0.35 eq) and commercially available 8-bromo-7-fluoro-2-methoxy-1,5-naphthyridine (5.14 g, 20 mmol, 1 eq) were added to the flask. Reaction was heated to 100°C overnight. Upon return, reaction was cooled to room temperature and filtered through a celite plug washing with excess ethyl acetate. Organics were concentrated via rotary evaporation to afford a crude mixture that was purified via flash chromatography eluting in 5% ethyl acetate in hexanes. The title compound was afforded as a clear oil (5.7 g, 16.9 mmol, 84.74%). The reaction was run multiple times with an average yield of 75%.

<sup>1</sup>HNMR (CDCl<sub>3</sub>, 400 MHz) δ: 1HNMR (CDCl<sub>3</sub>, 400 MHz, contaminated with dioxane, impure) δ: 8.71 (d, J = 1.1 Hz, 1H), 8.21 (d, J = 9.0 Hz, 1H), 7.10 (d, J = 9.1 Hz, 1H), 5.79 (s, 1H), 4.26 (q, J = 7.1 Hz, 4H), 4.04 (s, 3H), 1.25 (t, J = 7.1 Hz, 6H).

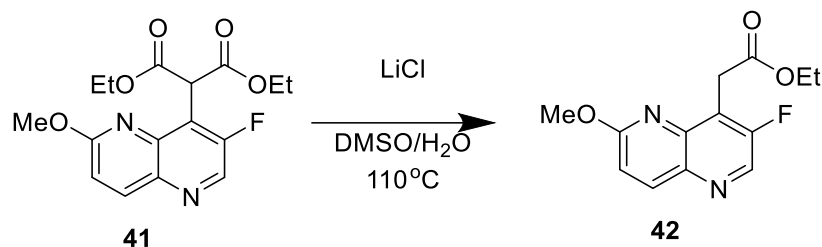

### ethyl 2-(3-fluoro-6-methoxy-1,5-naphthyridin-4-yl)acetate (42)

41 (1 eq), lithium chloride (4 eq), DMSO (0.2 M), and water (1.2 eq) were added to a round bottom flask. Reaction was heated to 110°C overnight. Upon return, reaction was cooled to room temperature and diluted with water. The aqueous layer was extracted 5x15 mL ethyl acetate. Organics were dried over sodium sulfate, decanted, and concentrated via rotary evaporation to afford a crude mixture that was purified via flash chromatography (eluting 0-5% ethyl acetate in hexanes) to afford the title compound as a clear oil. The reaction was run multiple times with an average yield of 70%.

<sup>1</sup>HNMR (CDCl<sub>3</sub>, 400 MHz, impure) δ: 8.68 (s, 1H), 8.19 (d, *J* = 9.0 Hz, 1H), 7.08 (d, *J* = 9.0 Hz, 1H), 4.20-4.14 (m, 4H), 4.05 (s, 3H), 1.22 (t, *J* = 7.1 Hz, 3H).

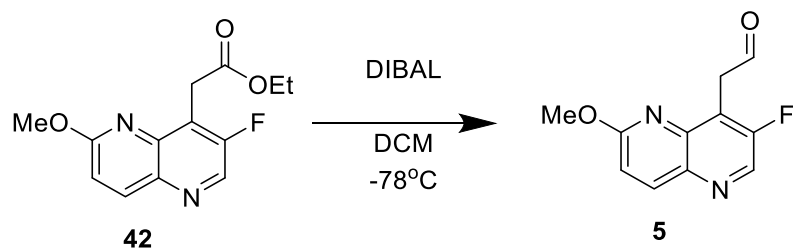

### 2-(3-fluoro-6-methoxy-1,5-naphthyridin-4-yl)acetaldehyde (5)

42 (1 eq) was dissolved in DCM (0.2 M) and cooled to -78°C. Diisobutylaluminum hydride (DIBAL)(2 eq) was then added dropwise, maintaining a temperature less than -75°C. Once addition was complete, reaction stirred an additional 2 hrs. Reaction was quenched with dropwise addition of methanol, maintaining temperature less than -75°C. Once quenched, reaction was warmed to room temperature and saturated, and aqueous Rochelle's salt was added. Reaction stirred until aqueous layer was separable from organics. Reaction was further diluted with water and extracted 5x15 mL ethyl acetate. Organics were dried over sodium sulfate, decanted, and concentrated via rotary evaporation to afford a crude mixture that was purified via flash chromatography (eluting 0-5% ethyl acetate in hexanes) to afford the title compound as a yellow solid.

The reaction was run multiple times with an average yield of 40%.

<sup>1</sup>HNMR (CDCl<sub>3</sub>, 400 MHz, impure) δ: 9.86 (d, *J* = 1.2 Hz, 1H), 8.71 (s, 1H), 8.25 (d, *J* = 9.1 Hz, 1H), 7.11 (d, *J* = 9.1 Hz, 1H), 4.21 (t, *J* = 1.4 Hz, 2H), 4.02 (s, 3H).

- 3) Reductive Amination of Aldehyde: Compound 5 (1.0 eq), the requisite piperidine (1.1 eq), and 4Å molecular sieves (350 mg/mmol of aldehyde) were added to a round bottom flask. Methanol and THF (1:1, 0.25 M) were added, followed by acetic acid (1.5 eq). The reaction was stirred for 4 hours. Sodium

cyanoborohydride (1.2 or 2.0 eq) was added and the reaction was stirred for one additional hour. The reaction was diluted with saturated aqueous sodium carbonate, and the aqueous layer was extracted 5x15 mL ethyl acetate. The combined organic layers were dried with sodium sulfate, decanted, and concentrated *in vacuo*. The crude mixtures were purified by flash chromatography.

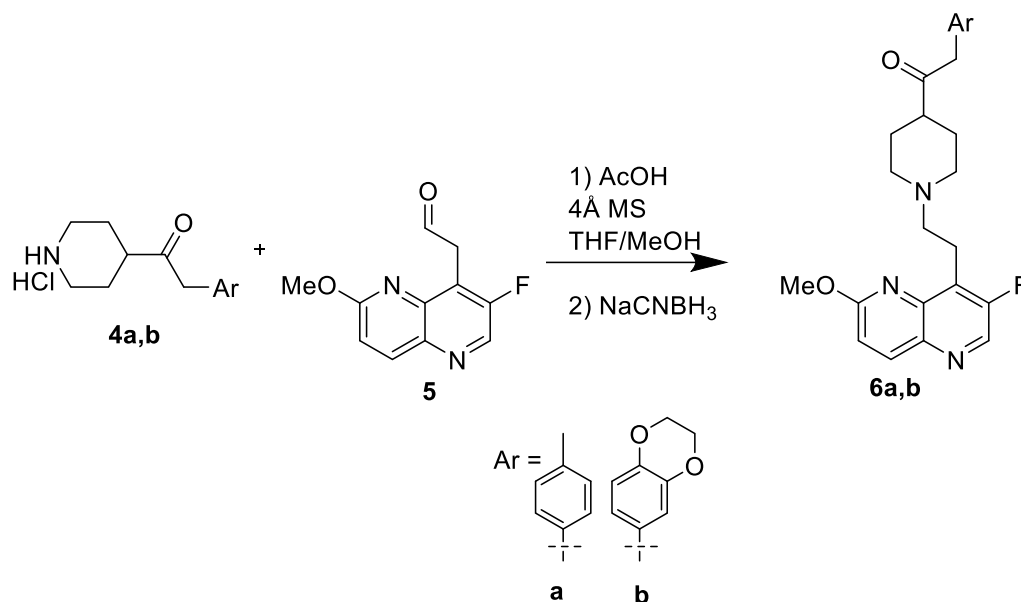

### 1-(1-(2-(3-fluoro-6-methoxy-1,5-naphthyridin-4-yl)ethyl)piperidin-4-yl)-2-(*p*-tolyl)ethan-1-one (6a)

The title compound was synthesized using **4a** according to General Procedure 3. Purification by flash chromatography (compound eluted in 0-20% ethyl acetate in hexanes) and concentration *in vacuo* afforded the title compound as a yellow solid (175 mg, 0.415 mmol, 65% yield).

$^1\text{H}$ NMR ( $\text{CDCl}_3$ , 400 MHz)  $\delta$ : 8.63 (s, 1H), 8.19 (d,  $J = 9.0$  Hz, 1H), 7.15 (d,  $J = 7.9$  Hz, 2H), 7.11-7.07 (m, 3H), 4.10 (s, 3H), 3.73 (s, 2H), 3.47-3.36 (m, 2H), 3.15-3.06 (m, 2H), 2.82-2.71 (m, 2H), 2.50-2.40 (m, 1H), 2.35 (s, 3H), 2.23-2.10 (m, 2H), 1.94-1.68 (m, 4H). HRMS (ESI)  $m/z$  calc'd for  $\text{C}_{25}\text{H}_{29}\text{FN}_3\text{O}_2$  [ $\text{M}+\text{H}$ ] $^+$ : 422.22383; found: 422.22263. UPLC: rt: 3.60 min, purity: 95.5%.

### 2-(2,3-dihydrobenzo[b][1,4]dioxin-6-yl)-1-(1-(2-(3-fluoro-6-methoxy-1,5-naphthyridin-4-yl)ethyl)piperidin-4-yl)ethan-1-one (6b)

The title compound was synthesized using **4b** according to General Procedure 3. Purification by flash chromatography (compound eluted in 5-15% ethyl acetate in hexanes) and concentration *in vacuo* afforded the title compound as a yellow solid (55 mg, 0.118 mmol, 22% yield).

$^1\text{H}$ NMR ( $\text{DMSO}-d_6$ , 400 MHz)  $\delta$ : 8.77 (s, 1H), 8.28 (d,  $J = 9.0$  Hz, 1H), 7.24 (d,  $J = 9.0$  Hz, 1H), 6.75 (d,  $J = 8.2$  Hz, 1H), 6.65 (d,  $J = 2.0$  Hz, 1H), 6.59 (dd,  $J = 2.0, 8.2$  Hz, 1H), 4.20 (s, 4H), 4.04 (s, 3H), 3.67 (s, 2H), 3.31-3.27 (m, 2H, obscured by water), 3.10-2.94 (m, 2H), 2.70-2.63 (m, 2H), 2.46-2.38 (m, 1H), 2.10-2.00 (m, 2H), 1.80-1.72 (m, 2H), 1.45-1.33 (m, 2H).  $^{13}\text{C}$ NMR ( $\text{DMSO}-d_6$ , 100 MHz)  $\delta$ : 210.08, 162.01, 156.82 (d,  $J =$

254.1 Hz), 143.00, 142.00, 140.89 (d,  $J = 7.1$  Hz), 140.43, 138.09 (d,  $J = 2.0$  Hz), 137.88 (d,  $J = 27.8$  Hz), expected 130 peak is lost in baseline noise, 127.68, 122.31, 118.10, 116.70, 115.31 (d,  $J = 2.3$  Hz), 64.00, 63.95, 56.63, 53.58, 52.25, 47.27, 45.85, 27.43, 20.55. HRMS (ESI)  $m/z$  calc'd for  $C_{26}H_{29}FN_3O_4$   $[M+H]^+$ : 466.21366; found: 466.2128. UPLC: rt: 3.399 min, purity: 96.9%.

- 4) **Ketone Reduction:** The requisite ketone (1.0 eq) was dissolved in methanol (0.2 M). Sodium borohydride (1.2 eq) was added, and the reaction was allowed to stir, monitoring by TLC for consumption of starting material. Once starting material was consumed, the reaction was diluted with saturated aqueous sodium carbonate and extracted 5x10 mL 10% methanol in dichloromethane. The combined organic layers were dried over sodium sulfate, decanted, and concentrated *in vacuo*. The crude mixtures were purified by flash chromatography.

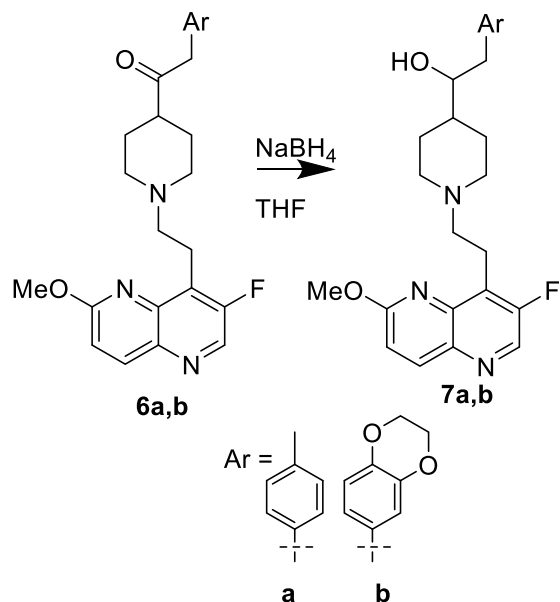

#### 1-(1-(2-(3-fluoro-6-methoxy-1,5-naphthyridin-4-yl)ethyl)piperidin-4-yl)-2-(*p*-tolylethanol-1-ol (7a)

The title compound was synthesized using **6a** according to General Procedure 4. Purification by flash chromatography (compound eluted in 0-0.5% methanol in DCM) and concentration *in vacuo* afforded the title compound as a clear oil (23 mg, 0.054 mmol, 15% yield).

$^1\text{H}$ NMR ( $\text{CDCl}_3$ , 400 MHz)  $\delta$ : 8.61 (s, 1H), 8.17 (d,  $J = 9.0$  Hz, 1H), 7.13 (d,  $J = 8.3$  Hz, 2H), 7.11 (d,  $J = 8.4$  Hz, 2H), 7.07 (d,  $J = 9.0$  Hz, 1H), 4.09 (s, 3H), 3.68-3.55 (m, 1H), 3.47-3.39 (m, 2H), 3.22-3.13 (m, 2H), 2.89 (dd,  $J = 3.2, 13.7$  Hz, 1H), 2.80-2.71 (m, 2H), 2.54 (dd,  $J = 9.6, 13.7$  Hz, 1H), 2.33 (s, 3H), 2.19-2.07 (m, 2H), 1.98-1.91 (m, 1H), 1.81-1.73 (m, 1H), 1.60-1.41 (m, 4H).  $^{13}\text{C}$ NMR ( $\text{CDCl}_3$ , 100 MHz)  $\delta$ : 162.56, 157.42 (d,  $J = 255.4$  Hz), 141.78 (d,  $J = 7.1$  Hz), 140.29, 138.66 (d,  $J = 2.0$  Hz), 138.20, 137.92, 136.22, 135.61, 129.50, 129.41, 115.35 (d,  $J = 2.1$  Hz), 76.33, 57.48, 53.98, 53.65 (overlapping signals), 41.55, 40.50, 28.55, 28.07, 21.15, 21.02. HRMS (ESI)  $m/z$  calc'd

for C<sub>25</sub>H<sub>31</sub>FN<sub>3</sub>O<sub>2</sub> [M+H]<sup>+</sup>: 424.23948; found: 424.23825. UPLC: rt: 3.49 min, purity: 96.6%.

**2-(2,3-dihydrobenzo[b][1,4]dioxin-6-yl)-1-(1-(2-(3-fluoro-6-methoxy-1,5-naphthyridin-4-yl)ethyl)piperidin-4-yl)ethan-1-ol (7b)**

The title compound was synthesized using **6b** according to General Procedure 4. Purification by flash chromatography (compound eluted in 0-0.5% methanol in DCM) and concentration *in vacuo* afforded the title compound as a white solid (5 mg, 0.011 mmol, 10% yield).

<sup>1</sup>HNMR (DMSO-d<sub>6</sub>, 400 MHz) δ: 8.77 (s, 1H), 8.28 (d, *J* = 9.0 Hz, 1H), 7.24 (d, *J* = 9.0 Hz, 1H), 6.71 (d, *J* = 8.2 Hz, 1H), 6.69 (d, *J* = 1.8 Hz, 1H), 6.63 (dd, *J* = 1.9, 8.2 Hz, 1H), 4.35-4.30 (m, 1H), 4.19 (s, 4H), 4.04 (s, 3H), 3.38-3.28 (m, 2H, obscured by water), 3.09-2.98 (m, 2H), 2.7-2.61 (m, 2H), 2.59 (dd, *J* = 3.7, 11.2 Hz, 1H), 2.41 (dd, *J* = 8.1, 13.7 Hz, 1H), 2.00-1.88 (m, 2H), 1.74-1.67 (m, 1H), 1.55-1.47 (m, 1H), 1.39-1.31 (m, 4H). HRMS (ESI) *m/z* calc'd for C<sub>26</sub>H<sub>31</sub>FN<sub>3</sub>O<sub>4</sub> [M+H]<sup>+</sup>: 468.22931; found: 468.22876. UPLC: rt: 3.322 min, purity: 97.7%.

- 5) Reductive Amination on Ketone: The requisite ketone (1.0 eq) and racemic *tert*-butylsulfonamide (1.2 eq) were added to a round bottom flask. The flask was sparged with nitrogen followed by the addition of THF (0.2 M) and titanium ethoxide (1 eq). The reaction was stirred at 70°C overnight. Upon return, the reaction was cooled to room temperature, and methanol (equal volume to THF) was added followed by sodium borohydride (1.2 eq). The reaction was stirred an additional 30 minutes before dilution with saturated aqueous sodium carbonate. The aqueous layer was extracted 5x15 mL ethyl acetate, and the combined organic layers were dried over sodium sulfate, decanted, and concentrated by rotary evaporation. The crude mixtures were used directly in the next step without purification.



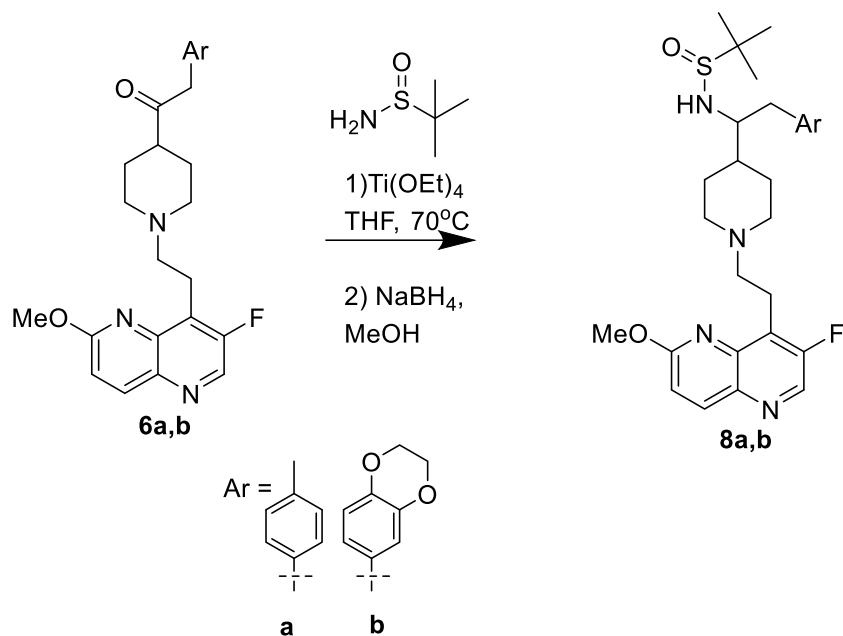

**N-(1-(1-(2-(3-fluoro-6-methoxy-1,5-naphthyridin-4-yl)ethyl)piperidin-4-yl)-2-(*p*-tolyl)ethyl)-2-methylpropane-2-sulfinamide (8a)**

The title compound was synthesized using **6a** according to General Procedure 5 and used directly in the next step.

**N-(2-(2,3-dihydrobenzo[*b*][1,4]dioxin-6-yl)-1-(1-(2-(3-fluoro-6-methoxy-1,5-naphthyridin-4-yl)ethyl)piperidin-4-yl)ethyl)-2-methylpropane-2-sulfinamide (8b)**

Title compound was synthesized using **6b** according to General Procedure 5 and directly in the next step.

- 6) Deprotection of Sulfinamide: The requisite sulfinamide (1 eq) was dissolved in methanol (0.2 M). 4 M HCl (2 eq) was added, and the reaction was allowed to stir, monitoring by TLC. Once starting material was consumed, reaction was basified to pH of ~12 with 1M aqueous sodium hydroxide. This mixture was extracted 5x10 mL 10% methanol in dichloromethane. The combined organic layers were dried over sodium sulfate, decanted, and concentrated by rotary evaporation. The crude mixtures were purified by flash chromatography.

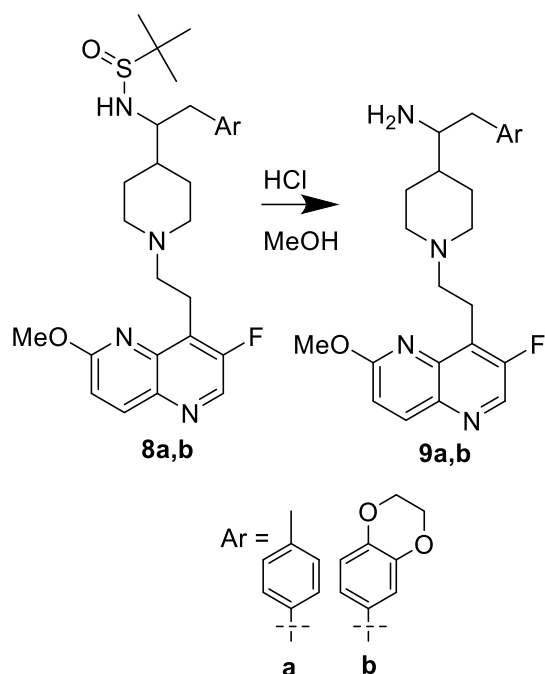

**1-(1-(2-(3-fluoro-6-methoxy-1,5-naphthyridin-4-yl)ethyl)piperidin-4-yl)-2-(p-tolyl)ethan-1-amine (9a)**

The title compound was synthesized using **8a** according to General Procedure 6. Purification by flash chromatography (compound eluted in 0-1% methanol in DCM) and concentration *in vacuo* afforded the title compound as a white solid (8 mg, 0.0189 mmol, 25% yield).

$^1\text{H}$ NMR (DMSO- $d_6$ , 400 MHz, contaminated w/ methanol)  $\delta$ : 8.77 (s, 1H), 8.28 (d,  $J = 9.0$  Hz, 1H), 7.24 (d,  $J = 9.0$  Hz, 1H), 7.12 (s, 4H), 4.04 (s, 3H), 3.33-3.26 (m, 3H), 3.09-3.00 (m, 3H), 2.78 (dd,  $J = 6.4, 13.9$  Hz, 1H), 2.69-2.62 (m, 3H), 2.27 (s, 3H), 1.95-1.86 (m, 2H), 1.69-1.63 (m, 1H), 1.59-1.55 (m, 1H), 1.43-1.18 (m, 4H).  $^{13}\text{C}$ NMR (DMSO- $d_6$ , 100 MHz, contaminated w/  $\text{CDCl}_3$ )  $\delta$ : 162.38, 156.67 (d,  $J = 256.7$  Hz), 140.55 (d,  $J = 6.3$  Hz), 140.49, 138.23 (d,  $J = 10.9$  Hz), 138.09 (d,  $J = 14.5$  Hz), 135.87, 133.28, 129.29, 129.22, 126.31 (d,  $J = 12.6$  Hz), 115.67 (d,  $J = 2.3$  Hz), 55.00, 54.21, 53.66, 51.04 (d,  $J = 10.4$  Hz), 35.16, 34.53, 24.74, 24.44, 20.64, 18.02. HRMS (ESI)  $m/z$  calc'd for  $\text{C}_{25}\text{H}_{32}\text{FN}_4\text{O}$   $[\text{M}+\text{H}]^+$ : 423.25547; found: 423.25473. UPLC: rt: 2.824 min, purity: 95.9%.

**2-(2,3-dihydrobenzo[b][1,4]dioxin-6-yl)-1-(1-(2-(3-fluoro-6-methoxy-1,5-naphthyridin-4-yl)ethyl)piperidin-4-yl)ethan-1-amine (9b)**

The title compound was synthesized using **8b** according to General Procedure 6. Purification by flash chromatography (compound eluted in 0.6% methanol in DCM) and concentration *in vacuo* afforded the title compound as an off-white solid (8 mg, 0.0171 mmol, 33% yield).

$^1\text{H}$ NMR (DMSO- $d_6$ , 400 MHz, contaminated with DMSO)  $\delta$ : 8.77 (s, 1H), 8.28 (d,  $J = 9.0$  Hz, 1H), 7.24 (d,  $J = 9.0$  Hz, 1H), 6.76 (d,  $J = 8.2$  Hz, 1H), 6.72 (d,  $J = 1.9$  Hz, 1H), 6.66 (dd,  $J = 2.0, 8.2$  Hz, 1H), 4.98 (br s, 2H), 4.20 (s, 4H), 4.04 (s, 3H), 3.37-3.26 (m, 2H), 3.08-3.00 (m, 2H), 2.90-2.83 (m, 1H), 2.71-2.63 (m, 3H), 2.47-2.40 (m, 1H), 1.98-1.88 (m, 2H), 1.69-1.63 (m, 1H), 1.60-1.54 (m, 1H), 1.40-1.18 (m, 3H).  $^{13}\text{C}$ NMR (DMSO- $d_6$ , 100

MHz, contaminated with CDCl<sub>3</sub> and DMSO)  $\delta$ : 161.98, 156.84 (d,  $J$  = 254.09), 143.09, 141.81, 140.92 (d,  $J$  = 7.1 Hz), 140.43, 138.09 (d,  $J$  = 1.8 Hz), 137.87 (d,  $J$  = 27.7 Hz), 131.55, 130.09 (d,  $J$  = 13.0 Hz), 121.89, 117.63, 116.81, 115.30 (d,  $J$  = 2.4 Hz), 63.97 (d,  $J$  = 8.3 Hz), 56.74, 56.22, 53.55, 53.09 (d,  $J$  = 3.5 Hz), 37.63, 28.21, 26.70, 20.69. HRMS (ESI)  $m/z$  calc'd for C<sub>26</sub>H<sub>32</sub>FN<sub>4</sub>O<sub>3</sub> [M+H]<sup>+</sup>: 467.24530; found: 467.24423. UPLC: rt: 2.735 min, purity: 98.2%.

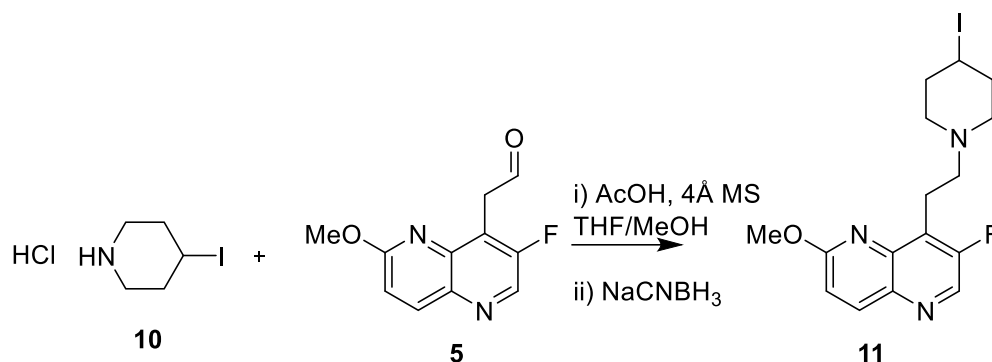

### 7-fluoro-8-(2-(4-iodopiperidin-1-yl)ethyl)-2-methoxy-1,5-naphthyridine (11)

The title compound was synthesized using commercially available **10** according to General Procedure 3. Purification by flash chromatography (compound eluted in 5-15% ethyl acetate in hexanes) and concentration *in vacuo* afforded the title compound as a yellow solid (265 mg, 0.6396 mmol, 64% yield).

<sup>1</sup>HNMR (CDCl<sub>3</sub>, 400 MHz)  $\delta$ : 8.62 (s, 1H), 8.18 (d,  $J$  = 9.0 Hz, 1H), 7.08 (d,  $J$  = 9.1 Hz, 1H), 4.34 (br s, 1H), 4.08 (s, 3H), 3.50-3.32 (br s, 2H), 2.94-2.66 (m, 4H), 2.57-2.30 (m, 2H), 2.25-2.09 (m, 4H).

- 7) **Suzuki Reaction.** The requisite aryl bromide (1eq), triethylamine (1.5 eq), Pd(dppf)Cl<sub>2</sub> (0.1 eq), and isopropanol (0.2 eq) were added to a pressure vial. The reaction was heated to 100°C overnight then cooled to room temperature and filtered through a celite plug, washing with ethyl acetate. The ethyl acetate solution was dried over sodium sulfate, decanted, and concentrated by rotary evaporation to afford crude mixtures that were purified by flash chromatography.

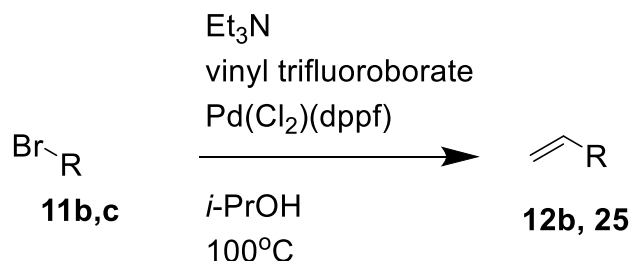

R =

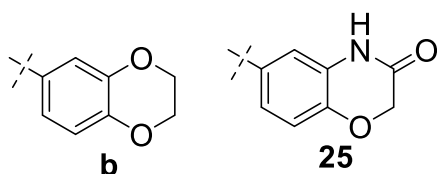

### 6-vinyl-2,3-dihydrobenzo[b][1,4]dioxine (12b)

The title compound was synthesized using commercially available **11b** according to general procedure 7. Purification by flash chromatography (compound eluted in 0-5% ethyl acetate in hexanes) and concentration *in vacuo* afforded the title compound (contaminated by residual starting material) as a clear oil (140 mg, 0.863 mmol, 43%).

### 6-vinyl-2H-benzo[b][1,4]oxazin-3(4H)-one (25)

The title compound was synthesized using commercially available **11c** according to general procedure 7. Purification by flash chromatography (compound eluted in 0-10% ethyl acetate in hexanes) and concentration *in vacuo* afforded the title compound as a white solid (320 mg, 1.83 mmol, 91%).

<sup>1</sup>HNMR (CDCl<sub>3</sub>, 400 MHz) δ: 7.75 (s, 1H), 7.03 (dd, *J* = 1.9, 8.4 Hz, 1H), 6.93 (d, *J* = 8.3 Hz, 1H), 6.83 (d, *J* = 1.9 Hz, 1H), 6.62 (dd, *J* = 10.8, 17.6 Hz, 1H), 5.63 (dd, *J* = 0.6, 17.5 Hz, 1H), 5.21 (dd, *J* = 0.5, 10.9 Hz, 1H), 4.62 (s, 2H).

- 8) Photo-Heck Coupling: 4-CZIPN (0.05 eq), Co(dmgh)(dmgh<sub>2</sub>)Cl<sub>2</sub> (0.03 eq), the requisite iodo-piperidine (1.0 or 2.0 eq), dibasic potassium phosphate (2.0 eq), and aromatic vinyl groups (1.0 eq) were added to a round bottom flask. DMF (0.1 M) was added, followed by triethylamine (2 eq), and the reaction was irradiated with 440 nm blue light, positioned 5-20 cm from the flask, for 17-24 hours. The reaction was stirred for 17-24 hours, monitoring by TLC. Once alkene starting material was consumed, the reaction was stopped by turning off the light. The reaction was diluted with water and extracted 5x15 mL ethyl acetate. The combined organic layers dried over sodium sulfate, decanted, and concentrated by rotary evaporation. The crude mixtures were purified by flash chromatography.

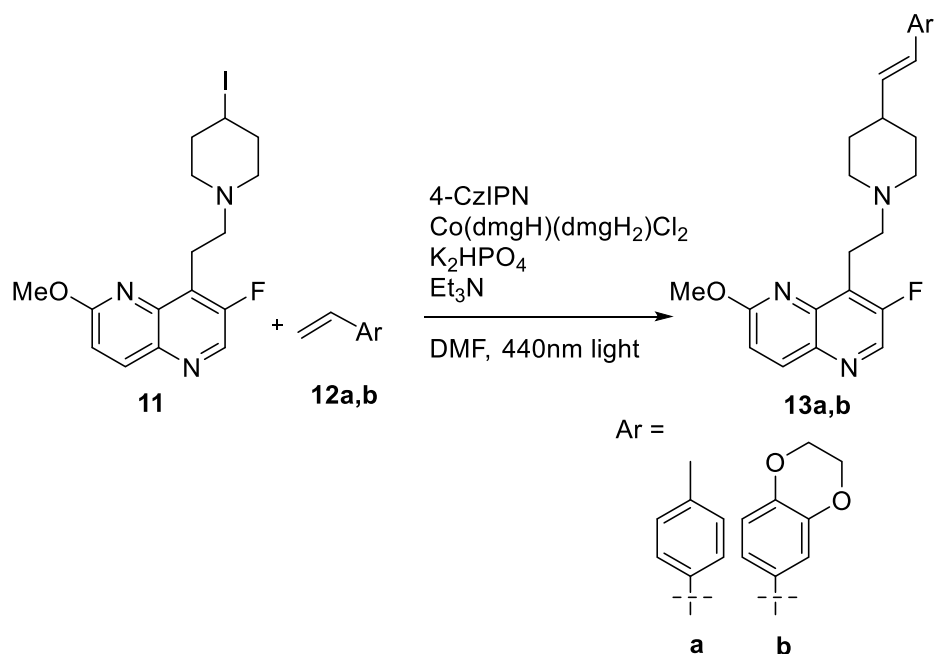

**(E)-7-fluoro-2-methoxy-8-(2-(4-(4-methylstyryl)piperidin-1-yl)ethyl)-1,5-naphthyridine (13a)**

The title compound was synthesized using **11** and commercially available **12a** according to General Procedure 8. Purification by flash chromatography (compound eluted in 5-40% ethyl acetate in hexanes) and concentration *in vacuo* afforded the title compound as a yellow solid (158 mg, 0.390 mmol, 40% yield).

<sup>1</sup>HNMR (CD<sub>3</sub>OD, 400 MHz) δ: 8.64 (s, 1H), 8.21 (d, *J* = 9.1 Hz, 1H), 7.23 (d, *J* = 8.0 Hz, 2H), 7.18 (d, *J* = 9.1 Hz, 1H), 7.08 (d, *J* = 8.0 Hz, 2H), 6.38 (d, *J* = 16.0 Hz, 1H), 6.15 (dd, *J* = 16.0, 6.9 Hz, 1H), 4.12 (s, 3H), 3.53-3.47 (m, 2H), 3.22-3.15 (m, 2H), 2.84-2.77 (m, 2H), 2.32-2.14 (m, 3H), 2.29 (s, 3H), 1.88-1.79 (m, 2H), 1.63-1.51 (m, 2H). <sup>13</sup>CNMR (CDCl<sub>3</sub>, 100 MHz) δ: 162.55, 157.43 (d, *J* = 255.2 Hz), 141.80 (d, *J* = 7.1 Hz), 140.29, 138.66 (d, *J* = 2.0 Hz), 138.06 (d, *J* = 28.1 Hz), 136.83, 135.05, 134.21, 130.72 (d, *J* = 12.6 Hz), 129.33, 128.16, 126.03, 115.33 (d, *J* = 2.6 Hz), 57.59, 53.97, 53.52, 39.47, 32.34, 21.27, 21.06. HRMS (ESI) *m/z* calc'd for C<sub>25</sub>H<sub>29</sub>FN<sub>3</sub>O [M+H]<sup>+</sup>: 406.22892; found: 406.2283. UPLC: rt: 3.93 min, purity: 95.7%.

**(E)-8-(2-(4-(2-(2,3-dihydrobenzo[*b*][1,4]dioxin-6-yl)vinyl)piperidin-1-yl)ethyl)-7-fluoro-2-methoxy-1,5-naphthyridine (13b)**

The title compound was synthesized using **47** and **46b** according to General Procedure 8. Purification by flash chromatography (compound eluted in 5-20% ethyl acetate in hexanes) and concentration *in vacuo* afforded the title compound as a white solid (105 mg, 0.234 mmol, 28% yield).

<sup>1</sup>HNMR (CDCl<sub>3</sub>, 400 MHz) δ: 8.61, (s, 1H), 8.17 (d, *J* = 9.0 Hz, 1H), 7.07 (d, *J* = 9.0 Hz, 1H), 6.87 (d, *J* = 1.9 Hz, 1H), 6.83 (dd, *J* = 2.0, 8.4 Hz, 1H), 6.78 (d, *J* = 8.3 Hz, 1H), 6.26 (d, *J* = 15.9 Hz, 1H), 6.02 (d, *J* = 7.0, 15.9 Hz, 1H), 4.24 (s, 4H), 4.09 (s, 3H), 3.47-3.38 (m, 2H), 3.16-3.07 (m, 2H), 2.80-2.71 (m, 2H), 2.25-2.06 (m, 3H), 1.83-1.73 (m, 2H), 1.67-1.48 (m, partially obscured by water, 2H). <sup>13</sup>CNMR (CDCl<sub>3</sub>, 100 MHz) δ: 162.56, 157.43 (d, *J* = 255.5 Hz), 143.64, 142.92, 141.81 (d, *J* = 7.0 Hz), 140.30, 138.67 (d, *J* = 2.0 Hz), 138.21, 137.93, 133.79, 131.75, 127.59, 119.52, 117.36, 115.34 (d, *J* = 2.6 Hz), 114.64, 64.59, 64.54, 57.61, 53.98, 53.53, 39.40, 32.39, 29.85, 21.08. HRMS (ESI) *m/z* calc'd for C<sub>26</sub>H<sub>29</sub>FN<sub>3</sub>O<sub>3</sub> [M+H]<sup>+</sup>: 450.21875; found: 450.21744. UPLC: rt: 3.66 min, purity: 98.76%.

- 9) Alkene Hydrogenation: The alkene starting material (1 eq) was dissolved in methanol (0.2 M), and 10% Pd/C (0.1 eq) was added. The reaction was sparged once with a nitrogen balloon, followed by once with a hydrogen balloon. A hydrogen balloon was attached to the reaction flask by needle through a septum and allowed to stir overnight. Upon return, the reaction was sparged once with a nitrogen balloon and filtered through a celite plug, washing with methanol. The organics were concentrated by rotary evaporation to afford crude mixtures that were purified by flash chromatography.

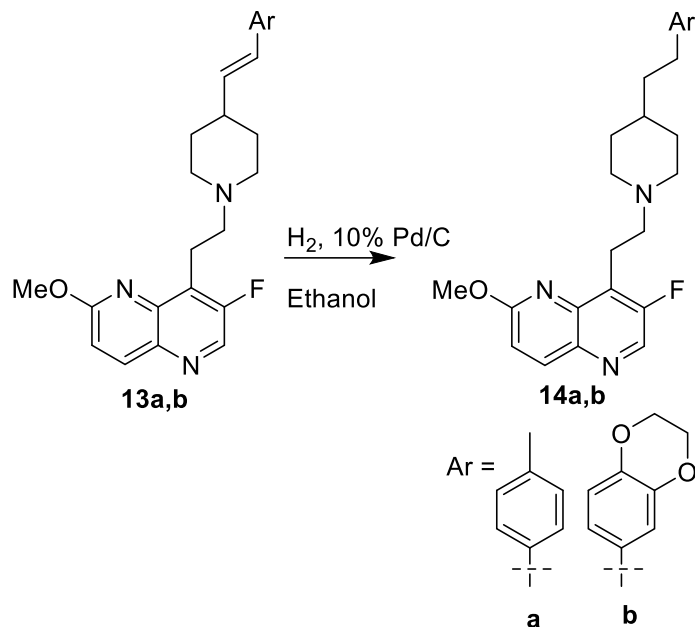

### 7-fluoro-2-methoxy-8-(2-(4-(4-methylphenethyl)piperidin-1-yl)ethyl)-1,5-naphthyridine (14a)

The title compound was synthesized using **13a** according to General Procedure 9. Purification by flash chromatography (compound eluted in 0-20% ethyl acetate in hexanes) and concentration *in vacuo* afforded the title compound (4 mg, 0.010 mmol, 16% yield).

$^1\text{H NMR}$  ( $\text{CDCl}_3$ , 400 MHz)  $\delta$ : 8.61 (s, 1H), 8.17 (d,  $J = 9.0$  Hz, 1H), 7.12-7.03 (m, 5H), 4.08 (s, 3H), 3.45-3.36 (m, 2H), 3.12-3.04 (m, 2H), 2.76-2.67 (m, 2H), 2.64-2.55 (m, 2H), 2.32 (s, 3H), 2.16-2.03 (m, 2H), 1.83-1.72 (m, 2H), 1.61-1.51 (m, 2H), 1.40-1.27 (m, 3H). HRMS (ESI)  $m/z$  calc'd for  $\text{C}_{25}\text{H}_{31}\text{FN}_3\text{O}$   $[\text{M}+\text{H}]^+$ : 408.24457; found: 408.24403. UPLC: rt: 3.97 min, purity: 96.9%.

### 8-(2-(4-(2-(2,3-dihydrobenzo[b][1,4]dioxin-6-yl)ethyl)piperidin-1-yl)ethyl)-7-fluoro-2-methoxy-1,5-naphthyridine (14b)

The title compound was synthesized using **13b** according to General Procedure 9. Purification by flash chromatography (compound eluted in 5-15% ethyl acetate in hexanes) and concentration *in vacuo* afforded the title compound (15 mg, 0.033 mmol, 17% yield).

$^1\text{H NMR}$  ( $\text{DMSO-d}_6$ , 400 MHz, contaminated w/ DCM)  $\delta$ : 8.76 (s, 1H), 8.27 (d,  $J = 9.0$  Hz, 1H), 7.23 (d,  $J = 9.0$  Hz, 1H), 6.71 (d,  $J = 8.1$  Hz, 1H), 6.64 (d,  $J = 1.8$  Hz, 1H), 6.60 (dd,  $J = 1.9, 8.2$  Hz, 1H), 4.18 (s, 4H), 4.03 (s, 3H), 3.31-3.27 (m, 2H), 2.97-2.94 (m, 2H), 2.68-2.60 (m, 2H), 2.46-2.42 (m, 2H), 2.02-1.92 (m, 2H), 1.68-1.61 (m, 2H), 1.44-1.37 (m, 2H), 1.22-1.03 (m, 2H).  $^{13}\text{C NMR}$  ( $\text{DMSO-d}_6$ , 100 MHz)  $\delta$ : 161.97, 156.80 (d,  $J = 254.2$  Hz), 143.02, 141.25, 140.89 (d,  $J = 6.8$  Hz), 140.39, 138.07 (d,  $J = 1.6$  Hz), 137.85 (d,  $J = 27.8$  Hz), 135.34, expected 130 peak is lost in baseline noise, 120.80, 116.65, 116.52, 115.27, 64.00, 63.89, 56.83, 53.52, 53.02, 37.98, 34.65, 31.90, 31.50, 20.62. HRMS (ESI)  $m/z$  calc'd for  $\text{C}_{26}\text{H}_{31}\text{FN}_3\text{O}_3$   $[\text{M}+\text{H}]^+$ : 452.2344; found: 452.23306. UPLC: rt: 3.694 min, purity: 98.0%.

10) Asymmetric Dihydroxylation: The alkene starting material (1 eq) was dissolved in *tert*-butanol (0.1 M) and diluted with water (0.1 M), and the respective AD-mix (1.2 g/mmol starting material) was added. The reaction was stirred overnight, monitoring by TLC. Once starting material was consumed, the reaction was quenched with aqueous, saturated sodium sulfite and allowed to stir for 15 minutes. The reaction was diluted with water and extracted 5x10 mL 10% methanol in dichloromethane. The combined organic layers were dried over sodium sulfate, decanted, and concentrated by rotary evaporation to afford crude mixtures that were purified by flash chromatography.

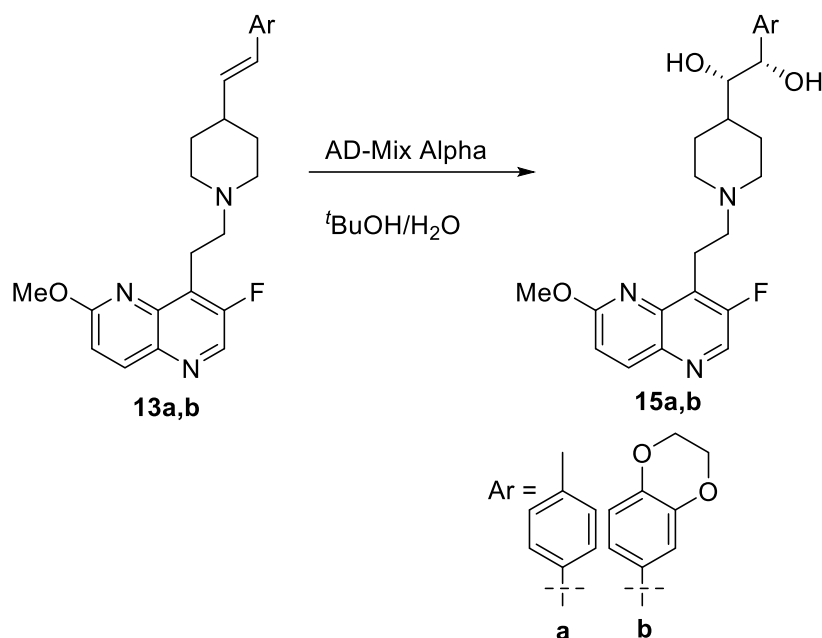

**(1*S*,2*S*)-1-(1-(2-(3-fluoro-6-methoxy-1,5-naphthyridin-4-yl)ethyl)piperidin-4-yl)-2-(*p*-tolyl)ethane-1,2-diol (15a)**

The title compound was synthesized using **13a** according to General Procedure 10 with AD-mix  $\alpha$ . Purification by flash chromatography (compound eluted in ethyl acetate) and concentration *in vacuo* afforded the title compound as a clear oil (65 mg, 0.148 mmol, 60% yield).

$^1\text{H}$ NMR ( $\text{CD}_3\text{OD}$ , 400 MHz)  $\delta$ : 8.63 (s, 1H), 8.20 (d,  $J = 9.1$  Hz, 1H), 7.25 (d,  $J = 8.0$ , 2H), 7.19-7.13 (m, 3H), 4.59 (d,  $J = 5.7$  Hz, 1H), 4.10 (s, 3H), 3.50-3.40 (m, 3H), 3.21-3.11 (m, 2H), 2.79-2.71 (m, 2H), 2.32 (s, 3H), 2.14-2.02 (m, 2H), 1.90-1.82 (m, 1H), 1.68-1.47 (m, 3H), 1.41-1.31 (m, 1H).  $^{13}\text{C}$ NMR (DMSO- $d_6$ , 100 MHz, contaminated w/ ethyl acetate)  $\delta$ : 161.95, 156.82 (d,  $J = 254.1$  Hz), 140.91 (d,  $J = 7.1$  Hz), 140.75, 140.39, 138.07 (d,  $J = 2.2$  Hz), 137.84 (d,  $J = 27.8$  Hz), 135.59, 130.16 (d,  $J = 13.0$  Hz), 128.30, 126.64, 115.25 (d,  $J = 2.0$  Hz), 78.09, 73.20, 56.86, 53.52, 53.18, 37.57, 29.09, 26.49, 20.74, 20.69, 20.67. HRMS (ESI)  $m/z$  calc'd for  $\text{C}_{25}\text{H}_{31}\text{FN}_3\text{O}_3$   $[\text{M}+\text{H}]^+$ : 440.2344; found: 440.23407. UPLC: rt: 3.271 min, purity: 95.6%. Enantiomeric excess (ee) determined to be 96.3% by chiral HPLC (98/2 hexane/reagent alcohol).

**(1S,2S)-1-(2,3-dihydrobenzo[b][1,4]dioxin-6-yl)-2-(1-(2-(3-fluoro-6-methoxy-1,5-naphthyridin-4-yl)ethyl)piperidin-4-yl)ethane-1,2-diol (15b)**

The title compound was synthesized using **13b** according to General Procedure 10 with AD-mix  $\alpha$ . Purification by flash chromatography (compound eluted in 0-1% methanol in DCM) and concentration *in vacuo* afforded the title compound as a clear oil (15 mg, 0.031 mmol, 12% yield).

$^1\text{H}$ NMR (DMSO- $d_6$ , 400 MHz, contaminated with DMSO)  $\delta$ : 8.76 (s, 1H), 8.27 (d,  $J = 9.0$  Hz, 1H), 7.23 (d,  $J = 9.0$  Hz, 1H), 6.80 (s, 1H), 6.77-6.72 (m, 2H), 4.92 (d,  $J = 4.9$  Hz, 1H), 4.36 (t,  $J = 5.2$  Hz, 1H), 4.26 (br d,  $J = 5.5$  Hz, 1H), 4.2 (s, 4H), 4.03 (s, 3H), 3.31-3.23 (m, 2H, partially obscured by water), 3.18-3.12 (m, 1H, partially obscured by methanol), 3.03-2.92 (m, 2H), 2.69-2.57 (m, 2H), 1.96-1.77 (m, 2H), 1.72-1.63 (m, 1H), 1.49-1.11 (m, 4H).  $^{13}\text{C}$ NMR (DMSO- $d_6$ , 100 MHz)  $\delta$ : 161.98, 156.84 (d,  $J = 254.2$  Hz), 142.77, 142.08, 140.93 (d,  $J = 7.1$  Hz), 140.43, 138.09 (d,  $J = 2.2$  Hz), 137.88 (d,  $J = 27.7$  Hz), 136.98, expected 130 peak is lost in baseline noise, 119.48, 116.20, 115.41, 115.30 (d,  $J = 2.1$  Hz), 77.98, 72.77, 64.02, 63.98, 56.84, 53.57, 53.16, 37.55, 29.00, 26.54, 20.65 (overlapping signals). HRMS (ESI)  $m/z$  calc'd for  $\text{C}_{26}\text{H}_{31}\text{FN}_3\text{O}_5$   $[\text{M}+\text{H}]^+$ : 484.22423; found: 484.22348. UPLC: rt: 3.103 min, purity: 97.6%. Enantiomeric excess (ee) determined to be 97.8% by chiral HPLC (90/10 hexane/reagent alcohol with 0.1% diethylamine as an additive).

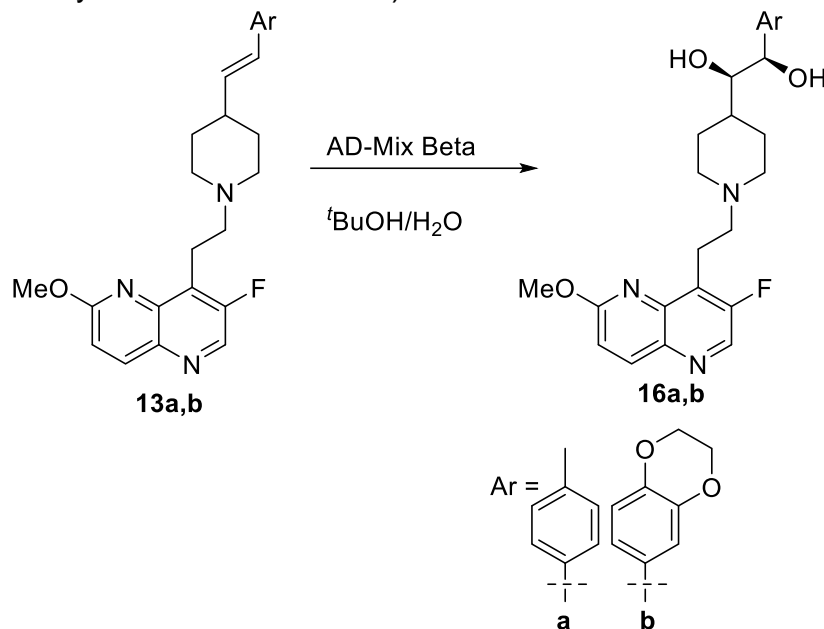

**(1R,2R)-1-(1-(2-(3-fluoro-6-methoxy-1,5-naphthyridin-4-yl)ethyl)piperidin-4-yl)-2-(p-tolyl)ethane-1,2-diol (16a)**

The title compound was synthesized using **13a** according to General Procedure 10 with AD-mix  $\beta$ . Purification by flash chromatography (compound eluted in DCM) and concentration *in vacuo* afforded the title compound as a clear oil (55 mg, 0.148 mmol, 60% yield).

$^1\text{H}$ NMR ( $\text{CD}_3\text{OD}$ , 400 MHz)  $\delta$ : 8.63 (s, 1H), 8.20 (d,  $J = 9.1$  Hz, 1H), 7.25 (d,  $J = 8.0$  Hz, 2H), 7.19-7.13 (m, 3H), 4.59 (d,  $J = 5.8$  Hz, 1H), 4.10 (s, 3H), 3.50-3.40 (m, 3H), 3.23-3.14 (m, 2H), 2.83-2.73 (m, 2H), 2.32 (s, 3H), 2.19-2.04 (m, 2H), 1.91-1.83 (m, 1H), 1.70-1.49 (m, 3H), 1.42-1.32 (m, 1H). HRMS (ESI)  $m/z$  calc'd for  $\text{C}_{25}\text{H}_{31}\text{FN}_3\text{O}_3$



[M+H]<sup>+</sup>: 440.2344; found: 440.23349. UPLC: rt: 3.27 min, purity: 93.3%. Enantiomeric excess (ee) determined to be 100% by chiral HPLC (98/2 hexane/reagent alcohol).

**(1*R*,2*R*)-1-(2,3-dihydrobenzo[*b*][1,4]dioxin-6-yl)-2-(1-(2-(3-fluoro-6-methoxy-1,5-naphthyridin-4-yl)ethyl)piperidin-4-yl)ethane-1,2-diol (16b)**

The title compound was synthesized using **13b** according to General Procedure 10 with AD-mix β. Purification by flash chromatography (compound eluted in ethyl acetate) and concentration *in vacuo* afforded the title compound as a clear oil (16 mg, 0.033 mmol, 20% yield).

<sup>1</sup>HNMR (DMSO-d<sub>6</sub>, 400 MHz, contaminated with ethyl acetate) δ: 8.76 (s, 1H), 8.27 (d, *J* = 9.0 Hz, 1H), 7.23 (d, *J* = 9.0 Hz, 1H), 6.80 (s, 1H), 6.77-6.72 (m, 2H), 4.92 (d, *J* = 5.0 Hz, 1H), 4.36 (t, *J* = 5.2 Hz, 1H), 4.25 (d, *J* = 5.9 Hz, 1H), 4.20 (s, 4H), 4.03 (s, 3H), 3.30-3.24 (m, 2H), 3.14 (q, *J* = 5.4 Hz, 1H), 3.01-2.92 (m, 2H), 2.61 (t, *J* = 7.4 Hz, 2H), 1.92-1.78 (m, 2H), 1.71-1.63 (m, 1H), 1.47-1.20 (m, 4H). <sup>13</sup>CNMR (DMSO-d<sub>6</sub>, 100 MHz, contaminated w/ ethyl acetate) δ: 161.96, 156.83 (d, *J* = 254.2 Hz), 142.75, 142.07, 140.93 (d, *J* = 7.0 Hz), 140.41, 138.08 (d, *J* = 2.1 Hz), 137.86 (d, *J* = 27.8 Hz), 136.98, expected 130 peak is lost in baseline noise, 119.46, 116.18, 115.39, 115.27 (d, *J* = 2.2 Hz), 78.00, 72.75, 64.00, 63.97, 56.89, 53.54, 53.20, 37.61, 29.05, 26.60, 20.74, 20.68. HRMS (ESI) *m/z* calc'd for C<sub>26</sub>H<sub>31</sub>FN<sub>3</sub>O<sub>5</sub> [M+H]<sup>+</sup>: 484.22423; found: 484.2233. UPLC: rt: 3.073 min, purity: 94.2%. Enantiomeric excess (ee) determined to be 99% by chiral HPLC (90/10 hexane/reagent alcohol with 0.1% diethylamine as an additive).

- 11) Wittig Reaction: Commercially available **17** (2.0 eq) was suspended in THF (0.2 M), and potassium *tert*-butoxide (1 M solution in THF, 2.0 eq) was added. This mixture was stirred for 1 hour, becoming orange in color. The reaction was then cooled to 0°C and stirred an additional 5 mins. Aldehyde (1.0 eq) was added, and the reaction was stirred overnight, warming to room temperature. Upon return, reaction was quenched with saturated aqueous ammonium chloride and filtered through a celite plug, washing with 3 volumes of ethyl acetate. The organics were dried over sodium sulfate, decanted, and concentrated by rotary evaporation to afford crude mixtures that were purified by flash chromatography.

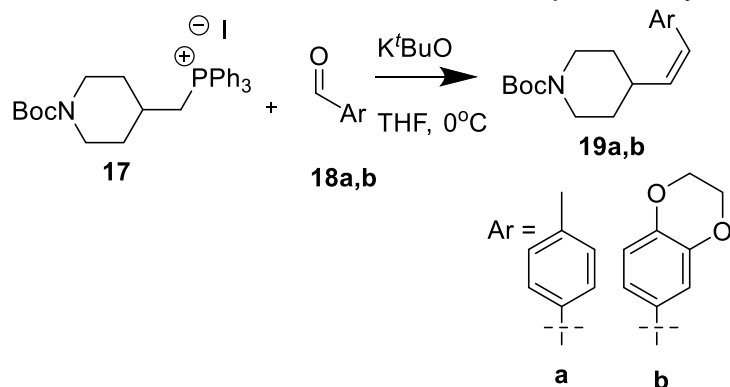

***tert*-butyl (*Z*)-4-(4-methylstyryl)piperidine-1-carboxylate (19a)**

The title compound was synthesized using commercially available **18a** using General Procedure 11. Purification by flash chromatography (compound eluted in 0-2% ethyl acetate in hexanes) and concentration *in vacuo* afforded the title compound as a clear oil (440 mg, 1.46 mmol, 73% yield).

$^1\text{H NMR}$  ( $\text{CDCl}_3$ , 400 MHz)  $\delta$ : 7.14 (s, 4H), 6.36 (d,  $J = 11.7$  Hz, 1H), 5.41 (dd,  $J = 10, 11.6$  Hz, 1H), 4.10-4.05 (m, 2H), 2.77-2.66 (m, 3H), 2.35 (s, 3H), 1.70-1.64 (m, 2H), 1.46 (s, 9H), 1.41-1.30 (m, 2H).

***tert*-butyl (*Z*)-4-(2-(2,3-dihydrobenzo[*b*][1,4]dioxin-6-yl)vinyl)piperidine-1-carboxylate (**19b**)**

The title compound was synthesized using commercially available **18b** according to General Procedure 11. Purification by flash chromatography (compound eluted in 0-5% ethyl acetate in hexanes) and concentration *in vacuo* afforded the title compound as a yellow oil (65% average yield).

$^1\text{H NMR}$  ( $\text{CDCl}_3$ , 400 MHz)  $\delta$ : 6.83 (d,  $J = 8.3$  Hz, 1H), 6.77 (d,  $J = 2.0$  Hz, 1H), 6.73 (dd,  $J = 2.0, 8.2$  Hz, 1H), 6.27 (d,  $J = 11.6$  Hz, 1H), 5.36 (dd,  $J = 10.0, 11.6$  Hz, 1H), 4.27 (s, 4H), 4.13-4.01 (m, 2H), 2.80-2.67 (m, 3H), 1.70-1.63 (m, 2H), 1.46 (s, 9H), 1.40-1.28 (m, 2H).

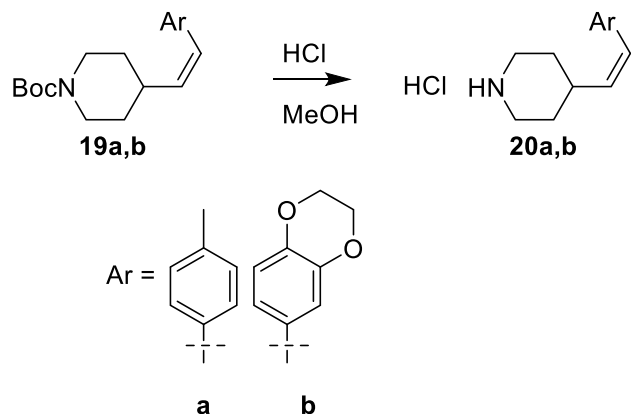

**(*Z*)-4-(4-methylstyryl)piperidine\*hydrogen chloride (**20a**)**

The title compound was synthesized using **19a** according to General Procedure 2 and used directly in the next step.

**(*Z*)-4-(2-(2,3-dihydrobenzo[*b*][1,4]dioxin-6-yl)vinyl)piperidine\*hydrogen chloride (**20b**)**

The title compound was synthesized using **19b** according to General Procedure 2 and used directly in the next step.

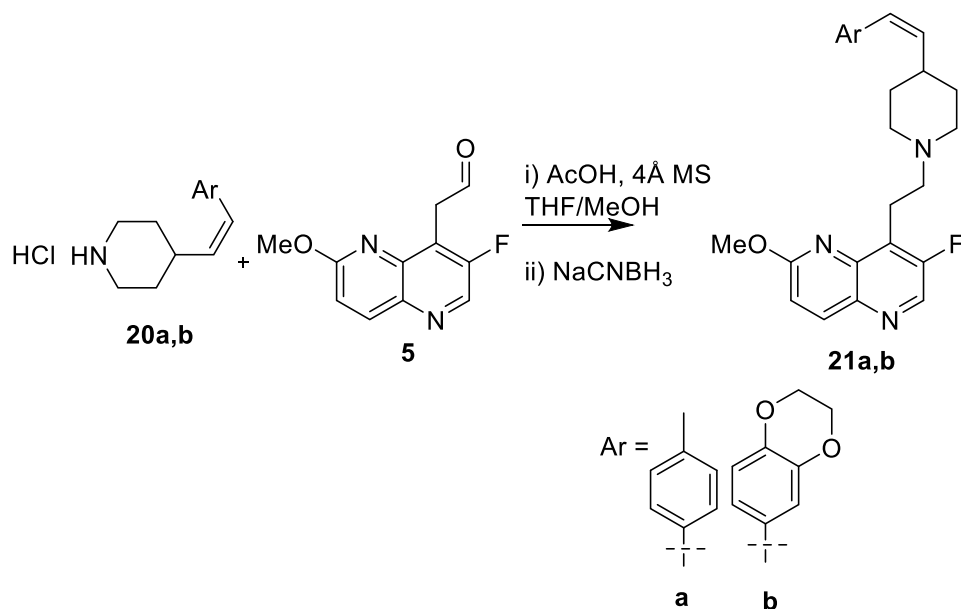

**(Z)-7-fluoro-2-methoxy-8-(2-(4-(4-methylstyryl)piperidin-1-yl)ethyl)-1,5-naphthyridine (21a)**

The title compound was synthesized using **20a** according to General Procedure 3. Purification by flash chromatography (compound eluted in 0-10% ethyl acetate in hexanes) and concentration *in vacuo* afforded the title compound as a yellow oil (91 mg, 0.224 mmol, 62% yield).

<sup>1</sup>HNMR (DMSO-d<sub>6</sub>, 400 MHz) δ: 8.77 (s, 1H), 8.27 (d, *J* = 9.0 Hz, 1H), 7.23 (d, *J* = 9.1 Hz, 1H), 7.16 (d, *J* = 8.5 Hz, 2H), 7.13 (d, *J* = 8.6 Hz, 2H), 6.30 (d, *J* = 11.6 Hz, 1H), 5.42 (dd, *J* = 10.2, 11.2 Hz, 1H), 4.03 (s, 3H), 3.31-3.28 (m, 3H), 2.98-2.95 (m, 2H), 2.68-2.63 (m, 2H), 2.28 (s, 3H), 2.07-2.02 (m, 2H), 1.62-1.59 (m, 2H), 1.40-1.30 (m, 2H). <sup>13</sup>CNMR (DMSO-d<sub>6</sub>, 100 MHz) δ: 161.98, 156.80 (d, *J* = 254.3 Hz), 140.90 (d, *J* = 7.0 Hz), 140.39, 138.08 (d, *J* = 1.4 Hz), 137.85 (d, *J* = 27.8 Hz), 136.59, 135.89, 134.19, expected 130 peak is lost in baseline noise, 128.91, 128.17, 127.54, 115.27, 56.87, 53.55, 52.41, 34.65, 31.96, 20.68, 20.60. HRMS (ESI) *m/z* calc'd for C<sub>25</sub>H<sub>29</sub>FN<sub>3</sub>O [M+H]<sup>+</sup>: 406.22892; found: 406.22882. UPLC: rt: 3.92 min, purity: 97.7%.

**(Z)-8-(2-(4-(2-(2,3-dihydrobenzo[b][1,4]dioxin-6-yl)vinyl)piperidin-1-yl)ethyl)-7-fluoro-2-methoxy-1,5-naphthyridine (21b)**

The title compound was synthesized using **20b** according to General Procedure 3. Purification by flash chromatography (compound eluted in 0-10% ethyl acetate in hexanes) and concentration *in vacuo* afforded the title compound as a clear oil (197 mg, 0.438 mmol, 58% yield).

<sup>1</sup>HNMR (CDCl<sub>3</sub>, 400 MHz) δ: 8.61 (s, 1H), 8.17 (d, *J* = 9.0 Hz, 1H), 7.07 (d, *J* = 9.0 Hz, 1H), 6.82 (d, *J* = 8.3 Hz, 1H), 6.78 (d, *J* = 1.9 Hz, 1H), 6.74 (dd, *J* = 1.9, 8.3 Hz, 1H), 6.25 (d, *J* = 11.6 Hz, 1H), 5.39 (dd, *J* = 10.0, 11.6 Hz, 1H), 4.26 (s, 4H), 4.08 (s, 3H), 3.46-3.38 (m, 2H), 3.13-3.04 (m, 2H), 2.79-2.70 (m, 2H), 2.67-2.55 (m, 1H), 2.25-2.13 (m, 2H), 1.78-1.70 (m, 2H), 1.62-1.47 (m, partially obscured by water, 2H). <sup>13</sup>CNMR (CDCl<sub>3</sub>, 100 MHz) δ: 162.56, 157.42 (d, *J* = 255.4 Hz), 143.29, 142.54, 141.80 (d, *J* = 6.8 Hz), 140.29, 138.66 (d, *J* = 2.1 Hz), 138.20, 137.92, 136.56, 131.43, 127.48, 122.13, 117.34, 117.14, 115.34 (d, *J* = 2.6 Hz), 64.57, 64.55, 57.64, 54.00, 53.17,

35.04, 32.57, 20.99. HRMS (ESI)  $m/z$  calc'd for  $C_{26}H_{29}FN_3O_3$   $[M+H]^+$ : 450.21875; found: 450.21753. UPLC: rt: 3.70 min, purity: 98.57%.

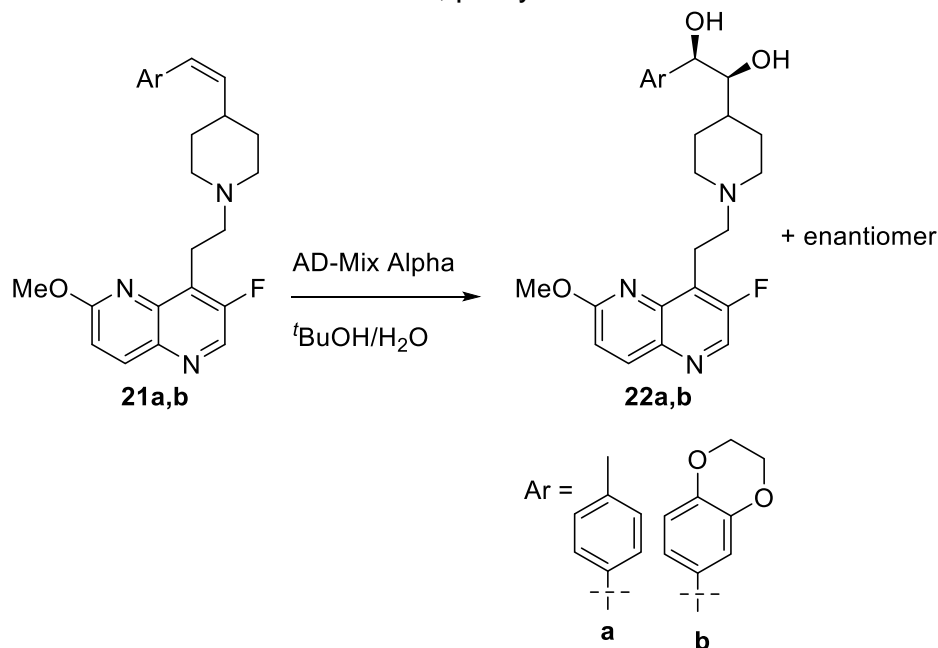

**(1S,2R)-1-(1-(2-(3-fluoro-6-methoxy-1,5-naphthyridin-4-yl)ethyl)piperidin-4-yl)-2-(p-tolyl)ethane-1,2-diol (22a)**

The title compound was synthesized using **21a** according to General Procedure 10 with AD-mix  $\alpha$ . Purification by flash chromatography (compound eluted in 0-1% methanol in DCM) and concentration *in vacuo* afforded the title compound white solid (14 mg, 0.032 mmol, 16% yield).

$^1H$ NMR (DMSO- $d_6$ , 400 MHz, contaminated w/ DCM)  $\delta$ : 8.76 (s, 1H), 8.27 (d,  $J$  = 9.0 Hz, 1H), 7.23 (d,  $J$  = 9.0 Hz, 1H), 7.21 (d,  $J$  = 8.0 Hz, 2H), 7.07 (d,  $J$  = 7.8 Hz, 2H), 5.04 (d,  $J$  = 4.8 Hz, 1H), 4.31 (dd,  $J$  = 5.0, 6.9 Hz, 1H), 4.15 (d,  $J$  = 6.1 Hz, 1H), 4.04 (s, 3H), 3.32-3.27 (m, 2H, partially obscured by water), 3.05-2.95 (m, 2H), 2.65-2.59 (m, 2H), 2.27 (s, 3H), 1.99-1.86 (m, 2H), 1.68-1.61 (m, 1H), 1.56-1.45 (m, 1H), 1.44-1.37 (m, 2H), 1.37-1.25 (m, 2H).  $^{13}C$ NMR (DMSO- $d_6$ , 100 MHz)  $\delta$ : 161.95, 156.82 (d,  $J$  = 254.2 Hz), 141.29, 140.93 (d,  $J$  = 7.1 Hz), 140.40, 138.08 (d,  $J$  = 1.4 Hz), 137.86 (d,  $J$  = 27.8), 135.37, 130.19 (d,  $J$  = 13.0 Hz), 127.95, 127.36, 115.25 (d,  $J$  = 2.5 Hz), 77.14, 73.29, 56.95 53.54, 53.45, 53.27, 37.27, 29.11, 25.38, 20.69 (overlapping signals). HRMS (ESI)  $m/z$  calc'd for  $C_{25}H_{31}FN_3O_3$   $[M+H]^+$ : 440.2344; found: 440.23389. UPLC: rt: 3.188 min, purity: 95.9%. Enantiomeric excess (ee) determined to be 43.3% by chiral HPLC (99/1 hexane/reagent alcohol).

**(1R,2S)-1-(2,3-dihydrobenzo[b][1,4]dioxin-6-yl)-2-(1-(2-(3-fluoro-6-methoxy-1,5-naphthyridin-4-yl)ethyl)piperidin-4-yl)ethane-1,2-diol (22b)**

The title compound was synthesized using **21b** according to General Procedure 10 with AD-mix  $\alpha$ . Purification by flash chromatography (compound eluted in 0-2% methanol in DCM) and concentration *in vacuo* afforded the title compound as a white solid (7 mg, 0.015 mmol, 11% yield).

$^1H$ NMR (DMSO- $d_6$ , 400 MHz; contaminated w/ DCM)  $\delta$ : 8.76 (s, 1H), 8.27 (d,  $J$  = 9.0 Hz, 1H), 7.23 (d,  $J$  = 9.0 Hz, 1H), 6.82 (d,  $J$  = 1.8 Hz, 1H), 6.77 (dd,  $J$  = 1.8, 8.3 Hz, 1H),

6.73 (d,  $J = 8.2$  Hz, 1H), 5.00 (d,  $J = 4.9$  Hz, 1H). 4.24-4.20 (m, 1H), 4.20 (s, 4H), 4.15 (d,  $J = 6.1$  Hz, 1H), 4.04 (s, 3H), 3.31-3.27 (m, 2H, obscured by water), 3.26-3.21 (m, 1H), 3.05-2.96 (m, 2H), 2.65-2.61 (m, 2H), 1.98-1.87 (m, 2H), 1.66-1.60 (m, 1H), 1.54-1.45 (m, 1H), 1.43-1.39 (m, 2H), 1.36-1.23 (m, 1H).  $^{13}\text{C}$ NMR (DMSO- $d_6$ , 100 MHz, contaminated w/ DMSO)  $\delta$ : 161.96, 156.84 (d,  $J = 254.0$  Hz), 142.50, 142.02, 140.94 (d,  $J = 7.1$  Hz), 140.41, 138.08 (d,  $J = 1.9$  Hz), 137.86 (d,  $J = 27.9$  Hz), 137.48, 130.21 (d,  $J = 13.0$  Hz), 120.26, 116.08, 115.81, 115.27 (d,  $J = 2.4$  Hz), 77.11, 72.94, 64.00, 56.95, 53.55, 53.46, 53.27, 37.27, 29.09, 25.36, 20.72. HRMS (ESI)  $m/z$  calc'd for  $\text{C}_{26}\text{H}_{31}\text{FN}_3\text{O}_5$   $[\text{M}+\text{H}]^+$ : 484.22342; found: 484.22305. UPLC: rt: 3.037 min, purity: 96.6%. Enantiomeric excess (ee) could not be determined due to peaks not resolving under standard conditions.

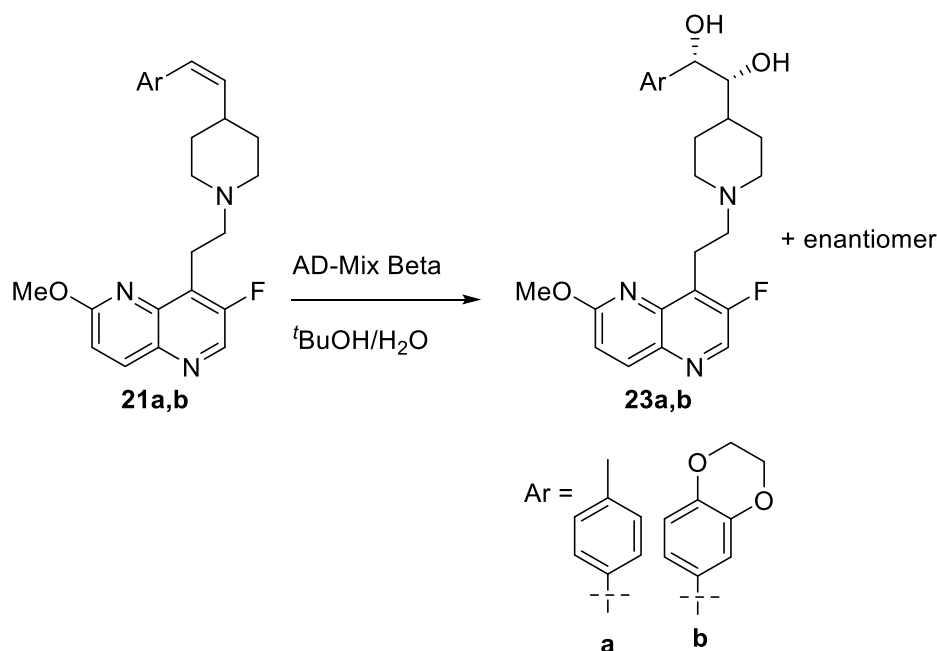

**(1*R*,2*S*)-1-(1-(2-(3-fluoro-6-methoxy-1,5-naphthyridin-4-yl)ethyl)piperidin-4-yl)-2-(p-tolylethyl)ethane-1,2-diol (23a)**

The title compound was synthesized using **21a** according to General Procedure 10 with AD-mix  $\beta$ . Purification by flash chromatography (compound eluted in ethyl acetate) and concentration *in vacuo* afforded the title compound (14 mg, 0.033 mmol, 87% yield).  $^1\text{H}$ NMR (DMSO- $d_6$ , 400 MHz)  $\delta$ : 8.76 (s, 1H), 8.27 (d,  $J = 9.0$  Hz, 1H), 7.25-7.19 (m, 3H), 7.07 (d,  $J = 7.9$  Hz, 2H), 5.03 (d,  $J = 4.9$  Hz, 1H), 4.31 (dd,  $J = 6.7, 5.1$  Hz, 1H), 4.15 (d,  $J = 6.1$  Hz, 1H), 4.04 (s, 3H), 3.31-3.25 (m, 3H, partially obscured by water), 3.00 (br t,  $J = 11.6$  Hz, 2H), 2.67-2.58 (m, 2H), 2.27 (s, 3H), 1.98-1.86 (m, 2H), 1.69-1.61 (m, 1H), 1.55-1.45 (m, 1H), 1.44-1.37 (m, 2H), 1.37-1.25 (m, 1H).  $^{13}\text{C}$ NMR (DMSO- $d_6$ , 100 MHz, contaminated with ethyl acetate)  $\delta$ : 161.95, 156.83 (d,  $J = 254.0$  Hz), 141.29, 140.93 (d,  $J = 7.0$  Hz), 140.40, 138.08 (d,  $J = 1.4$  Hz), 137.86 (d,  $J = 27.8$ ), 135.37, 130.20 (d,  $J = 13.0$  Hz), 127.95, 127.36, 115.26 (d,  $J = 1.8$  Hz), 77.14, 73.29, 56.95, 53.54, 53.45, 53.27, 37.27, 29.11, 25.38, 20.69 (overlapping signals). HRMS (ESI)  $m/z$  calc'd for  $\text{C}_{25}\text{H}_{31}\text{FN}_3\text{O}_3$   $[\text{M}+\text{H}]^+$ : 440.2344; found: 440.23337. UPLC: rt: 3.259 min, purity: 93.4%. Enantiomeric excess (ee) determined to be 62.0% by chiral HPLC (98/2 hexane/reagent alcohol).

**(1S,2R)-1-(2,3-dihydrobenzo[b][1,4]dioxin-6-yl)-2-(1-(2-(3-fluoro-6-methoxy-1,5-naphthyridin-4-yl)ethyl)piperidin-4-yl)ethane-1,2-diol (23b)**

The title compound was synthesized using **21b** according to General Procedure 10 with AD-mix  $\beta$ . Purification by flash chromatography (compound eluted in 0-2% methanol in DCM) and concentration *in vacuo* afforded the title compound as a white solid (8 mg, 0.016 mmol, 11% yield).

$^1\text{H}$ NMR (DMSO- $d_6$ , 400 MHz; contaminated w/ DMSO)  $\delta$ : 8.76 (s, 1H), 8.27 (d,  $J = 9.0$  Hz, 1H), 7.23 (d,  $J = 9.0$  Hz, 1H), 6.82 (d,  $J = 1.8$  Hz, 1H), 6.77 (dd,  $J = 1.8, 8.3$  Hz, 1H), 6.73 (d,  $J = 8.2$  Hz, 1H), 5.00 (d,  $J = 4.9$  Hz, 1H), 4.24-4.20 (m, 1H), 4.21 (s, 4H), 4.15 (d,  $J = 6.1$  Hz, 1H), 4.04 (s, 3H), 3.31-3.27 (m, 2H, obscured by water), 3.26-3.21 (m, 1H), 3.05-2.96 (m, 2H), 2.65-2.61 (m, 2H), 1.98-1.87 (m, 2H), 1.66-1.60 (m, 1H), 1.54-1.45 (m, 1H), 1.43-1.39 (m, 2H), 1.37-1.23 (m, 1H).  $^{13}\text{C}$ NMR (DMSO- $d_6$ , 100 MHz, contaminated w/ DMSO)  $\delta$ : 161.96, 156.84 (d,  $J = 254.0$  Hz), 142.50, 142.02, 140.94 (d,  $J = 7.1$  Hz), 140.41, 138.08 (d,  $J = 1.9$  Hz), 137.86 (d,  $J = 27.9$  Hz), 137.48, 130.21 (d,  $J = 13.0$  Hz), 120.26, 116.08, 115.81, 115.27 (d,  $J = 2.4$  Hz), 77.11, 72.94, 64.00, 56.95, 53.55, 53.46, 53.27, 37.27, 29.09, 25.36, 20.72 (overlapping signals). HRMS (ESI)  $m/z$  calc'd for  $\text{C}_{26}\text{H}_{31}\text{FN}_3\text{O}_5$   $[\text{M}+\text{H}]^+$ : 484.2248; found: 484.22342. UPLC: rt: 3.035 min, purity: 99%. Enantiomeric excess (ee) could not be determined due to peaks not resolving under standard conditions.

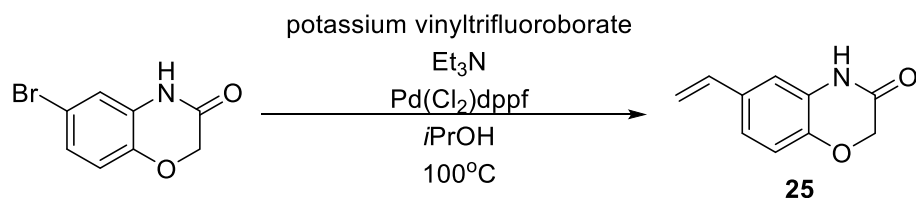

**6-vinyl-2H-benzo[b][1,4]oxazin-3(4H)-one (25)**

Commercially available 6-bromo-2H-benzo[b][1,4]oxazin-3(4H)-one (456 mg, 2 mmol, 1eq), triethylamine (0.558 mL, 4 mmol, 2 eq),  $\text{Pd}(\text{dppf})\text{Cl}_2$  (73 mg, 0.1 mmol, 0.05 eq), potassium vinyltrifluoroborate (402 mg, 3 mmol, 1.5 eq), and isopropanol (30 mL) were added to a pressure vial. Reaction was heated to  $100^\circ\text{C}$  overnight. Upon return, the reaction was cooled to room temperature and filtered through a celite plug, washing with excess ethyl acetate. Organics were dried over sodium sulfate, decanted, and concentrated by rotary evaporation to afford a crude mixture that was purified by flash chromatography. The title compound eluted in 0-10% ethyl acetate in hexanes, and concentration *in vacuo* afforded the title compound as a white solid (200 mg, 1.14 mmol, 57%). The reaction was run multiple times with an average yield of 65%.

$^1\text{H}$ NMR ( $\text{CDCl}_3$ , 400 MHz)  $\delta$ : 7.75 (s, 1H), 7.03 (dd,  $J = 1.9, 8.4$  Hz, 1H), 6.93 (d,  $J = 8.3$  Hz, 1H), 6.83 (d,  $J = 1.9$  Hz, 1H), 6.62 (dd,  $J = 10.8, 17.6$  Hz, 1H), 5.63 (dd,  $J = 0.6, 17.5$  Hz, 1H), 5.21 (dd,  $J = 0.5, 10.9$  Hz, 1H), 4.62 (s, 2H).

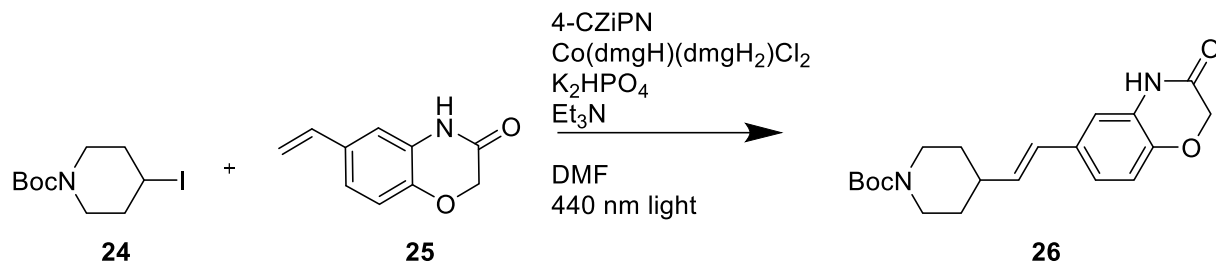

**tert-butyl (*E*)-4-(2-(3-oxo-3,4-dihydro-2H-benzo[b][1,4]oxazin-6-yl)vinyl)piperidine-1-carboxylate (**26**)**

The title compound was synthesized using commercially available **24** and **25** according to General Procedure 8. Purification by flash chromatography (compound eluted in 0-10% ethyl acetate in hexanes) and concentration *in vacuo* afforded the title compound as a yellow oil (750 mg, 2.09 mmol, 39% yield).

<sup>1</sup>HNMR (CDCl<sub>3</sub>, 400 MHz, contaminated w/ DCM and ethyl acetate) δ: 7.44 (s, 1H), 6.96 (dd, *J* = 1.8, 8.4 Hz, 1H), 6.91 (d, *J* = 8.3 Hz, 1H), 6.75 (d, *J* = 1.9 Hz, 1H), 6.28 (d, *J* = 16 Hz, 1H), 6.02 (dd, *J* = 6.9, 16 Hz, 1H), 4.60 (s, 2H), 4.18-4.06 (m, 2H), 2.82-2.73 (m, 2H), 2.32-2.22 (m, 1H), 1.77-1.70 (m, 2H), 1.47 (s, 9H), 1.42-1.31 (m, 2H).

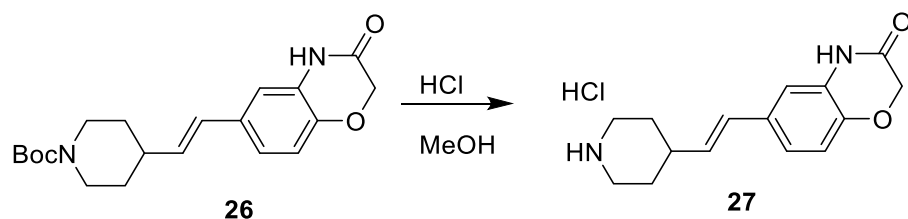

**(*E*)-6-(2-(piperidin-4-yl)vinyl)-2H-benzo[b][1,4]oxazin-3(4H)-one\*hydrogen chloride (**27**)**

The title compound was synthesized using **26** according to General Procedure 2 and used directly in the next step.

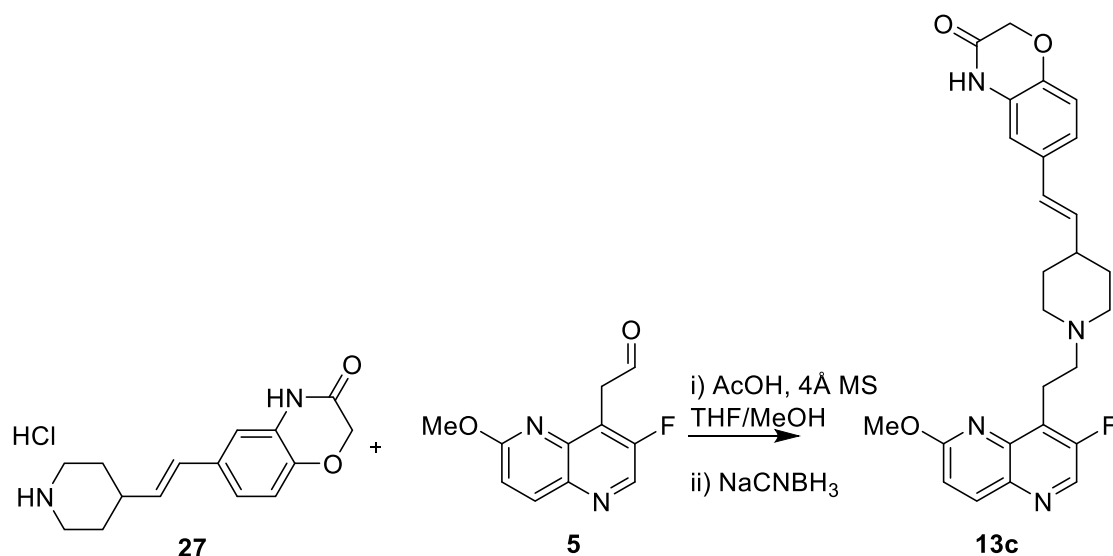

**(*E*)-6-(2-(1-(2-(3-fluoro-6-methoxy-1,5-naphthyridin-4-yl)ethyl)piperidin-4-yl)vinyl)-2H-benzo[b][1,4]oxazin-3(4H)-one (**13c**)**

The title compound was synthesized using **27** according to General Procedure 3. Purification by flash chromatography (compound eluted in 0-20% ethyl acetate in hexanes) and concentration *in vacuo* afforded the title compound as a yellow solid (66 mg, 0.143 mmol, 31% yield).

$^1\text{H}$ NMR ( $\text{CDCl}_3$ , 400 MHz)  $\delta$ : 8.62 (s, 1H), 8.18 (d,  $J = 9.0$  Hz, 1H), 7.84 (s, 1H), 7.07 (d,  $J = 9.0$  Hz, 1H), 6.96 (dd,  $J = 1.8, 8.3$  Hz, 1H), 6.90 (d,  $J = 8.3$  Hz, 1H), 6.77 (d,  $J = 1.8$  Hz, 1H), 6.28 (d,  $J = 15.9$  Hz, 1H), 6.05 (dd,  $J = 7.0, 15.9$  Hz, 1H), 4.60 (s, 2H), 4.09 (s, 3H), 3.44-3.40 (m, 2H), 3.13-3.11 (m, 2H), 2.77-2.74 (m, 2H), 2.19 (td,  $J = 2.1, 15.9$  Hz, 2H), 2.18-2.10 (m, 1H), 1.81-1.75 (m, 2H), 1.60-1.50 (obscured by water, m, 2H).

HRMS (ESI)  $m/z$  calc'd for  $\text{C}_{26}\text{H}_{28}\text{FN}_4\text{O}_3$   $[\text{M}+\text{H}]^+$ : 463.21400; found: 463.21280. UPLC: rt: 3.37 min, purity: 96.8%.

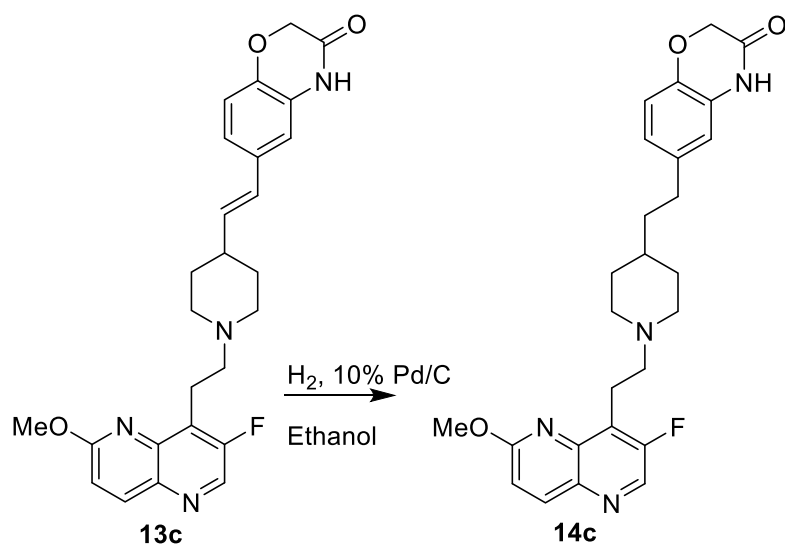

### 6-(2-(1-(2-(3-fluoro-6-methoxy-1,5-naphthyridin-4-yl)ethyl)piperidin-4-yl)ethyl)-2H-benzo[b][1,4]oxazin-3(4H)-one (**14c**)

The title compound was synthesized using **13c** according to General Procedure 8.

Purification by flash chromatography (compound eluted in DCM) and concentration *in vacuo* afforded the title compound off-white solid (3 mg, 0.006 mmol, 6% yield).

$^1\text{H}$ NMR ( $\text{CDCl}_3$ , 400 MHz)  $\delta$ : 8.61 (s, 1H), 8.17 (d,  $J = 9.0$  Hz, 1H), 7.99 (s, 1H), 7.07 (d,  $J = 9.0$  Hz, 1H), 6.89 (d,  $J = 8.2$  Hz, 1H), 6.79 (dd,  $J = 1.9, 8.2$  Hz, 1H), 6.60 (d,  $J = 1.9$  Hz, 1H), 4.59 (s, 2H), 4.08 (s, 3H), 3.43-3.38 (m, 2H), 3.11-3.05 (m, 2H), 2.76-2.70 (m, 2H), 2.59-2.53 (m, 2H), 2.13-2.05 (m, 2H), 1.78-1.71 (m, 2H), 1.57-1.50 (m, 2H), 1.37-1.25 (m, 3H).  $^{13}\text{C}$ NMR ( $\text{CDCl}_3$ , 100 MHz)  $\delta$ : 165.81, 162.54, 157.43 (d,  $J = 255.3$  Hz), 141.86, 141.79, 140.30, 138.67 (d,  $J = 2.1$  Hz), 138.07 (d,  $J = 28.1$  Hz), 137.76, 130.82 (d,  $J = 12.9$  Hz), 126.02, 124.09, 116.82, 115.66, 115.32 (d,  $J = 2.8$  Hz), 67.57, 57.64, 53.95, 53.81, 38.62, 35.48, 32.55, 32.52, 21.12. HRMS (ESI)  $m/z$  calc'd for

$\text{C}_{26}\text{H}_{30}\text{FN}_4\text{O}_3$   $[\text{M}+\text{H}]^+$ : 465.22965; found: 465.22867. UPLC: rt: 3.369 min, purity: 96.8%.



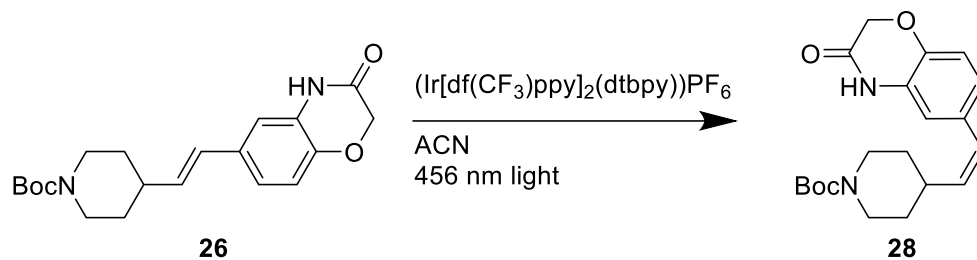

**tert-butyl (Z)-4-(2-(3-oxo-3,4-dihydro-2H-benzo[b][1,4]oxazin-6-yl)vinyl)piperidine-1-carboxylate (28)**

Compound **26** (1 g) was added to a round bottom flask and dissolved in acetonitrile (10 mL). [4,4'-Bis(1,1-dimethylethyl)-2,2'-bipyridine-N1,N1']bis[3,5-difluoro-2-[5-(trifluoromethyl)-2-pyridinyl-N]phenyl-C] Iridium(III) hexafluorophosphate was added (31 mg). The reaction was irradiated with 456 nm blue light, positioned 5-20 cm from the flask, overnight. Upon return, the reaction was stopped, and the solvent was removed by rotary evaporation. The crude product was purified by flash chromatography (compound eluted in 0-15% ethyl acetate in hexanes) and concentration *in vacuo* afforded the title compound as a yellow oil (340 mg, 0.949 mmol, 34% yield).

$^1\text{H}$ NMR ( $\text{CDCl}_3$ , 400 MHz, contaminated w/ DCM)  $\delta$ : 8.09 (s, 1H), 6.95 (d,  $J = 8.3$  Hz, 1H), 6.86 (dd,  $J = 1.8, 8.4$  Hz, 1H), 6.65 (d,  $J = 1.7$  Hz, 1H), 6.29 (d,  $J = 11.6$  Hz, 1H), 5.43 (dd,  $J = 10.0, 11.5$  Hz, 1H), 4.62 (s, 2H), 4.15-4.02 (m, 2H), 2.74 (t,  $J = 12.5$  Hz, 2H), 2.70-2.59 (m, 1H), 1.69-1.61 (m, 2H), 1.46 (s, 9H), 1.36 (qd,  $J = 4.3, 12.6$  Hz, 2H).

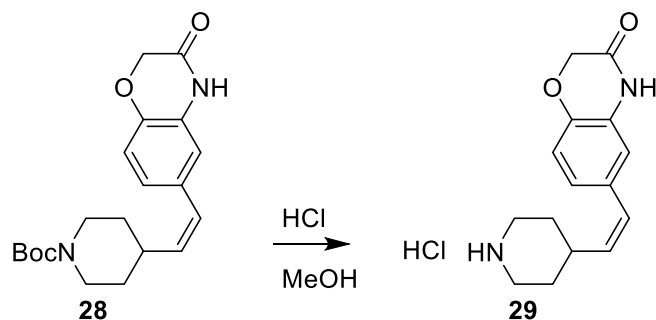

**(Z)-6-(2-(piperidin-4-yl)vinyl)-2H-benzo[b][1,4]oxazin-3(4H)-one\*hydrogen chloride (29)**

The title compound was synthesized using **28** according to General Procedure 2 and used directly in the next step.

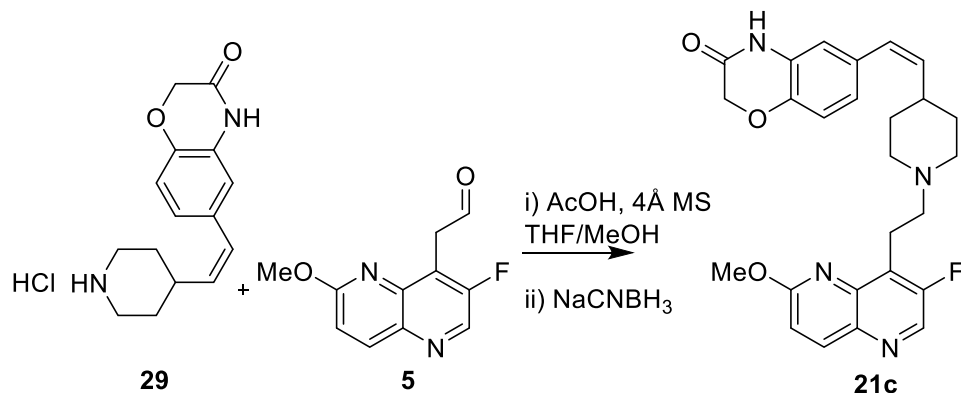

**(Z)-4-benzyl-6-(2-(1-(2-(3-fluoro-6-methoxy-1,5-naphthyridin-4-yl)ethyl)piperidin-4-yl)vinyl)-2H-benzo[b][1,4]oxazin-3(4H)-one (21c)**

The title compound was synthesized using **29** according to General Procedure 3. Purification by flash chromatography (compound eluted in 5-50% ethyl acetate in hexanes) and concentration *in vacuo* afforded the title compound as a yellow solid (20 mg, 0.043 mmol, 38% yield).

<sup>1</sup>HNMR (CDCl<sub>3</sub>, 400 MHz, contaminated w/ ethyl acetate) δ: 8.61 (s, 1H), 8.52 (s, 1H), 8.17 (d, *J* = 9.0 Hz, 1H), 7.07 (d, *J* = 9.0 Hz, 1H), 6.94 (d, *J* = 8.3 Hz, 1H), 6.87 (dd, *J* = 1.6, 8.3 Hz, 1H), 6.69 (d, *J* = 1.6 Hz, 1H), 6.27 (d, *J* = 11.6 Hz, 1H), 5.48 (dd, *J* = 10.1, 11.4 Hz, 1H), 4.62 (s, 2H), 4.07 (s, 3H), 3.43-3.37 (m, 2H), 3.10-3.04 (m, 2H), 2.75-2.71 (m, 2H), 2.58-2.47 (m, 1H), 2.17-2.11 (m, 2H), 1.73-1.69 (m, 2H), 1.59-1.49 (m, 2H).

<sup>13</sup>CNMR (CDCl<sub>3</sub>, 100 MHz) δ: 165.83, 162.54, 157.43 (d, *J* = 255.2 Hz), 142.49, 141.80 (d, *J* = 6.8 Hz), 140.29, 138.66 (d, *J* = 2.4 Hz), 138.04 (d, *J* = 28.0 Hz), 137.67, 132.81, 130.75 (d, *J* = 13.1 Hz), 126.83, 125.99, 124.56, 116.75, 115.98, 115.34 (d, *J* = 2.6 Hz), 67.48, 57.67, 53.94, 53.15, 35.21, 32.58, 21.10. HRMS (ESI) *m/z* calc'd for C<sub>26</sub>H<sub>28</sub>FN<sub>4</sub>O<sub>3</sub> [M+H]<sup>+</sup>: 463.21400; found: 463.21304. UPLC: rt: 3.38 min, purity: 97.7%.

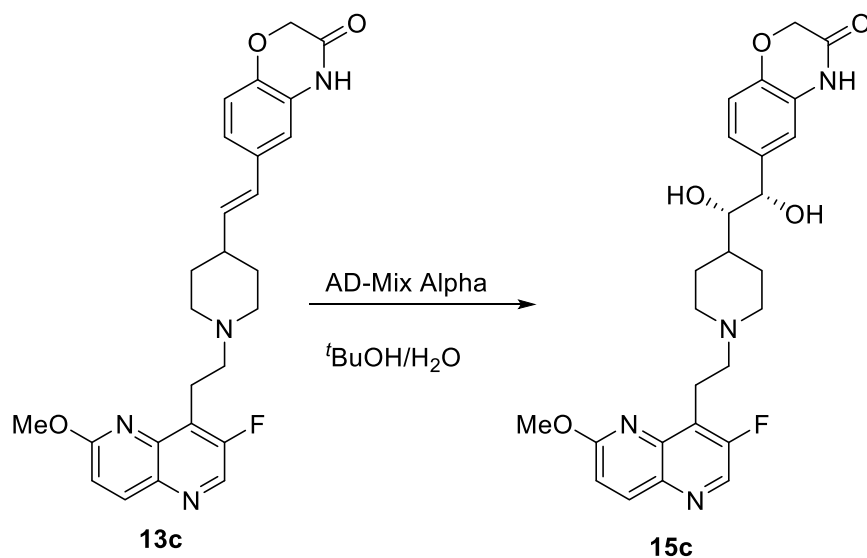

**6-((1*S*,2*S*)-2-(1-(2-(3-fluoro-6-methoxy-1,5-naphthyridin-4-yl)ethyl)piperidin-4-yl)-1,2-dihydroxyethyl)-2H-benzo[b][1,4]oxazin-3(4H)-one (15c)**

The title compound was synthesized using **13c** according to General Procedure 10 with AD-mix  $\alpha$ . Purification by flash chromatography (compound eluted in 0-5% methanol in DCM) and concentration *in vacuo* afforded the title compound as a white solid (11 mg, 0.022 mmol, 20% yield).

$^1\text{H}$ NMR (DMSO- $d_6$ , 400 MHz)  $\delta$ : 10.64 (s, 1H), 8.77 (s, 1H), 8.27 (d,  $J = 9.0$  Hz, 1H), 7.23 (d,  $J = 9.0$  Hz, 1H), 6.90 (m, 1H), 6.85 (m, 2H), 5.04 (d,  $J = 4.1$  Hz, 1H), 4.52 (s, 2H), 4.41 (t,  $J = 4.9$  Hz, 1H), 4.35-4.30 (m, 1H), 4.03 (s, 3H), 3.33-3.27 (m, 1H, obscured by water), 3.14 (q,  $J = 5.0$  Hz, 1H), 3.03-2.95 (m, 2H), 2.68-2.60 (m, 2H), 1.95-1.83 (m, 2H), 1.69-1.67 (m, 1H), 1.49-1.43 (m, 1H), 1.42-1.31 (m, 2H), 1.28-1.17 (m, 2H). HRMS (ESI)  $m/z$  calc'd for  $\text{C}_{26}\text{H}_{30}\text{FN}_4\text{O}_5$   $[\text{M}+\text{H}]^+$ : 497.21947; found: 497.2186. UPLC: rt: 2.915 min, purity: 95.8%. Enantiomeric excess (ee) determined to be 99% by chiral HPLC (90/10 hexane/reagent alcohol with 0.1% diethylamine as an additive).

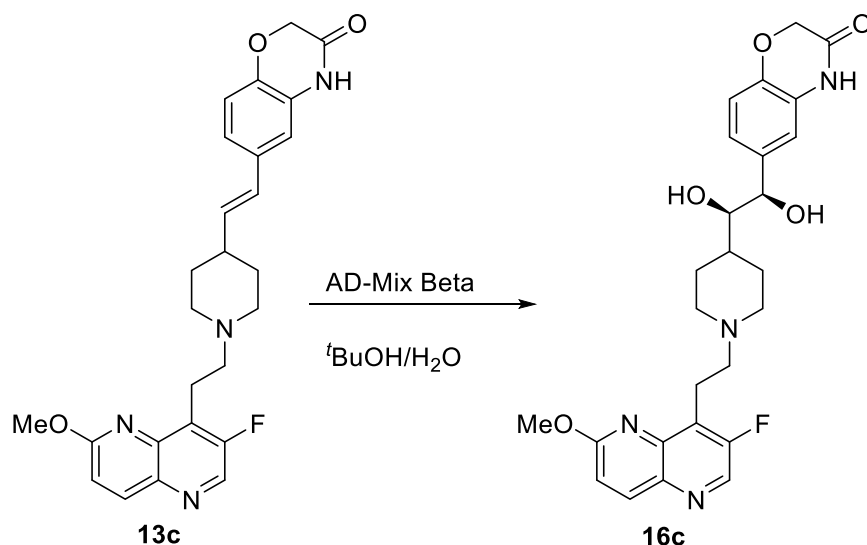

**6-((1*R*,2*R*)-2-(1-(2-(3-fluoro-6-methoxy-1,5-naphthyridin-4-yl)ethyl)piperidin-4-yl)-1,2-dihydroxyethyl)-2H-benzo[*b*][1,4]oxazin-3(4H)-one (16c)**

The title compound was synthesized using **13c** according to General Procedure 10 with AD-mix  $\beta$ . Purification by flash chromatography (compound eluted in 0-1% methanol in DCM) and concentration *in vacuo* afforded the title compound as a white solid (12 mg, 0.024 mmol, 22% yield).

$^1\text{H}$ NMR (DMSO- $d_6$ , 400 MHz)  $\delta$ : 10.63 (s, 1H), 8.77 (s, 1H), 8.28 (d,  $J = 9.0$  Hz, 1H), 7.24 (d,  $J = 9.0$  Hz, 1H), 6.90 (m, 1H), 6.85 (m, 2H), 5.02 (d,  $J = 4.8$  Hz, 1H), 4.53 (s, 2H), 4.41 (t,  $J = 4.8$  Hz, 1H), 4.31-4.30 (m, 1H), 4.03 (s, 3H), 3.33-3.26 (m, 2H, obscured by water), 3.15-3.11 (m, 1H), 2.98-2.95 (m, 2H), 2.63-2.59 (m, 2H), 1.90-1.82 (m, 2H), 1.68-1.65 (m, 1H), 1.46-1.34 (m, 2H), 1.27-1.19 (m, 2H).  $^{13}\text{C}$ NMR (DMSO- $d_6$ , 100 MHz)  $\delta$ : 164.93, 161.96, 156.82 (d,  $J = 254.1$  Hz), 141.98, 140.91 (d,  $J = 7.1$  Hz), 140.40, 138.20, 138.08 (d,  $J = 1.5$  Hz), 137.86 (d,  $J = 27.8$  Hz), 130.08 (d,  $J = 12.2$  Hz), 126.65, 121.30, 115.28 (overlapping signals), 114.28, 78.04, 72.71, 66.76, 56.80, 53.54, 53.12 (overlapping signals), 37.51, 29.00, 26.68, 20.61. HRMS (ESI)  $m/z$  calc'd for  $\text{C}_{26}\text{H}_{30}\text{FN}_4\text{O}_5$   $[\text{M}+\text{H}]^+$ : 497.21947; found: 497.21884. UPLC: rt: 2.917 min, purity: 95.6%.

Enantiomeric excess (ee) determined to be 99% by chiral HPLC (90/10 hexane/reagent alcohol with 0.1% diethylamine as an additive).

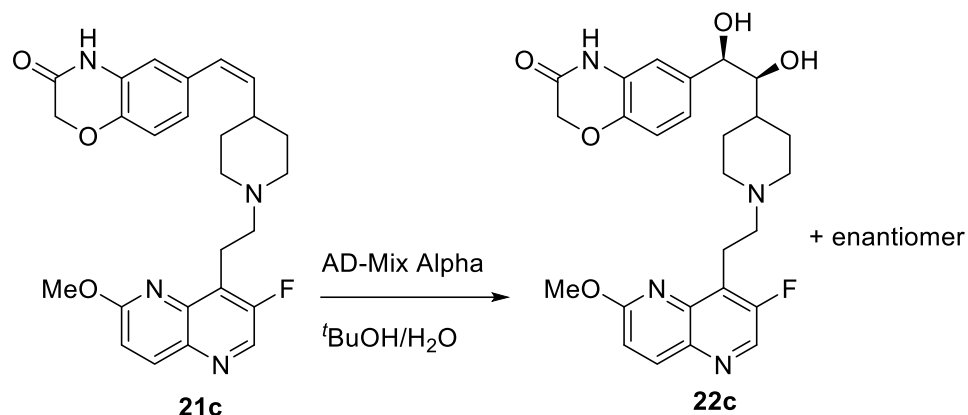

**6-((1*R*,2*S*)-2-(1-(2-(3-fluoro-6-methoxy-1,5-naphthyridin-4-yl)ethyl)piperidin-4-yl)-1,2-dihydroxyethyl)-2H-benzo[*b*][1,4]oxazin-3(4H)-one (22c)**

The title compound was synthesized using **21c** according to General Procedure 10 with AD-mix  $\alpha$ . Purification by flash chromatography (compound eluted in 0-1% methanol in DCM) and concentration *in vacuo* afforded the title compound as a white solid (20 mg, 0.040 mmol, 25% yield).

<sup>1</sup>HNMR (DMSO-*d*<sub>6</sub>, 400 MHz)  $\delta$ : 10.64 (s, 1H), 8.77 (s, 1H), 8.27 (d,  $J$  = 9.0 Hz, 1H), 7.23 (d,  $J$  = 9.0 Hz, 1H), 6.92 (d,  $J$  = 1.6 Hz, 1H), 6.87 (dd,  $J$  = 1.7, 8.3 Hz, 1H), 6.83 (d,  $J$  = 8.2 Hz, 1H), 5.13 (d,  $J$  = 4.4 Hz, 1H), 4.51 (s, 2H), 4.23 (dd,  $J$  = 4.4, 7.1 Hz, 2H), 4.04 (s, 3H), 3.34-3.28 (m, 2H, obscured by water), 3.26-3.20 (m, 1H), 3.08-2.96 (m, 2H), 2.68-2.60 (m, 2H), 2.10-1.89 (m, 2H), 1.69-1.62 (m, 1H), 1.62-1.52 (m, 1H), 1.51-1.28 (m, 3H). <sup>13</sup>CNMR (DMSO-*d*<sub>6</sub>, 100 MHz)  $\delta$ : 164.97, 161.95, 156.82 (d,  $J$  = 254.0 Hz), 141.96, 140.92 (d,  $J$  = 7.0 Hz), 140.40, 138.89, 138.07 (d,  $J$  = 1.2 Hz), 137.85 (d,  $J$  = 27.8 Hz), 130.18, 126.36, 122.08, 115.26 (d,  $J$  = 2.0 Hz), 114.99, 114.97, 77.07, 72.93, 66.77, 56.89, 53.54, 53.43, 53.24, 37.20, 29.08, 25.12, 20.67. HRMS (ESI)  $m/z$  calc'd for C<sub>26</sub>H<sub>30</sub>FN<sub>4</sub>O<sub>5</sub> [M+H]<sup>+</sup>: 497.21947; found: 497.21942. UPLC: rt: 2.866 min, purity: 94.3%. Enantiomeric excess (ee) determined to be 17.9% by chiral HPLC (90/10 hexane/reagent alcohol with 0.1% diethylamine as an additive).

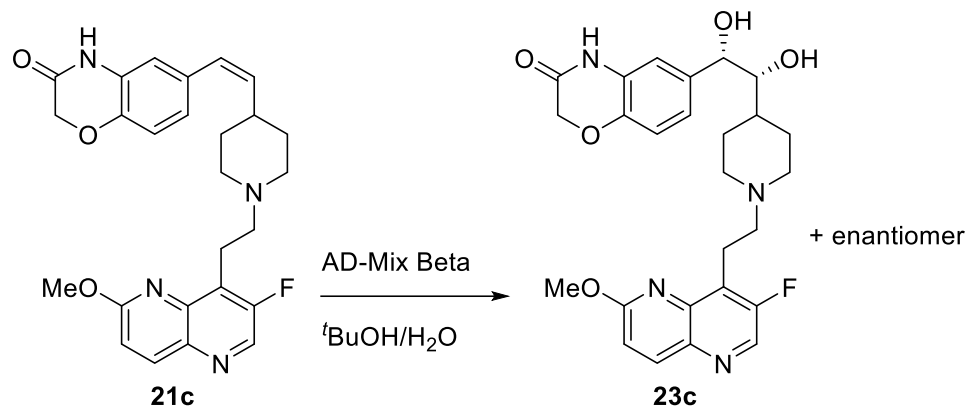

**6-((1*S*,2*R*)-2-(1-(2-(3-fluoro-6-methoxy-1,5-naphthyridin-4-yl)ethyl)piperidin-4-yl)-1,2-dihydroxyethyl)-2*H*-benzo[*b*][1,4]oxazin-3(4*H*)-one (23c)**

Title compound was synthesized using **21c** according to General Procedure 10 with AD-mix  $\beta$ . Purification by flash chromatography (compound eluted in 0-1% methanol in DCM) and concentration *in vacuo* afforded the title compound as a white solid (20 mg, 0.040 mmol, 25% yield).

$^1\text{H}$ NMR (DMSO- $d_6$ , 400 MHz)  $\delta$ : 10.64 (s, 1H), 8.77 (s, 1H), 8.27 (d,  $J = 9.0$  Hz, 1H), 7.23 (d,  $J = 9.0$  Hz, 1H), 6.92 (d,  $J = 1.6$  Hz, 1H), 6.87 (dd,  $J = 1.7, 8.3$  Hz, 1H), 6.83 (d,  $J = 8.2$  Hz, 1H), 5.13 (d,  $J = 4.4$  Hz, 1H), 4.51 (s, 2H), 4.23 (dd,  $J = 4.4, 7.1$  Hz, 2H), 4.04 (s, 3H), 3.34-3.28 (m, 2H, obscured by water), 3.26-3.20 (m, 1H), 3.11-2.99 (m, 2H), 2.74-2.60 (m, 2H), 2.10-1.89 (m, 2H), 1.69-1.62 (m, 1H), 1.62-1.52 (m, 1H), 1.51-1.29 (m, 3H).  $^{13}\text{C}$ NMR (DMSO- $d_6$ , 100 MHz)  $\delta$ : 164.97, 161.98, 156.81 (d,  $J = 254.2$  Hz), 141.97, 140.89 (d,  $J = 7.1$  Hz), 140.40, 138.88, 138.08 (d,  $J = 1.2$  Hz), 137.86 (d,  $J = 27.8$  Hz), expected 130 peak is lost in baseline noise, 126.37, 122.07, 115.28 (d,  $J = 1.8$  Hz), 114.98 (overlapping signals), 77.01, 72.94, 66.77, 56.75, 53.56, 53.34, 53.17, 37.09, 28.93, 24.99, 20.55. HRMS (ESI)  $m/z$  calc'd for  $\text{C}_{26}\text{H}_{30}\text{FN}_4\text{O}_5$   $[\text{M}+\text{H}]^+$ : 497.21947; found: 497.21863. UPLC: rt: 2.867 min, purity: 97.8%. Enantiomeric excess (ee) determined to be 14.0% by chiral HPLC (90/10 hexane/reagent alcohol with 0.1% diethylamine as an additive).

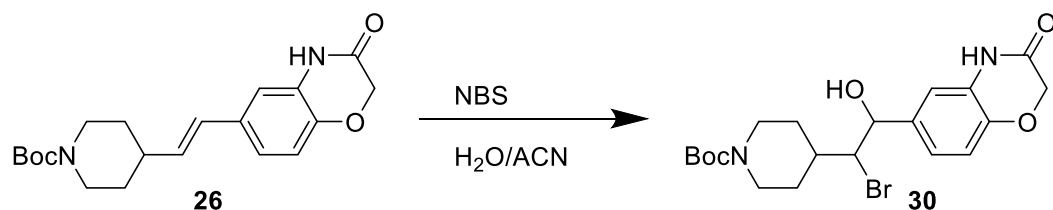

***tert*-butyl 4-(1-bromo-2-hydroxy-2-(3-oxo-3,4-dihydro-2*H*-benzo[*b*][1,4]oxazin-6-yl)ethyl)piperidine-1-carboxylate (30)**

Compound **26** (200 mg) was added to a round bottom flask and dissolved in acetonitrile (1 mL). Water (1 mL) was added, and the solution was sparged once with a nitrogen balloon. The reaction was cooled to 0°C and N-bromosuccinimide (120 mg) was added. The reaction was covered in foil and allowed to stir overnight. Upon return, reaction was quenched with aqueous, saturated sodium thiosulfate, whereupon it became yellow. The reaction was diluted with ethyl acetate and phases separated. The aqueous layer was extracted 5x5 mL ethyl acetate, and the combined organic layers were dried over

sodium sulfate, decanted, and concentrated by rotary evaporation to afford crude mixtures. Crude mixtures were then purified via flash chromatography (compound eluted in 5-40% ethyl acetate in hexanes) and concentration *in vacuo* afforded the title compound as a white solid (180 mg, 0.395 mmol, 71% yield).

<sup>1</sup>HNMR (CDCl<sub>3</sub>, 400 MHz, contaminated w/ ethyl acetate and DCM) δ: 7.67 (s, 1H), 7.04-6.89 (m, 2H), 6.87 (d, *J* = 1.4 Hz, 1H), 4.89 (dd, *J* = 3.3, 7.5 Hz, 1H), 4.66 (s, 2H), 4.18-4.14 (m, 2H, obscured by ethyl acetate), 2.78-2.66 (m, 2H), 2.25 (d, *J* = 3.3 Hz, 1H), 2.05-1.96 (m, 1H), 1.92-1.90 (m, 1H), 1.70-1.56 (m, 2H, obscured by water), 1.56-1.48 (m, 2H, obscured by water and next peak), 1.48 (s, 9H).

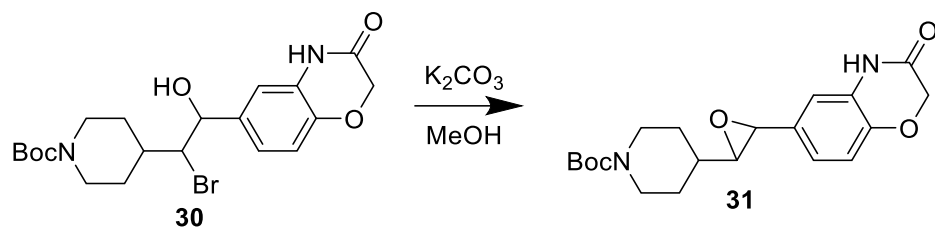

**tert-butyl 4-(3-(3-oxo-3,4-dihydro-2H-benzo[b][1,4]oxazin-6-yl)oxiran-2-yl)piperidine-1-carboxylate (31)**

Compound **30** (175 mg) was dissolved in methanol (2 mL). Potassium carbonate (107 mg) was added and allowed to stir until consumption of starting material was observed by TLC. Upon completion of reaction, reaction was quenched with saturated aqueous ammonium chloride and filtered through a celite plug, washing with ethyl acetate. After separation of phases, the organic layer was dried over sodium sulfate, decanted, and concentrated by rotary evaporation to afford desired epoxide, which was used without further purification. Title compound was afforded as a yellow solid (145 mg, 0.385 mmol, 100% yield).

<sup>1</sup>HNMR (CDCl<sub>3</sub>, 400 MHz, contaminated w/ ethyl acetate) δ: 6.96-6.85 (m, 2H), 6.62 (s, 1H), 4.59 (s, 2H), 4.21-4.07 (m, 2H, obscured by ethyl acetate), 3.63 (s, 1H), 2.78-2.65 (m, 3H), 1.89-1.80 (m, 1H), 1.73-1.65 (m, 1H), 1.59-1.50 (m, 1H), 1.46 (s, 9H), 1.42-1.28 (m, 4H, obscured by ethyl acetate).

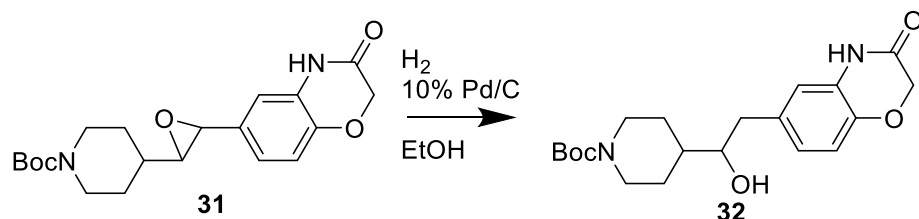

**tert-butyl 4-(1-hydroxy-2-(3-oxo-3,4-dihydro-2H-benzo[b][1,4]oxazin-6-yl)ethyl)piperidine-1-carboxylate (32)**

Compound **31** (144 mg) was dissolved in ethanol (2 mL), and 10% Pd/C (5 mg) was added. The reaction was sparged once with a nitrogen balloon and once with a hydrogen balloon. A hydrogen balloon was attached to reaction by needle through a septum, and the reaction was allowed to stir overnight. Upon return, reaction was sparged once with a nitrogen balloon, filtered through a celite plug, and washed with ethyl acetate. The solvent was removed by rotary evaporation to afford the crude

product as a white solid (140 mg, 0.372 mmol, 97% yield) which was used without additional purification.

$^1\text{H NMR}$  ( $\text{CDCl}_3$ , 400 MHz, contaminated w/ DCM)  $\delta$ : 6.93 (d,  $J = 8.2$  Hz, 1H), 6.84-6.80 (m, 1H), 6.67-6.64 (m, 1H), 4.61 (s, 2H), 4.23-4.12 (m, 2H), 3.59-3.51 (m, 1H), 2.85-2.77 (m, 1H), 2.73-2.61 (m, 2H), 2.57-2.48 (m, 1H), 1.89-1.81 (m, 1H), 1.71-1.64 (m, 1H), 1.60-1.51 (m, 1H), 1.46 (s, 9H), 1.43-1.27 (m, 4H).

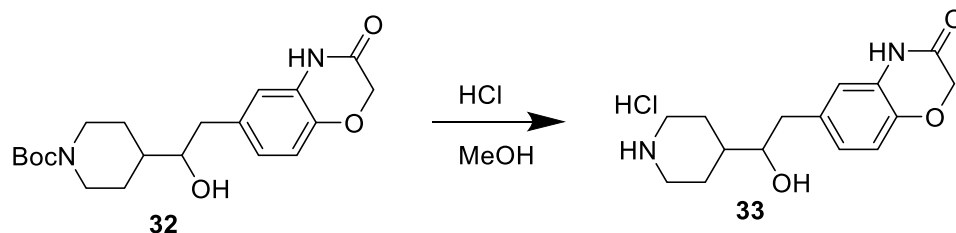

### 6-(2-hydroxy-2-(piperidin-4-yl)ethyl)-2H-benzo[b][1,4]oxazin-3(4H)-one hydrochloride (**33**)

The title compound was synthesized using **32** according to General Procedure 2 and used directly in the next step.

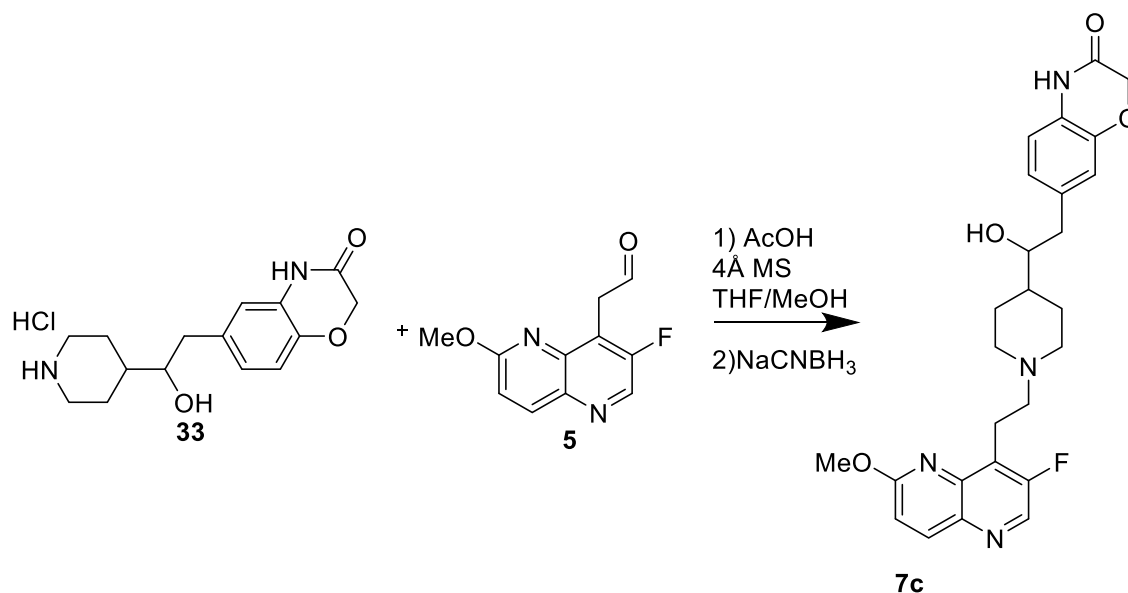

### 7-(2-(1-(2-(3-fluoro-6-methoxy-1,5-naphthyridin-4-yl)ethyl)piperidin-4-yl)-2-hydroxyethyl)-2H-benzo[b][1,4]oxazin-3(4H)-one (**7c**)

The title compound was synthesized using **33** according to General Procedure 3. Purification by flash chromatography (compound eluted in 0-1% methanol in DCM) and concentration *in vacuo* afforded the title compound as a white solid (7 mg, 0.015 mmol, 21% yield).

$^1\text{H NMR}$  ( $\text{DMSO-d}_6$ , 400 MHz, contaminated w/ DCM and DMSO)  $\delta$ : 8.62 (s, 1H), 8.17 (d,  $J = 9.0$  Hz, 1H), 7.43 (s, 1H), 7.07 (d,  $J = 9.0$  Hz, 1H), 6.93 (d,  $J = 8.2$  Hz, 1H), 6.83 (dd,  $J = 1.9, 8.2$  Hz, 1H), 6.65 (d,  $J = 1.8$  Hz, 1H), 4.60 (s, 2H), 4.09 (s, 3H), 3.60-3.54 (m, 1H), 3.45-3.39 (m, 2H), 3.21-3.12 (m, 2H), 2.84 (dd,  $J = 2.8, 13.8$  Hz, 1H), 2.78-2.71 (m, 2H), 2.52 (dd,  $J = 9.6, 13.8$  Hz, 1H), 2.16-2.06 (m, 2H), 1.93-1.87 (m, 1H), 1.77-1.71

(m, 1H), 1.56-1.40 (m, 4H, obscured by water). <sup>13</sup>CNMR (DMSO-d<sub>6</sub>, 100 MHz, contaminated w/ DMSO) δ: 165.00, 161.97, 156.83 (d, *J* = 254.0 Hz), 141.32, 140.92 (d, *J* = 7.1 Hz), 140.41, 138.08 (d, *J* = 1.8 Hz), 137.87 (d, *J* = 27.7 Hz), 134.30, expected 130 peak is lost in baseline noise, 126.70, 123.76, 116.66, 115.53, 115.28 (d, *J* = 1.7 Hz), 74.65, 66.77, 56.92, 56.85, 53.55, 53.16, 30.17, 28.53, 28.01, 26.66, 20.67. HRMS (ESI) *m/z* calc'd for C<sub>26</sub>H<sub>30</sub>FN<sub>4</sub>O<sub>4</sub> [M+H]<sup>+</sup>: 481.22456; found: 481.22397. UPLC: rt: 3.069 min, purity: 96.5%.

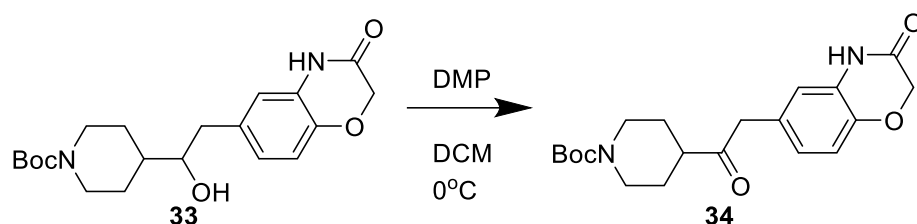

**tert-butyl 4-(2-(3-oxo-3,4-dihydro-2H-benzo[b][1,4]oxazin-6-yl)acetyl)piperidine-1-carboxylate (34)**

Compound **33** (105 mg) was dissolved in DCM (1.4 mL) and cooled to 0°C. Dess-Martin Periodinane (DMP, 142 mg) was added in one portion. The reaction began bubbling upon addition and was allowed to stir overnight. Upon return, reaction was diluted with water and 1M aqueous NaOH. After separation of phases, the aqueous layer was extracted 5x10 mL ethyl acetate. The combined organic layers were dried over sodium sulfate, decanted, and concentrated by rotary evaporation to afford the title compound as a clear oil (110 mg, 0.278 mmol, 100% yield).

<sup>1</sup>HNMR (CDCl<sub>3</sub>, 400 MHz, contaminated w/ ethyl acetate) δ: 7.77 (s, 1H), 6.93 (d, *J* = 8.2 Hz, 1H), 6.77 (dd, *J* = 2.0, 8.2 Hz, 1H), 6.62 (d, *J* = 2.0 Hz, 1H), 4.61 (s, 2H), 4.14-4.04 (m, 2H, obscured by ethyl acetate), 3.68 (s, 2H), 2.81-2.72 (m, 2H), 2.57 (tt, *J* = 3.8, 11.4 Hz, 1H), 1.84-1.75 (m, 2H), 1.61-1.50 (m, 2H, obscured by water), 1.46-1.43 (m, 9H).

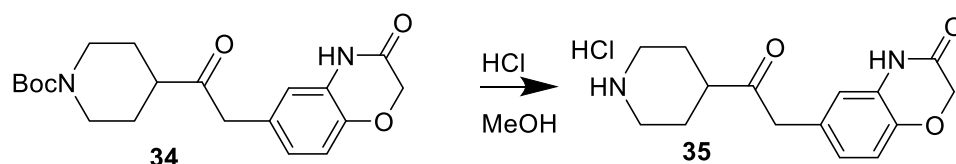

**6-(2-oxo-2-(piperidin-4-yl)ethyl)-2H-benzo[b][1,4]oxazin-3(4H)-one\*hydrochloride (35)**

The title compound was synthesized using **34** according to General Procedure 2 and used directly in the next step.



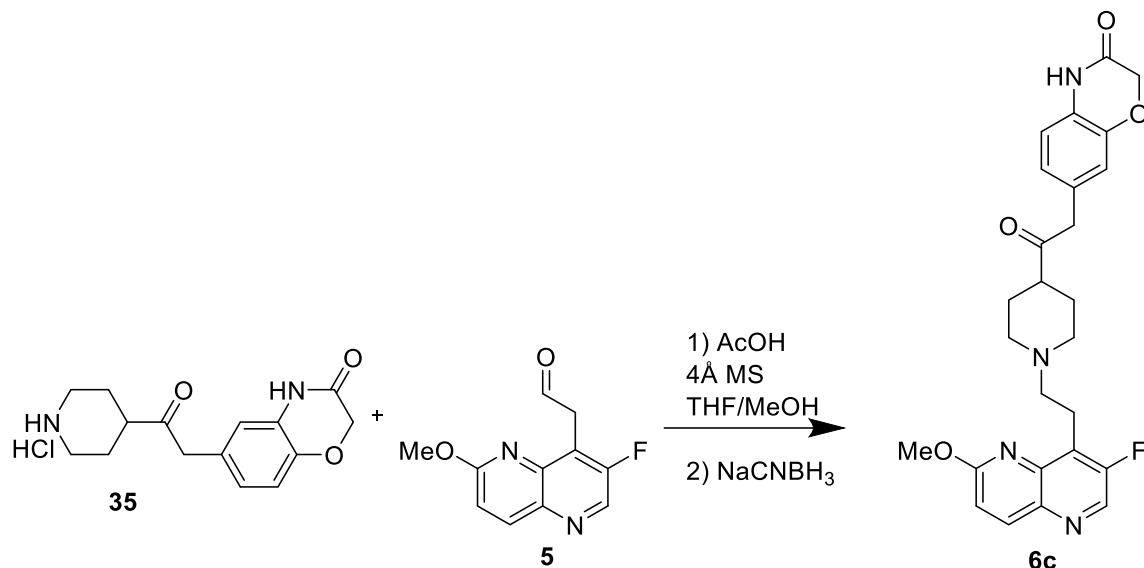

**4-benzyl-6-(2-(1-(2-(3-fluoro-6-methoxy-1,5-naphthyridin-4-yl)ethyl)piperidin-4-yl)-2-oxoethyl)-2H-benzo[b][1,4]oxazin-3(4H)-one (6c)**

The title compound was synthesized using **35** according to General Procedure 3. Purification by flash chromatography (compound eluted in 0-15% ethyl acetate in hexanes) and concentration *in vacuo* afforded the title compound as a yellow solid (50 mg, 0.104 mmol, 42% yield).

<sup>1</sup>HNMR (CDCl<sub>3</sub>, 400 MHz, contaminated with ethyl acetate) δ: 8.61 (s, 1H), 8.17 (d, *J* = 9.0 Hz, 1H), 8.11 (s, 1H), 7.07 (d, *J* = 9.0 Hz, 1H), 6.92 (d, *J* = 8.2 Hz, 1H), 6.77 (dd, *J* = 2.0, 8.2 Hz, 1H), 6.64 (d, *J* = 1.9 Hz, 1H), 4.60 (s, 2H), 4.08 (s, 3H), 3.68 (s, 2H), 3.49-3.83 (m, 2H), 3.18-3.07 (m, 2H), 2.86-2.73 (m, 2H), 2.53-2.39 (m, 1H), 2.29-2.12 (m, 2H), 1.96-1.70 (m, 4H). HRMS (ESI) *m/z* calc'd for C<sub>26</sub>H<sub>28</sub>FN<sub>4</sub>O<sub>4</sub> [M+H]<sup>+</sup>: 479.20891; found: 479.20773. UPLC: rt: 3.07 min, purity: 95.16%.

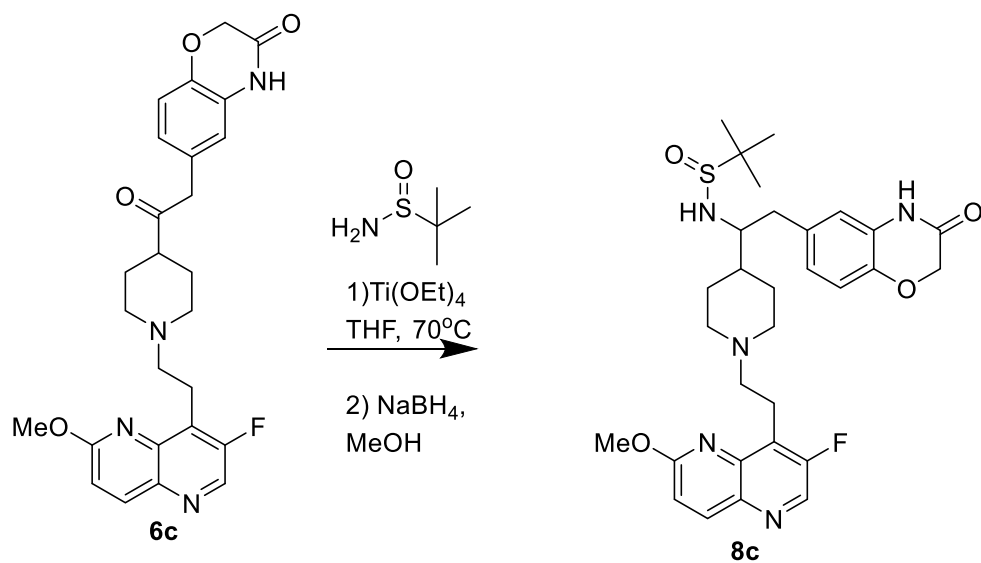

***N*-[1-(1-(2-(3-fluoro-6-methoxy-1,5-naphthyridin-4-yl)ethyl)piperidin-4-yl)-2-(3-oxo-3,4-dihydro-2H-benzo[*b*][1,4]oxazin-6-yl)ethyl)-2-methylpropane-2-sulfinamide (8c)**

The title compound was synthesized using **6c** according to General Procedure 5 and used directly in the next step.

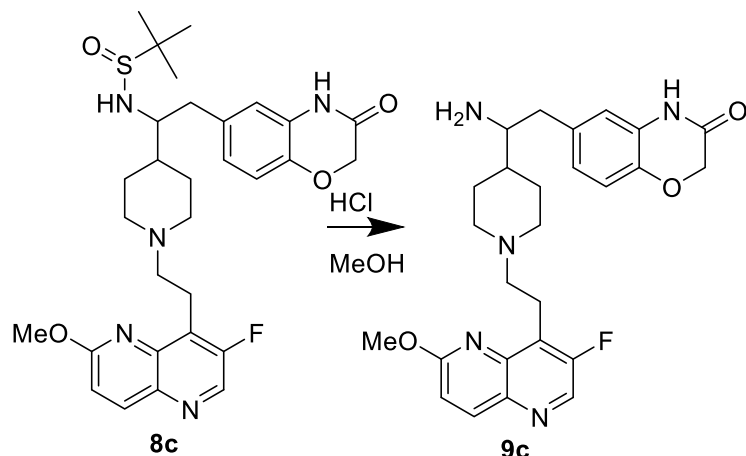

**6-(2-amino-2-(1-(2-(3-fluoro-6-methoxy-1,5-naphthyridin-4-yl)ethyl)piperidin-4-yl)ethyl)-2H-benzo[*b*][1,4]oxazin-3(4H)-one (9c)**

The title compound was synthesized using **8c** according to General Procedure 6. Purification by flash chromatography (compound eluted in 0-1% methanol in DCM) and concentration *in vacuo* afforded the title compound as a white solid (5 mg, 0.0104 mmol, 17% yield).

<sup>1</sup>HNMR (DMSO-*d*<sub>6</sub>, 400 MHz)  $\delta$ : 10.61 (s, 1H), 8.77 (s, 1H), 8.28 (d, *J* = 9.0 Hz, 1H), 7.24 (d, *J* = 9.0 Hz, 1H), 6.84 (d, *J* = 8.2 Hz, 1H), 6.74-6.70 (m, 2H), 4.51 (s, 2H), 4.04 (s, 3H), 3.33-3.26 (m, 2H, obscured by water), 3.06-2.99 (m, 2H), 2.68-2.54 (m, 4H), 2.24 (dd, *J* = 8.4, 12.9 Hz, 1H), 2.00-1.90 (m, 2H), 1.70-1.63 (m, 1H), 1.60-1.52 (m, 1H), 1.37-1.09 (m, 5H). HRMS (ESI) *m/z* calc'd for C<sub>26</sub>H<sub>31</sub>FN<sub>5</sub>O<sub>3</sub> [M+H]<sup>+</sup>: 480.24054; found: 480.24045. UPLC: rt: 2.600 min, purity: 97.9%.

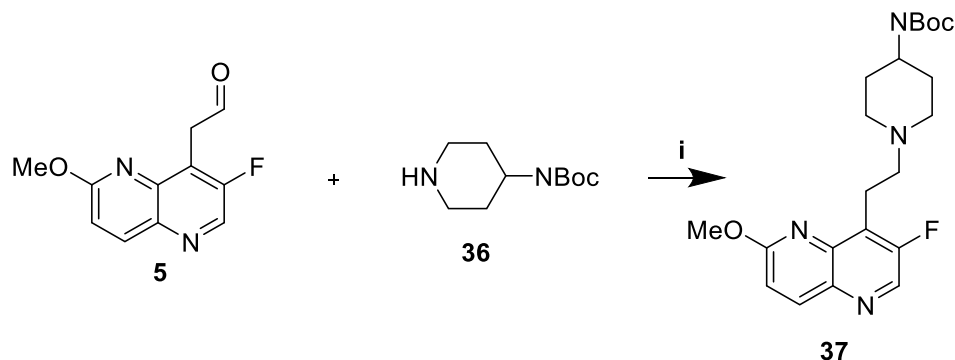

***tert*-butyl (1-(2-(3-fluoro-6-methoxy-1,5-naphthyridin-4-yl)ethyl)piperidin-4-yl)-λ<sup>2</sup>-azanecarboxylate (37)**

The title compound was synthesized using commercially available **36** according to General Procedure 3. Purification by flash chromatography (compound eluted in 5-40%

ethyl acetate in hexane) and concentration *in vacuo* afforded the title compound as a yellow solid (120 mg, 0.297 mmol, 65% yield).

<sup>1</sup>HNMR (CDCl<sub>3</sub>, 400 MHz, contaminated w/ ethyl acetate) δ: 8.61 (s, 1H), 8.17 (d, *J* = 9.0 Hz, 1H), 7.07 (d, *J* = 9.0 Hz, 1H), 4.47-4.38 (m, 1H), 4.07 (s, 3H), 3.54-3.44 (m, 1H), 3.43-3.35 (m, 2H), 3.06-2.94 (m, 2H), 2.78-2.69 (m, 2H), 2.31-2.20 (m, 2H), 2.00-1.91 (m, 2H), 1.44 (s, 9H).

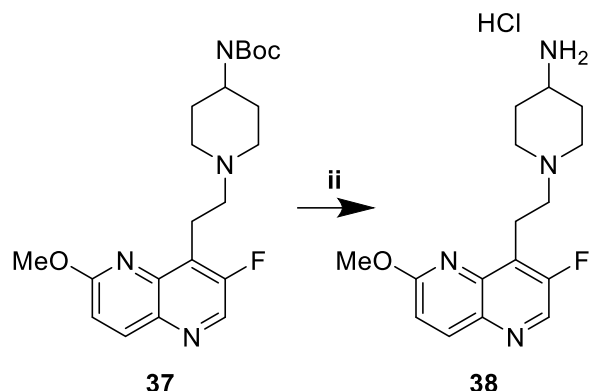

### 1-(2-(3-fluoro-6-methoxy-1,5-naphthyridin-4-yl)ethyl)piperidin-4-amine hydrochloride (**38**)

The title compound was synthesized using **37** according to General Procedure 2 and used directly in the next step.

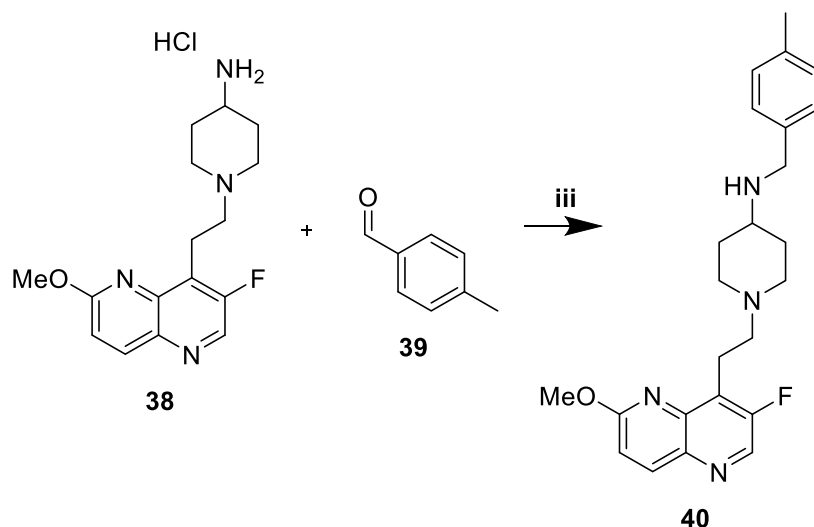

### 1-(2-(3-fluoro-6-methoxy-1,5-naphthyridin-4-yl)ethyl)-*N*-(4-methylbenzyl)piperidin-4-amine (**40**)

The title compound was synthesized using commercially available **39** according to General Procedure 3. Purification by flash chromatography (compound eluted in 0-1% methanol in DCM) and concentration *in vacuo* afforded the title compound as a white solid (20 mg, 0.0490 mmol, 20% yield).

<sup>1</sup>HNMR (CDCl<sub>3</sub>, 400 MHz) δ: 8.61 (s, 1H), 8.17 (d, *J* = 9.0 Hz, 1H), 7.22 (d, *J* = 7.9 Hz, 2H), 7.13 (d, *J* = 7.8 Hz, 2H), 7.07 (d, *J* = 9.0 Hz, 1H), 4.08 (s, 3H), 3.79 (s, 2H), 3.45-3.36 (m, 2H), 3.09-3.01 (m, 2H), 2.78-2.70 (m, 2H), 2.60-2.50 (m, 1H), 2.33 (s, 3H),

2.24-2.12 (m, 2H), 1.99-1.89 (m, 2H), 1.60-1.41 (m, partially obscured by water, 3H).  
<sup>13</sup>CNMR (CDCl<sub>3</sub>, 100 MHz) δ: 162.50, 157.41 (d, *J* = 255.3 Hz), 141.78 (d, *J* = 7.1 Hz),  
140.25, 138.61 (d, *J* = 2.0 Hz), 138.02 (d, *J* = 28.2 Hz), 137.75, 136.57, 130.76 (d, *J* =  
13.0 Hz), 129.22, 128.13, 115.29 (d, *J* = 2.7 Hz), 57.24, 54.12, 53.92, 52.30, 50.60,  
32.87, 21.20 (overlapping signals). HRMS (ESI) *m/z* calc'd for C<sub>24</sub>H<sub>30</sub>FN<sub>4</sub>O [M+H]<sup>+</sup>:  
409.23982; found: 409.23935. UPLC: rt: 2.669 min, purity: 97.02%.

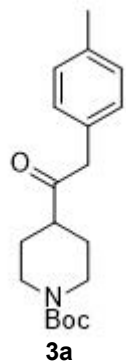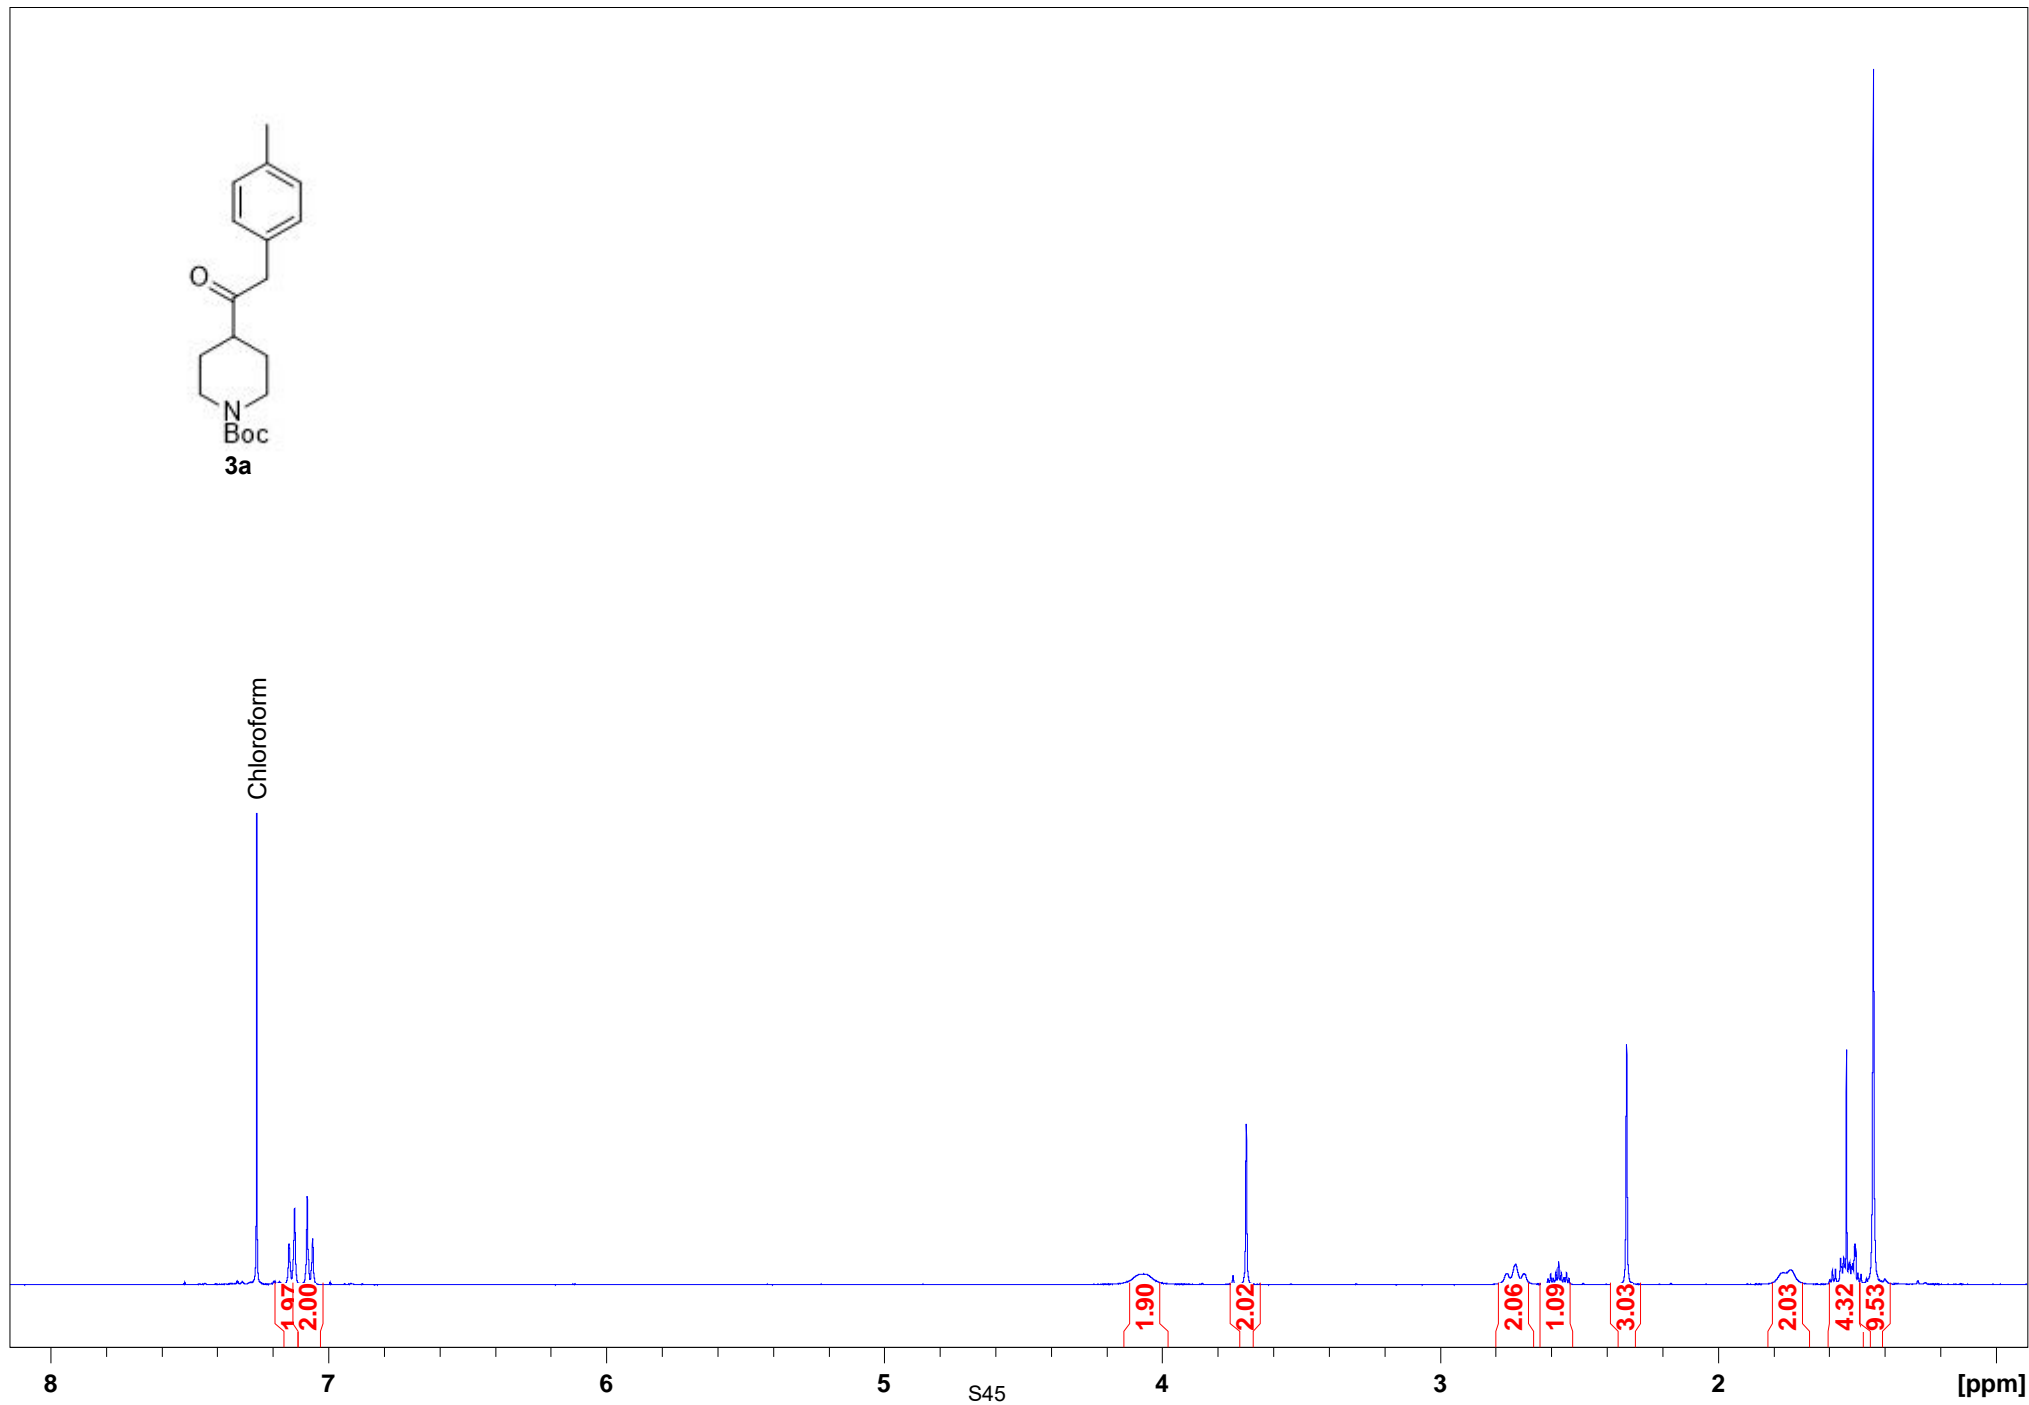

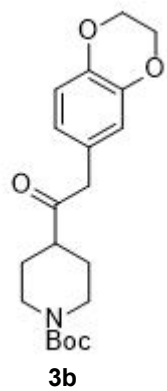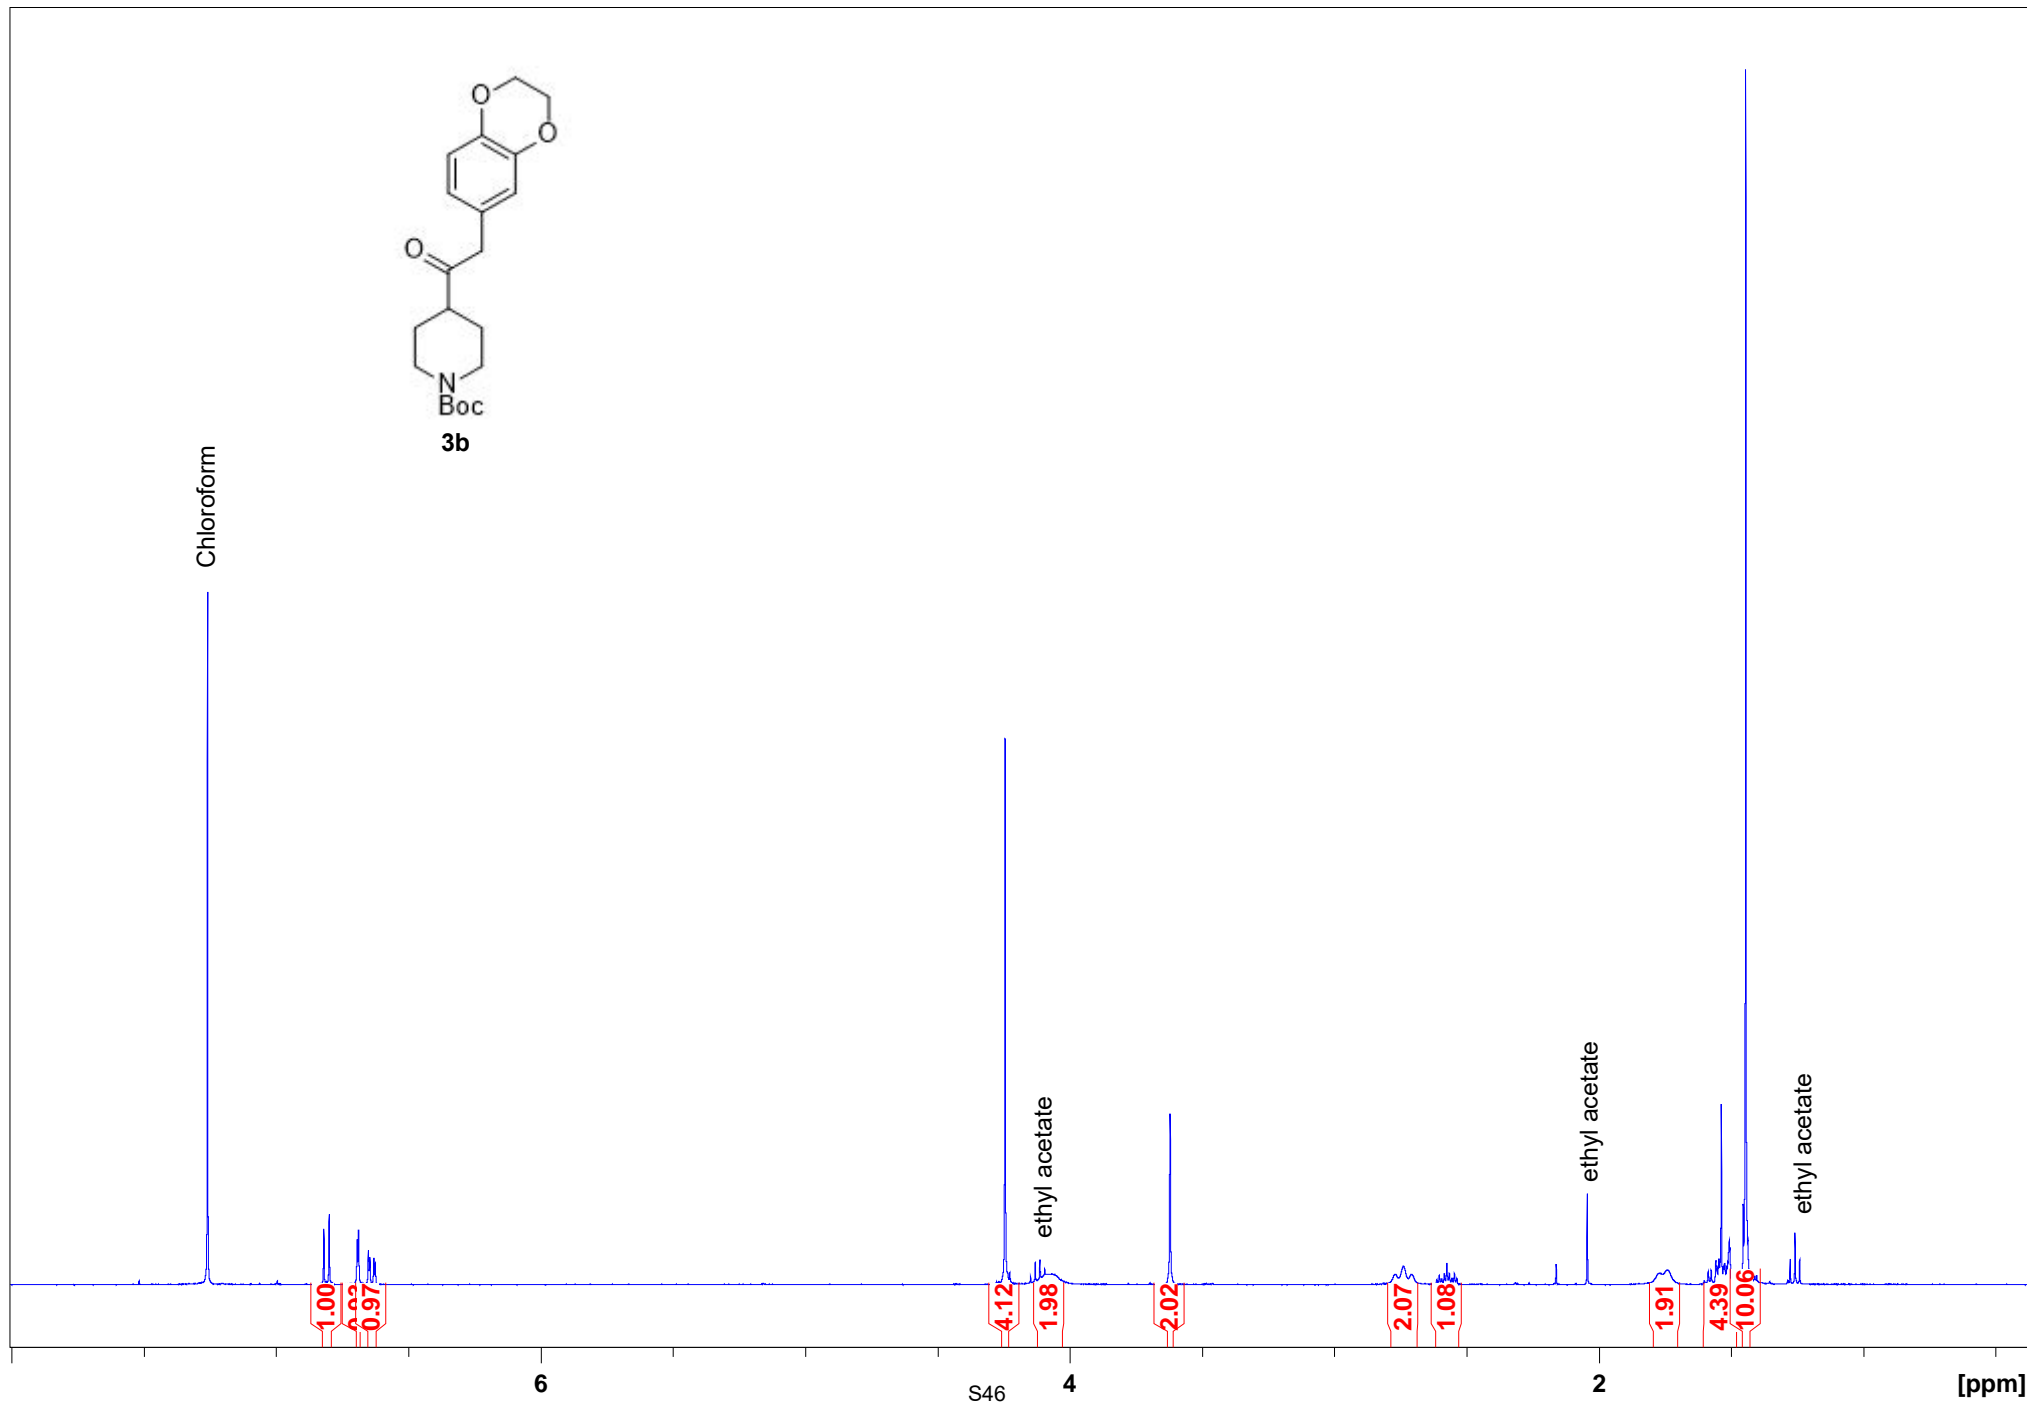

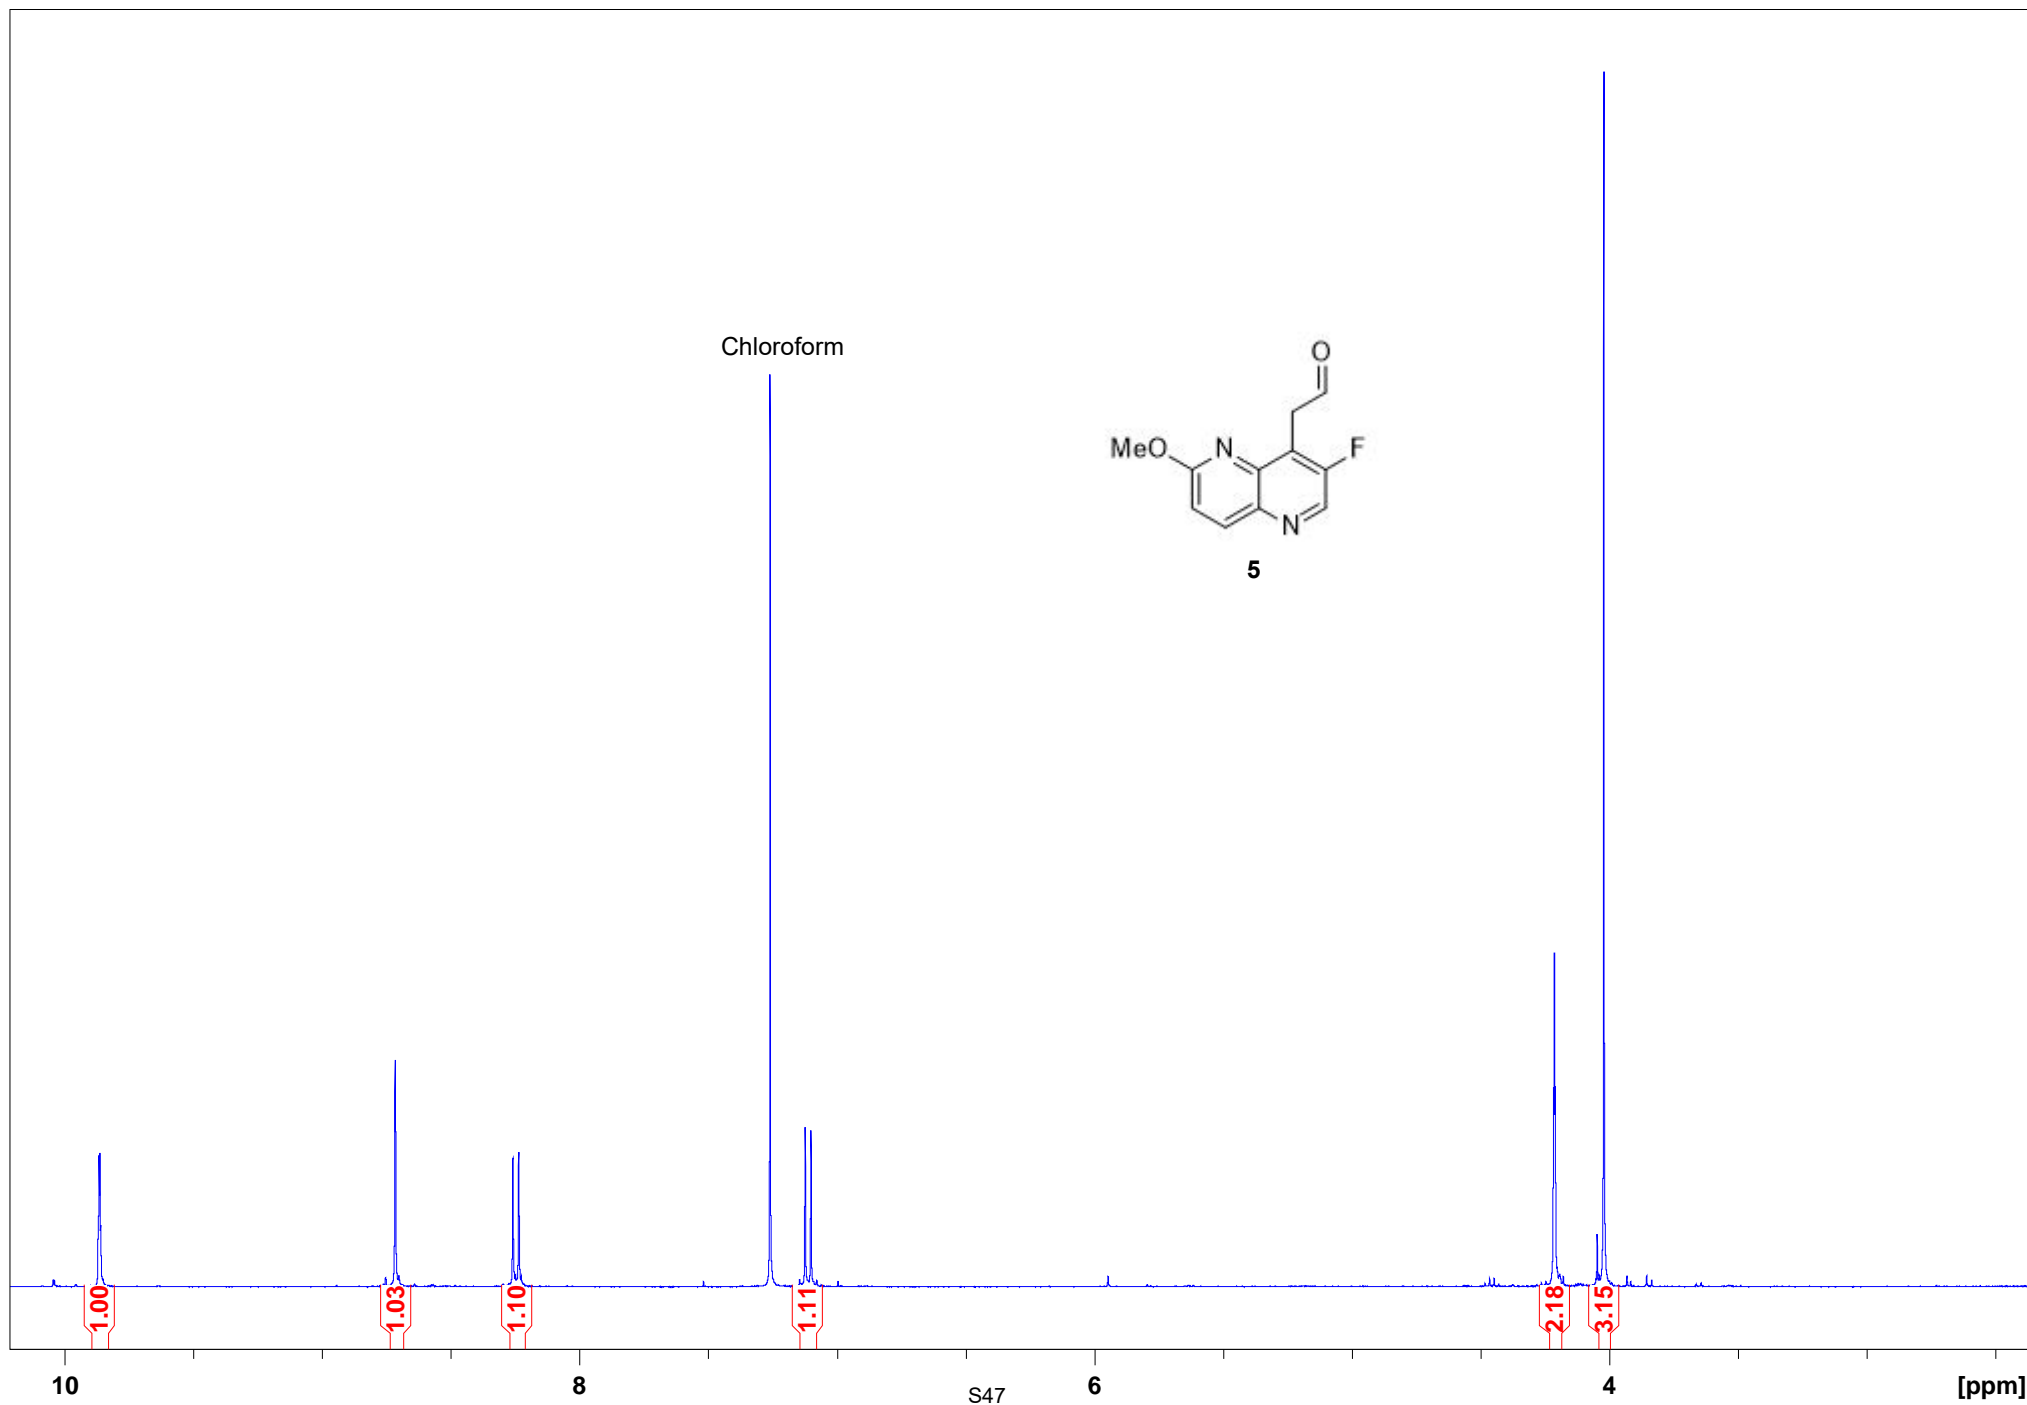

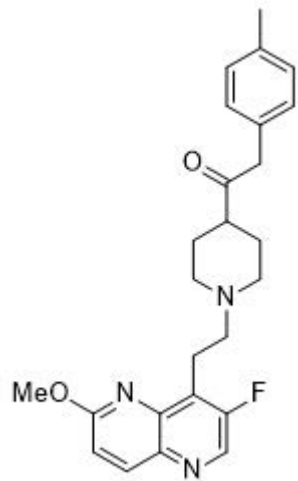

6a

Chloroform

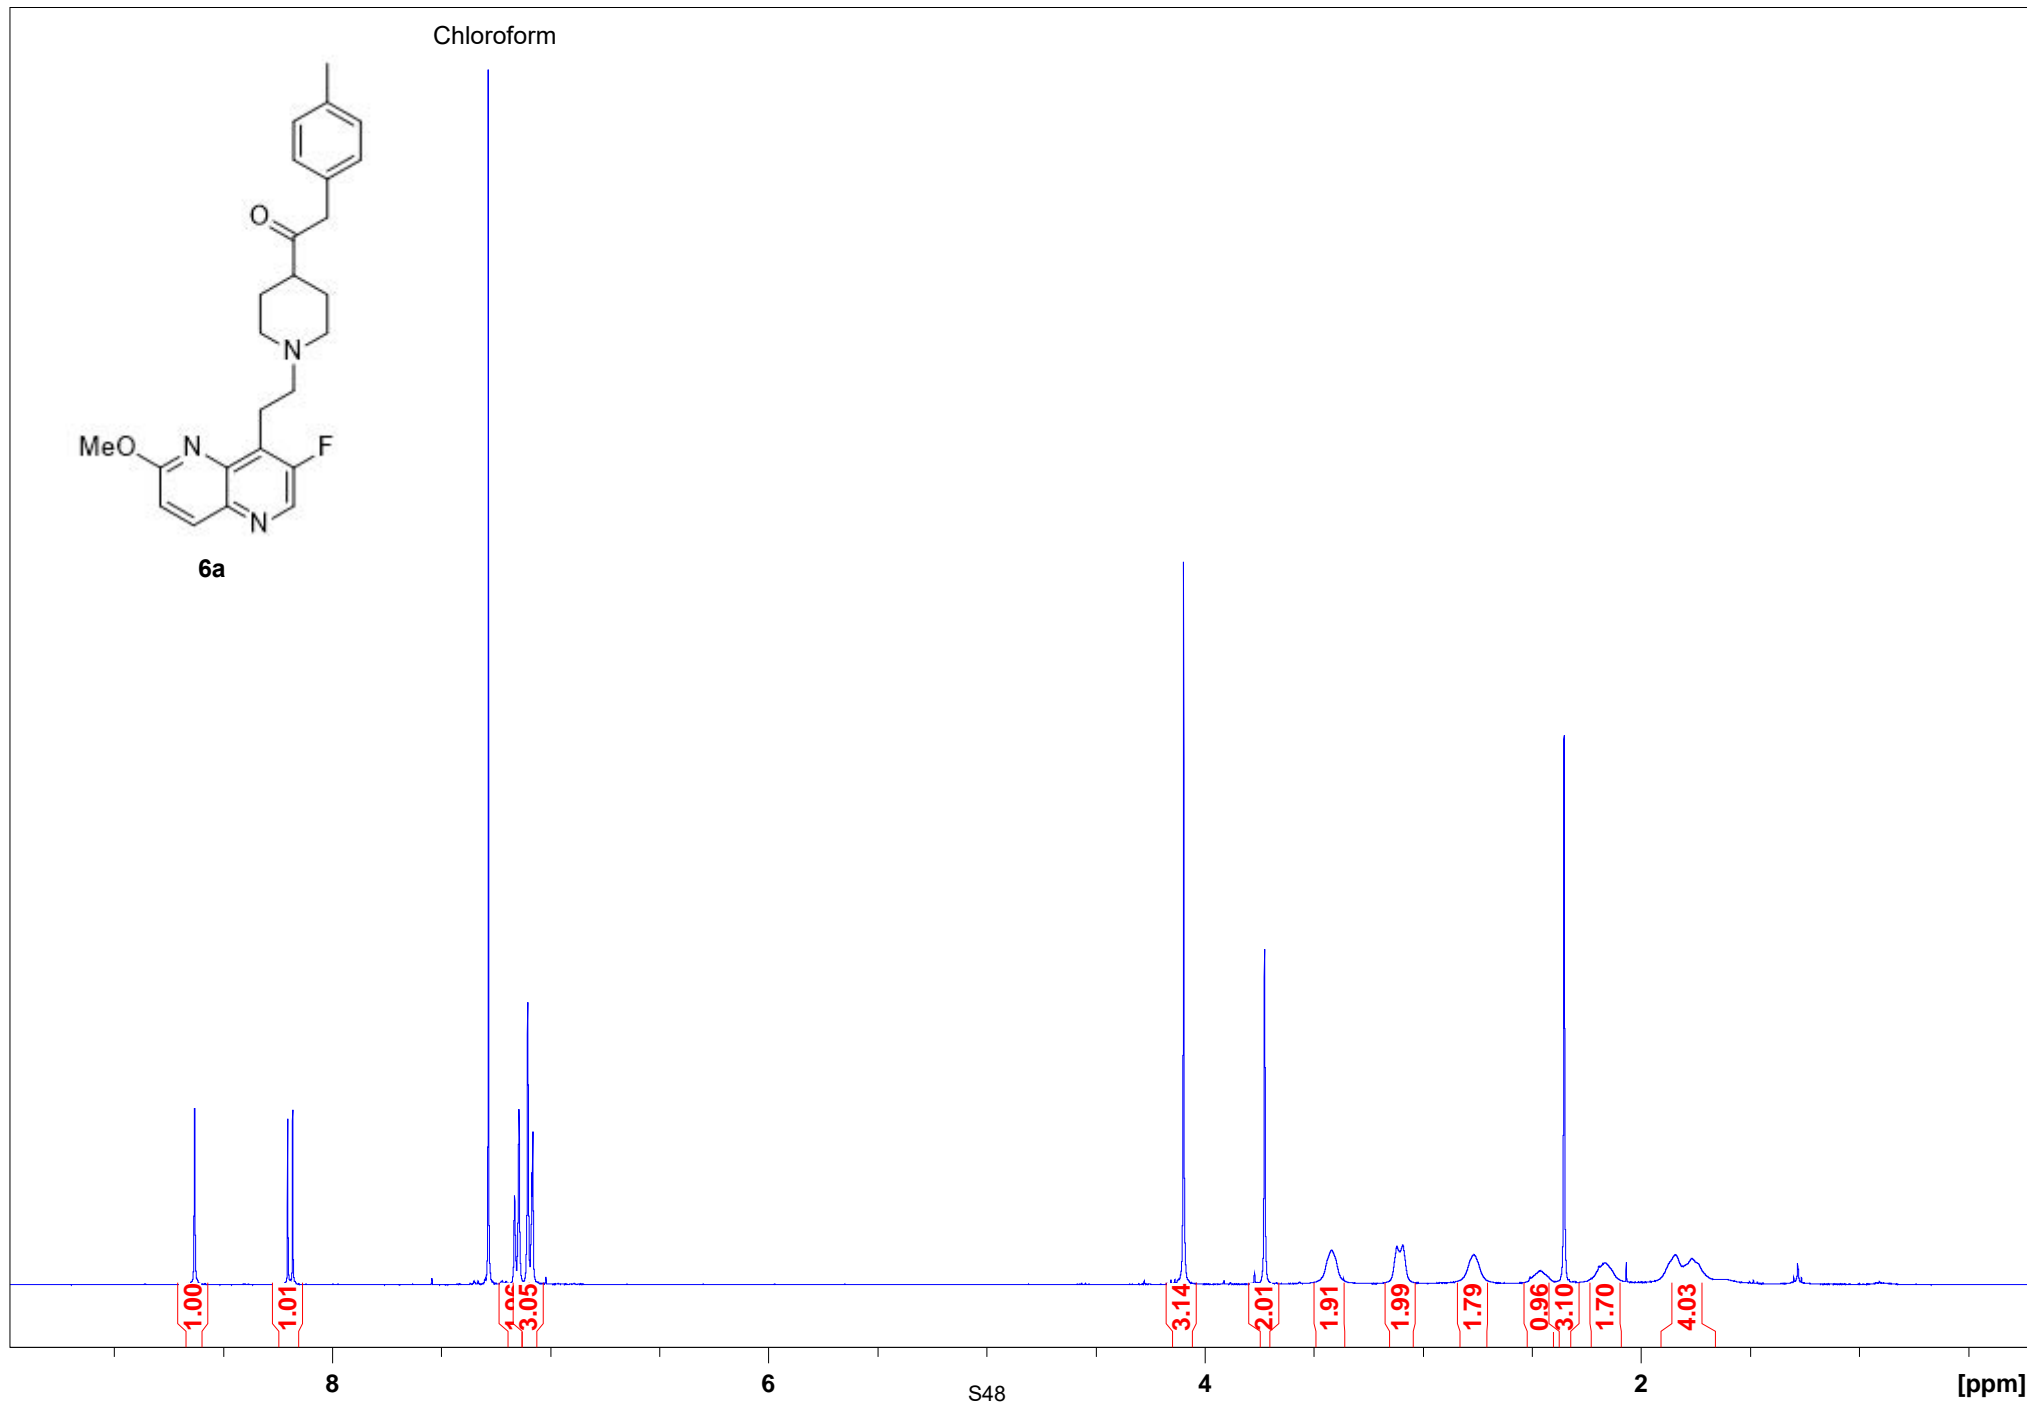



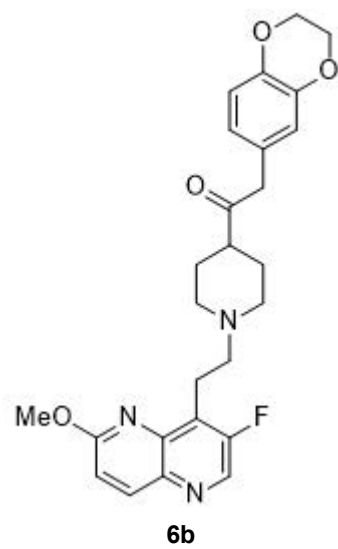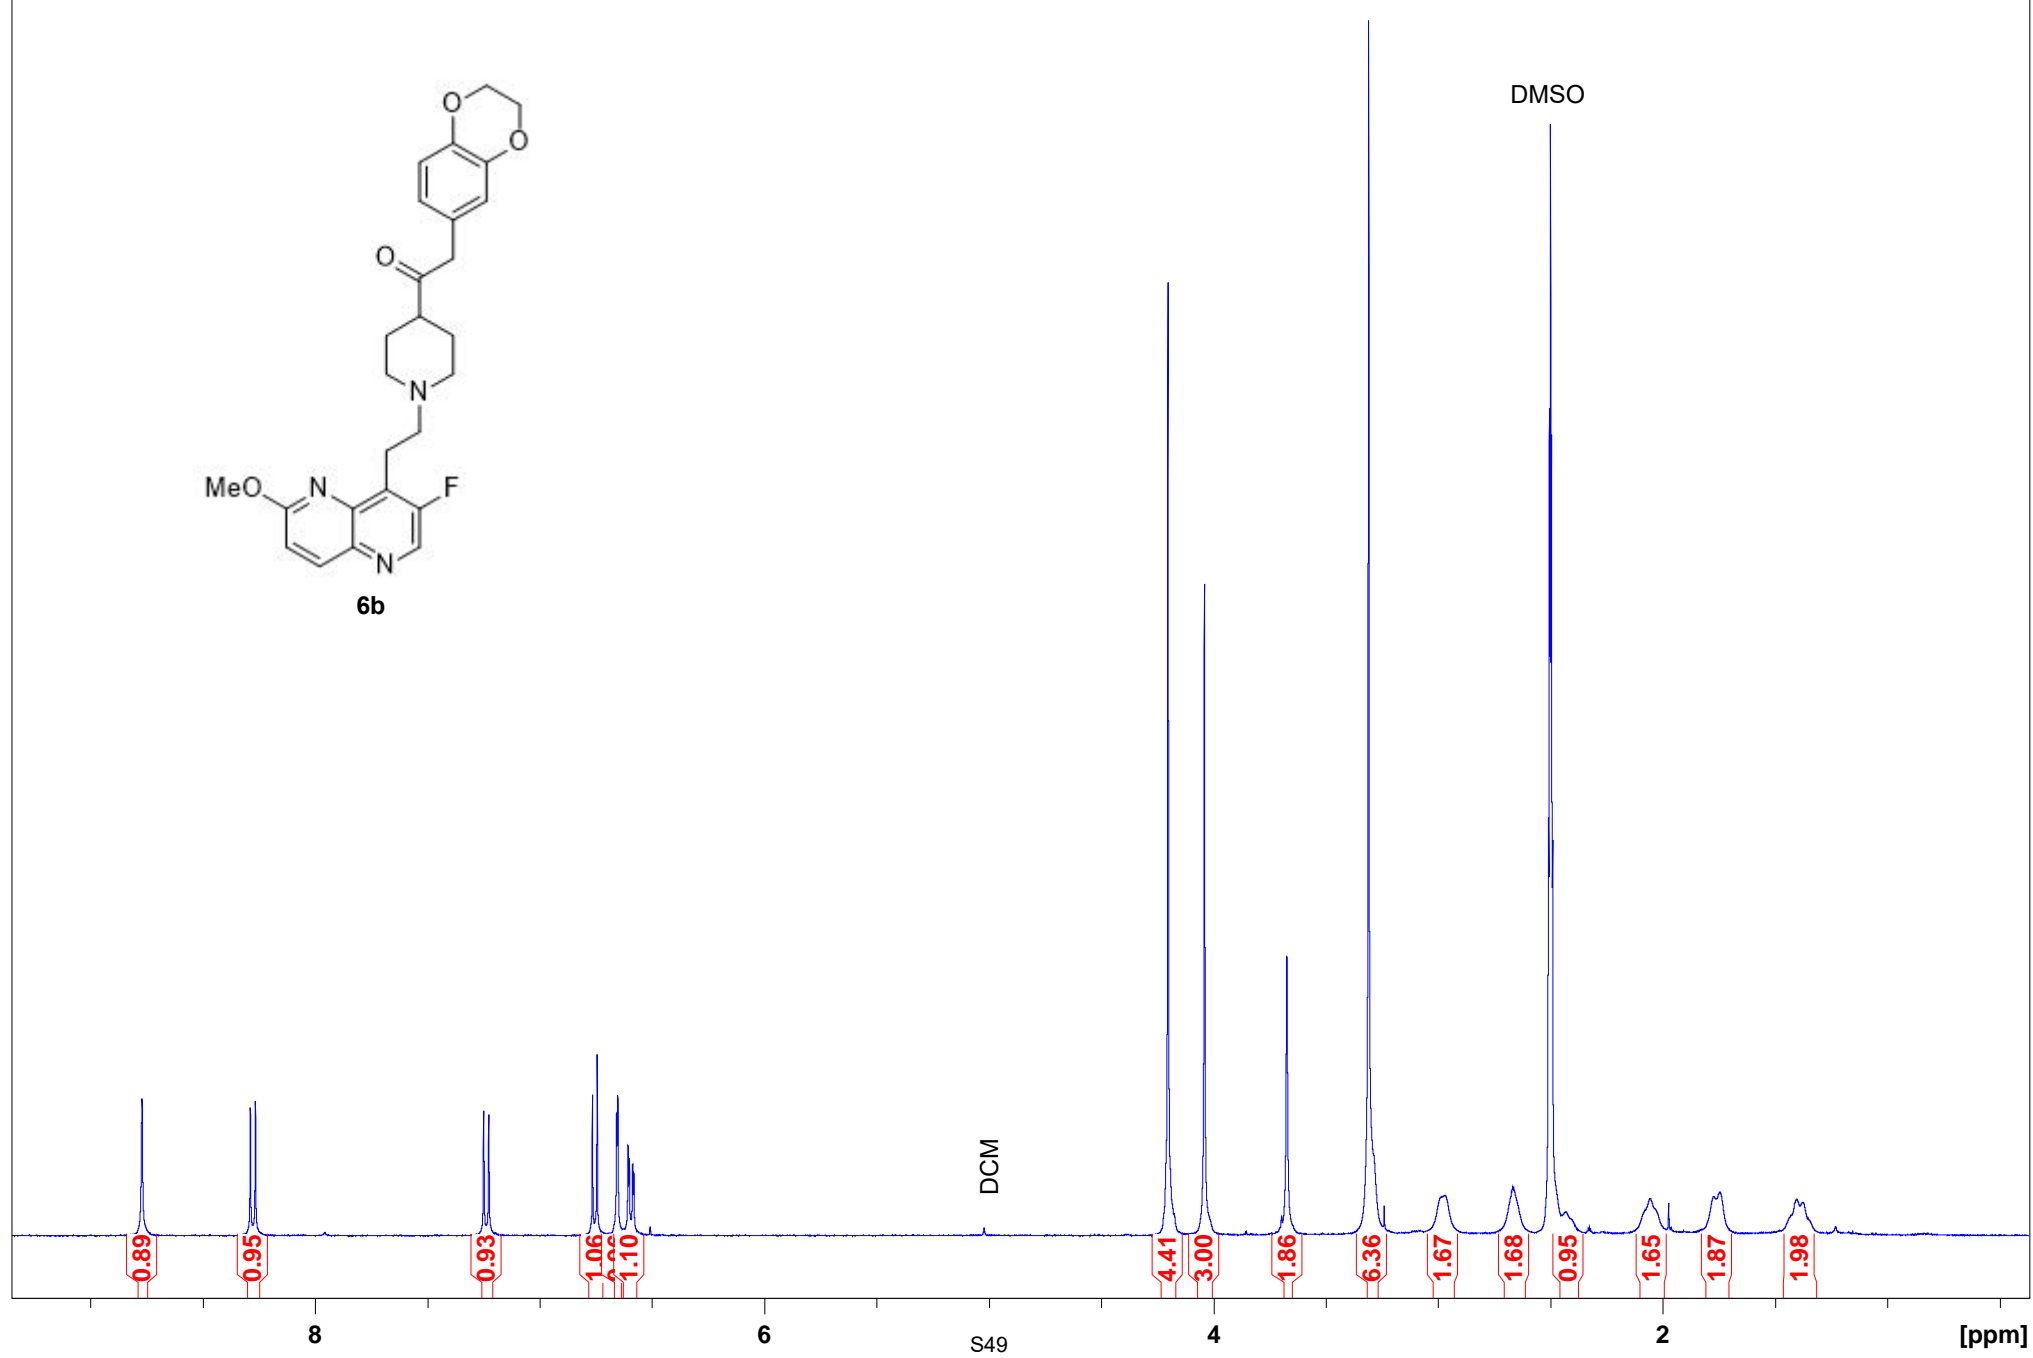

DMSO

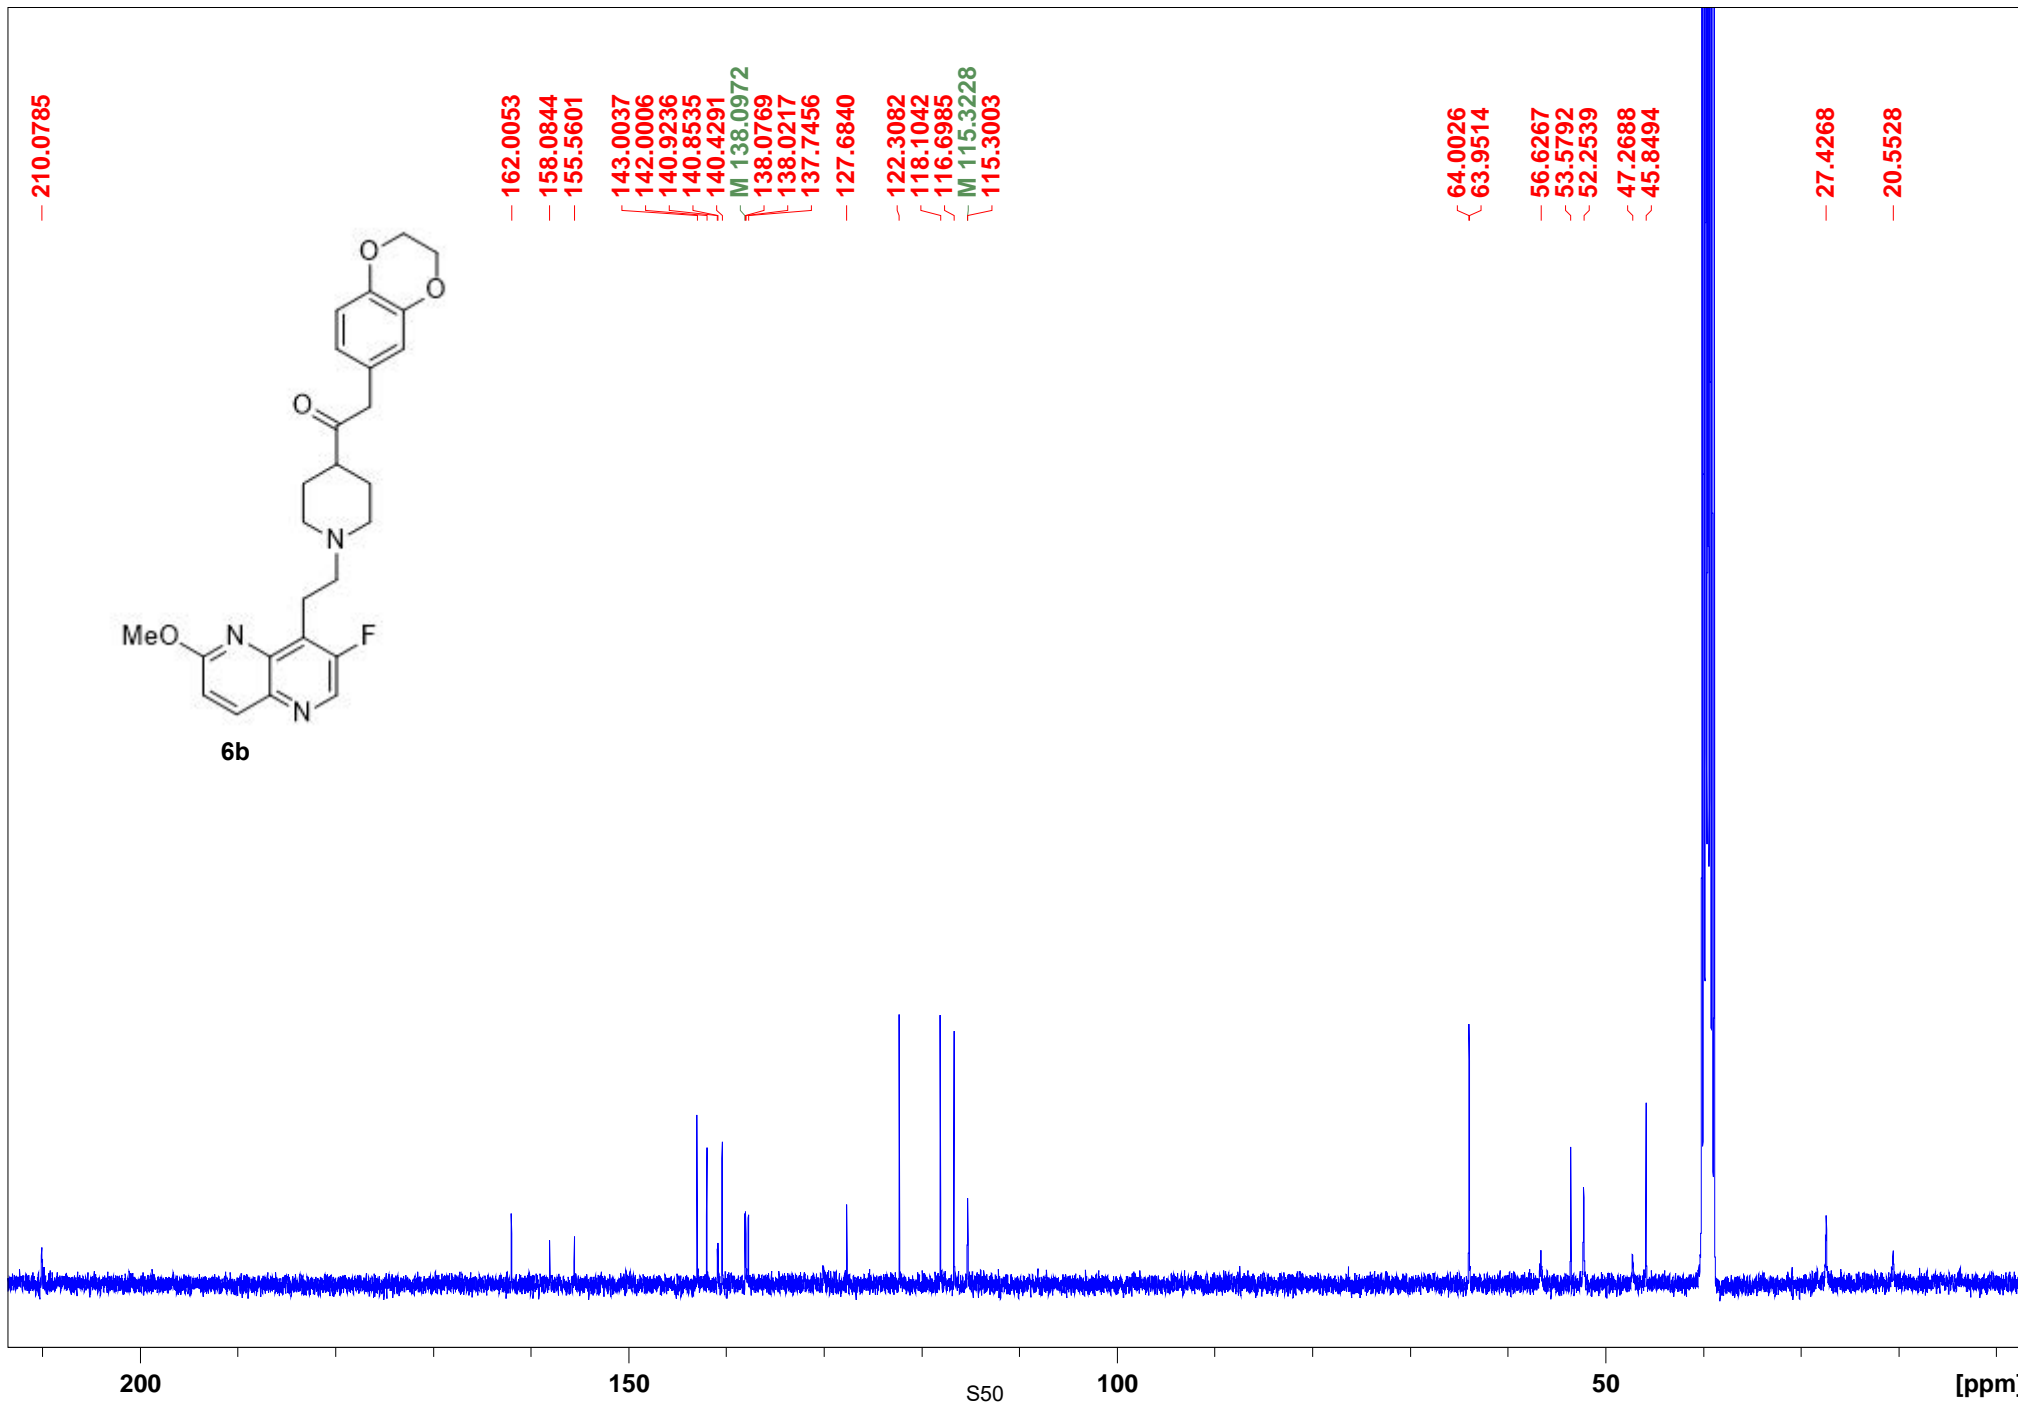

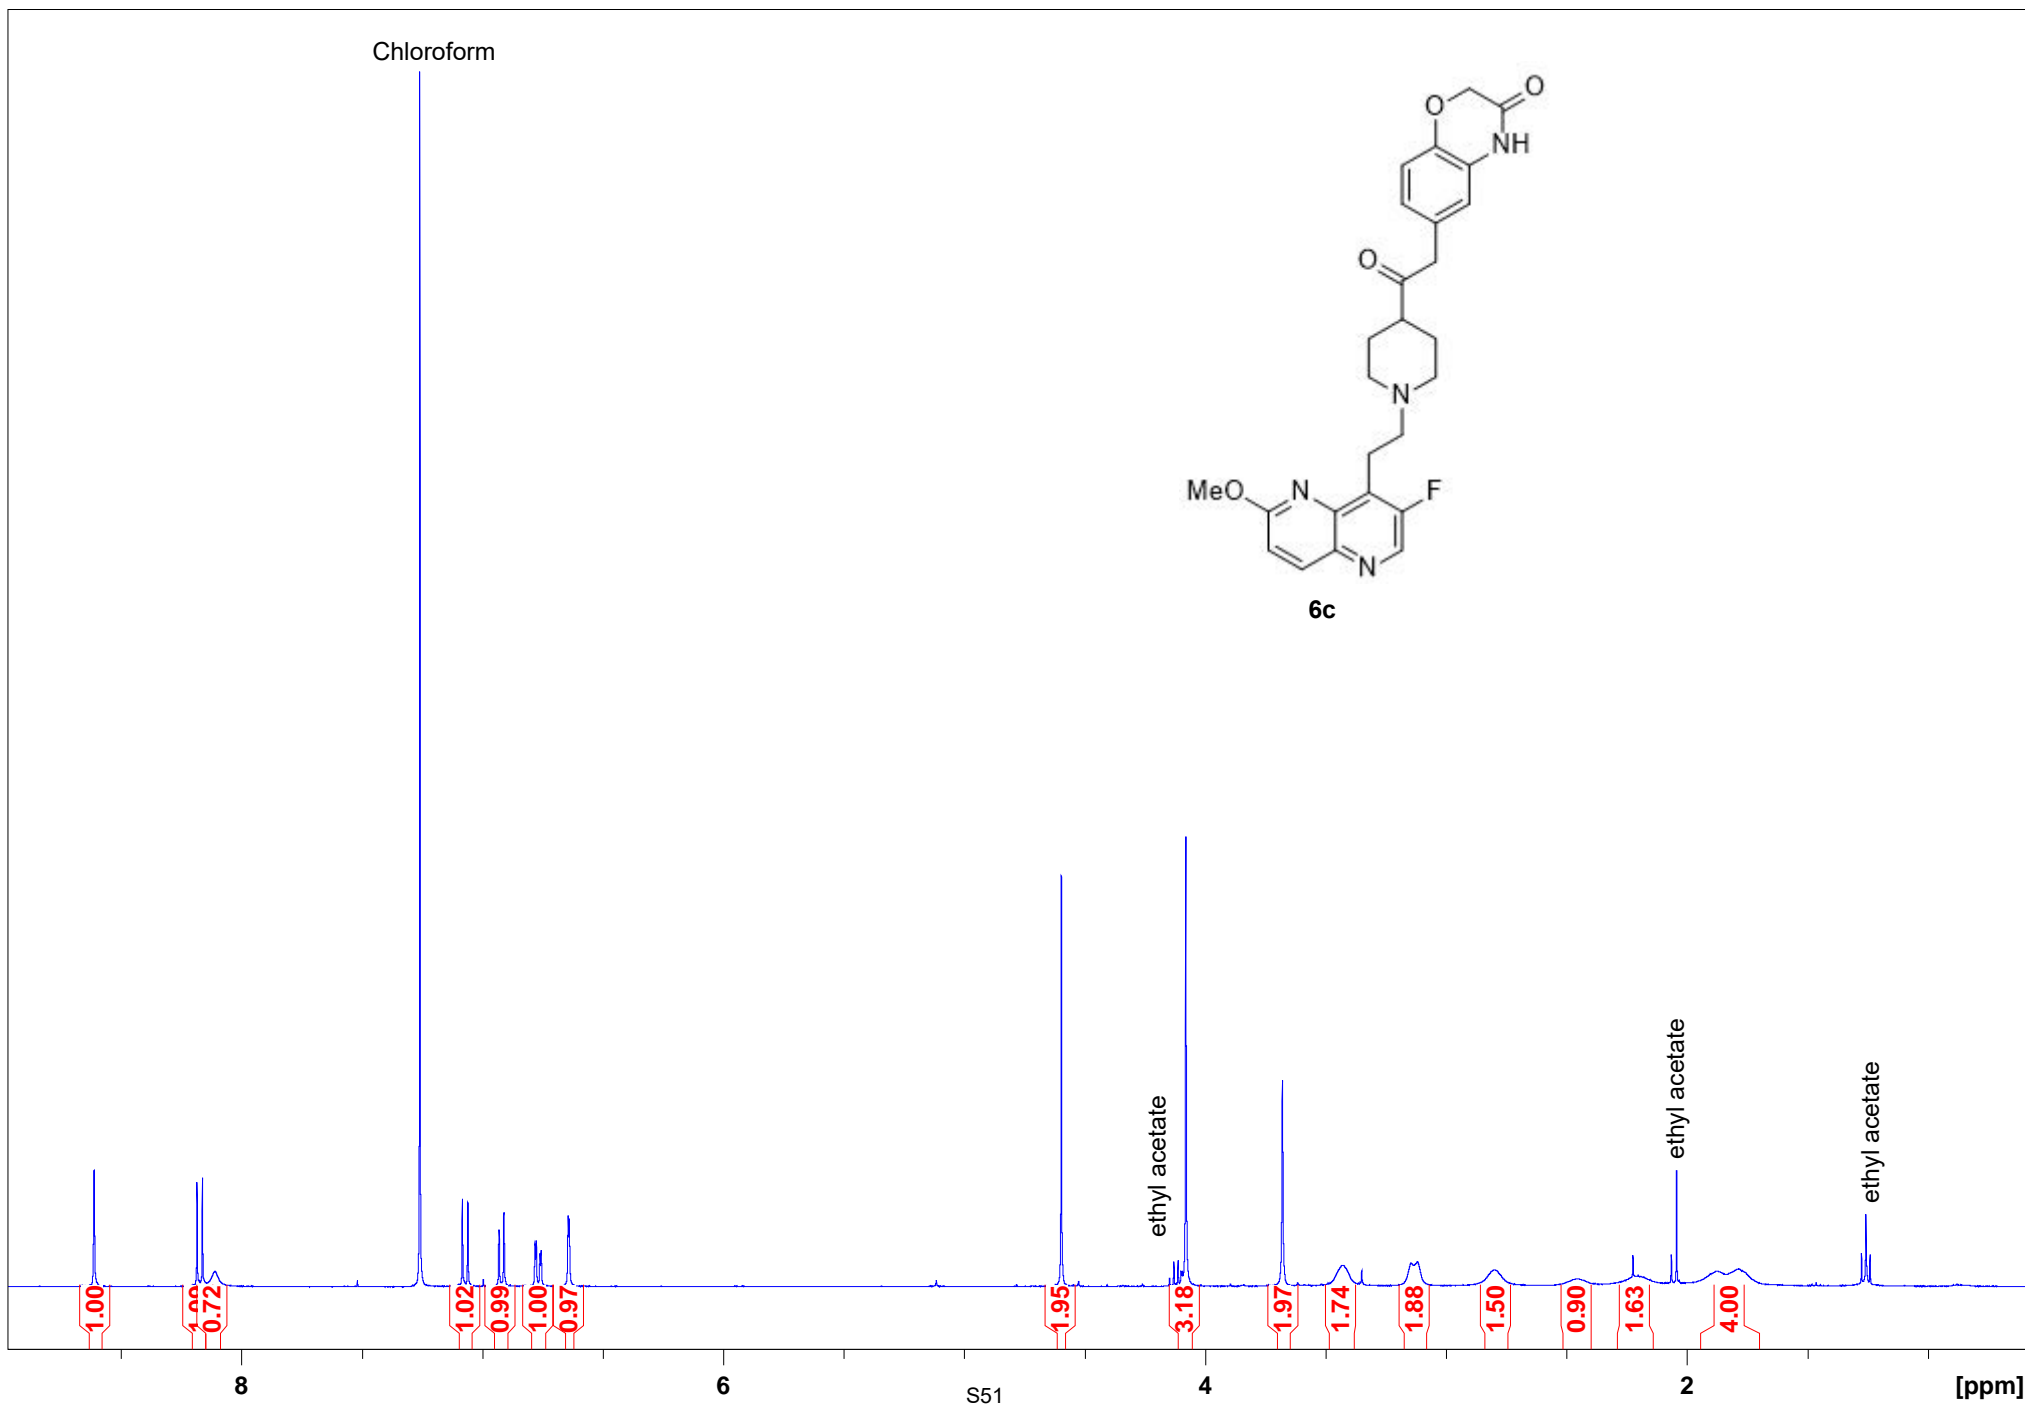

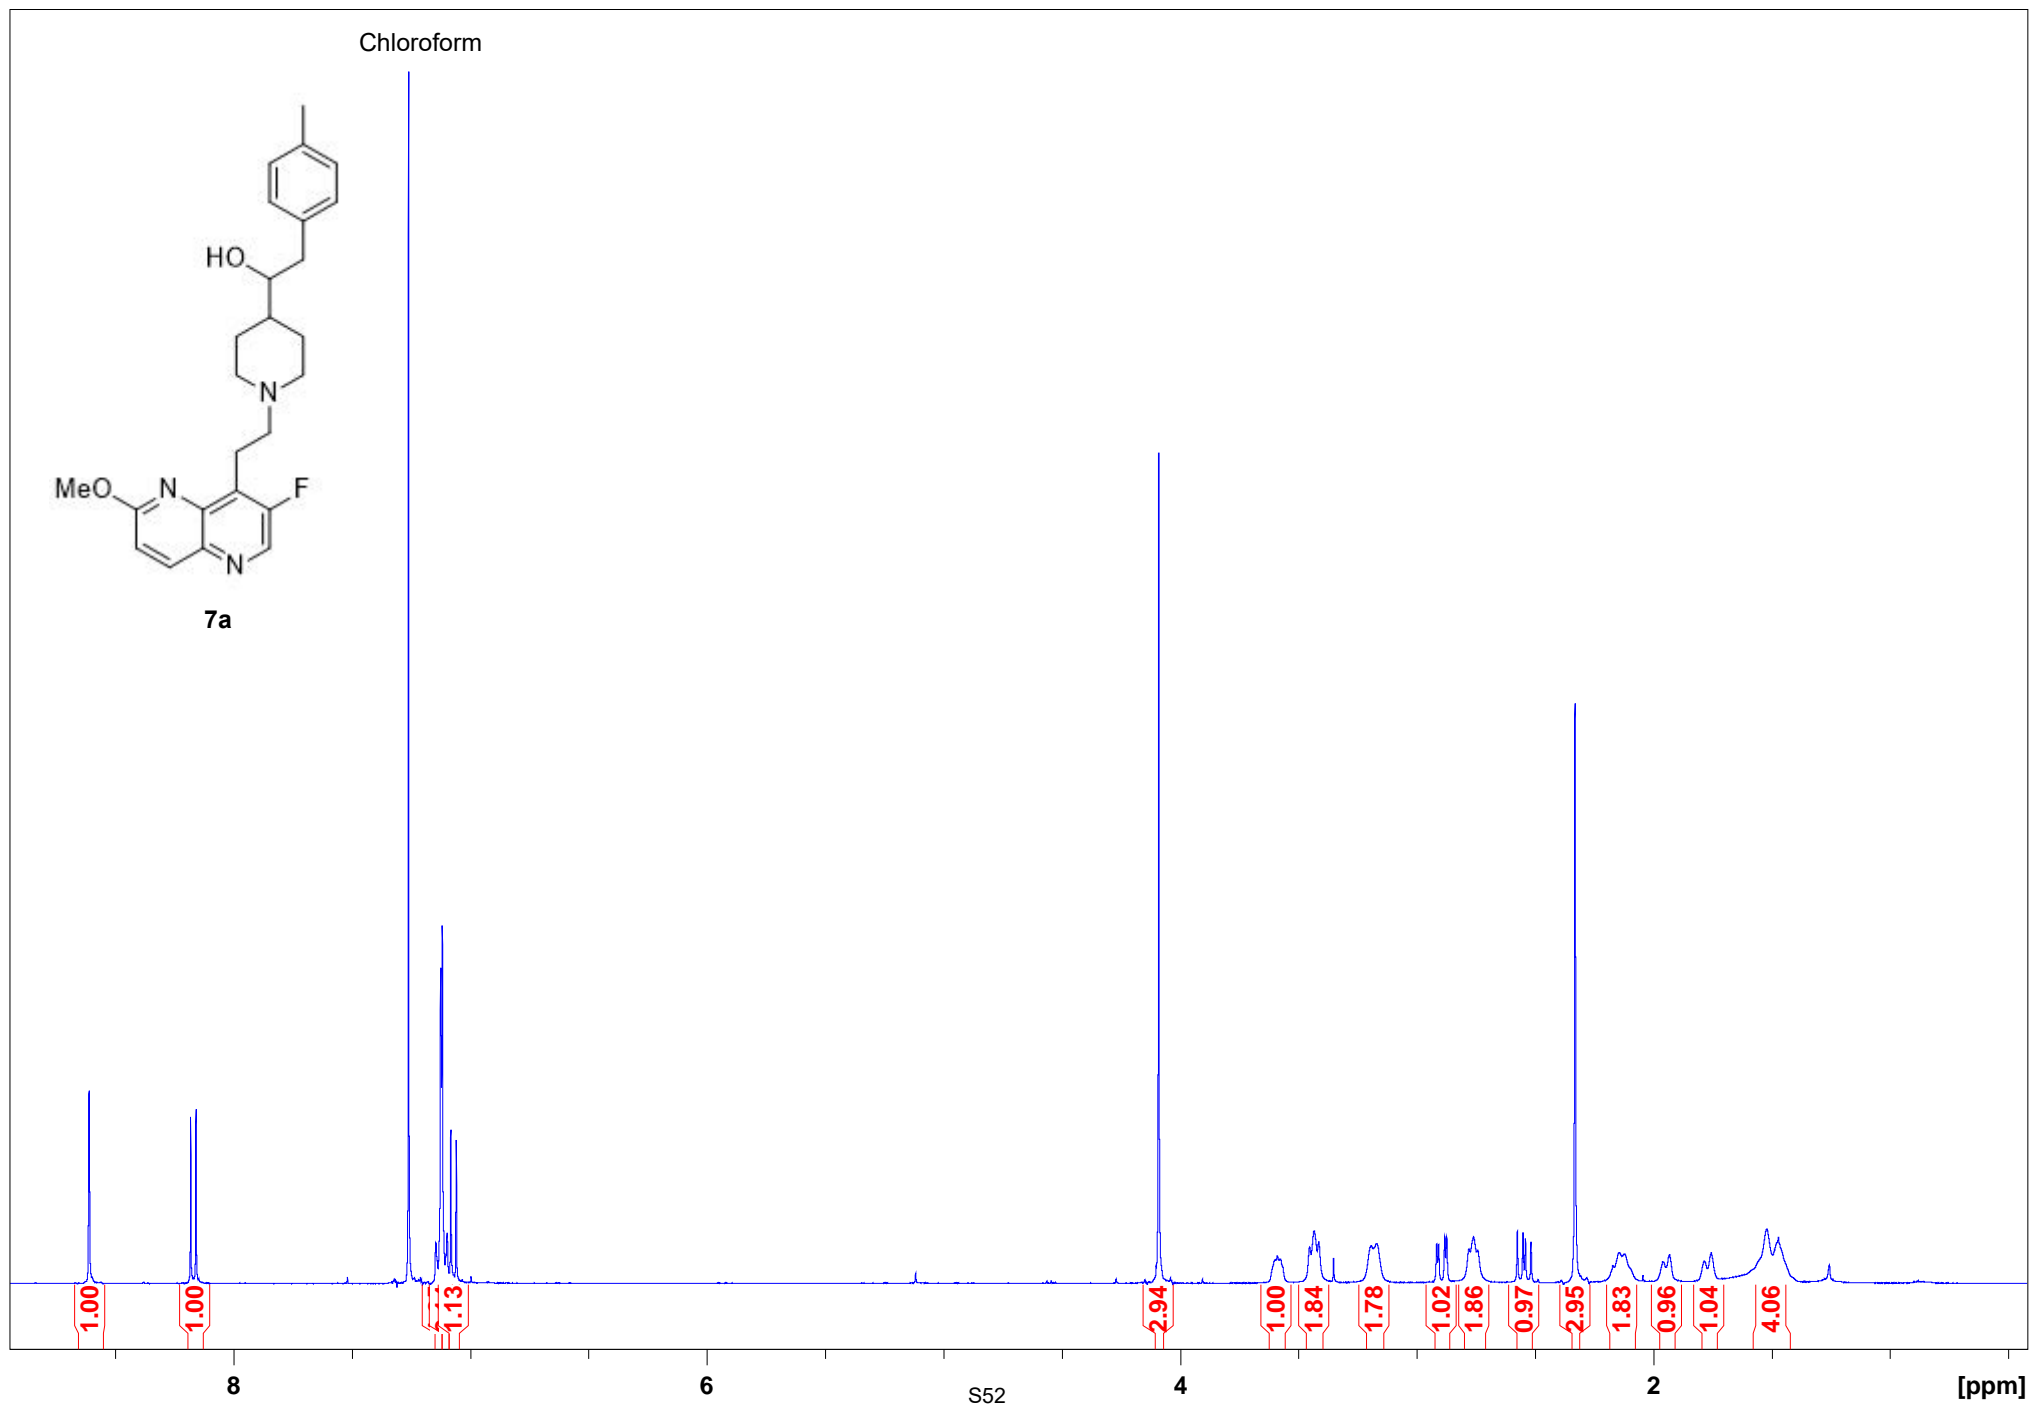

Chloroform

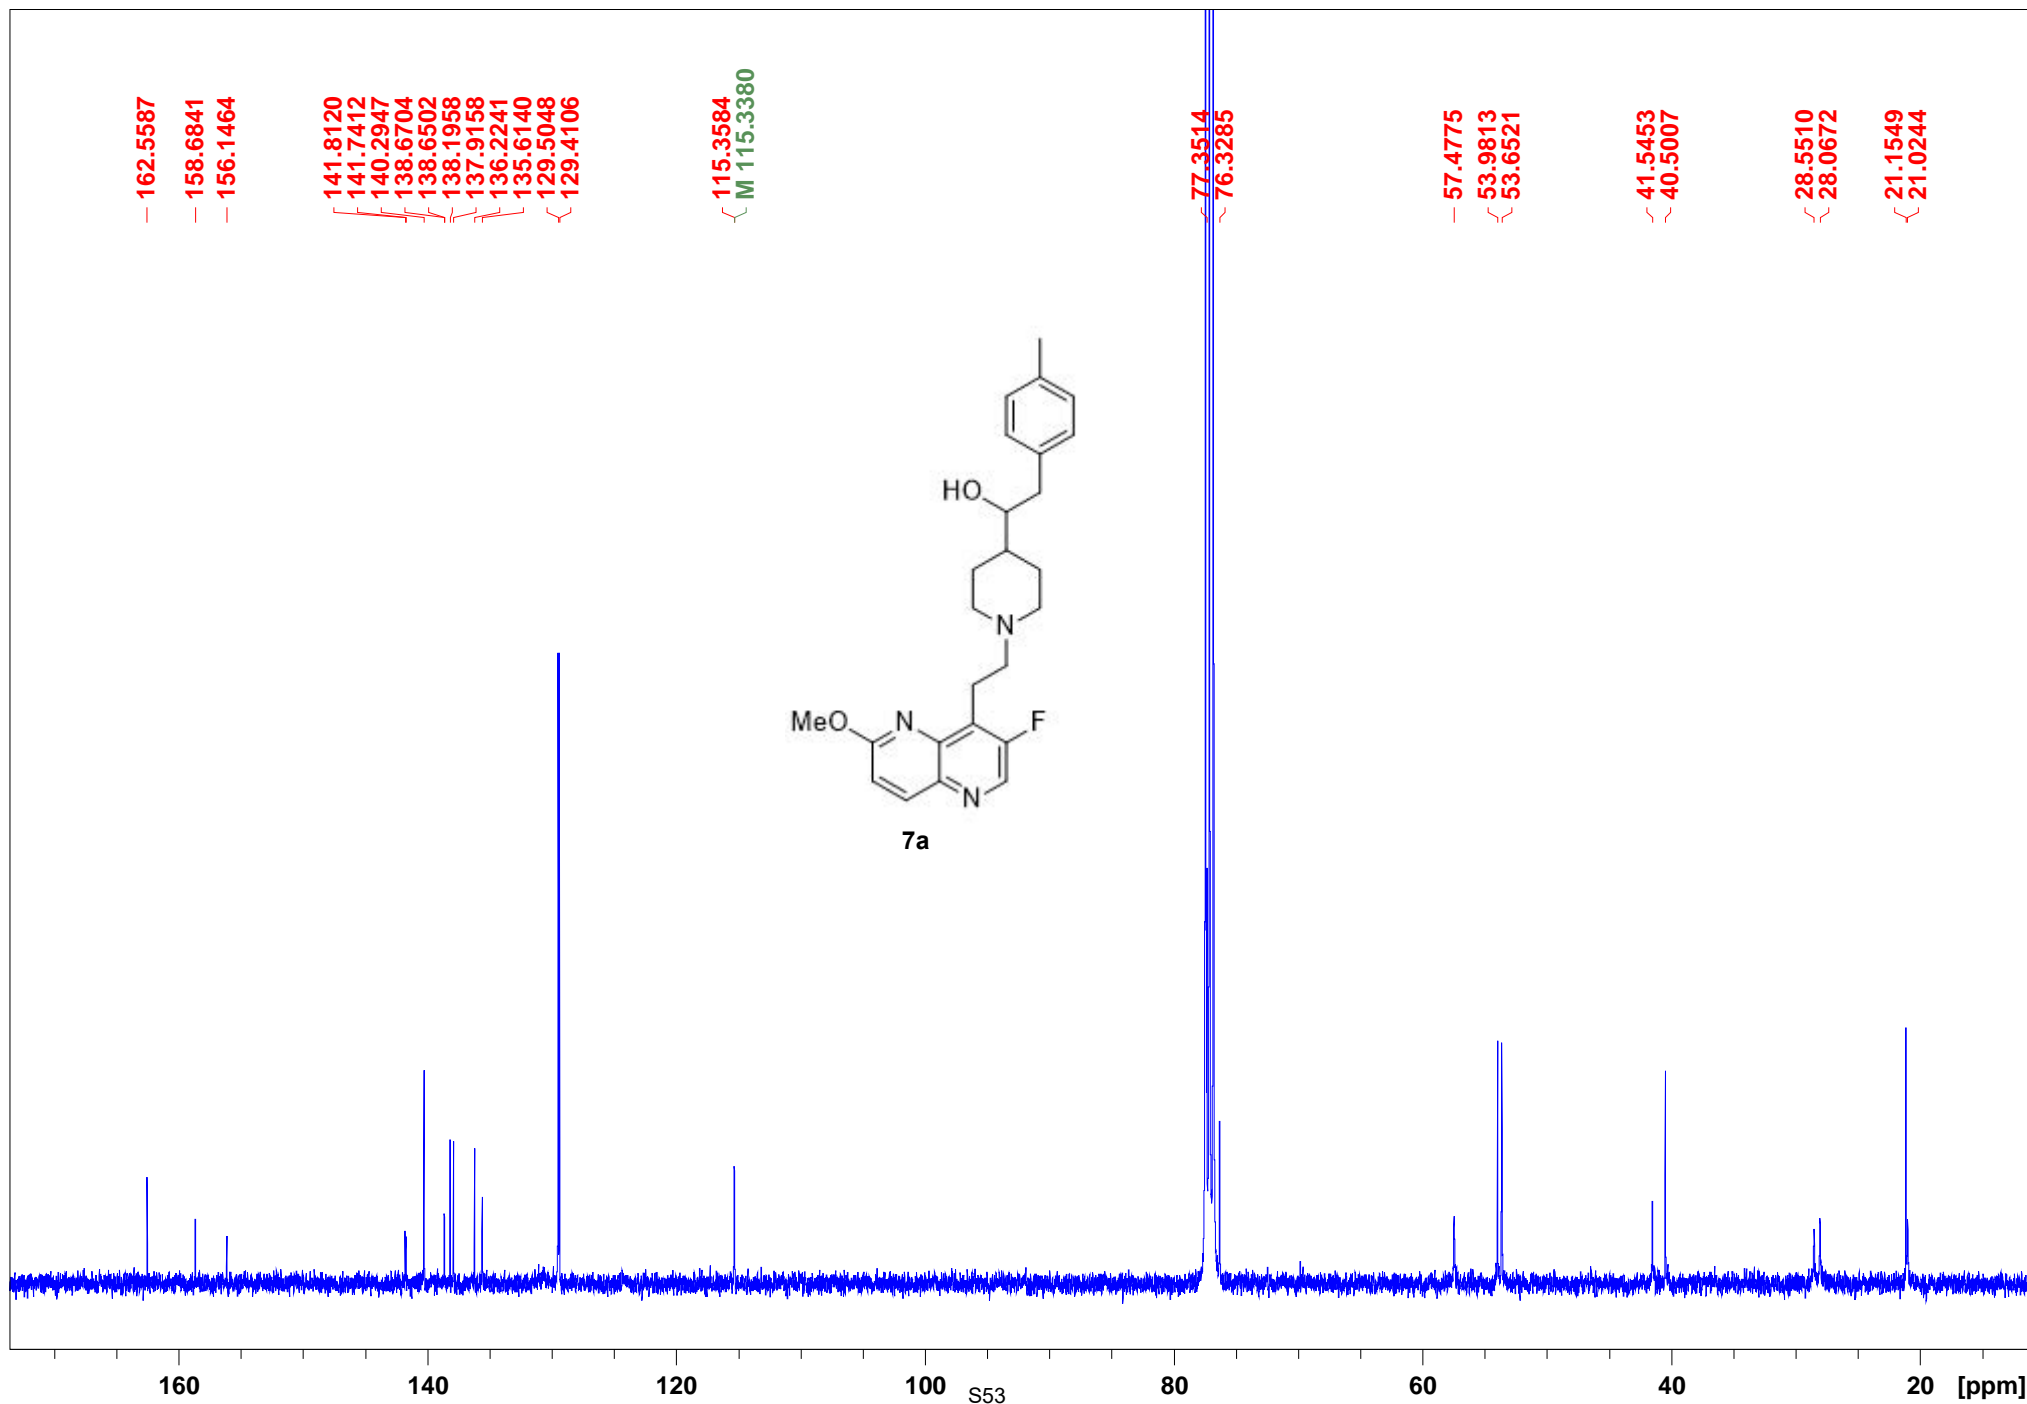

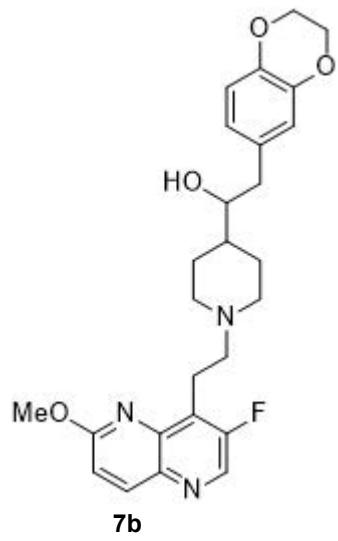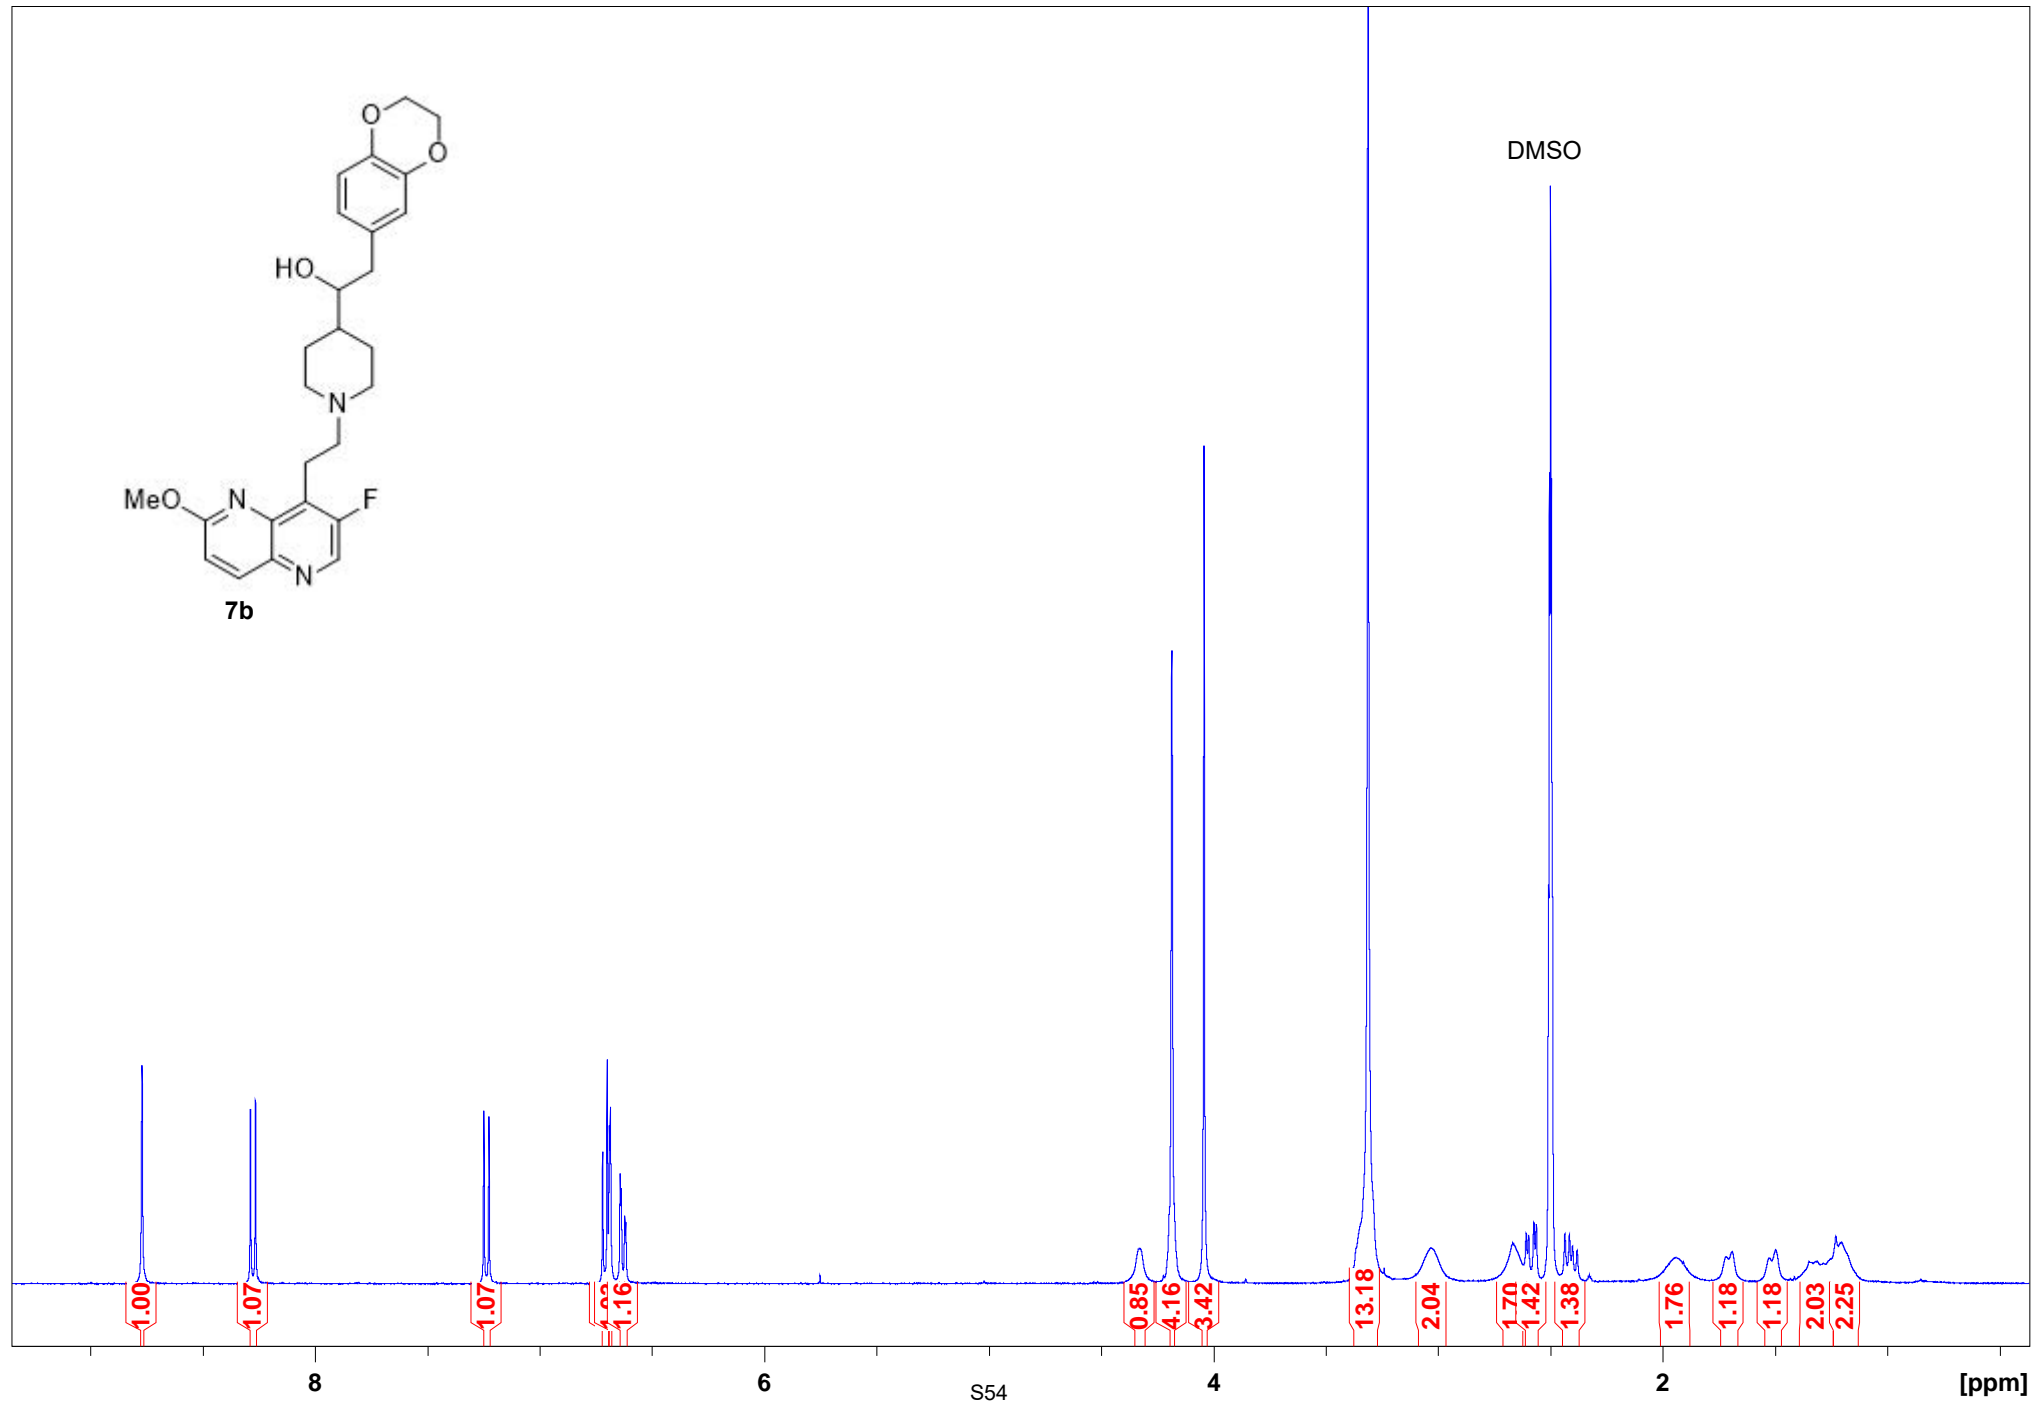

Chloroform

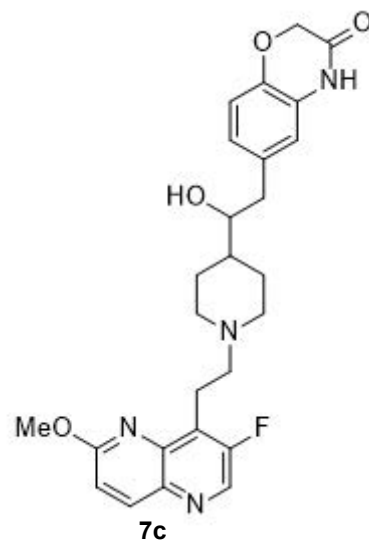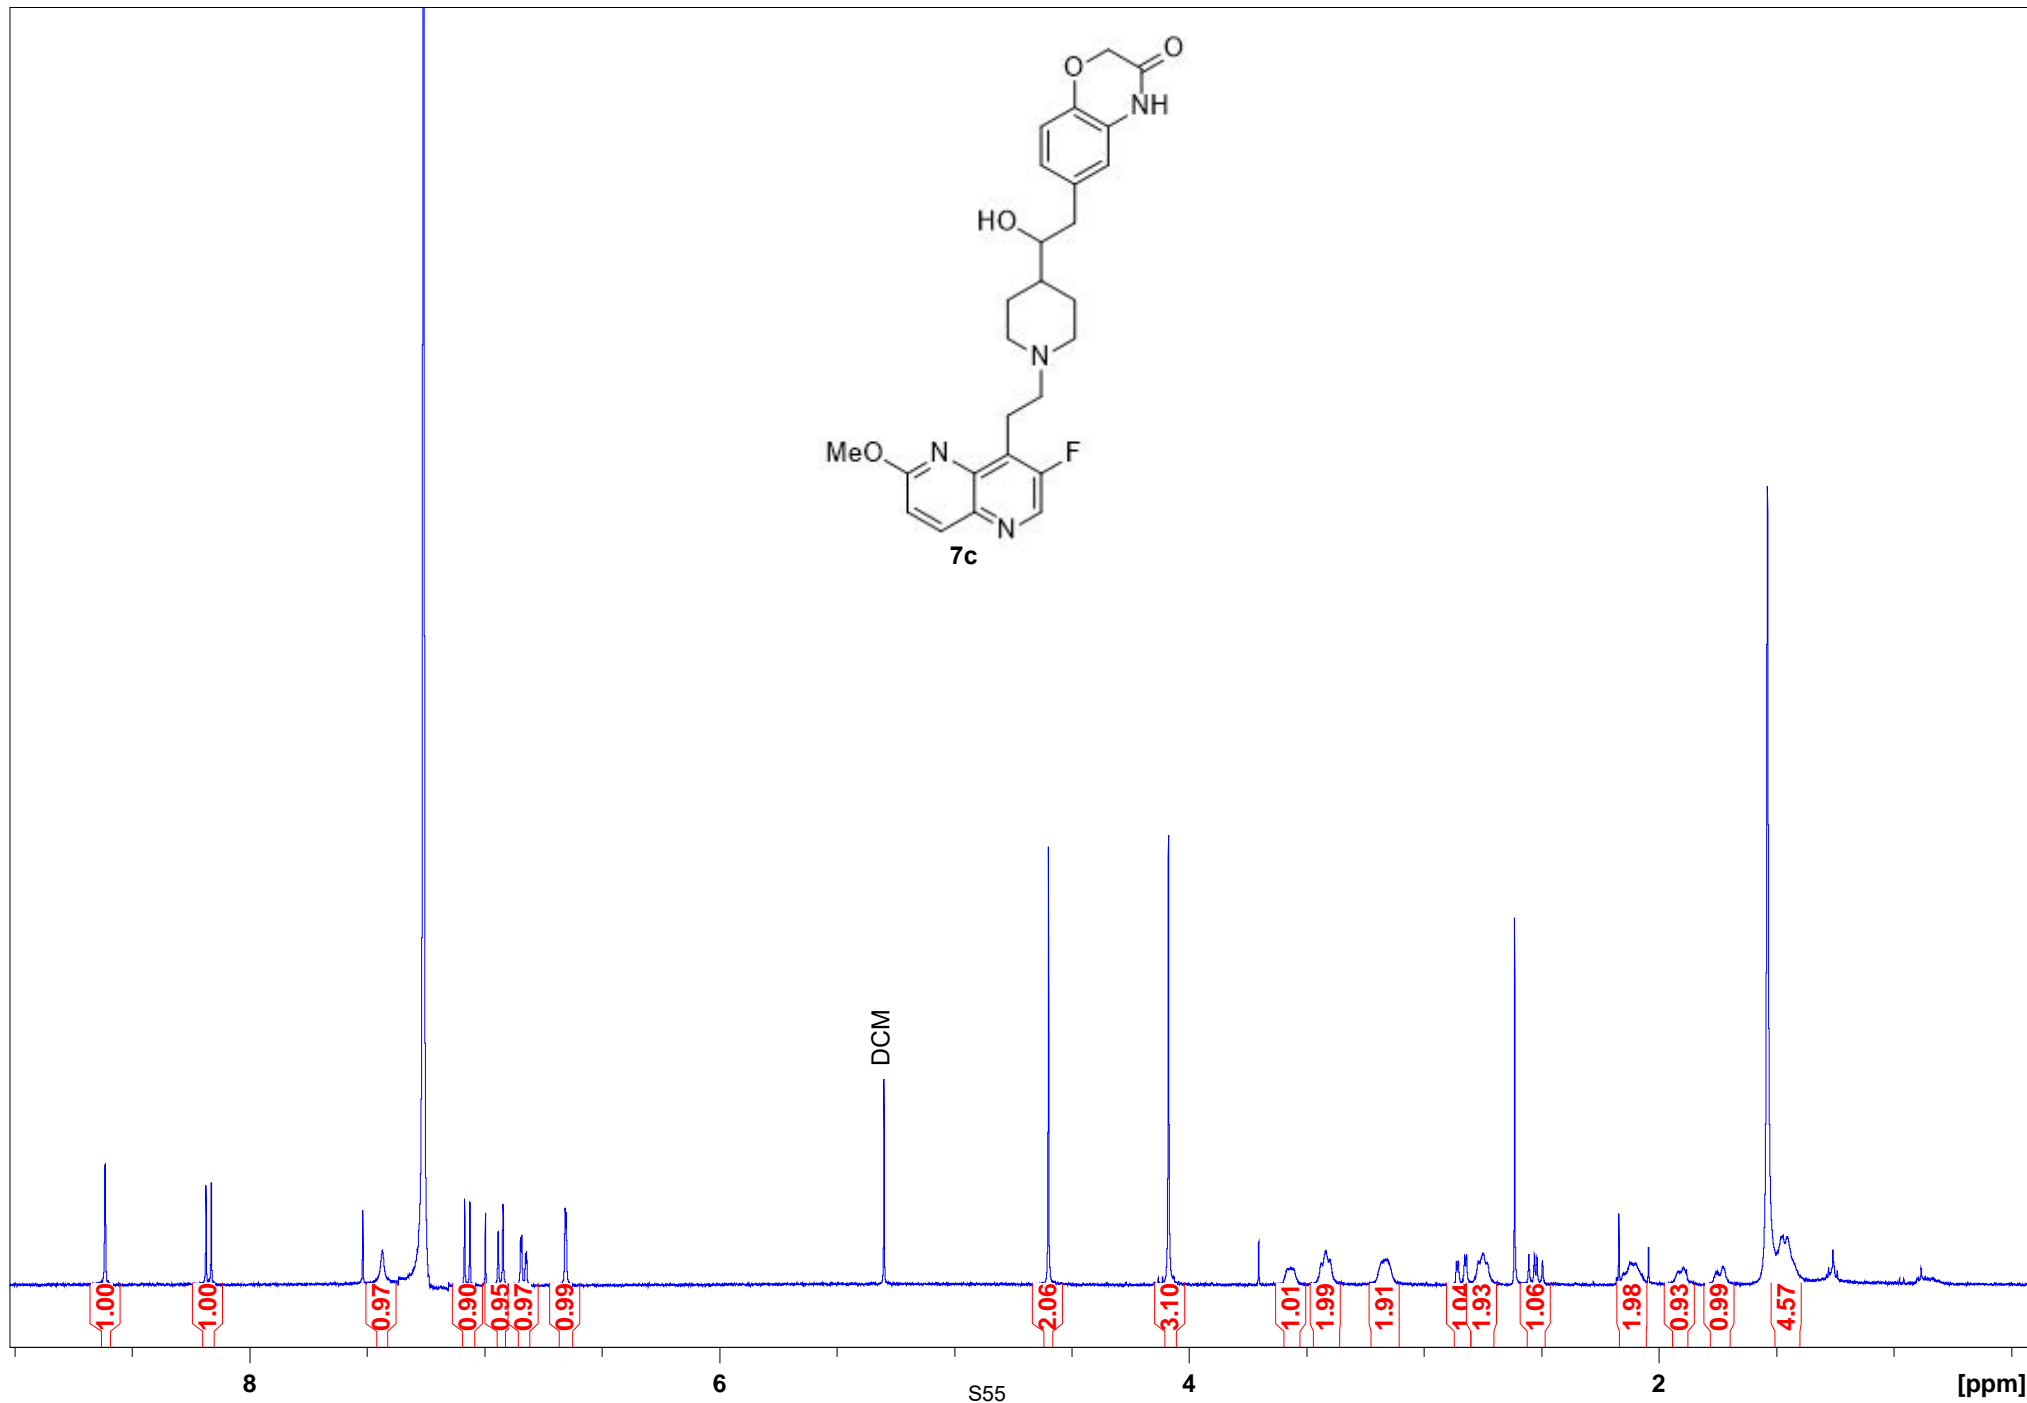

DMSO

- 165.0061
- 161.9742
- 158.0873
- 155.5645

- 141.3225
- 140.9527
- 140.8826
- 140.4138
- M 138.0932
- 138.0749
- 138.0050
- 137.7295
- 134.3049

- 126.7048
- 123.7595

- 116.6576
- 115.5325
- 115.2910
- M 115.2743

- 78.8074
- 74.6549

- 66.7657

- 56.9200
- 56.8478
- 53.5502
- 53.1568

- 30.1702
- 28.5285
- 28.0112
- 26.6646

- 20.6715

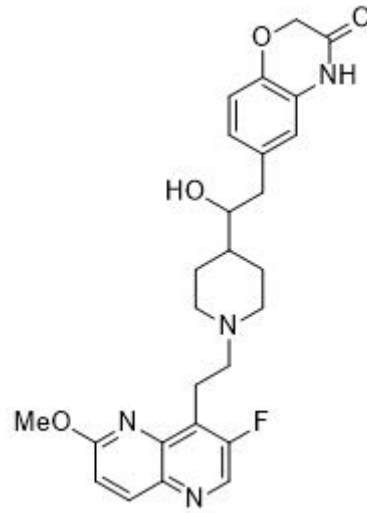

7c

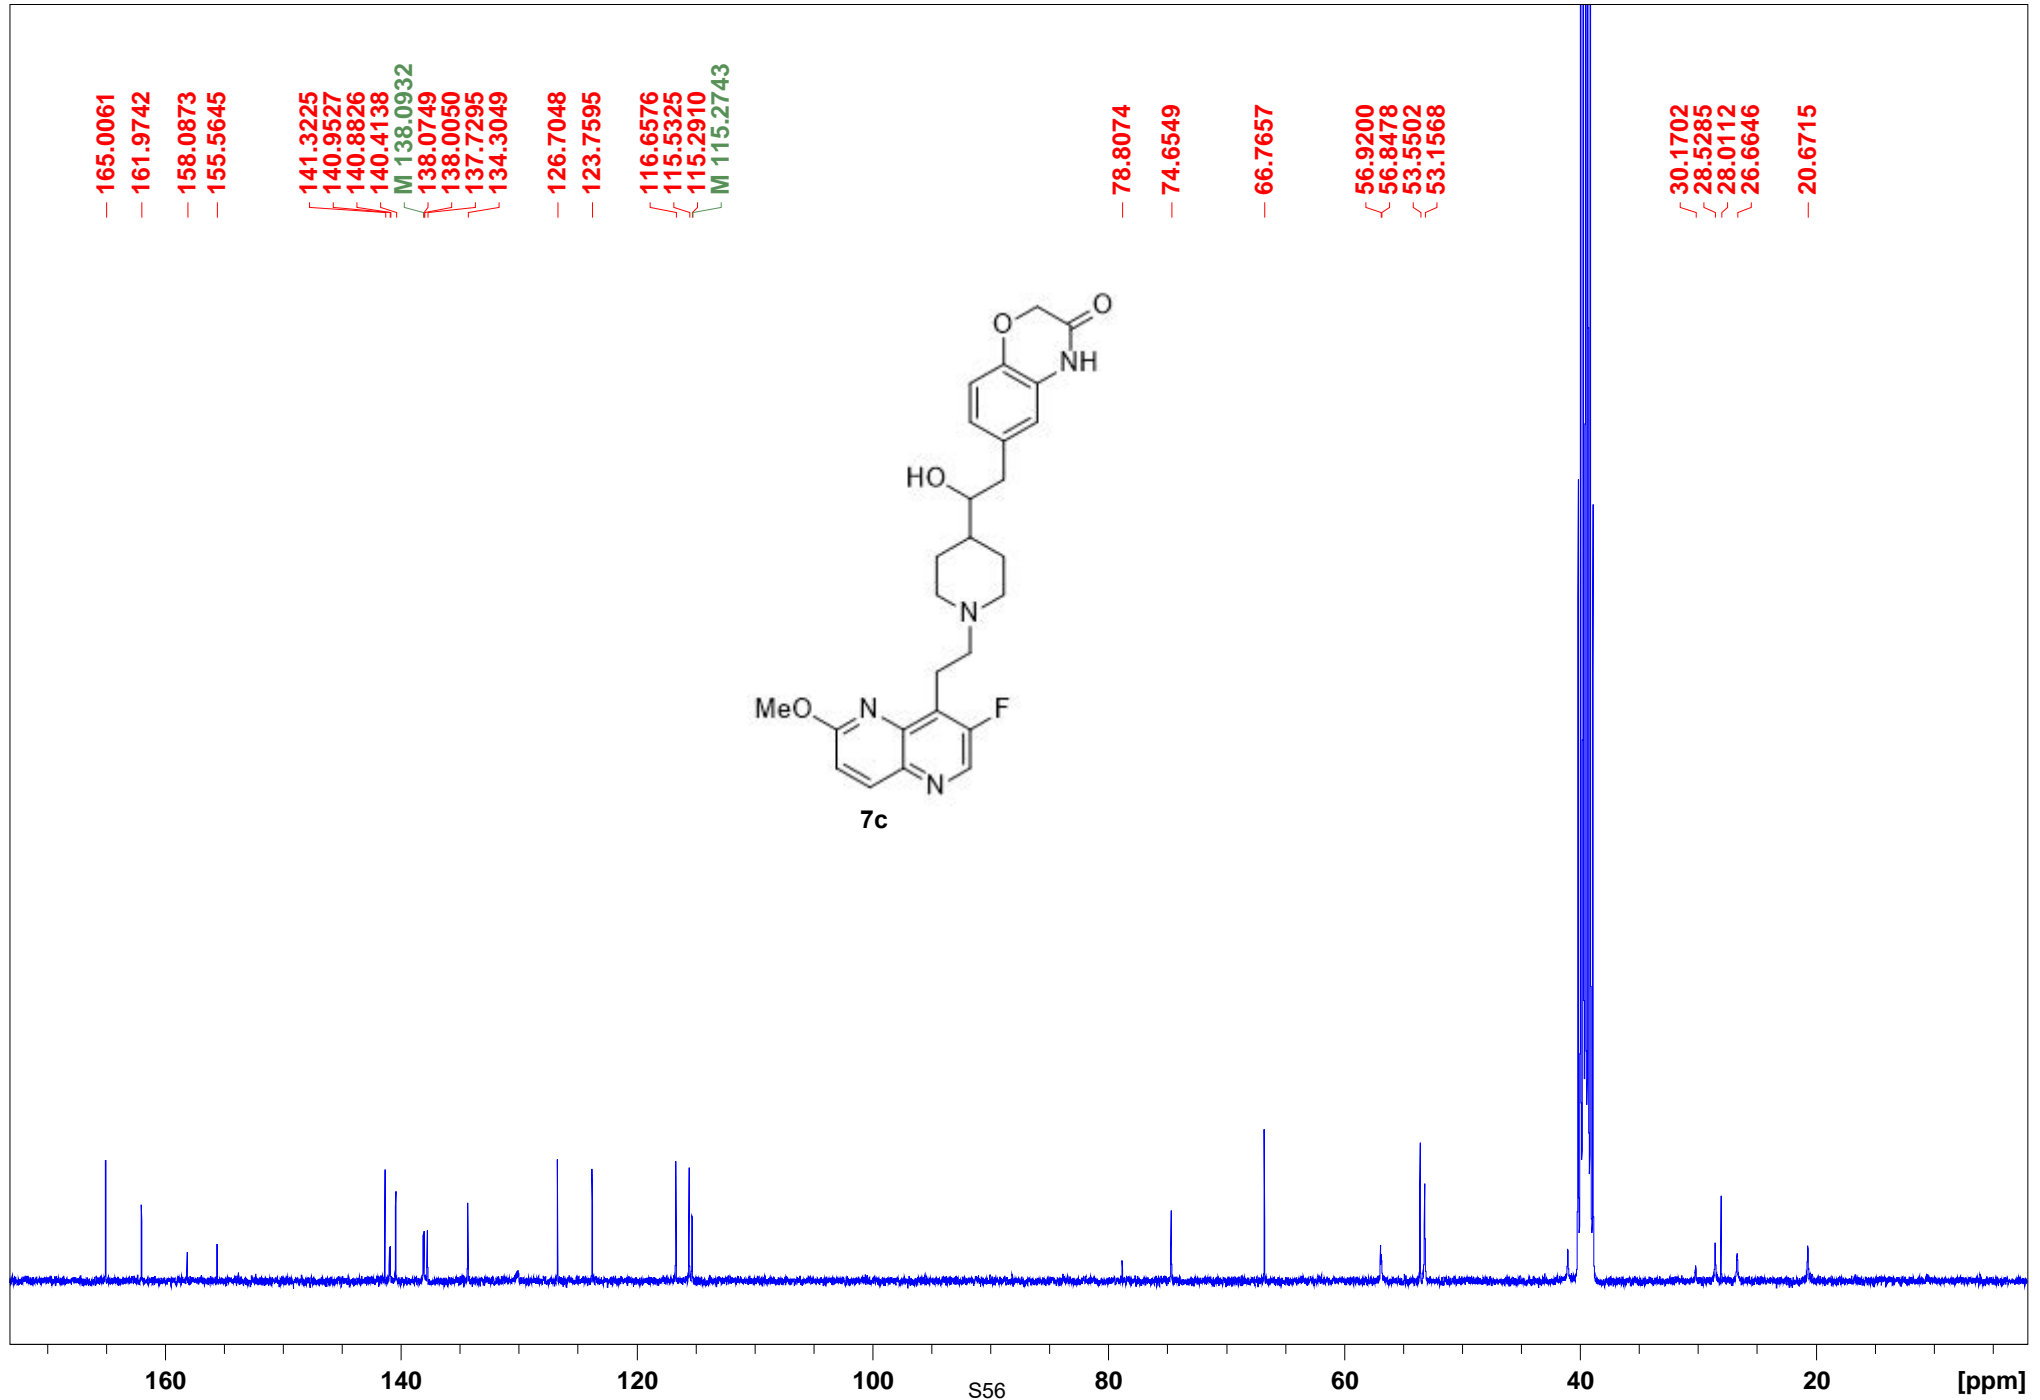



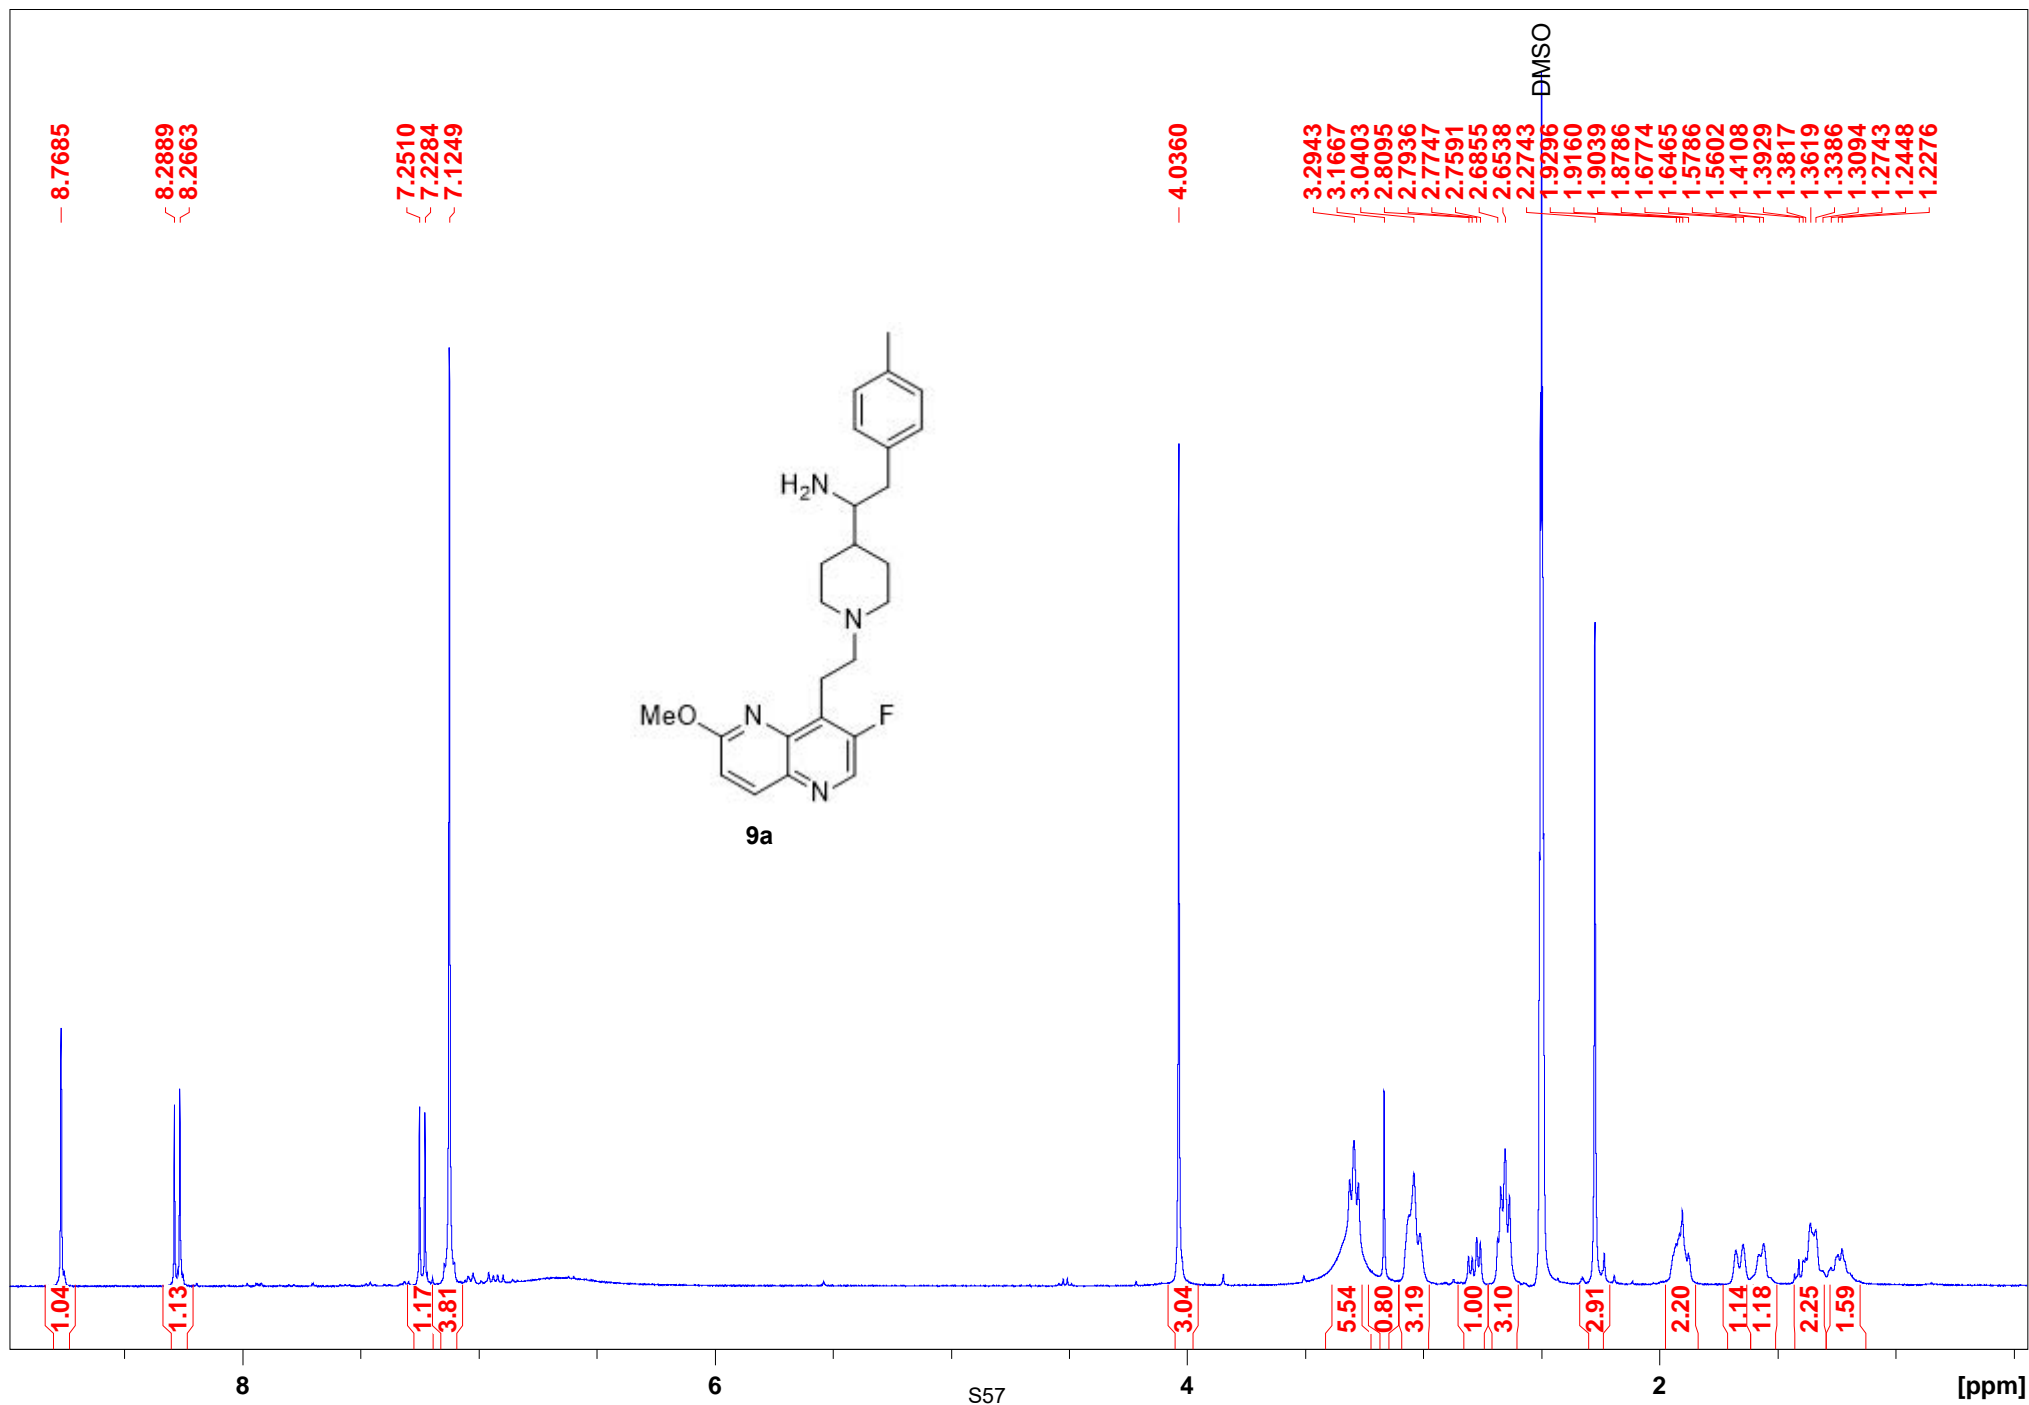

DMSO

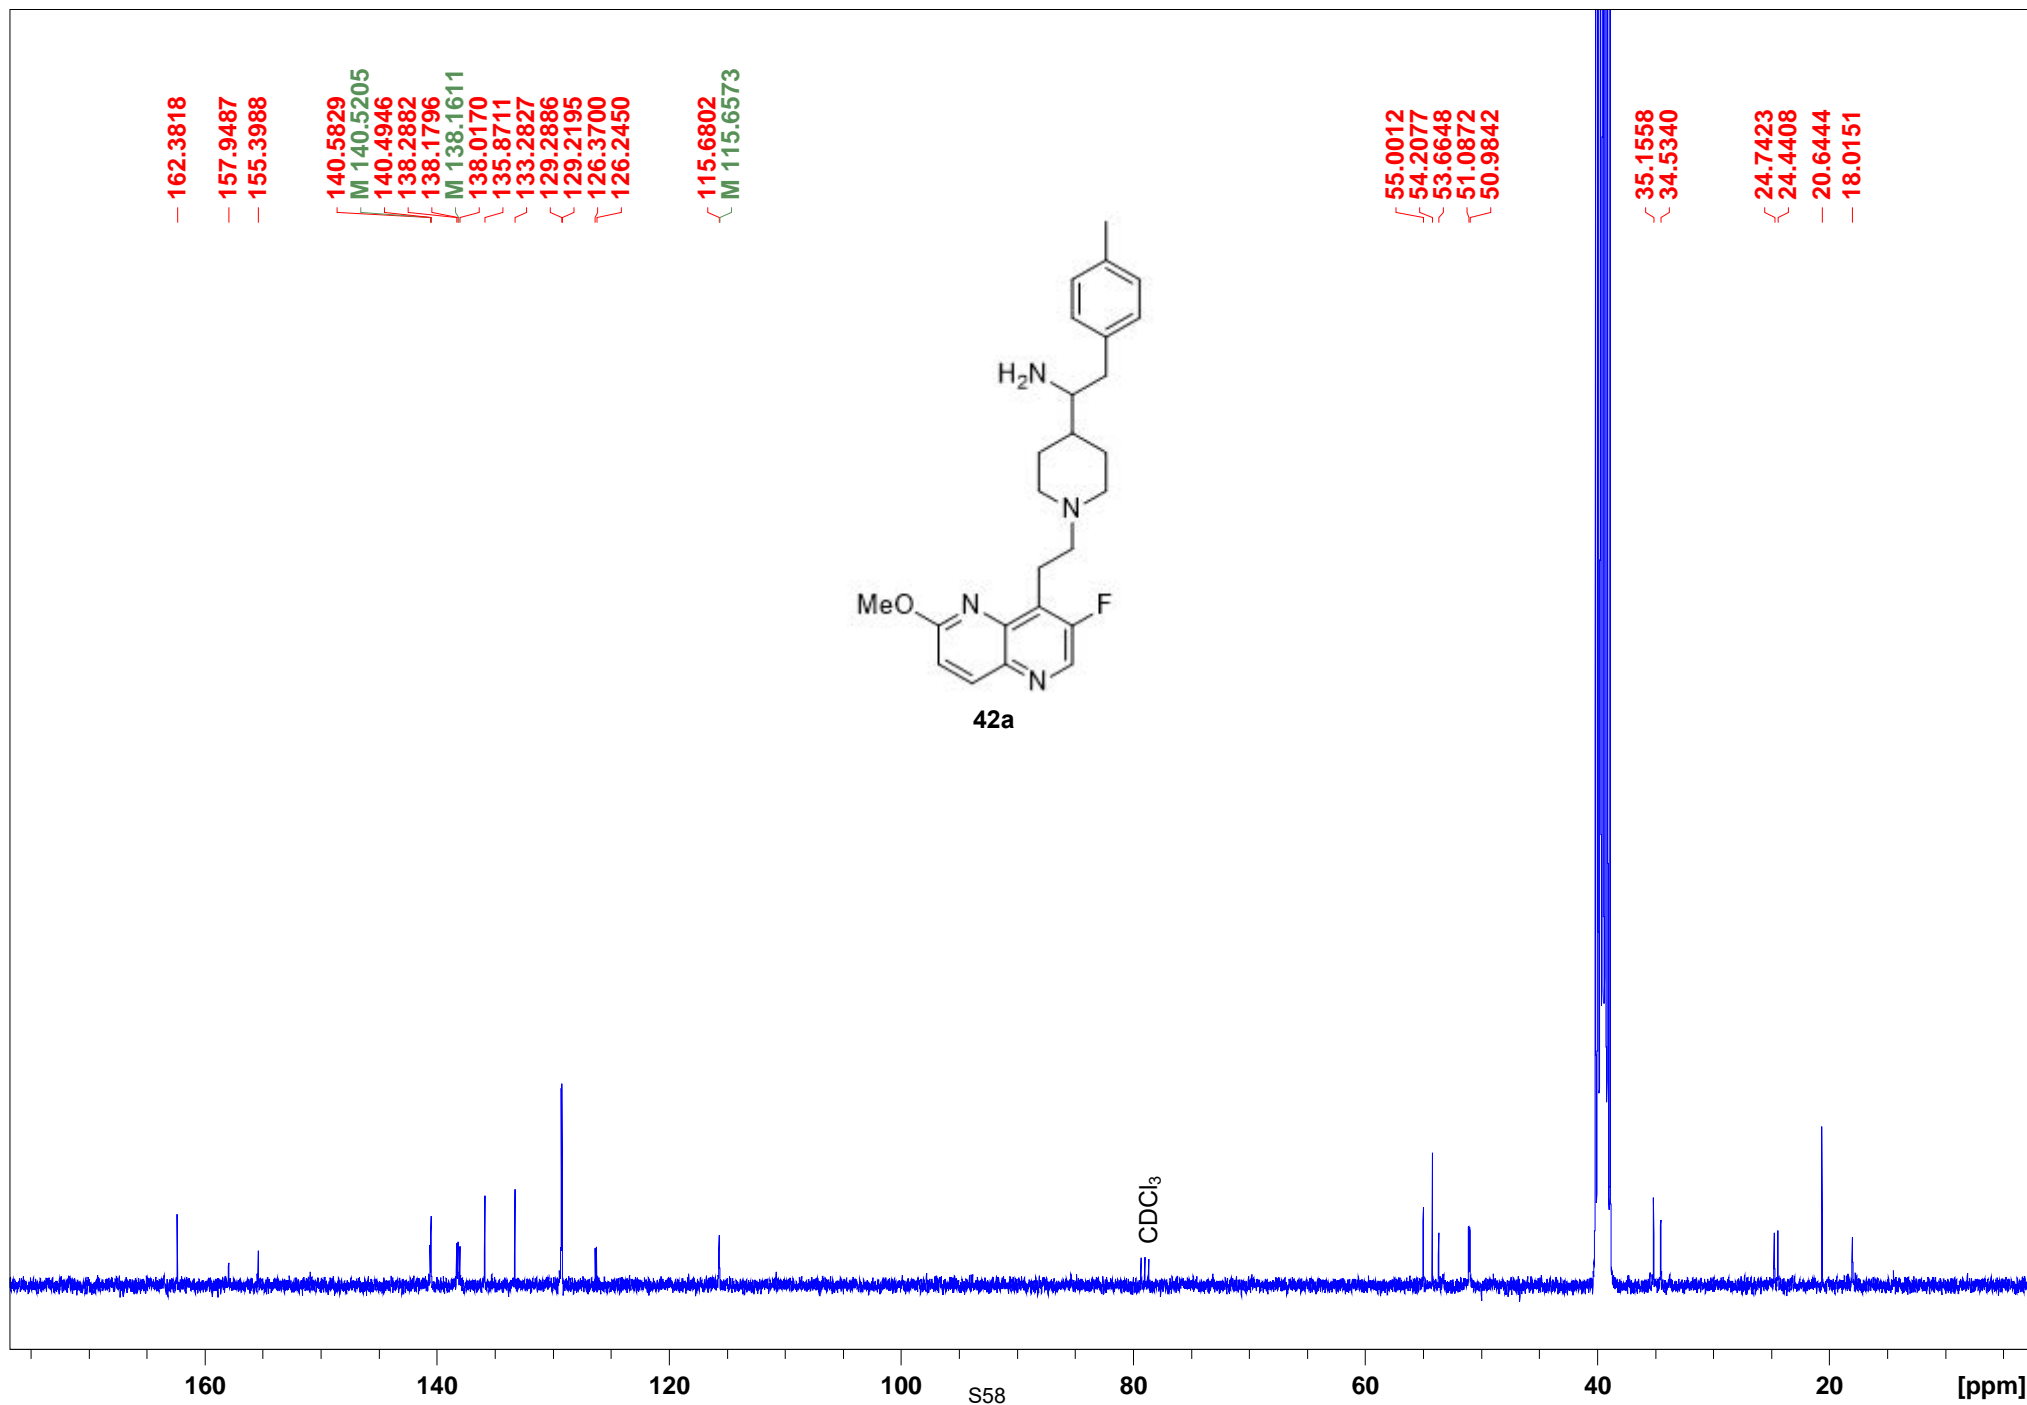

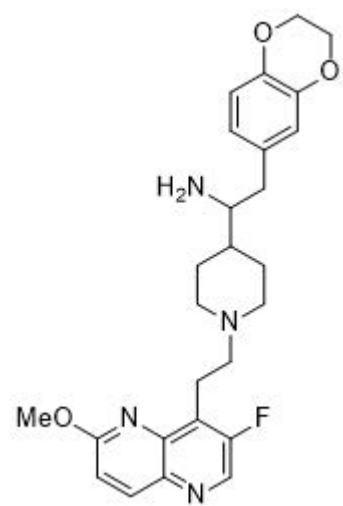

9b

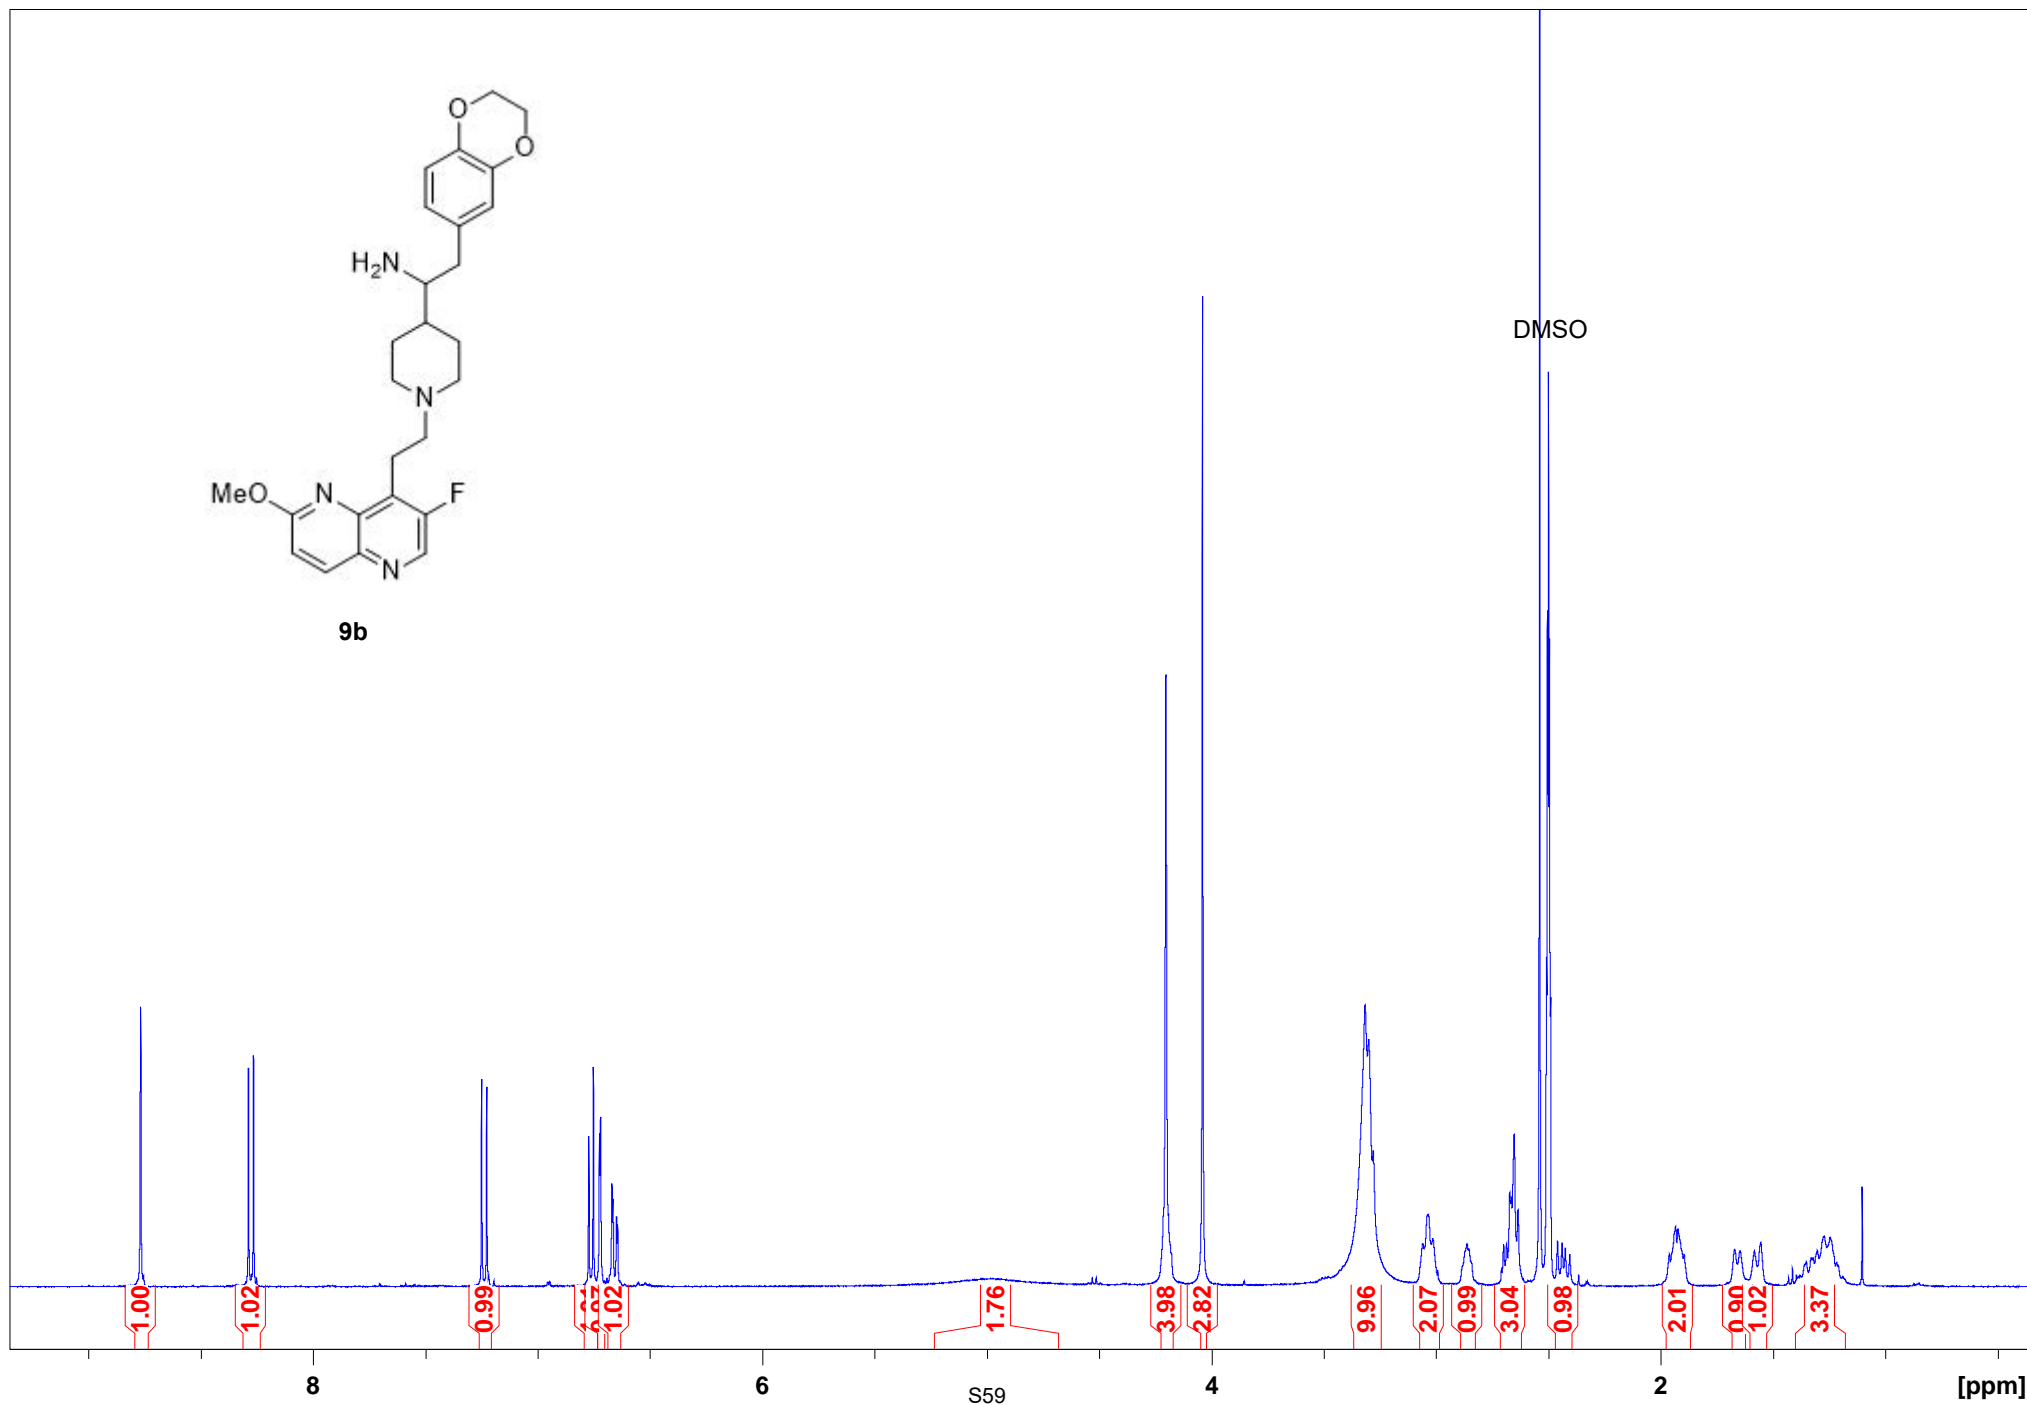

DMSO

161.9814  
158.0992  
155.5748

143.0927  
141.8133  
140.9595  
140.8885  
140.4267  
138.1021  
M 138.0842  
138.0085  
137.7335  
131.5537  
130.1498  
130.0206

121.8902  
117.6326  
116.8102  
115.3110  
M 115.2870

64.0157  
63.9335  
56.7438  
56.2172  
53.5528  
53.1107  
53.0760

37.6306

28.2104  
26.7032  
25.8027  
20.6944

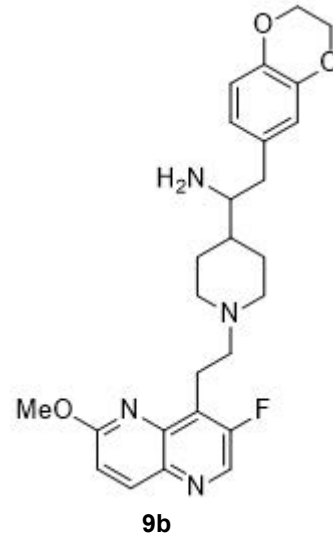

CDCl<sub>3</sub>

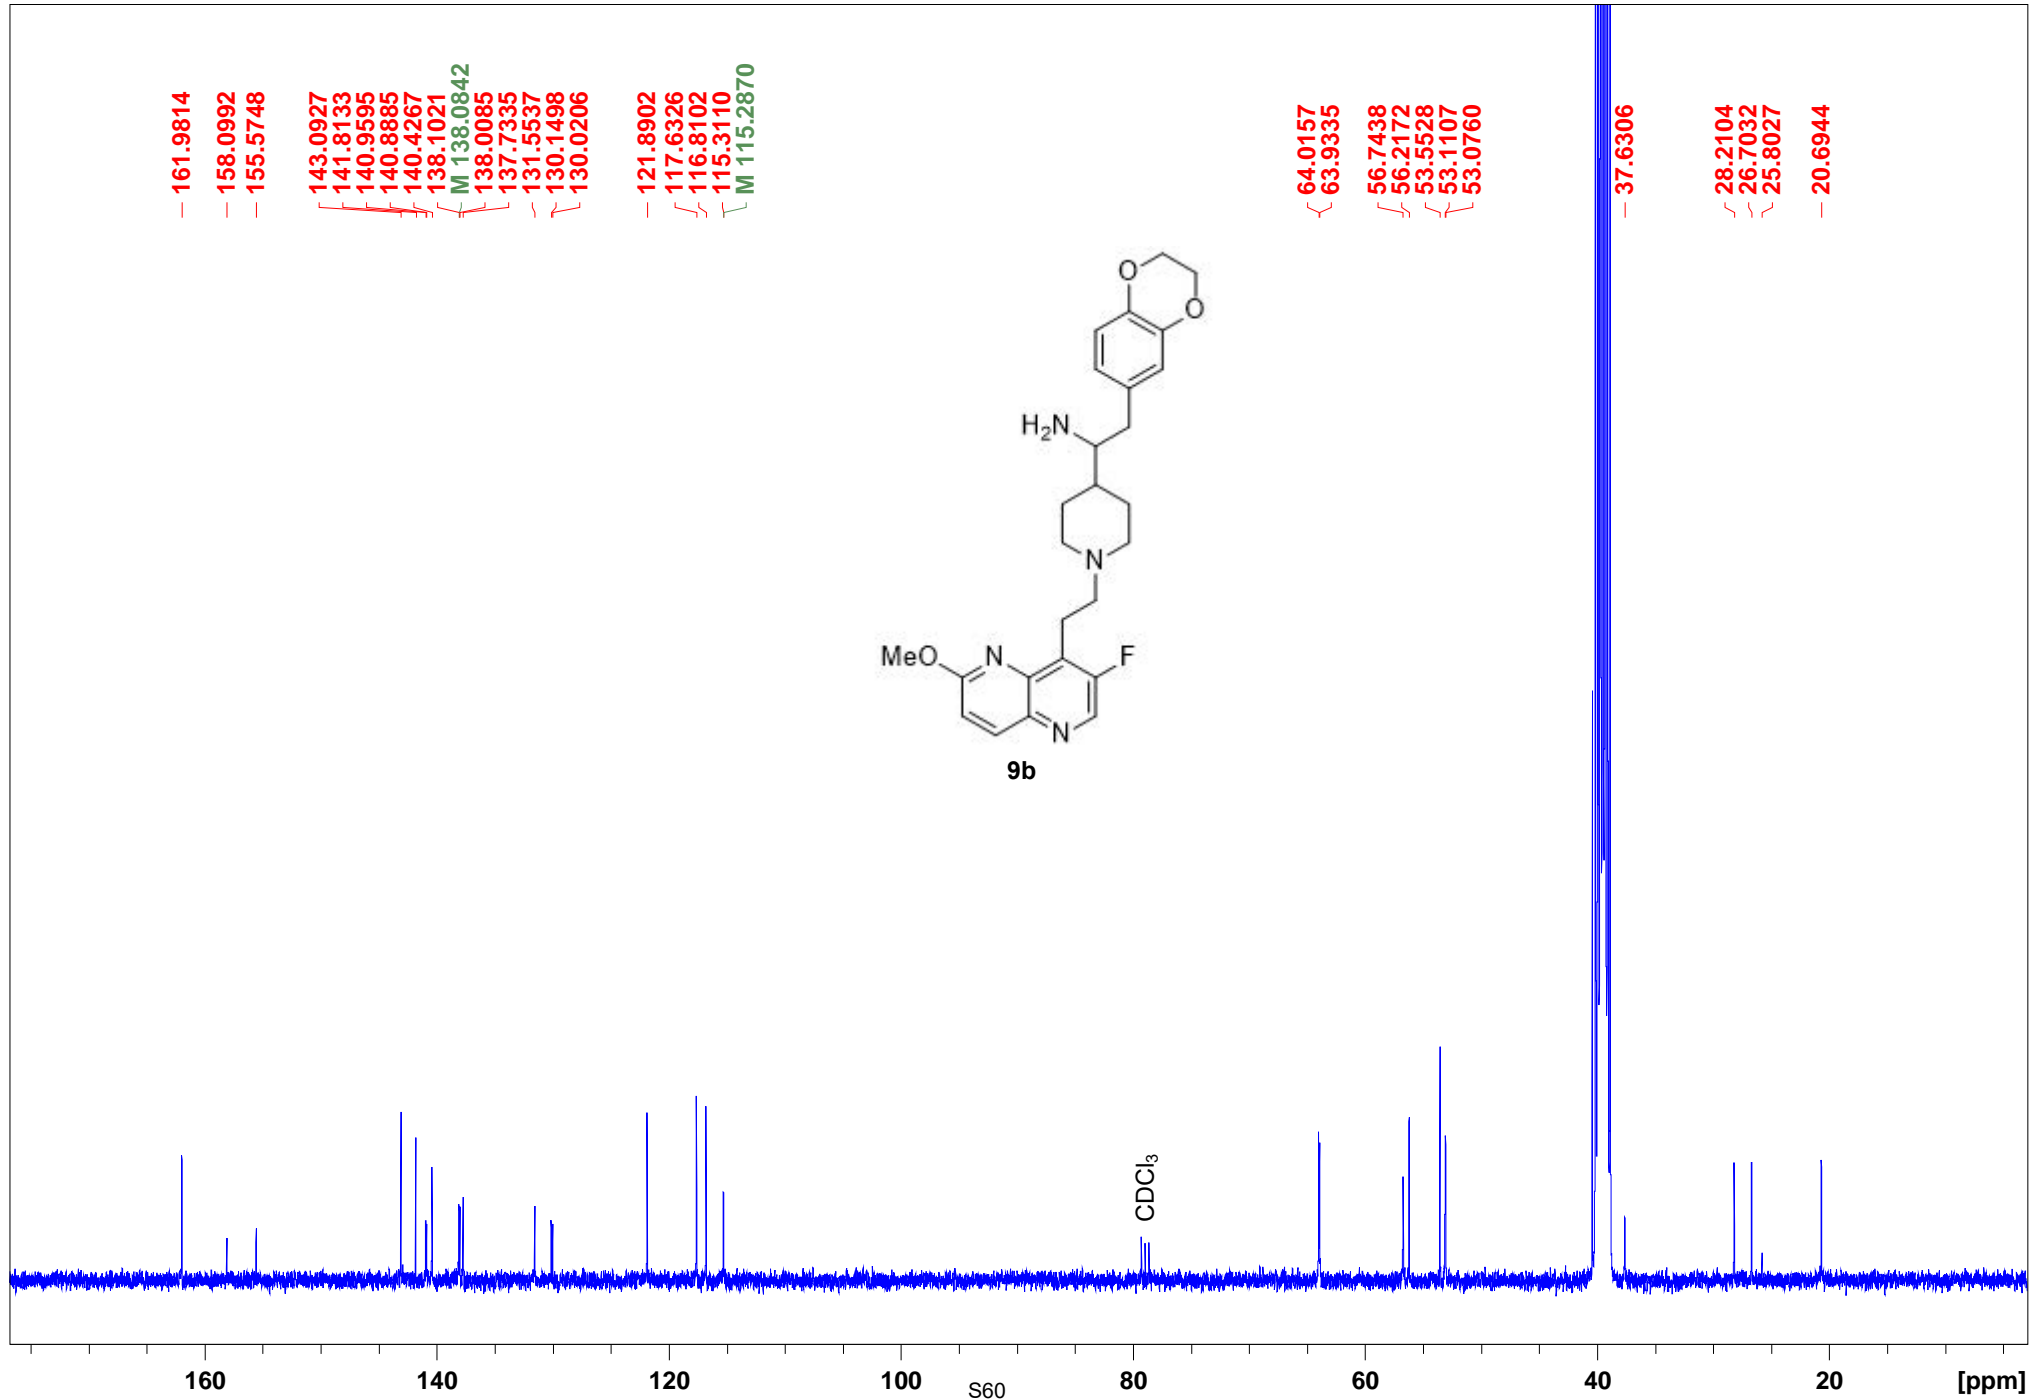

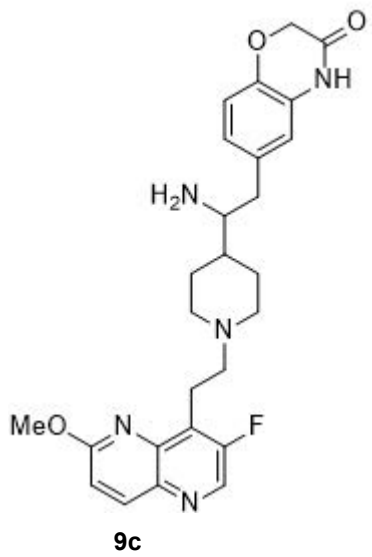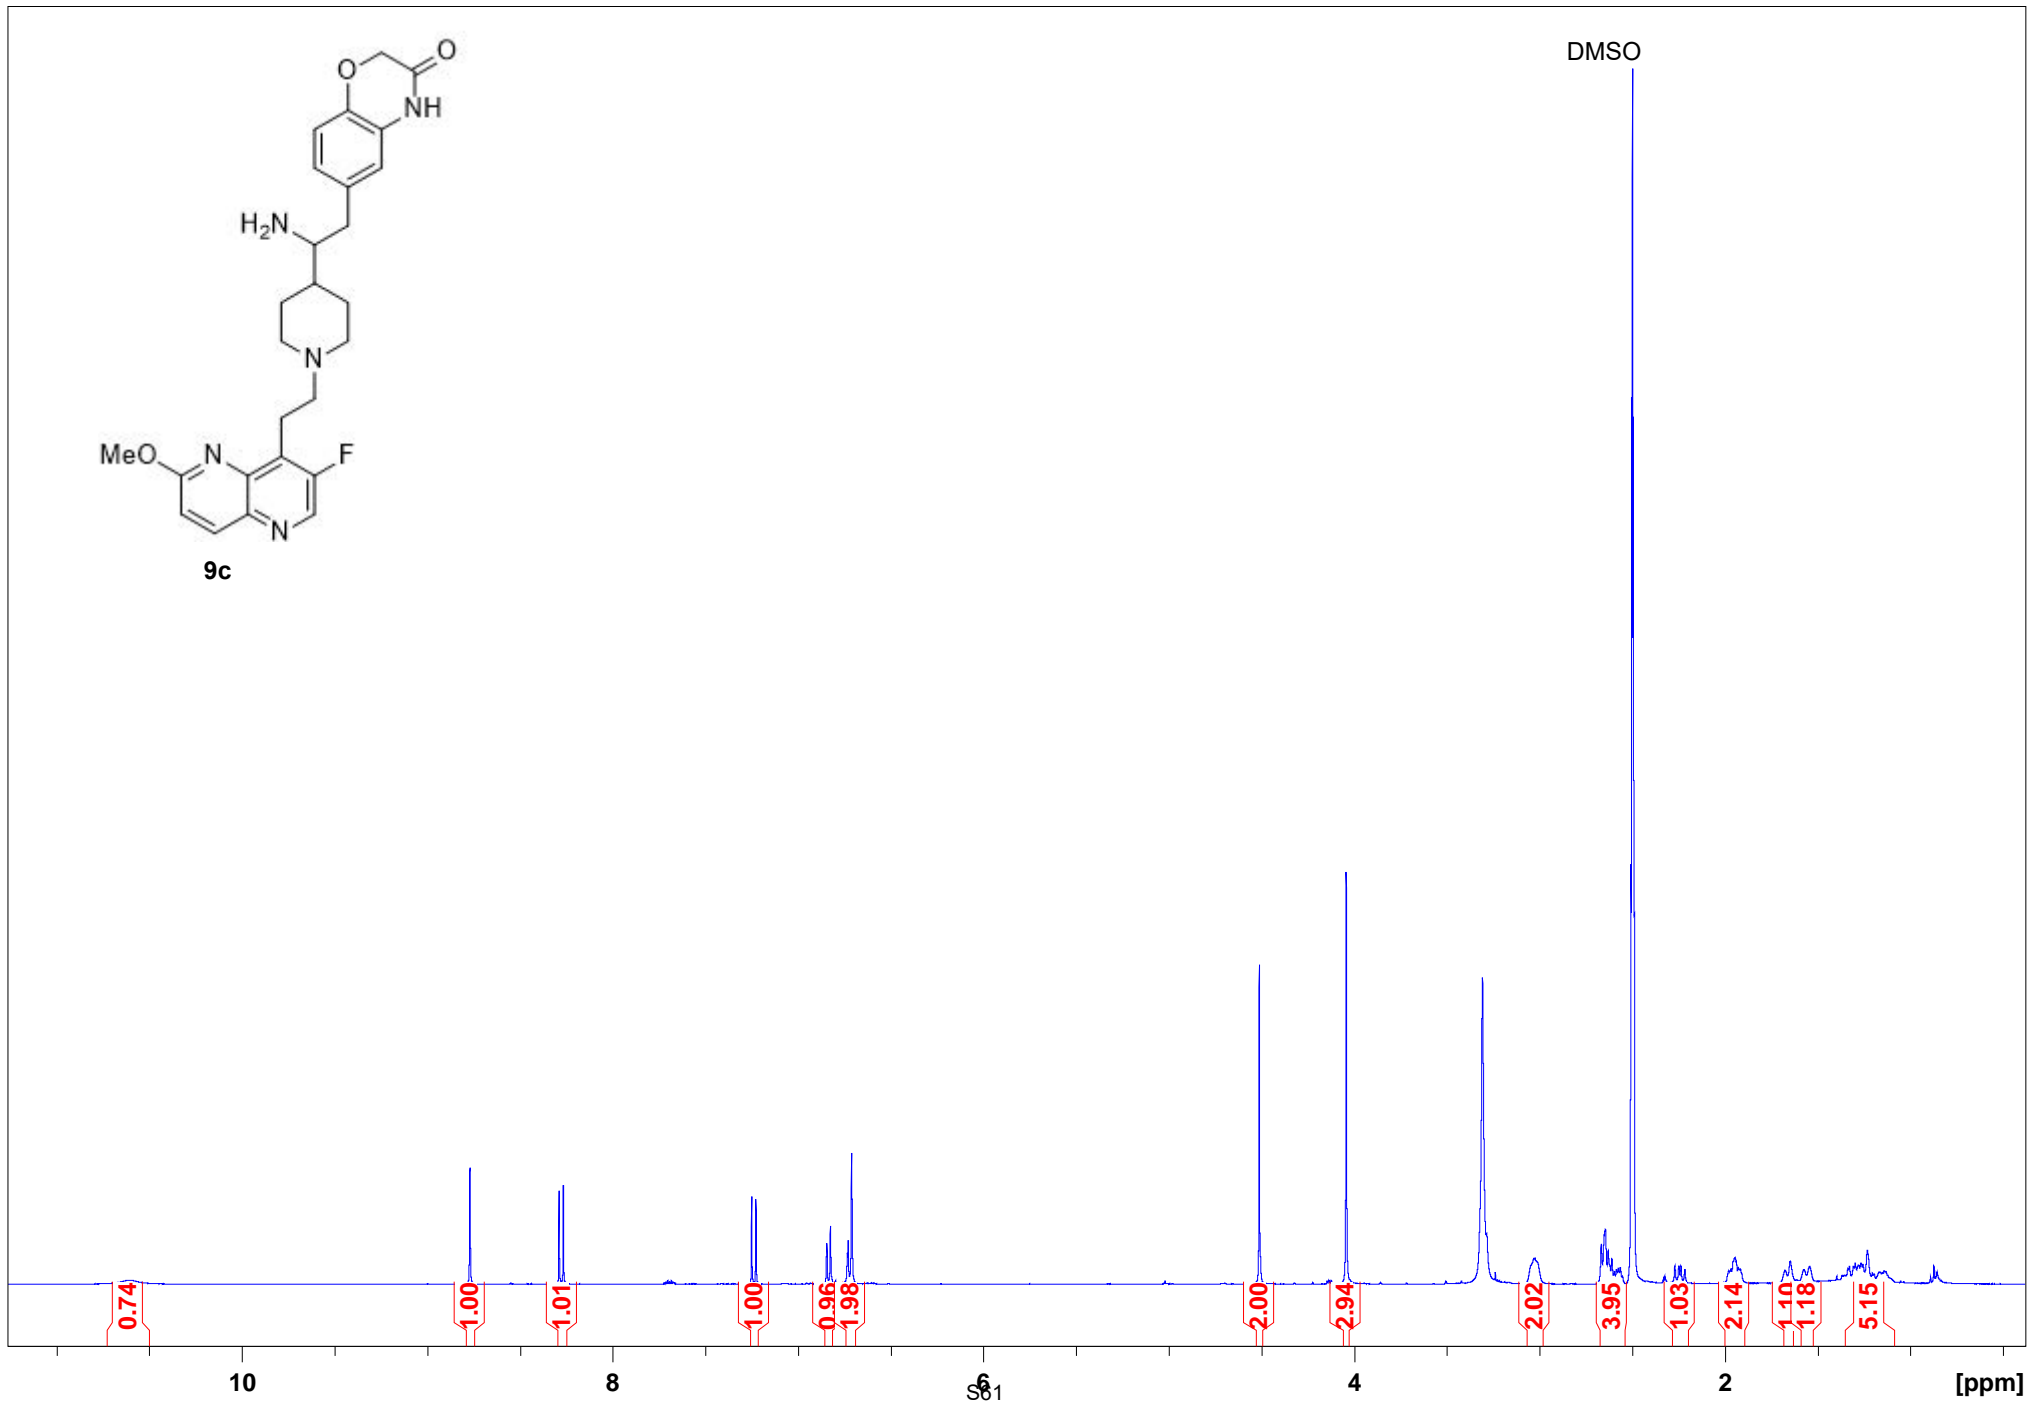

DMSO

- 164.9801
- 161.9769
- M 158.1085
- 155.5712

- 141.3943
- 140.9572
- M 140.8873
- 140.4240
- 138.0949
- 138.0200
- 137.7412
- 134.5622
- 130.2020
- 130.0703
- 126.9248
- 123.6019

- 116.3026
- 115.7497
- 115.2958

- 66.7508

- 56.8785
- 56.6238
- 53.5504
- M 53.3631
- 53.3255

- 28.8058
- 26.8495

- 20.7183

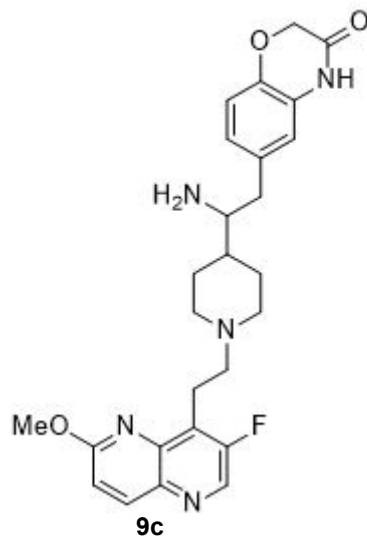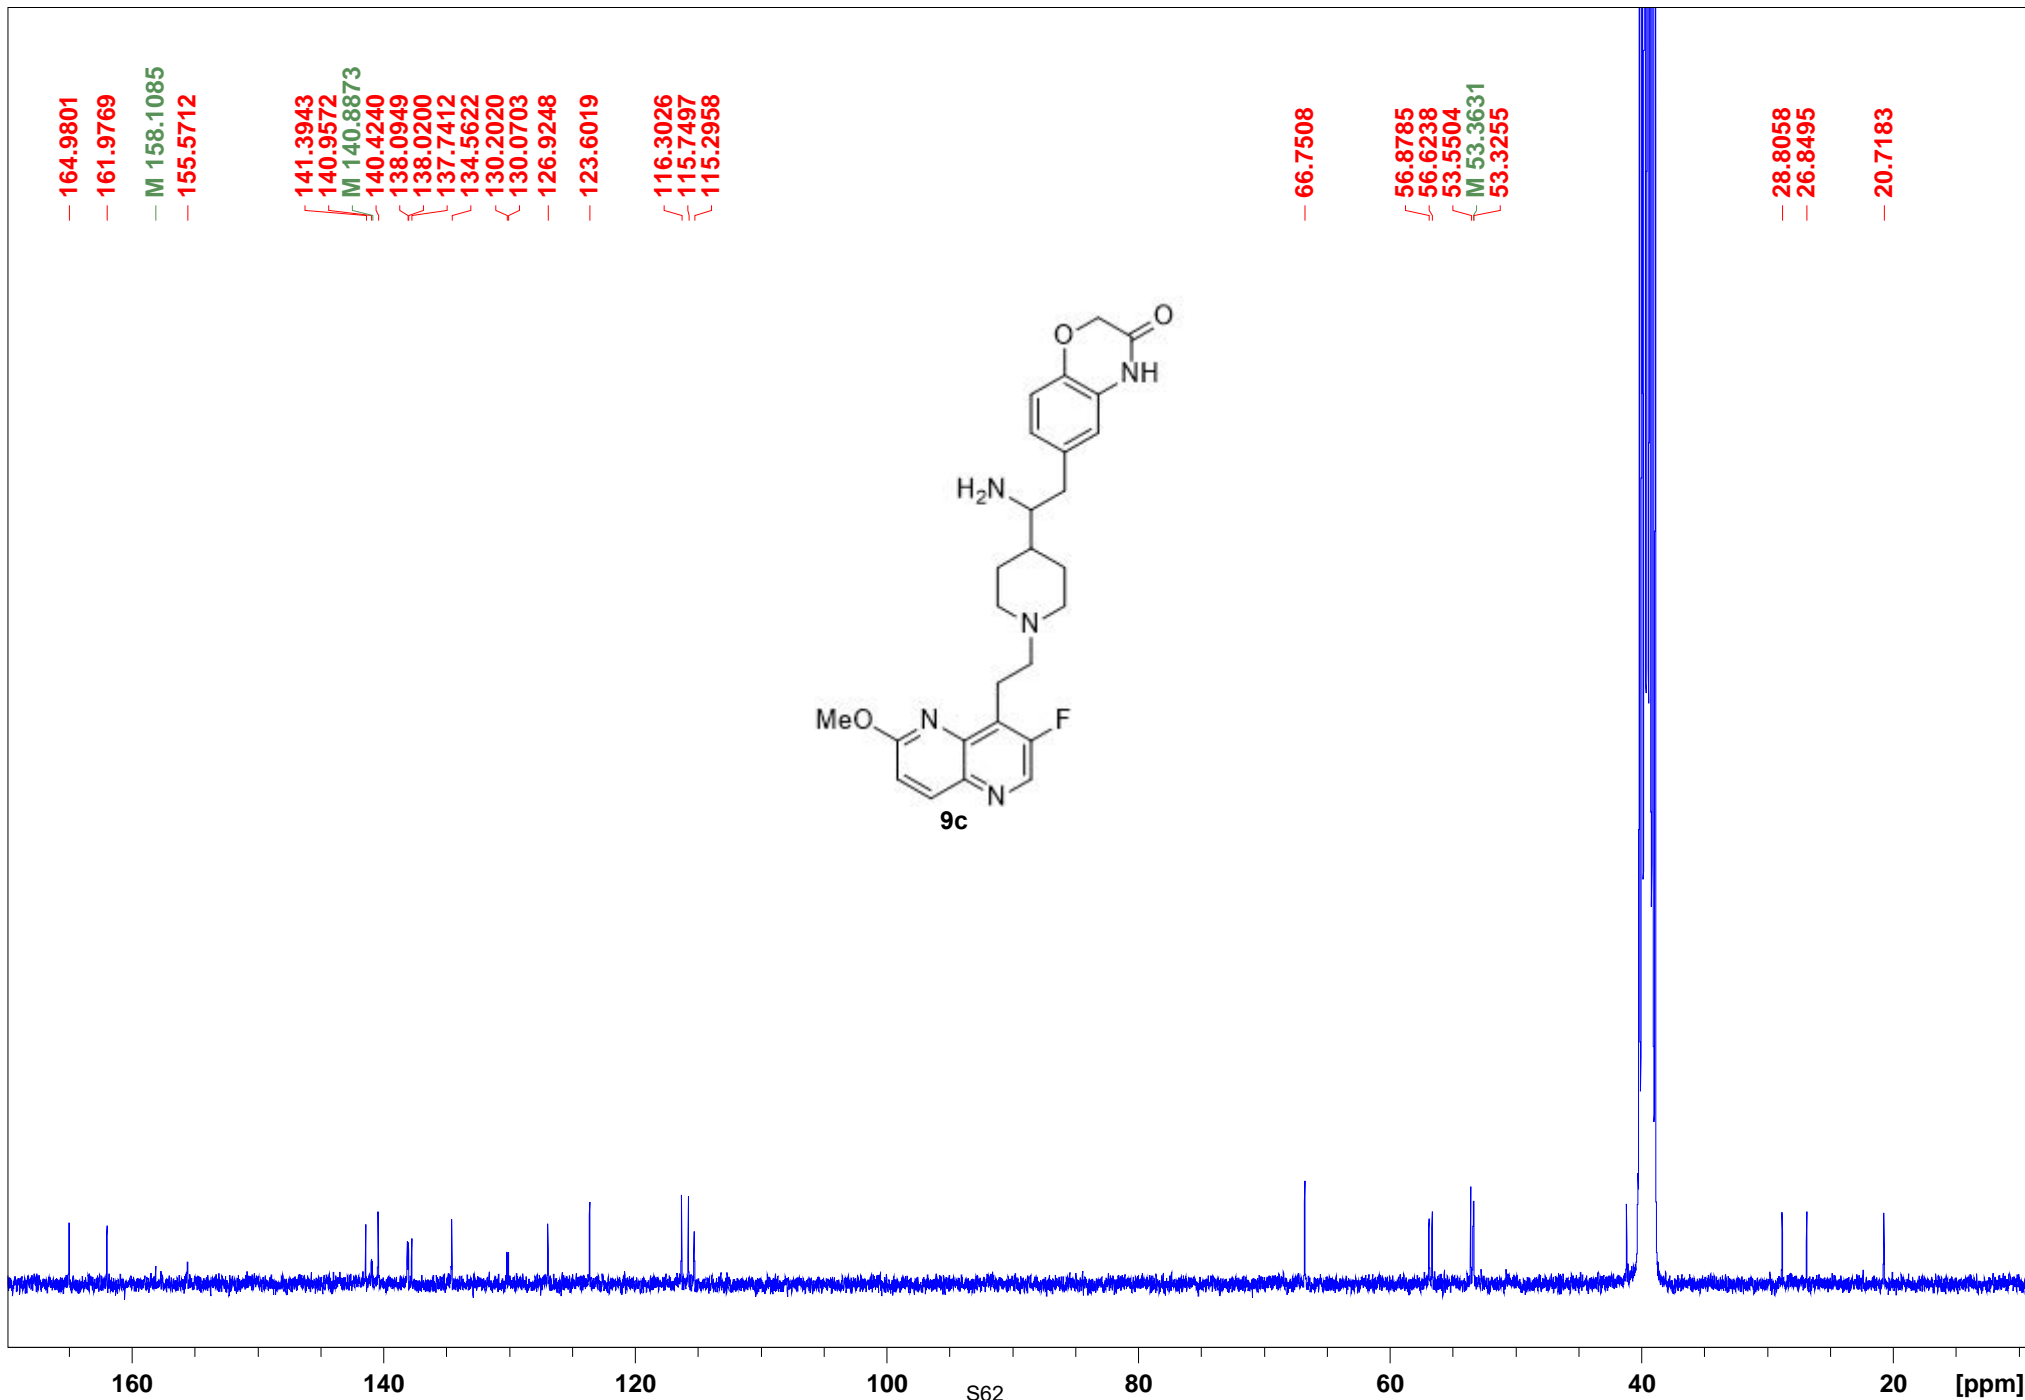

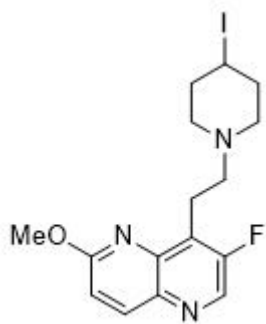

11

Chloroform

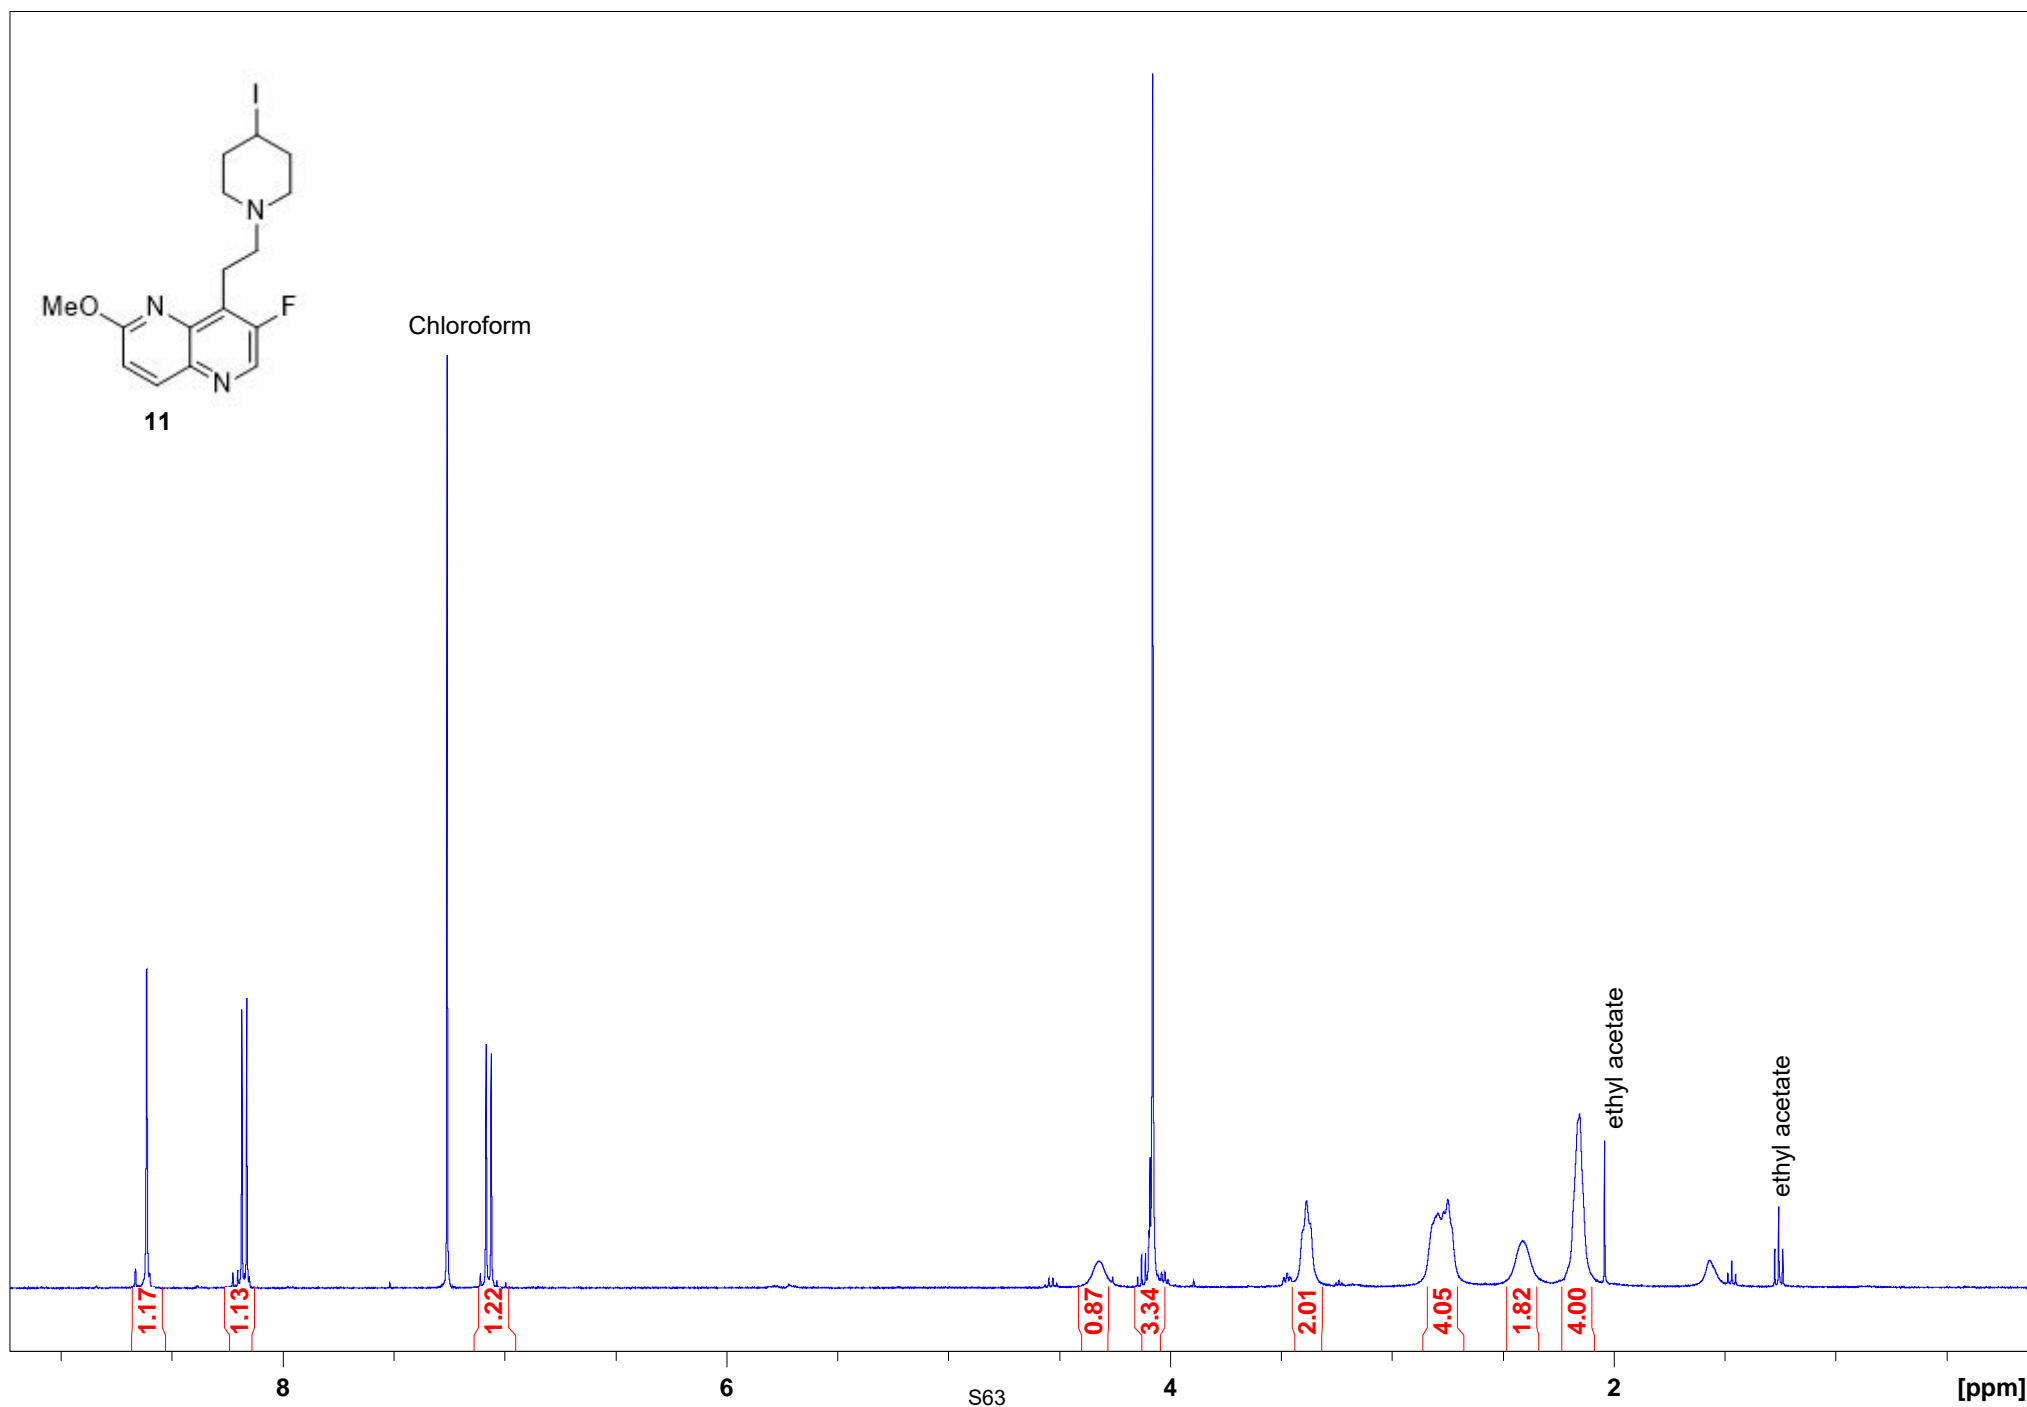

[ppm]

water

Methanol

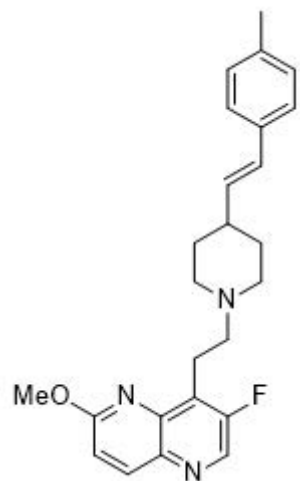

13a

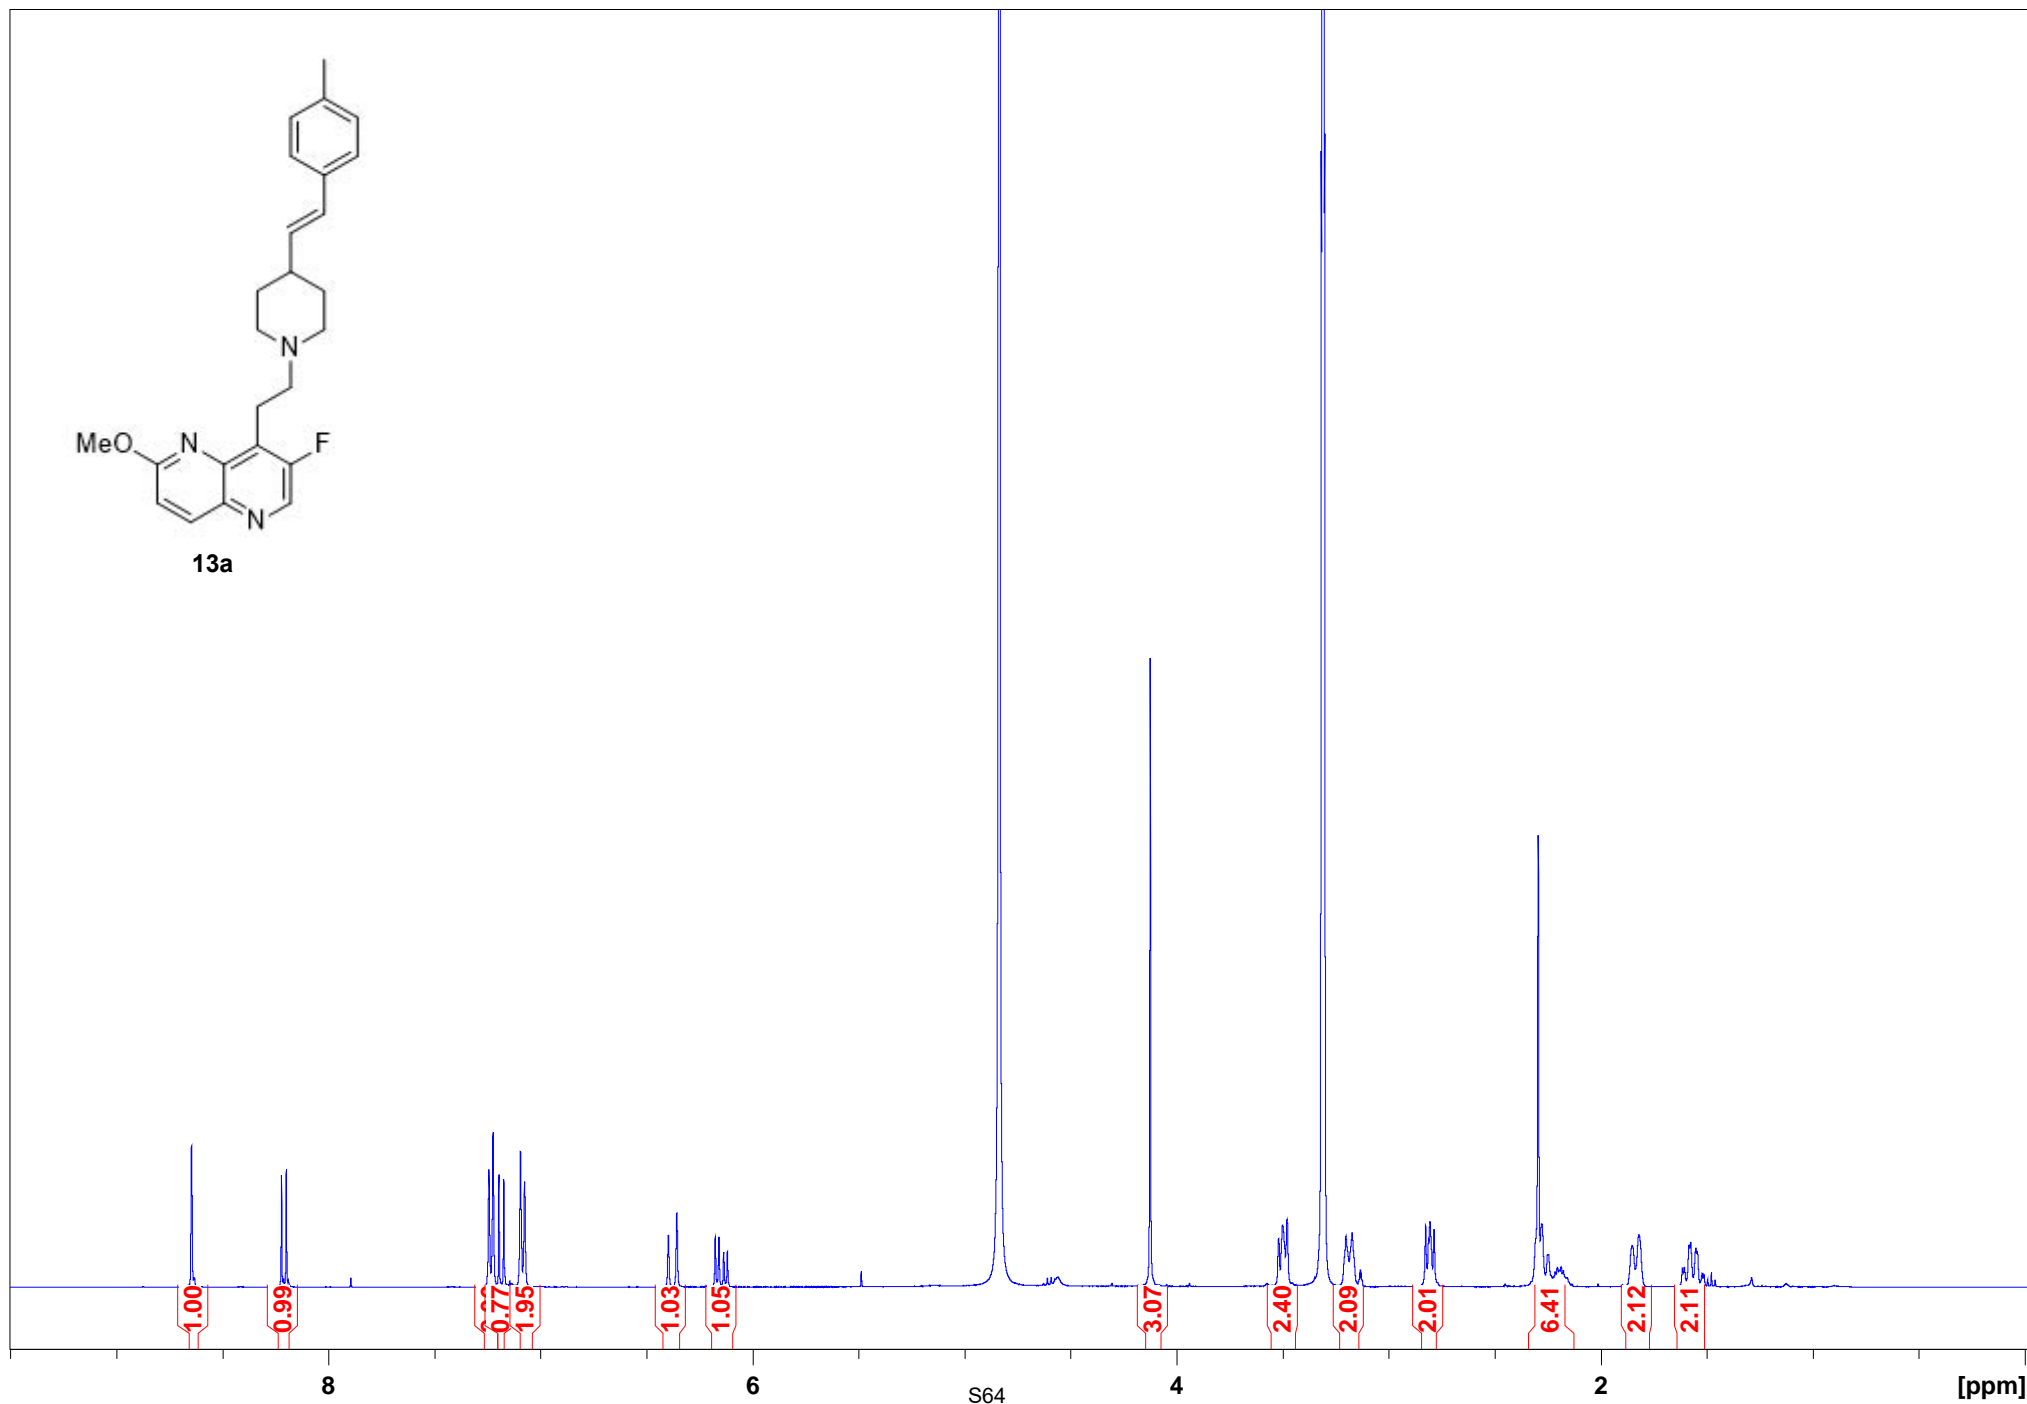

[ppm]



Chloroform

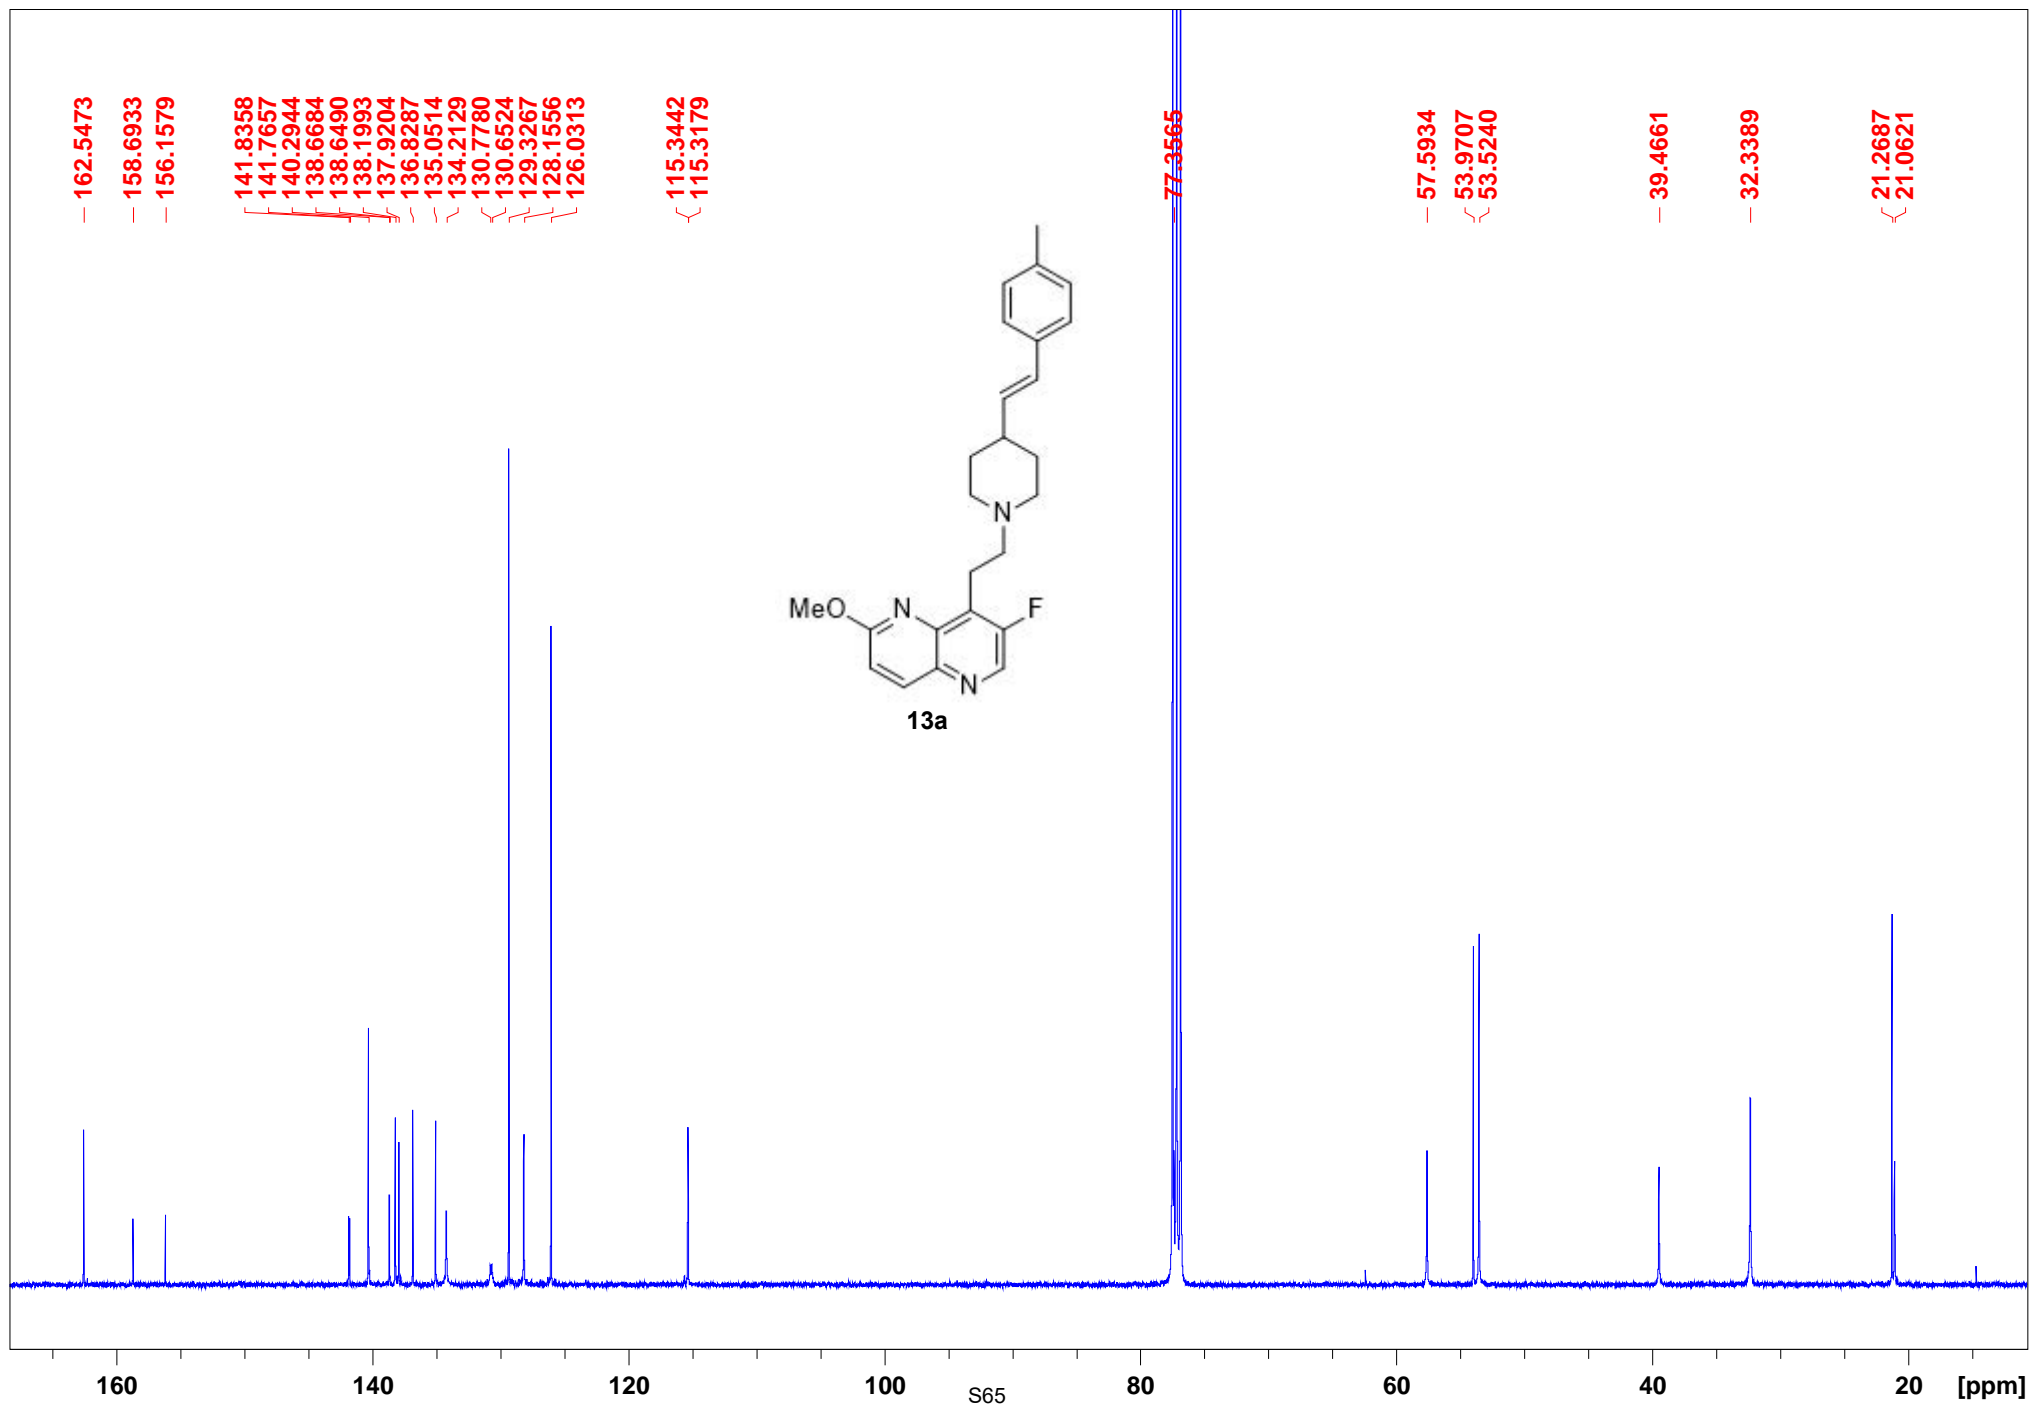

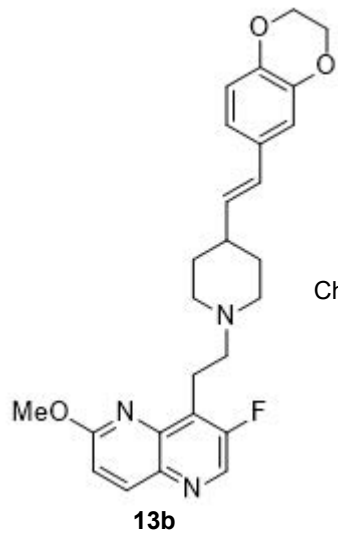

Chloroform

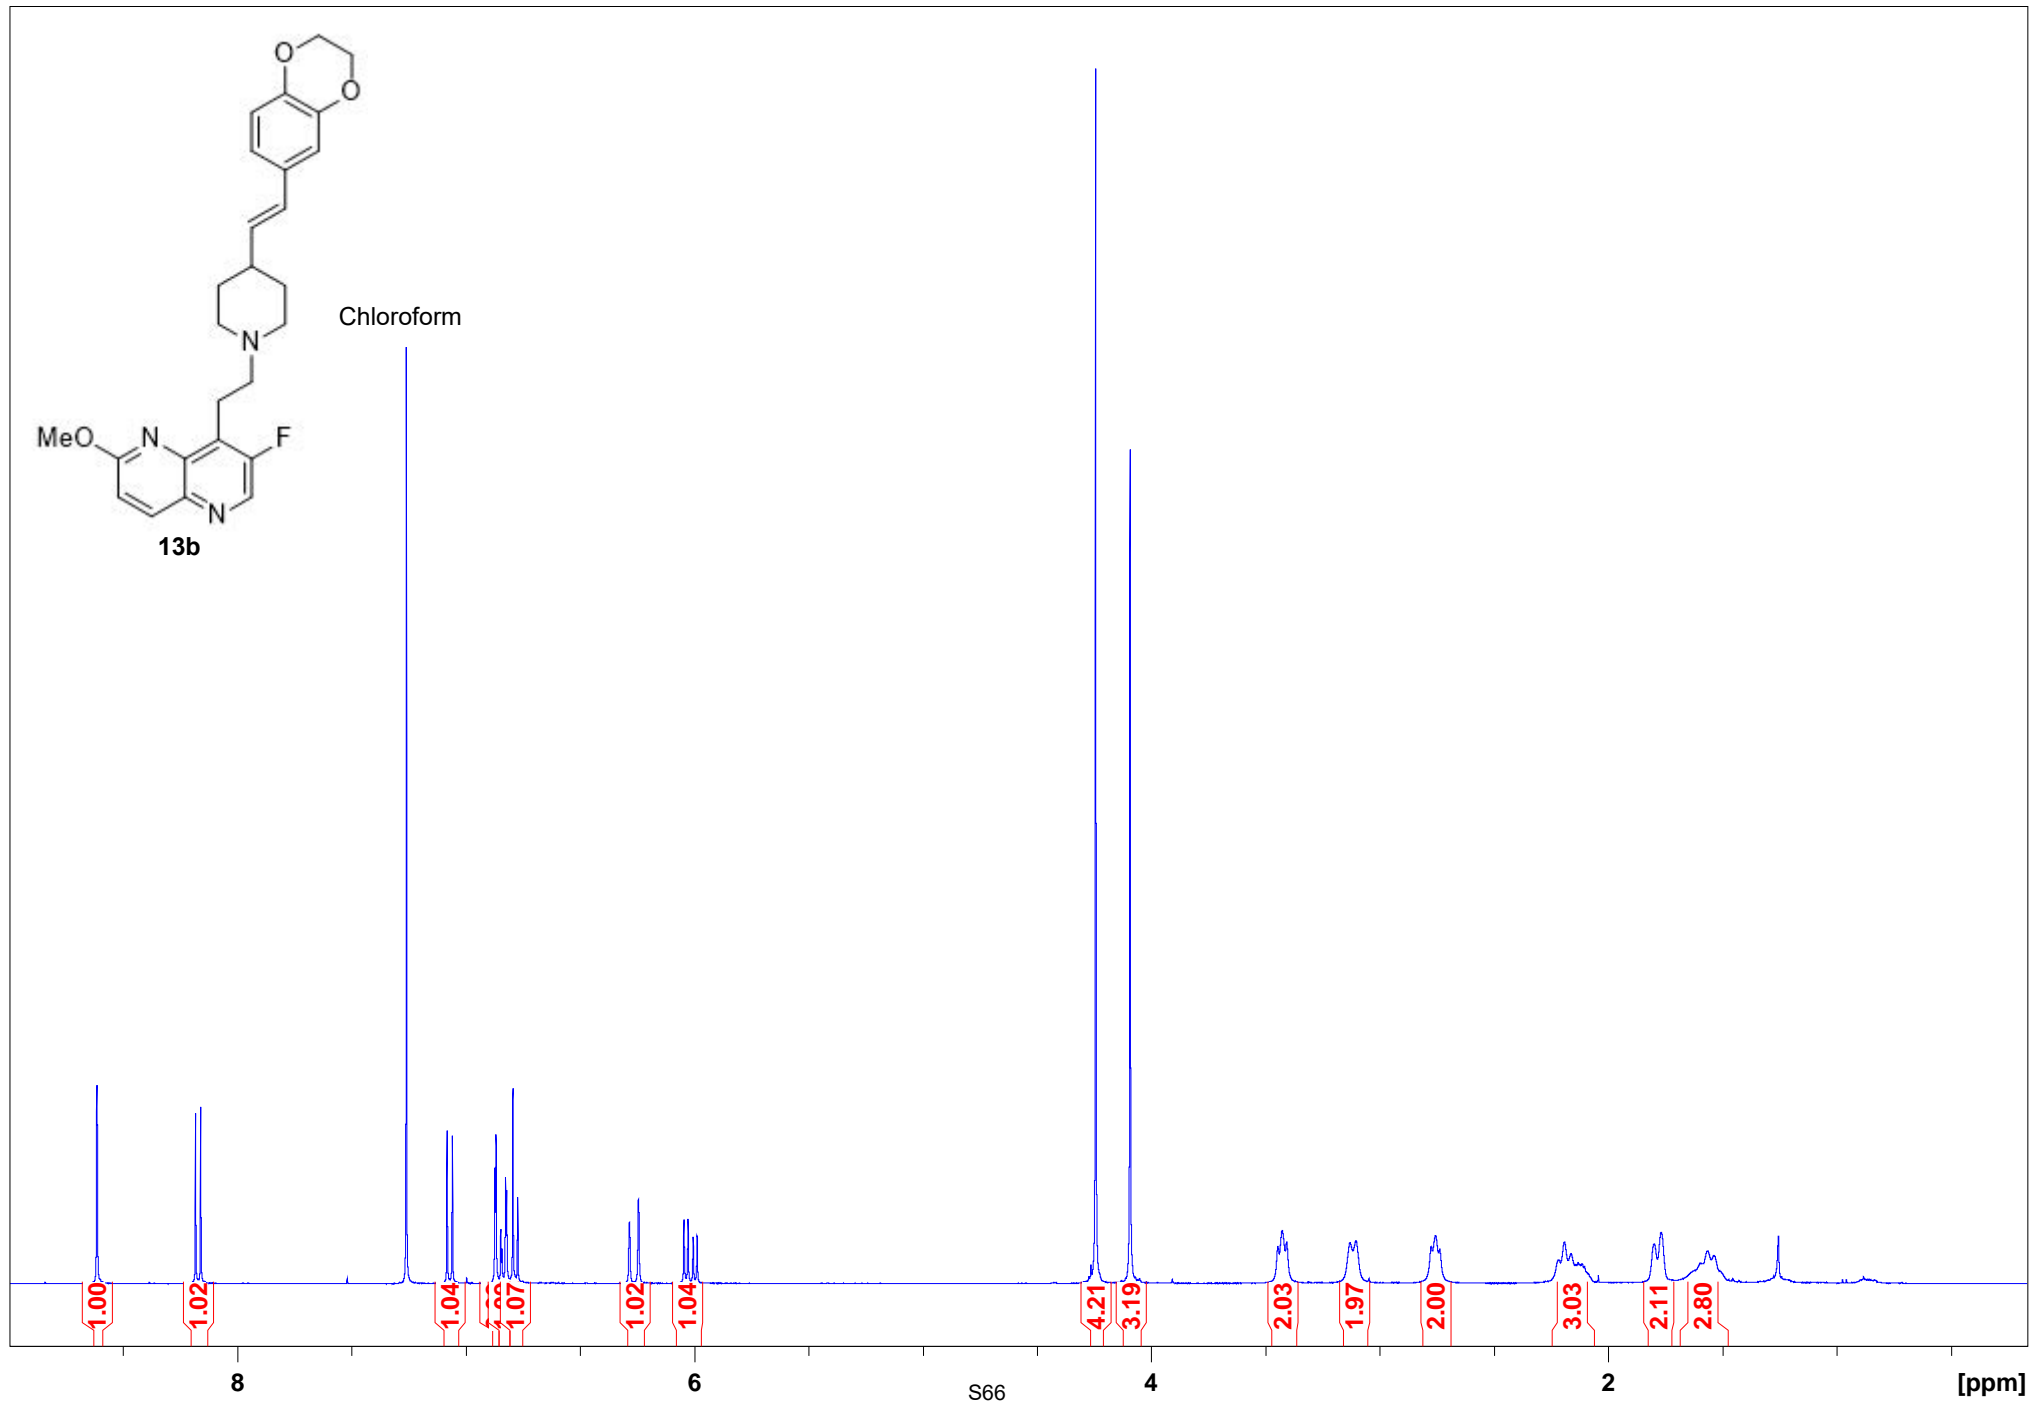

Chloroform

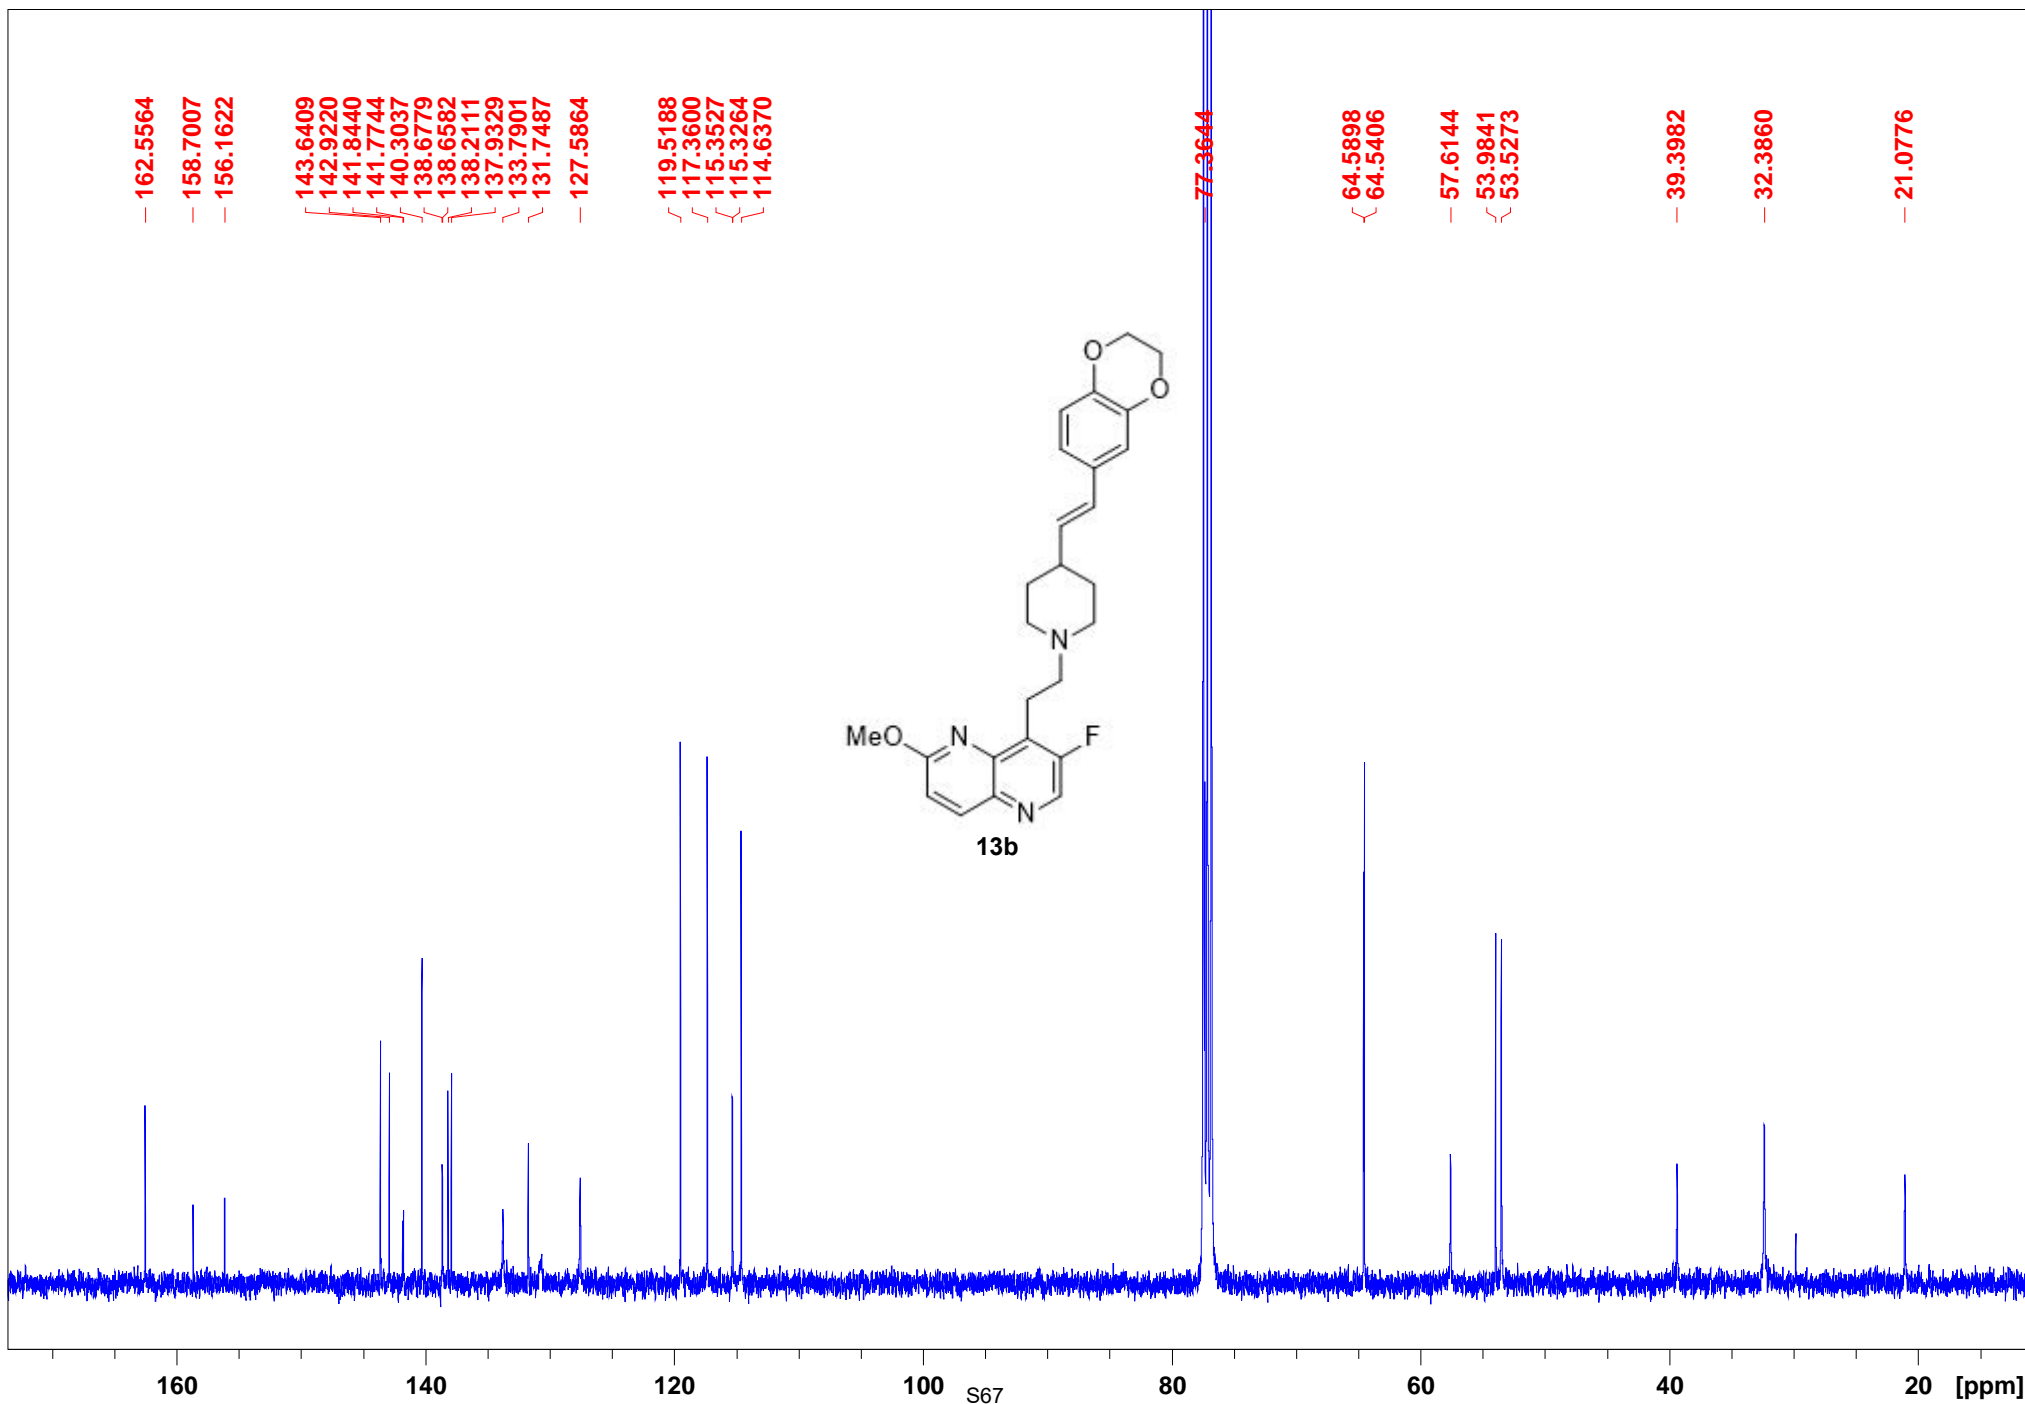

Chloroform

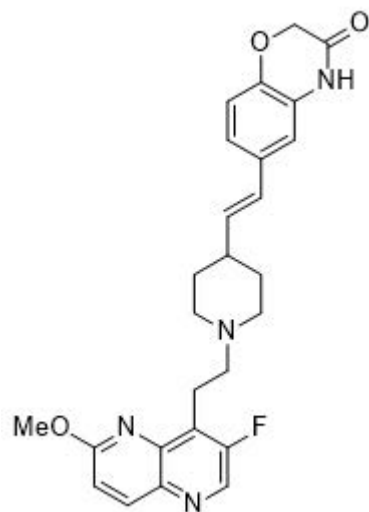

13c

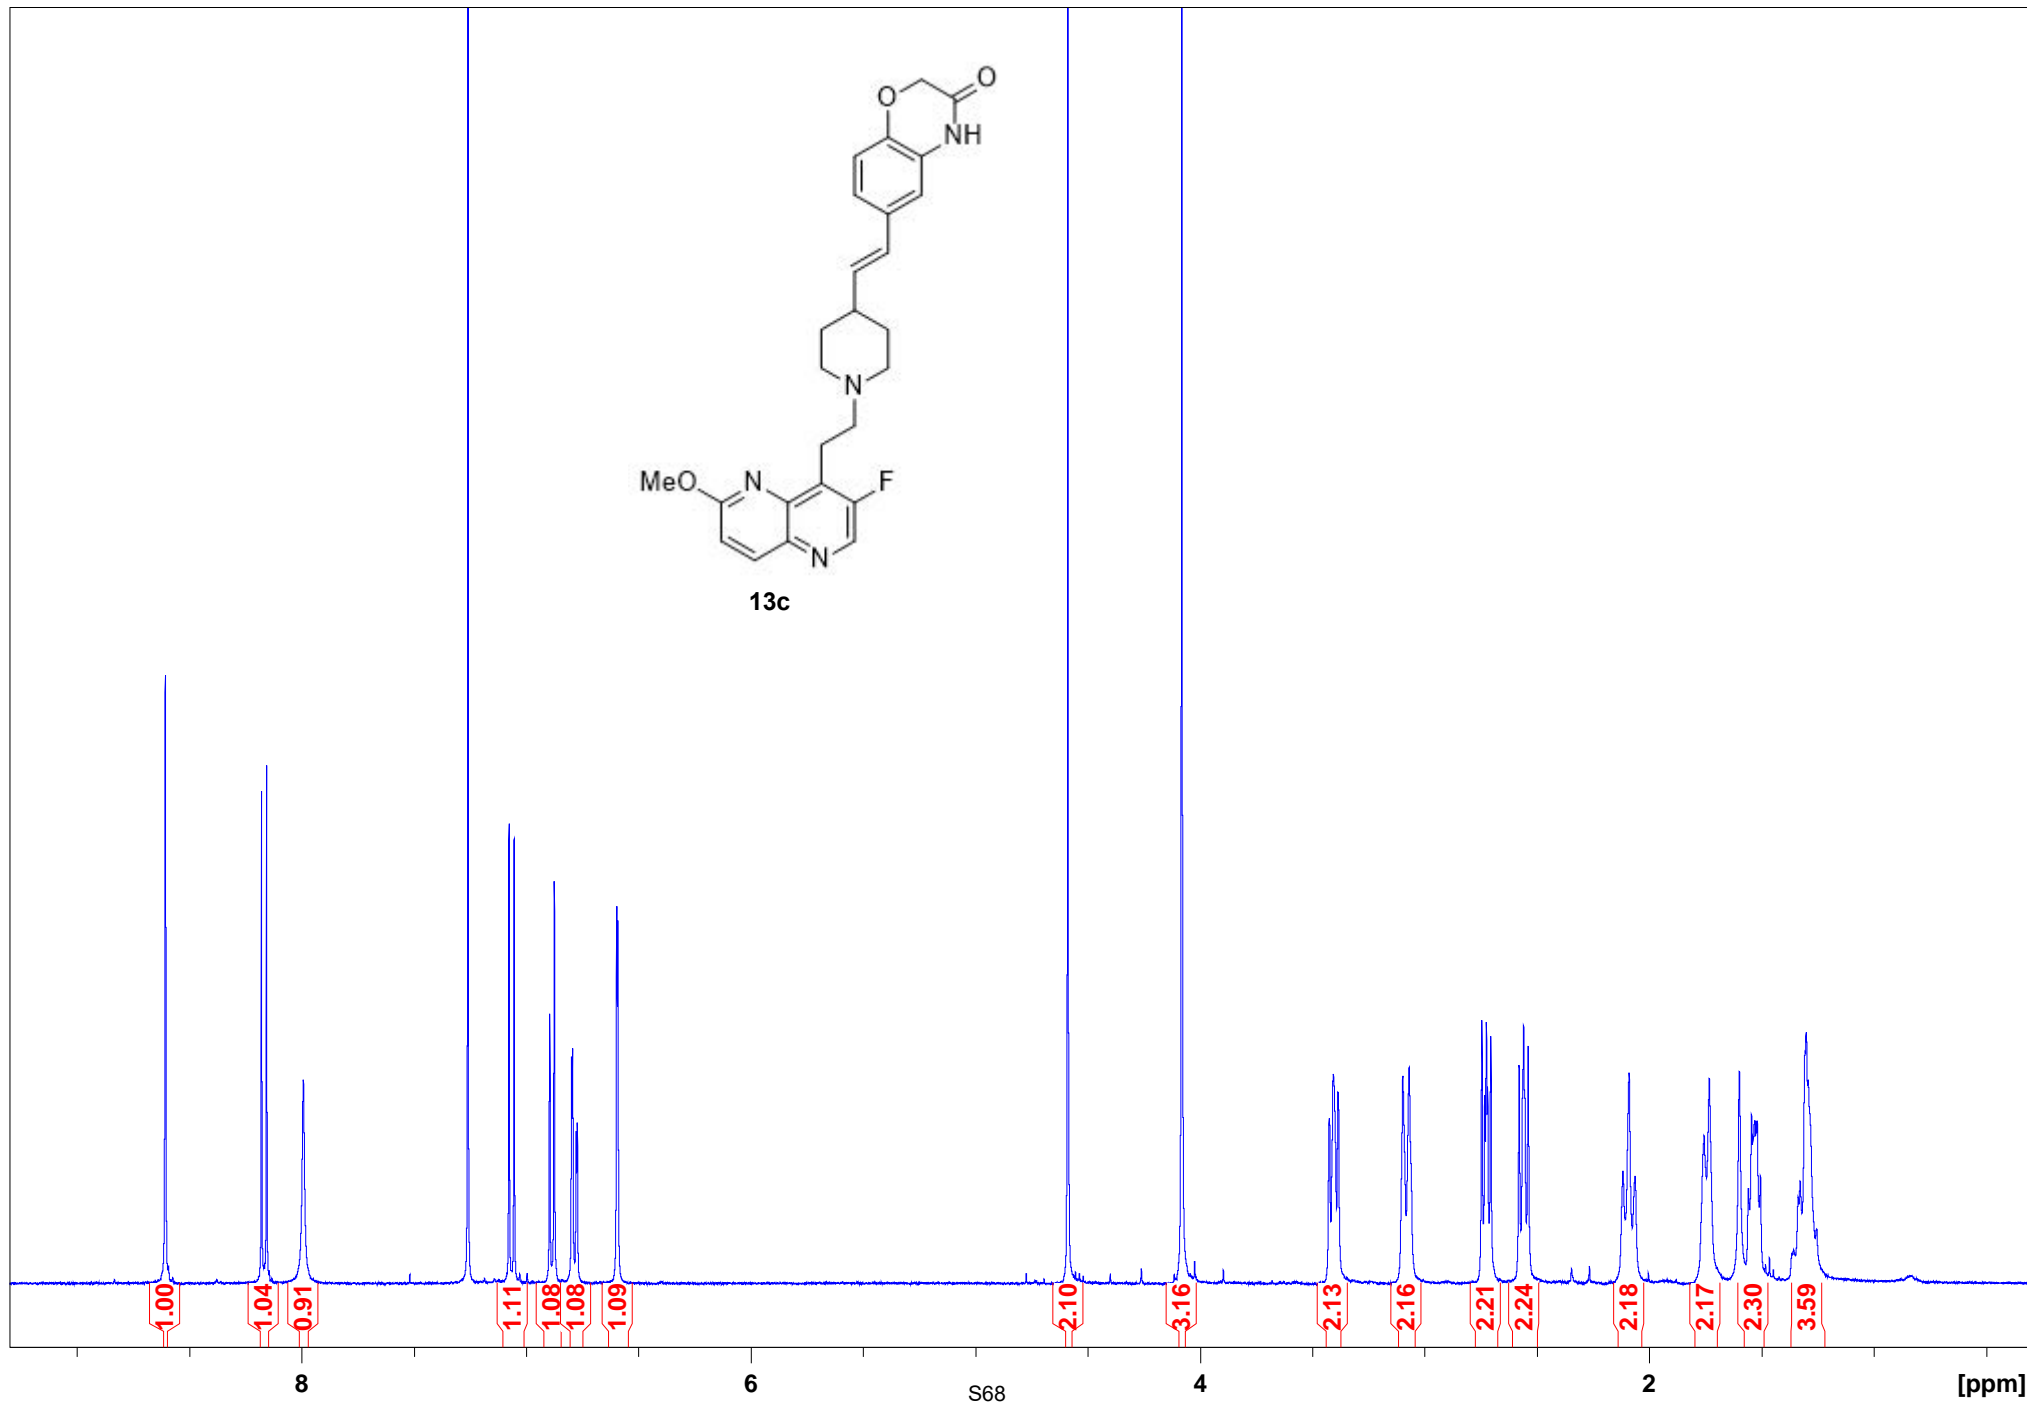

Chloroform

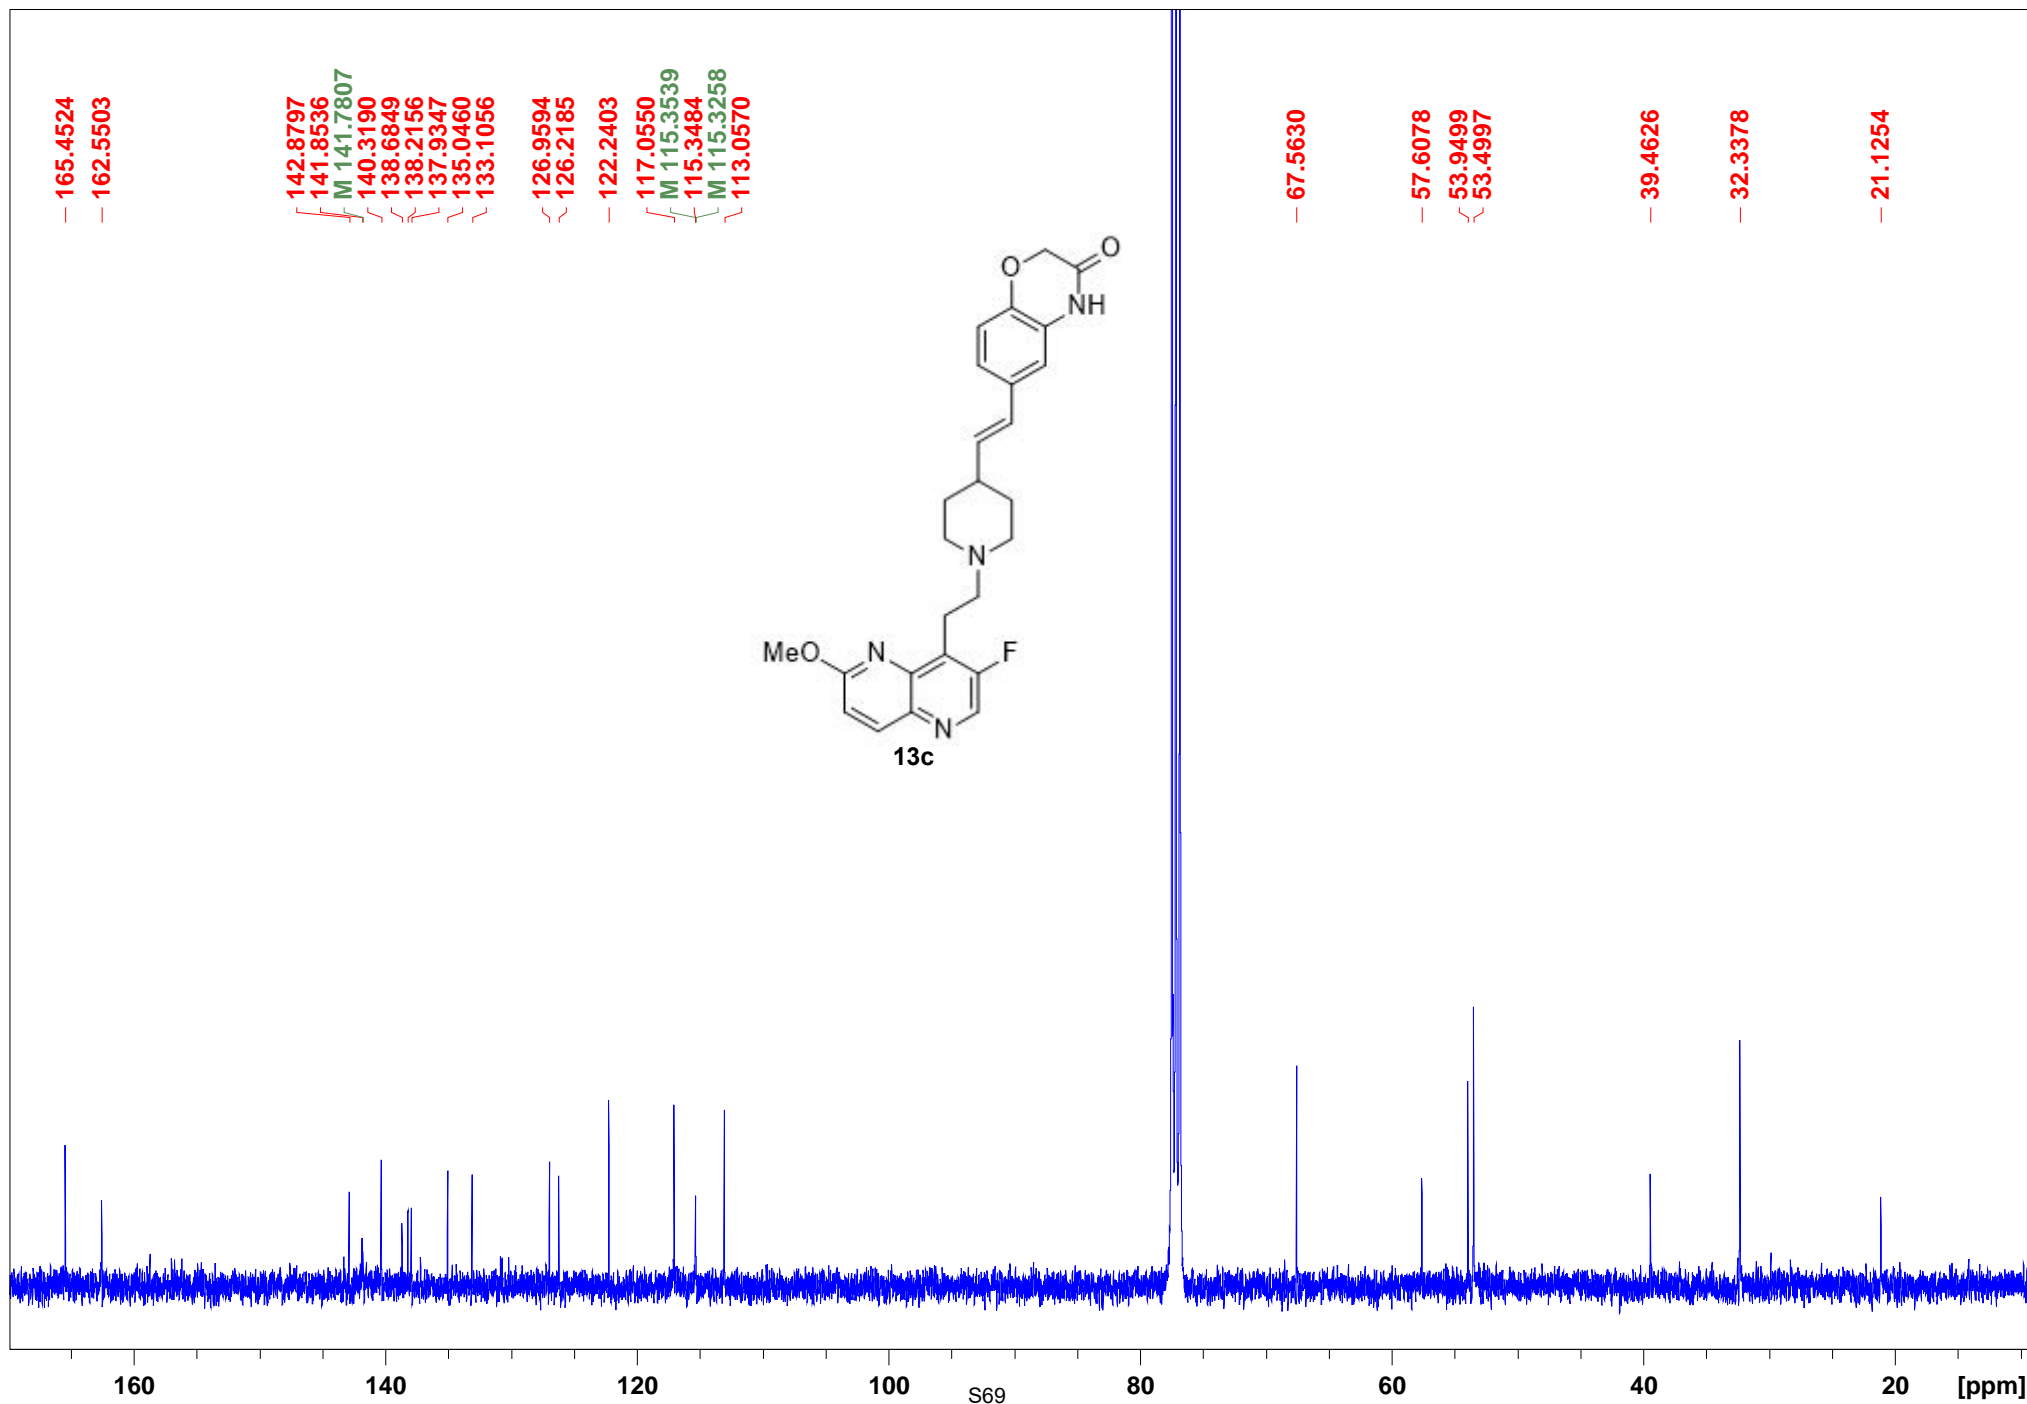

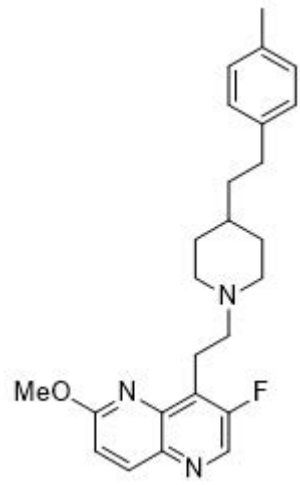

14a

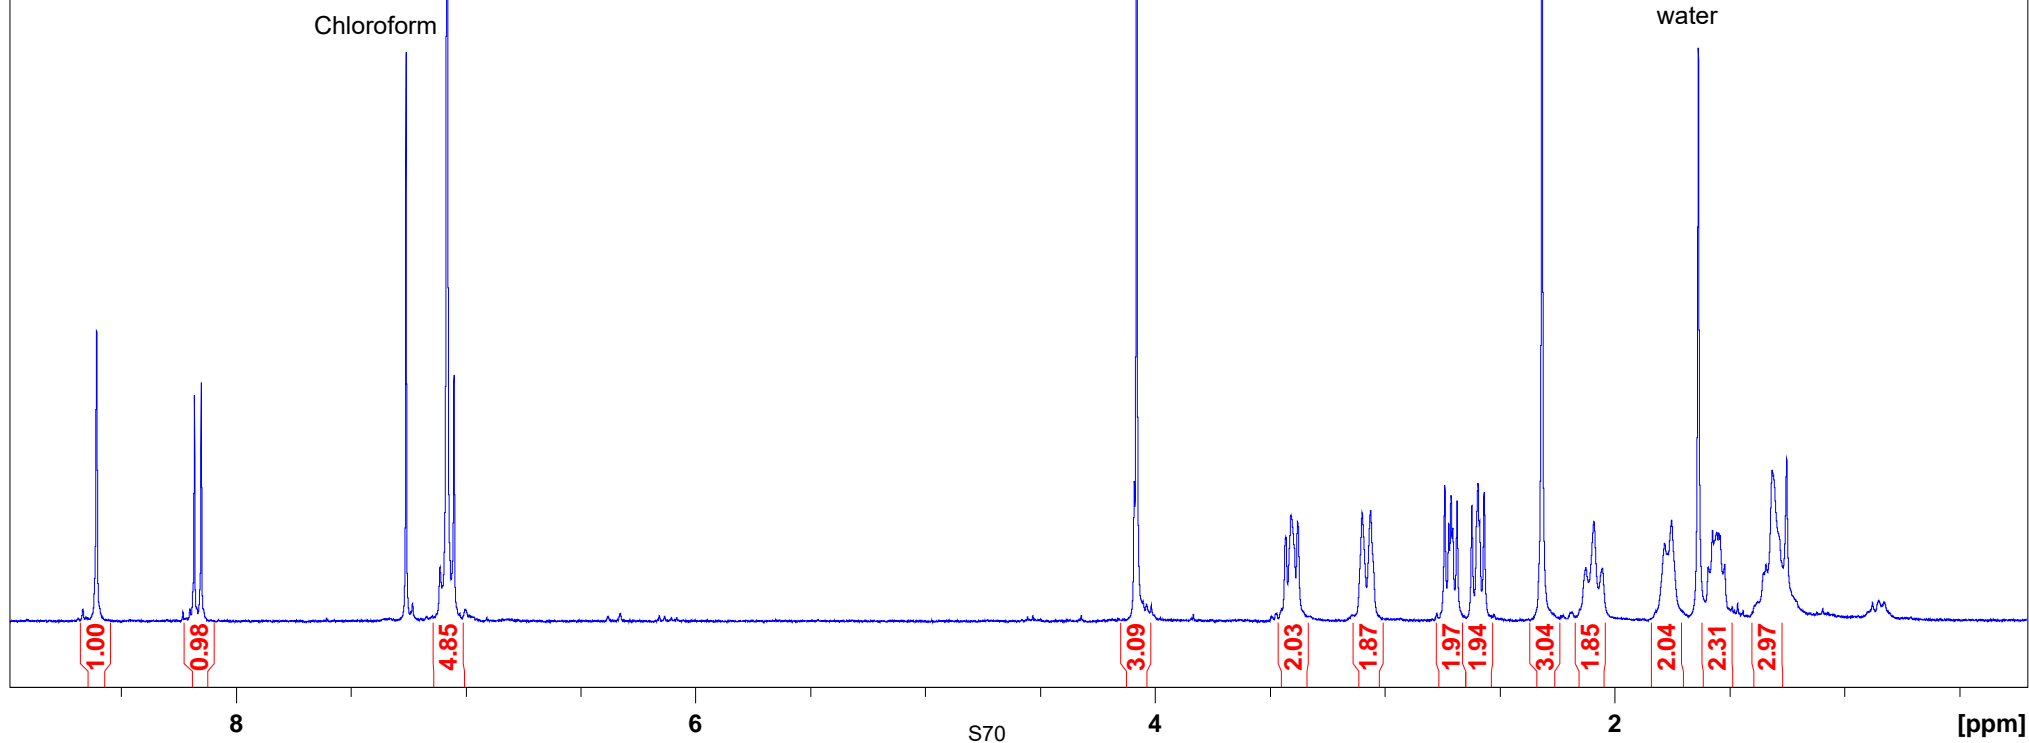

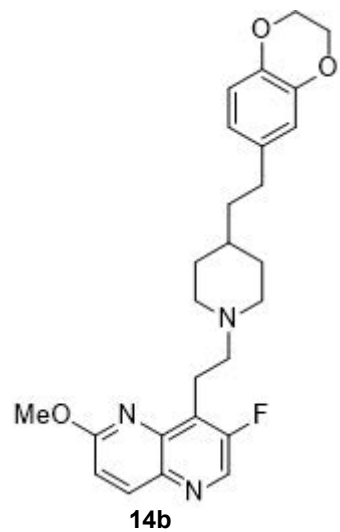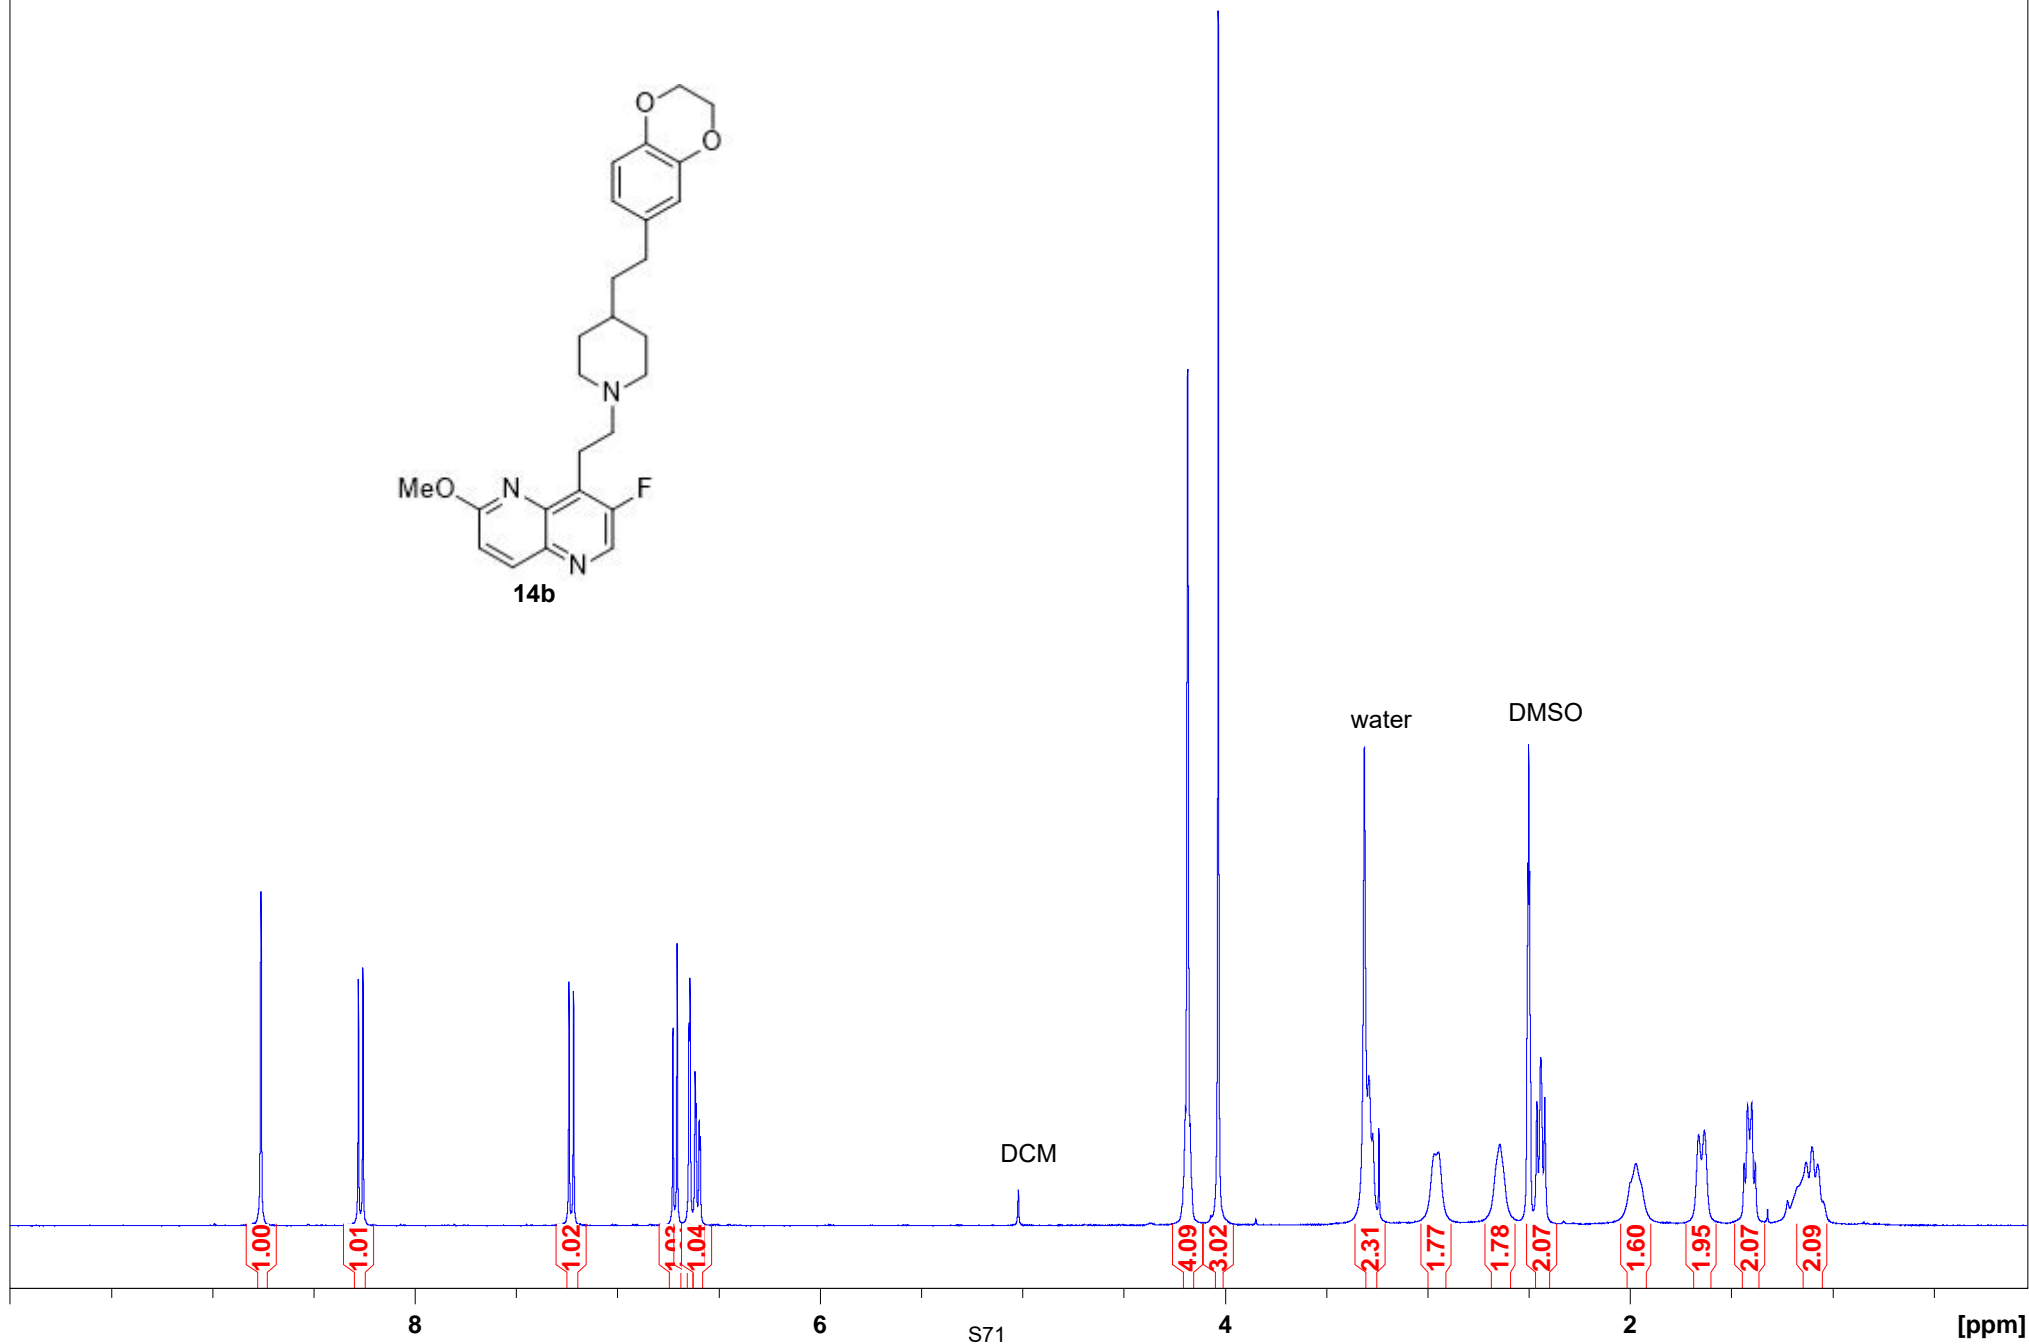

DMSO

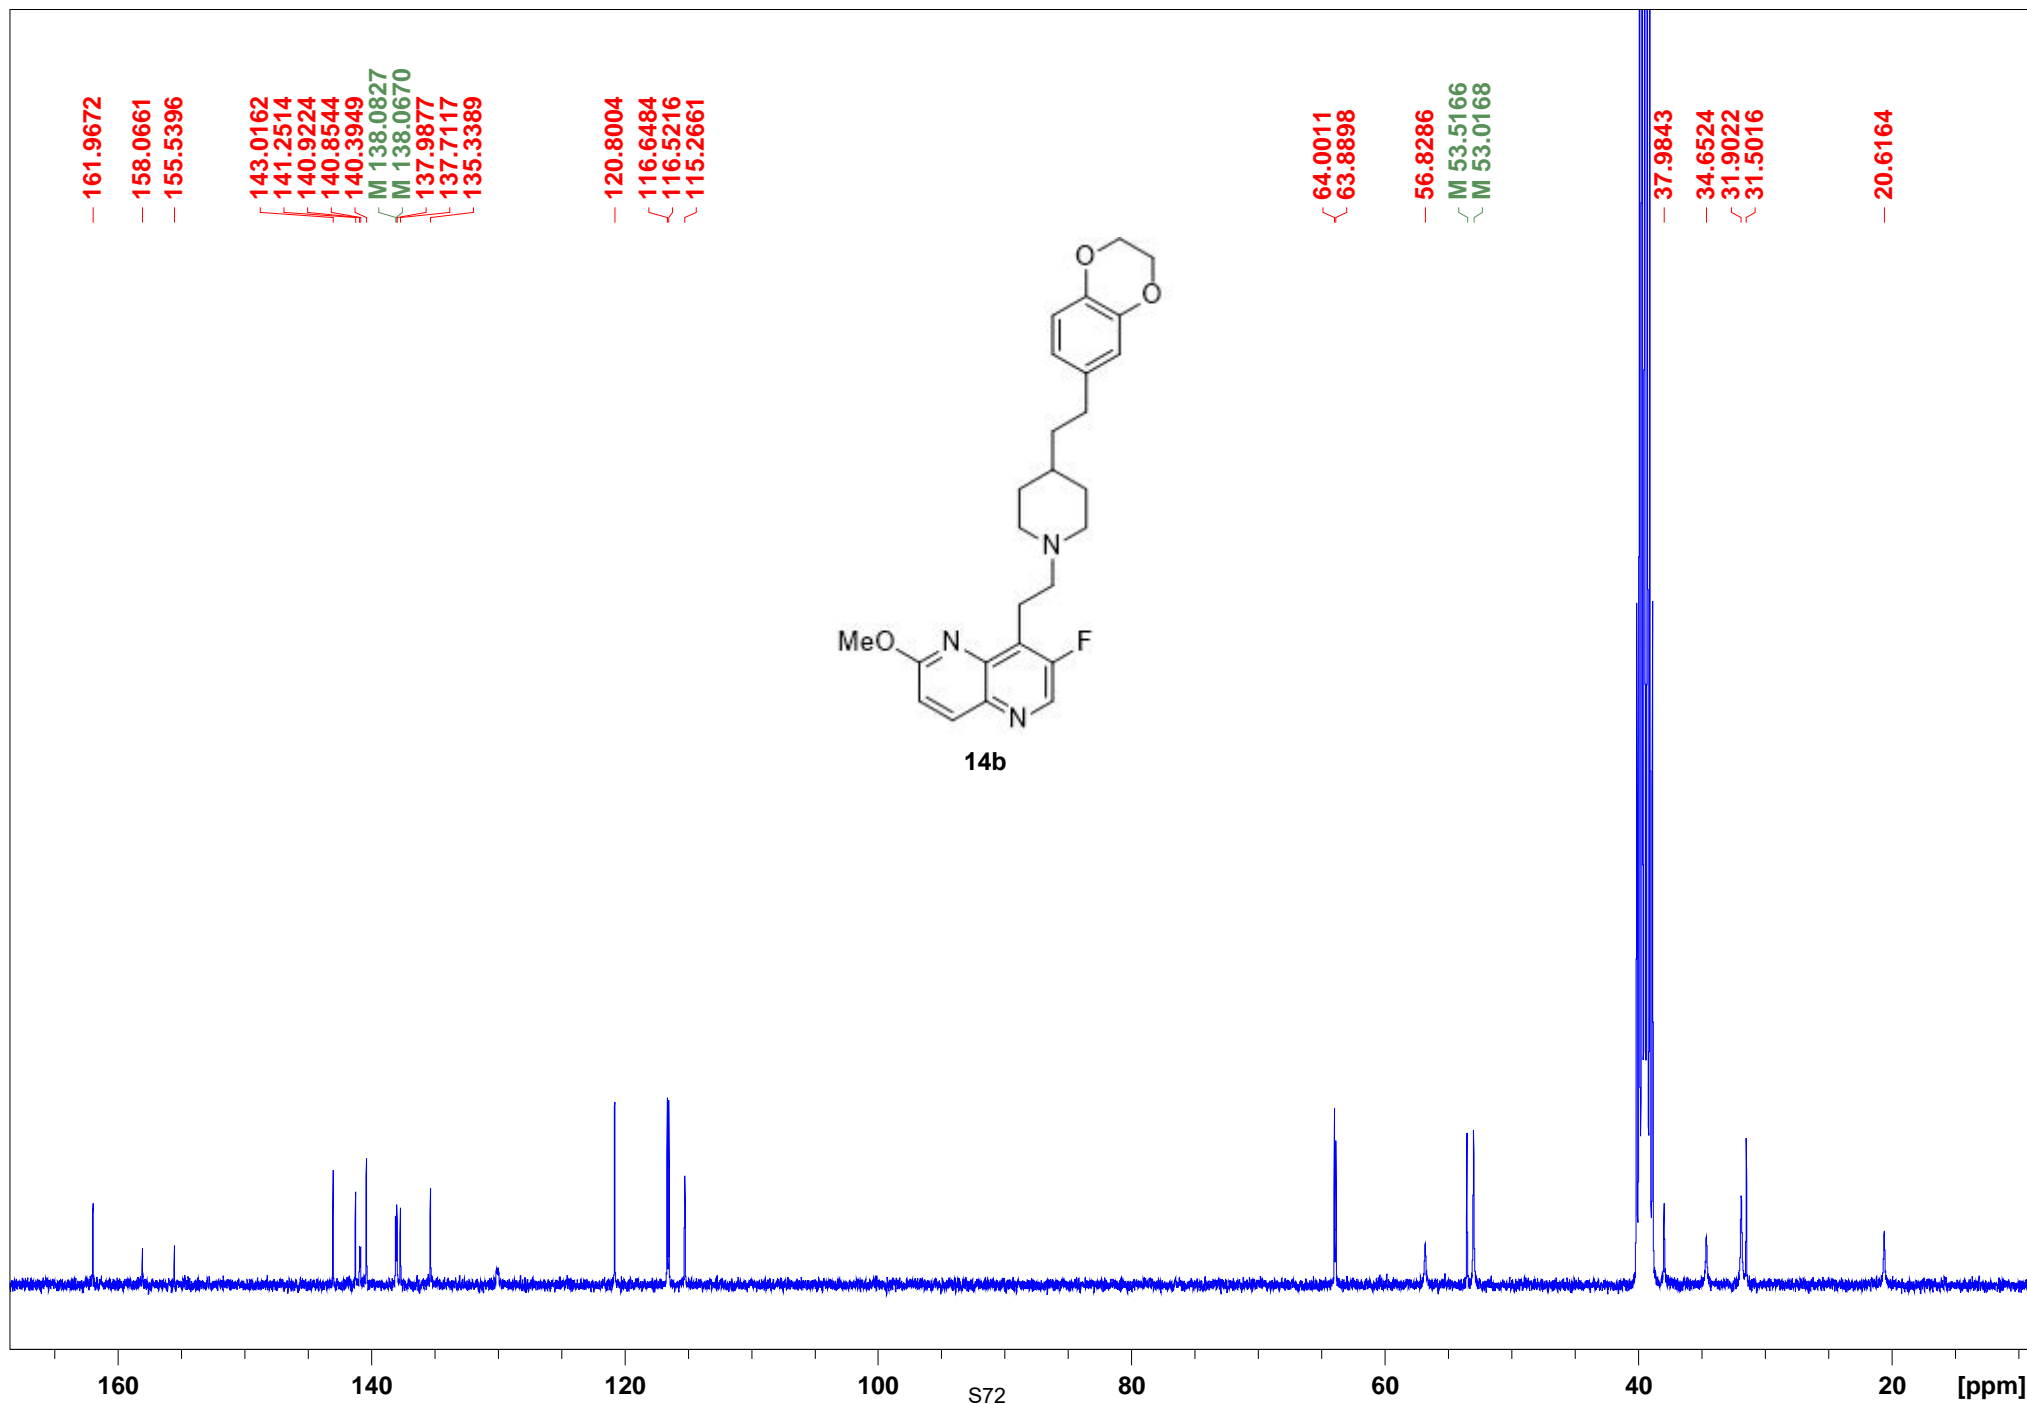



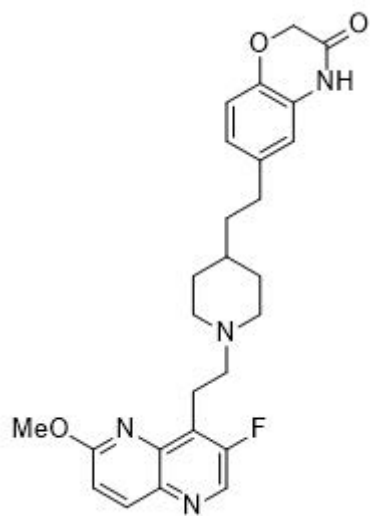

14c

Chloroform

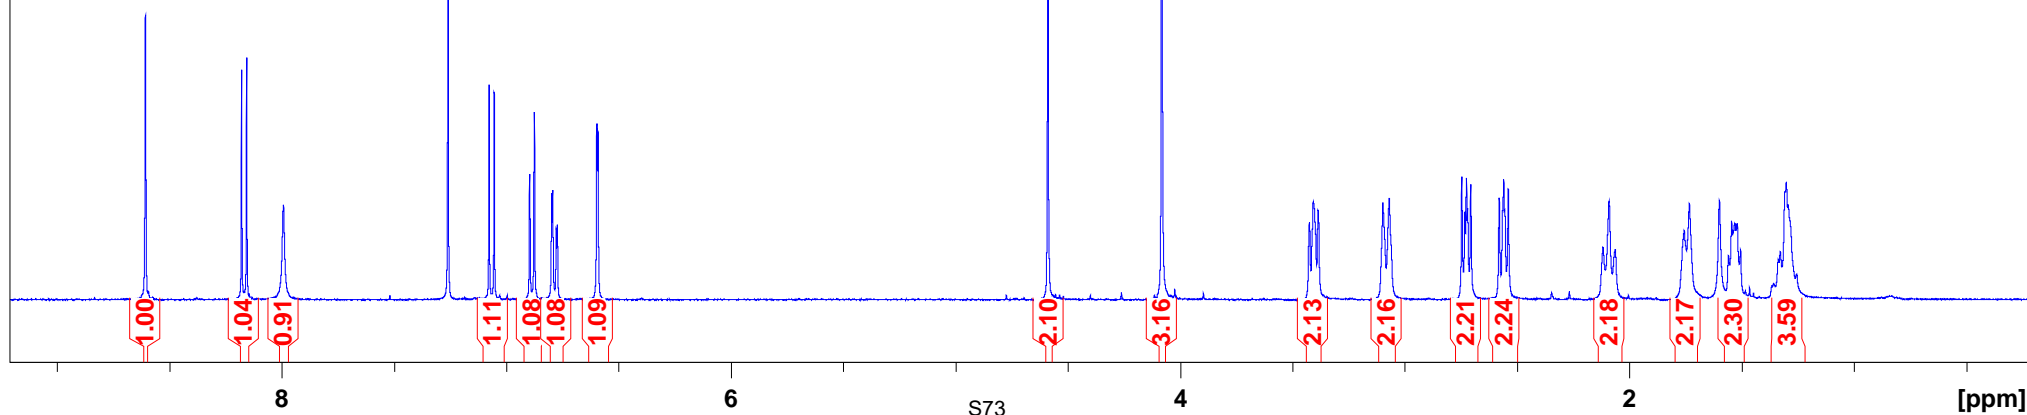

Chloroform

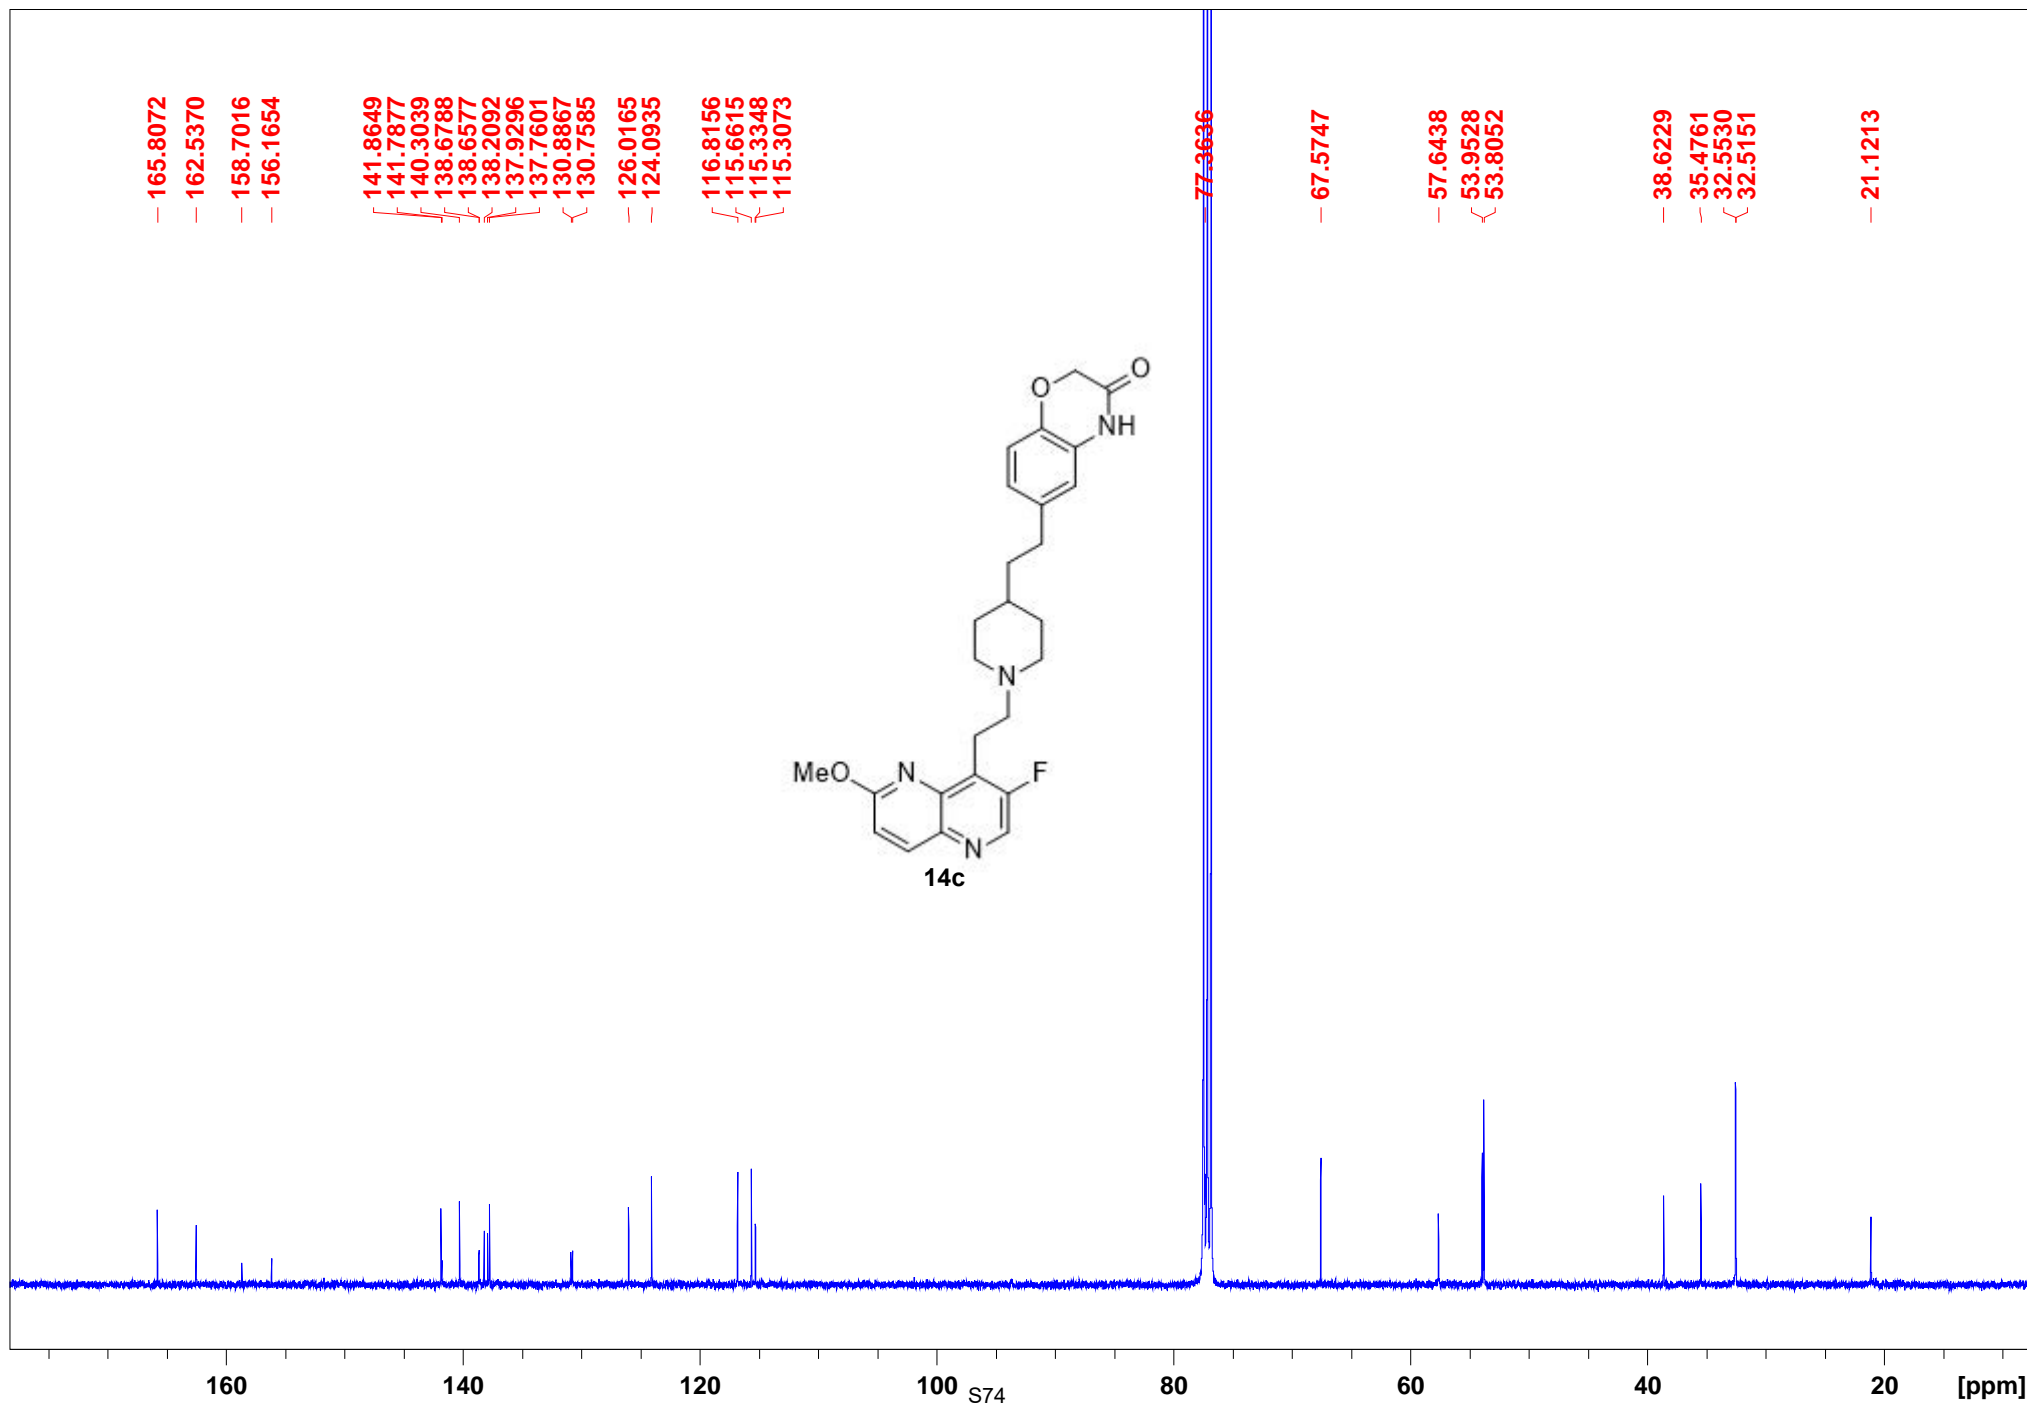

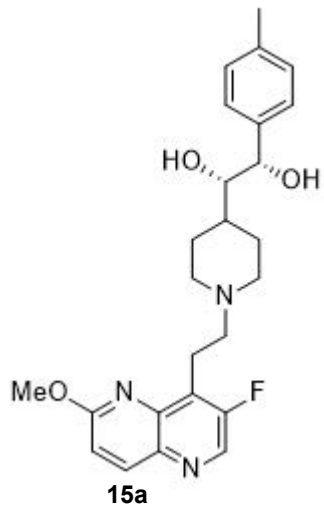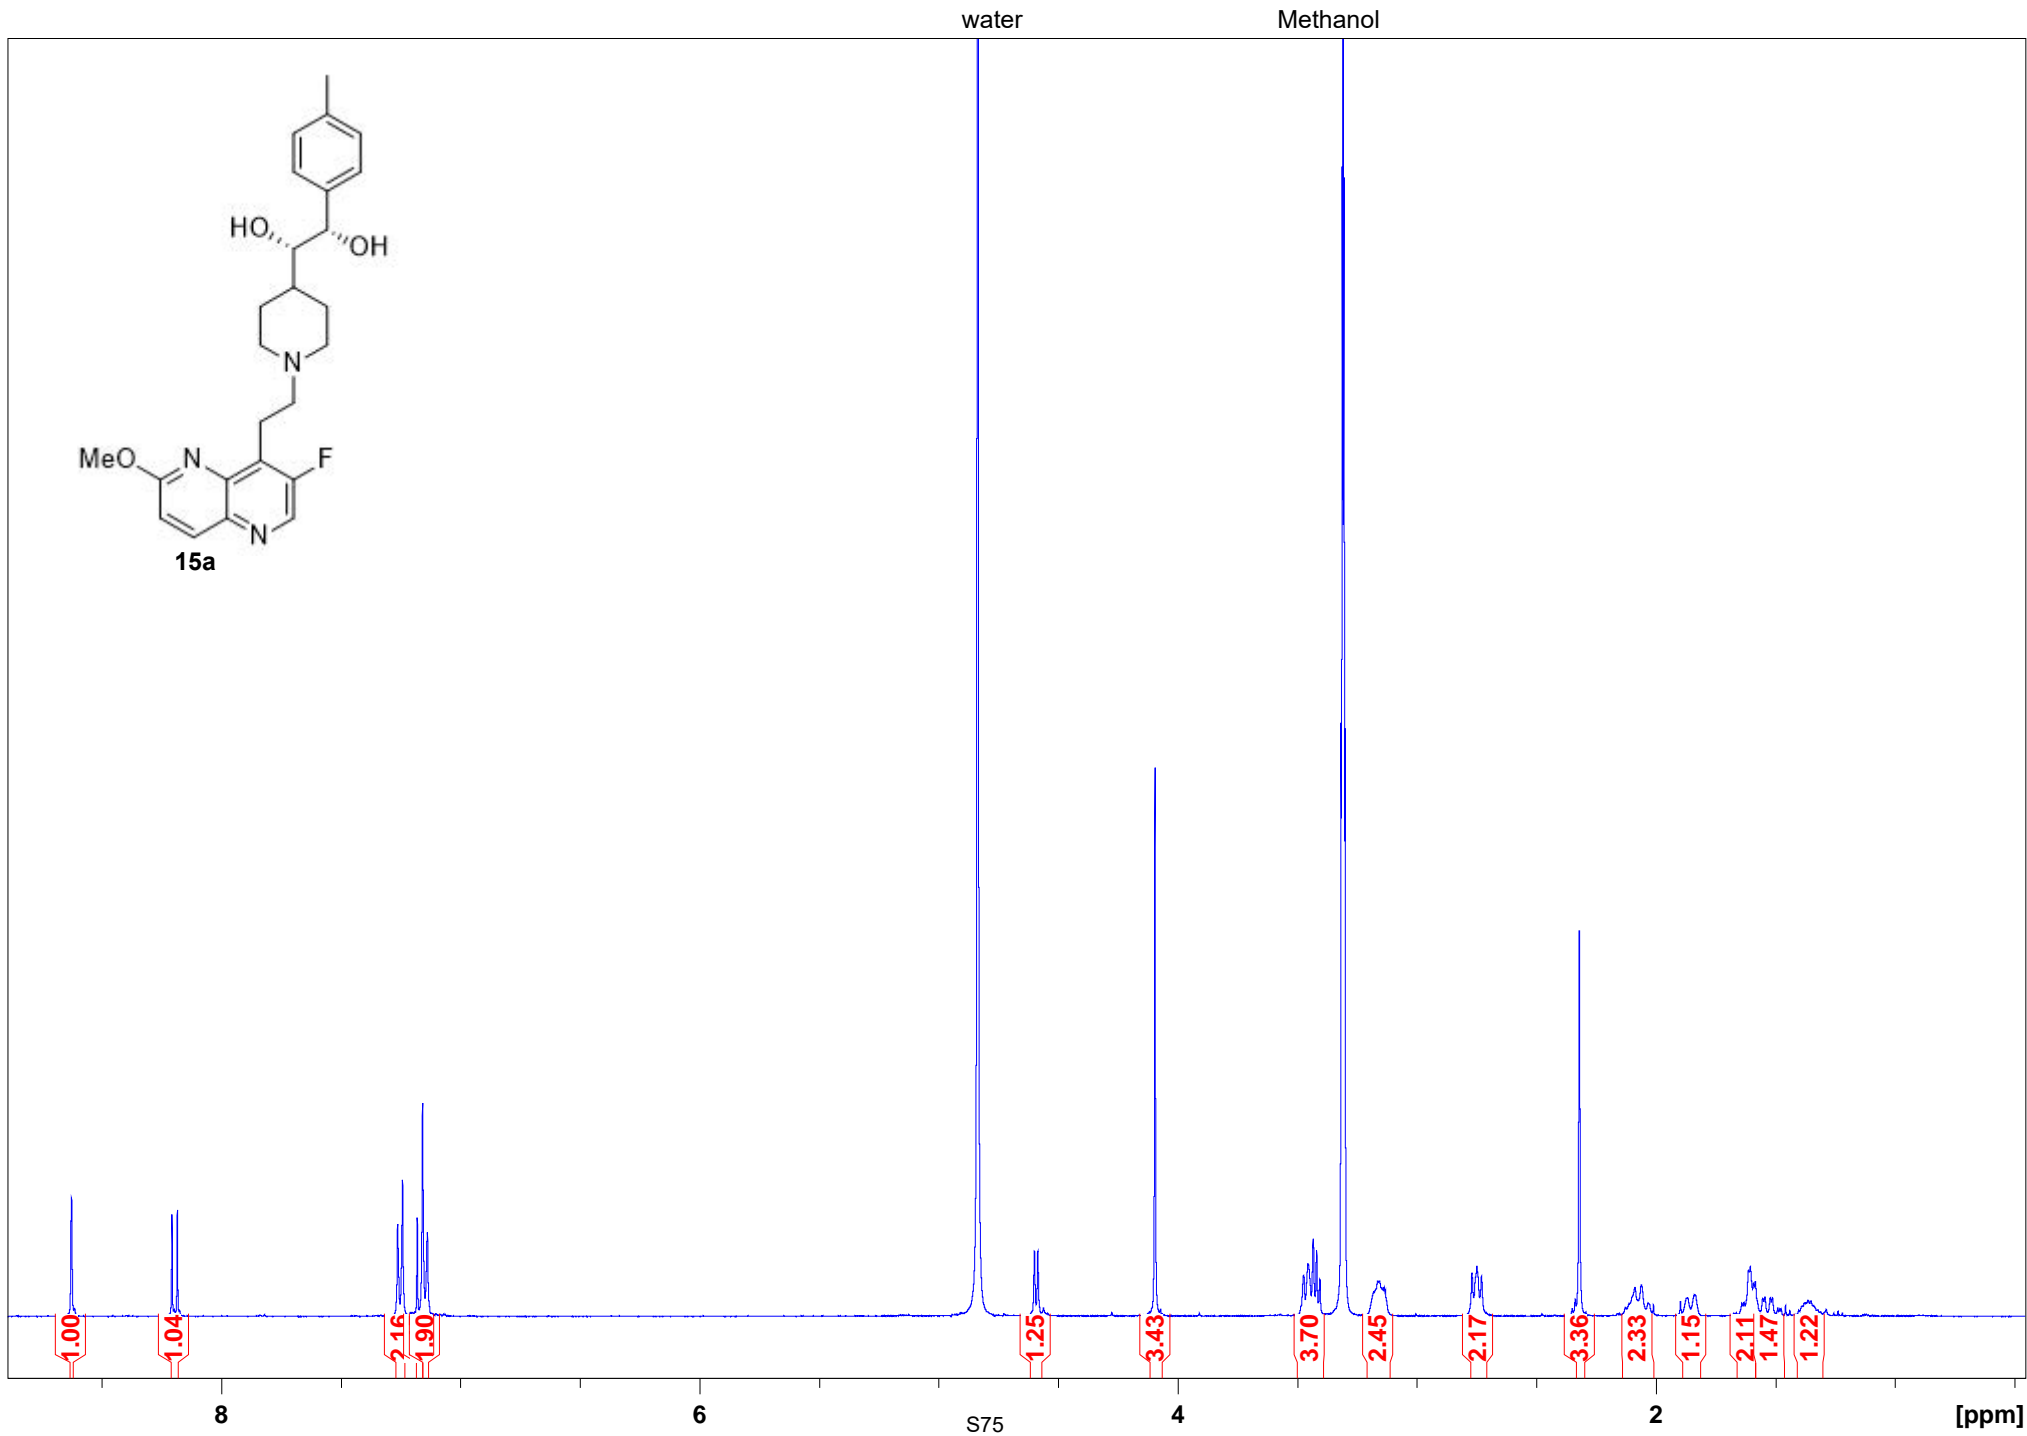

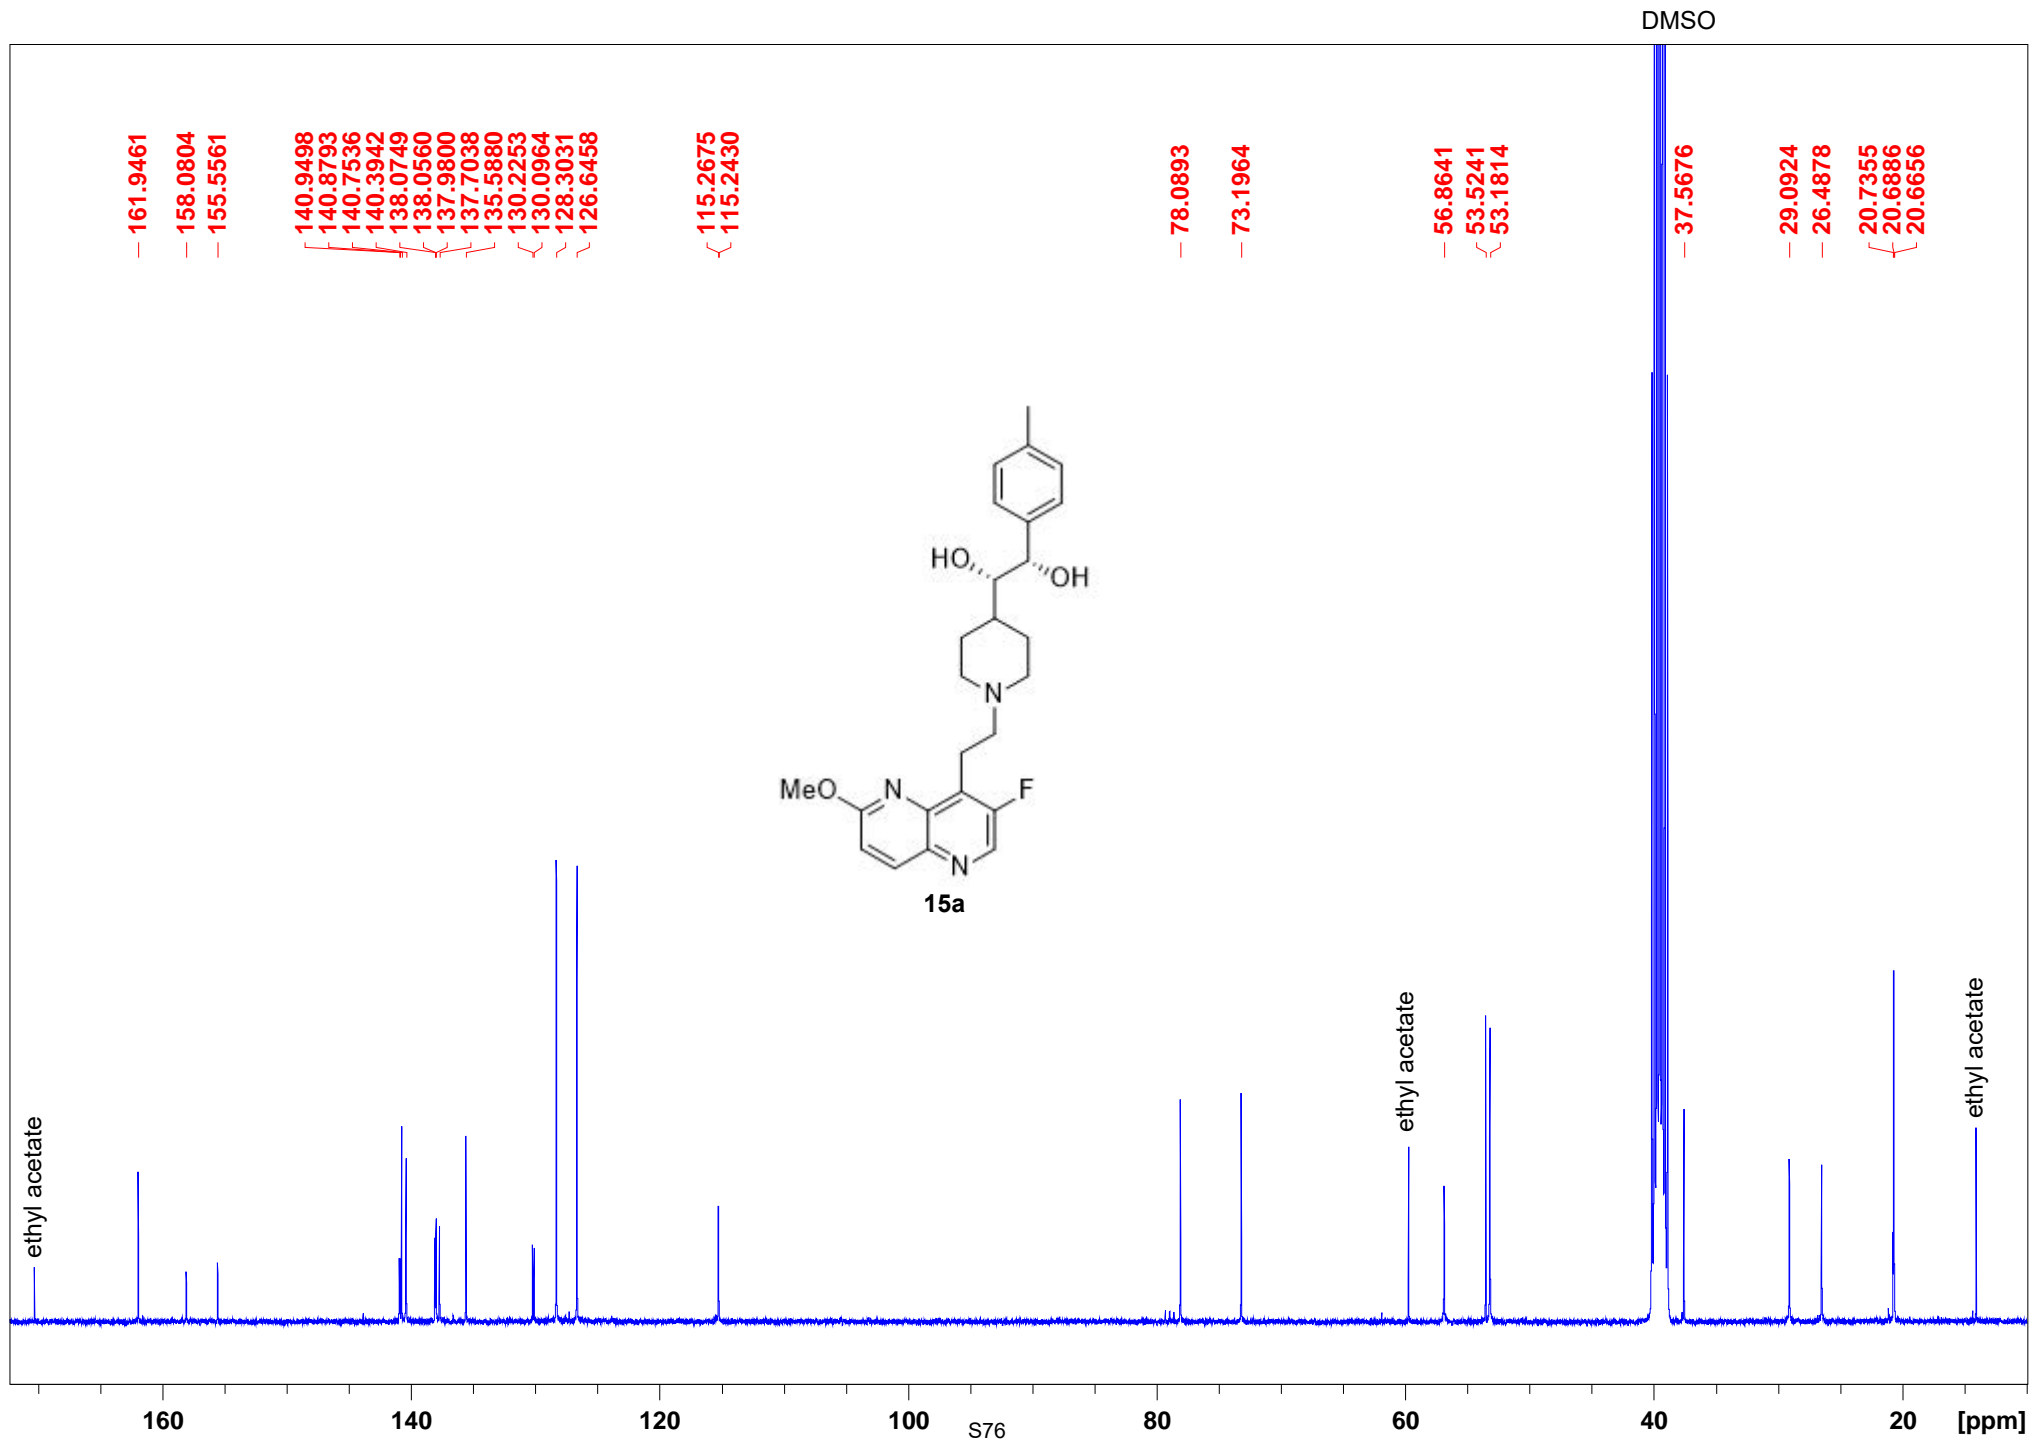

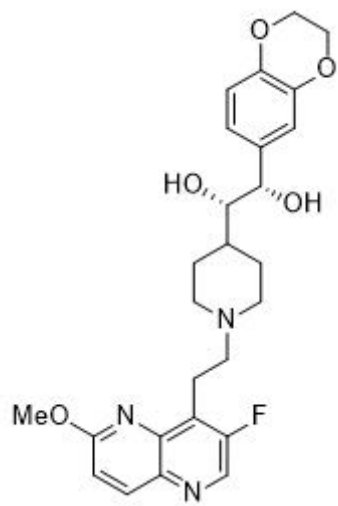

15b

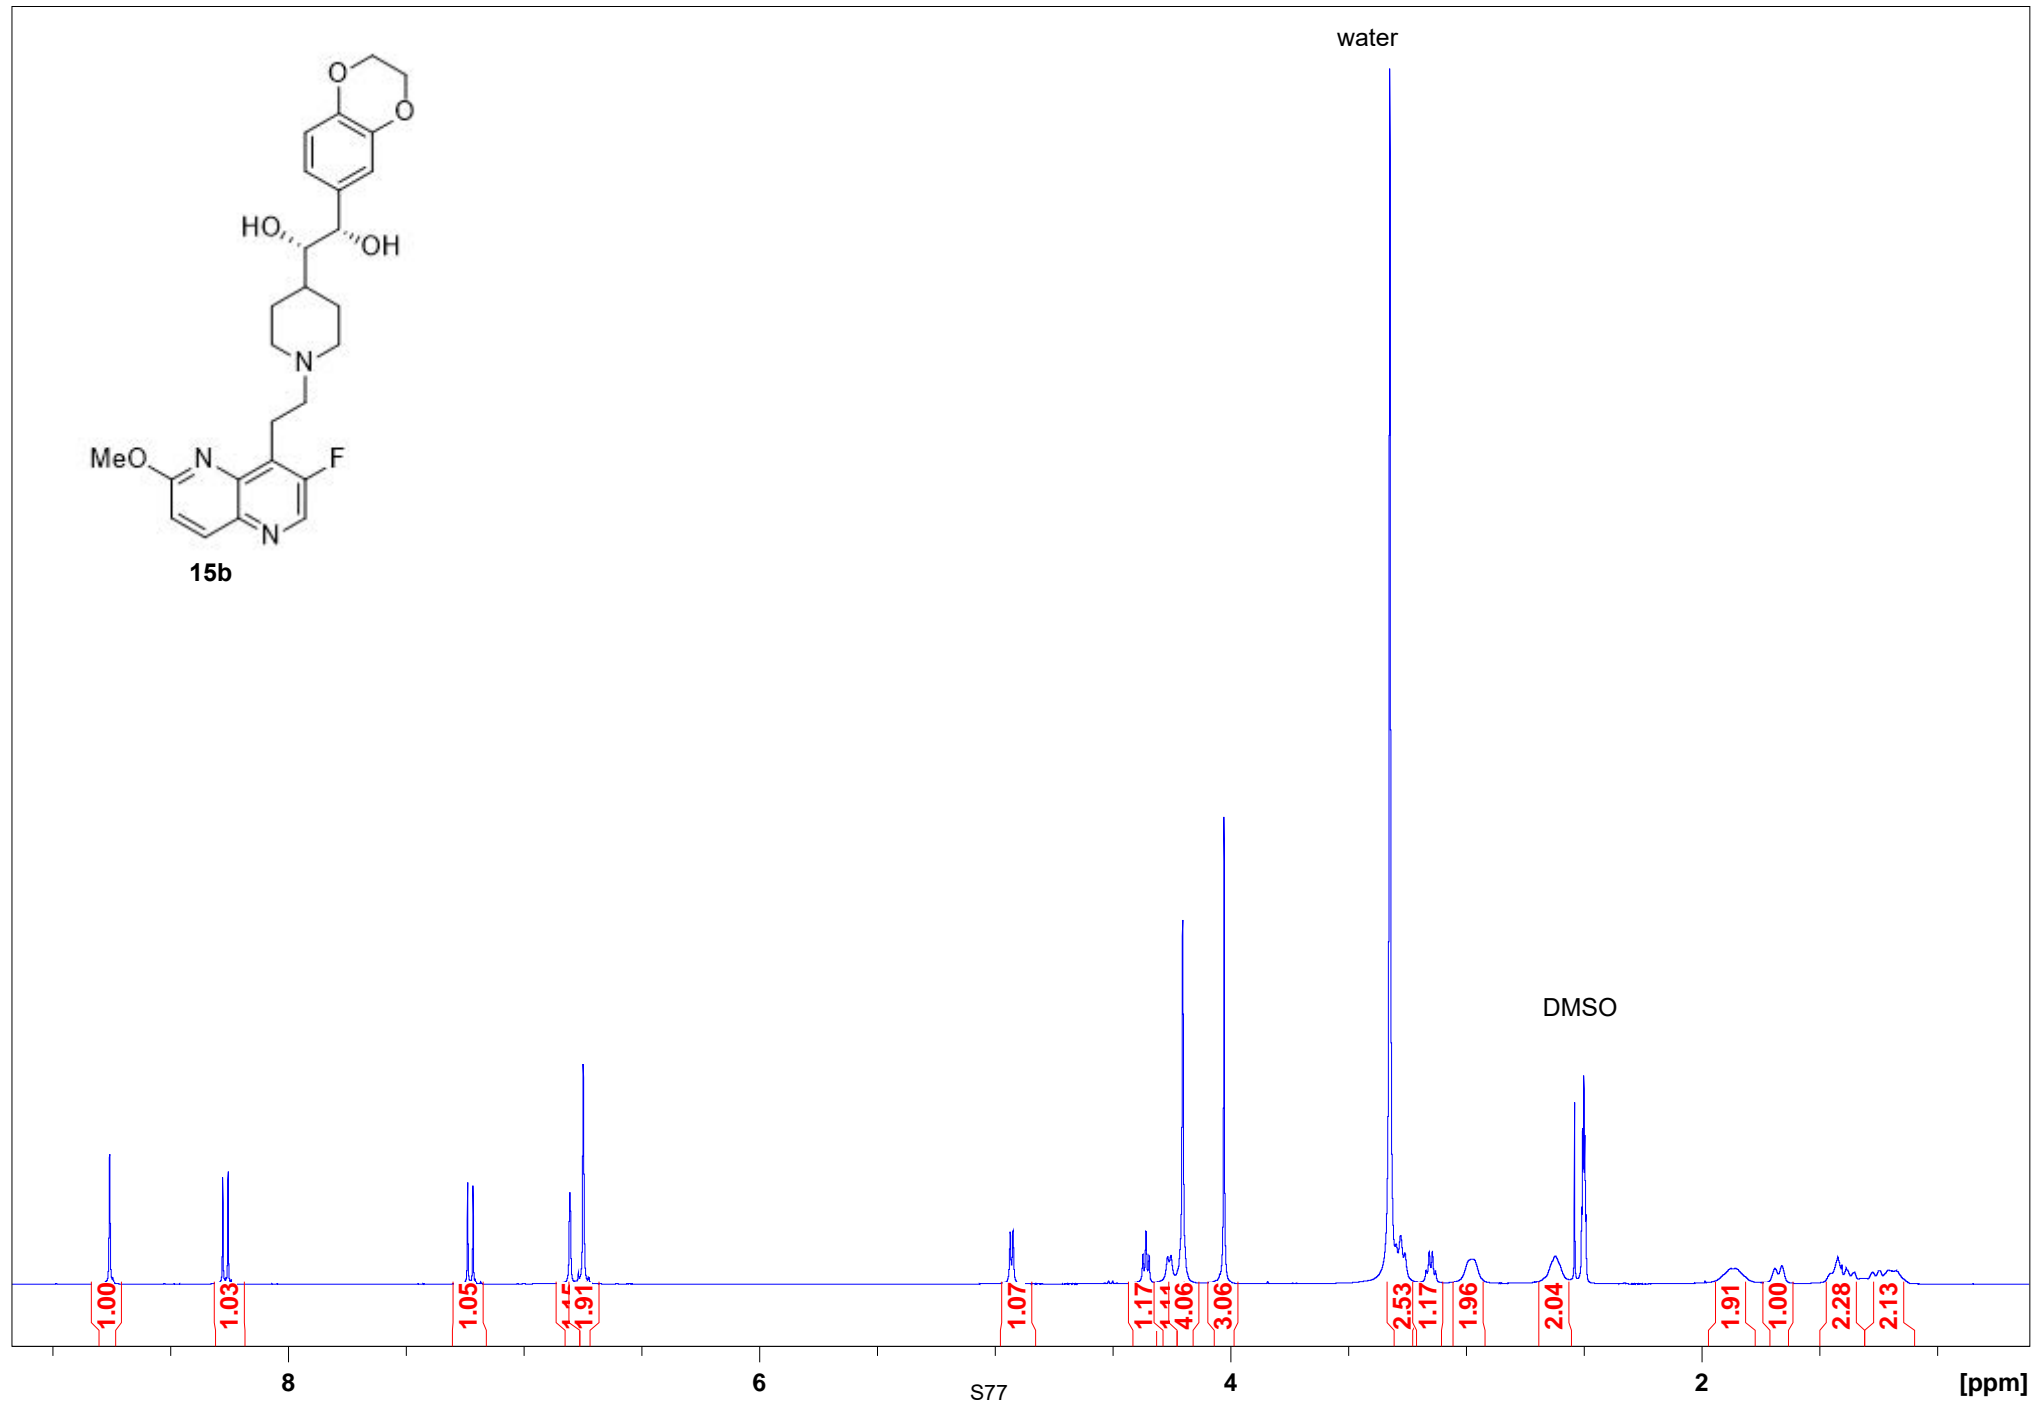

DMSO

161.9846  
158.1030  
155.5774

142.7672  
142.0843  
140.9648  
140.8942  
140.4254  
M 138.1035  
138.0817  
138.0195  
137.7442  
136.9753

119.4816  
116.2036  
115.4069  
115.3104  
M 115.2892

77.9795

72.7663

64.0187  
63.9825

56.8353  
53.5680  
53.1635

48.5902

37.5541

29.0012  
26.5448

20.6538

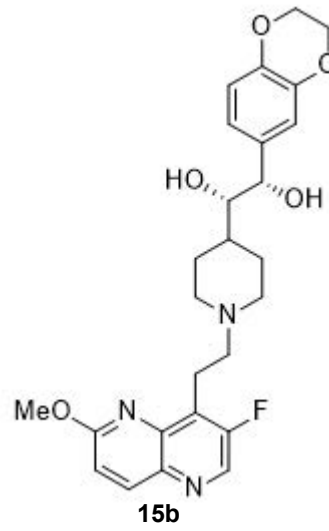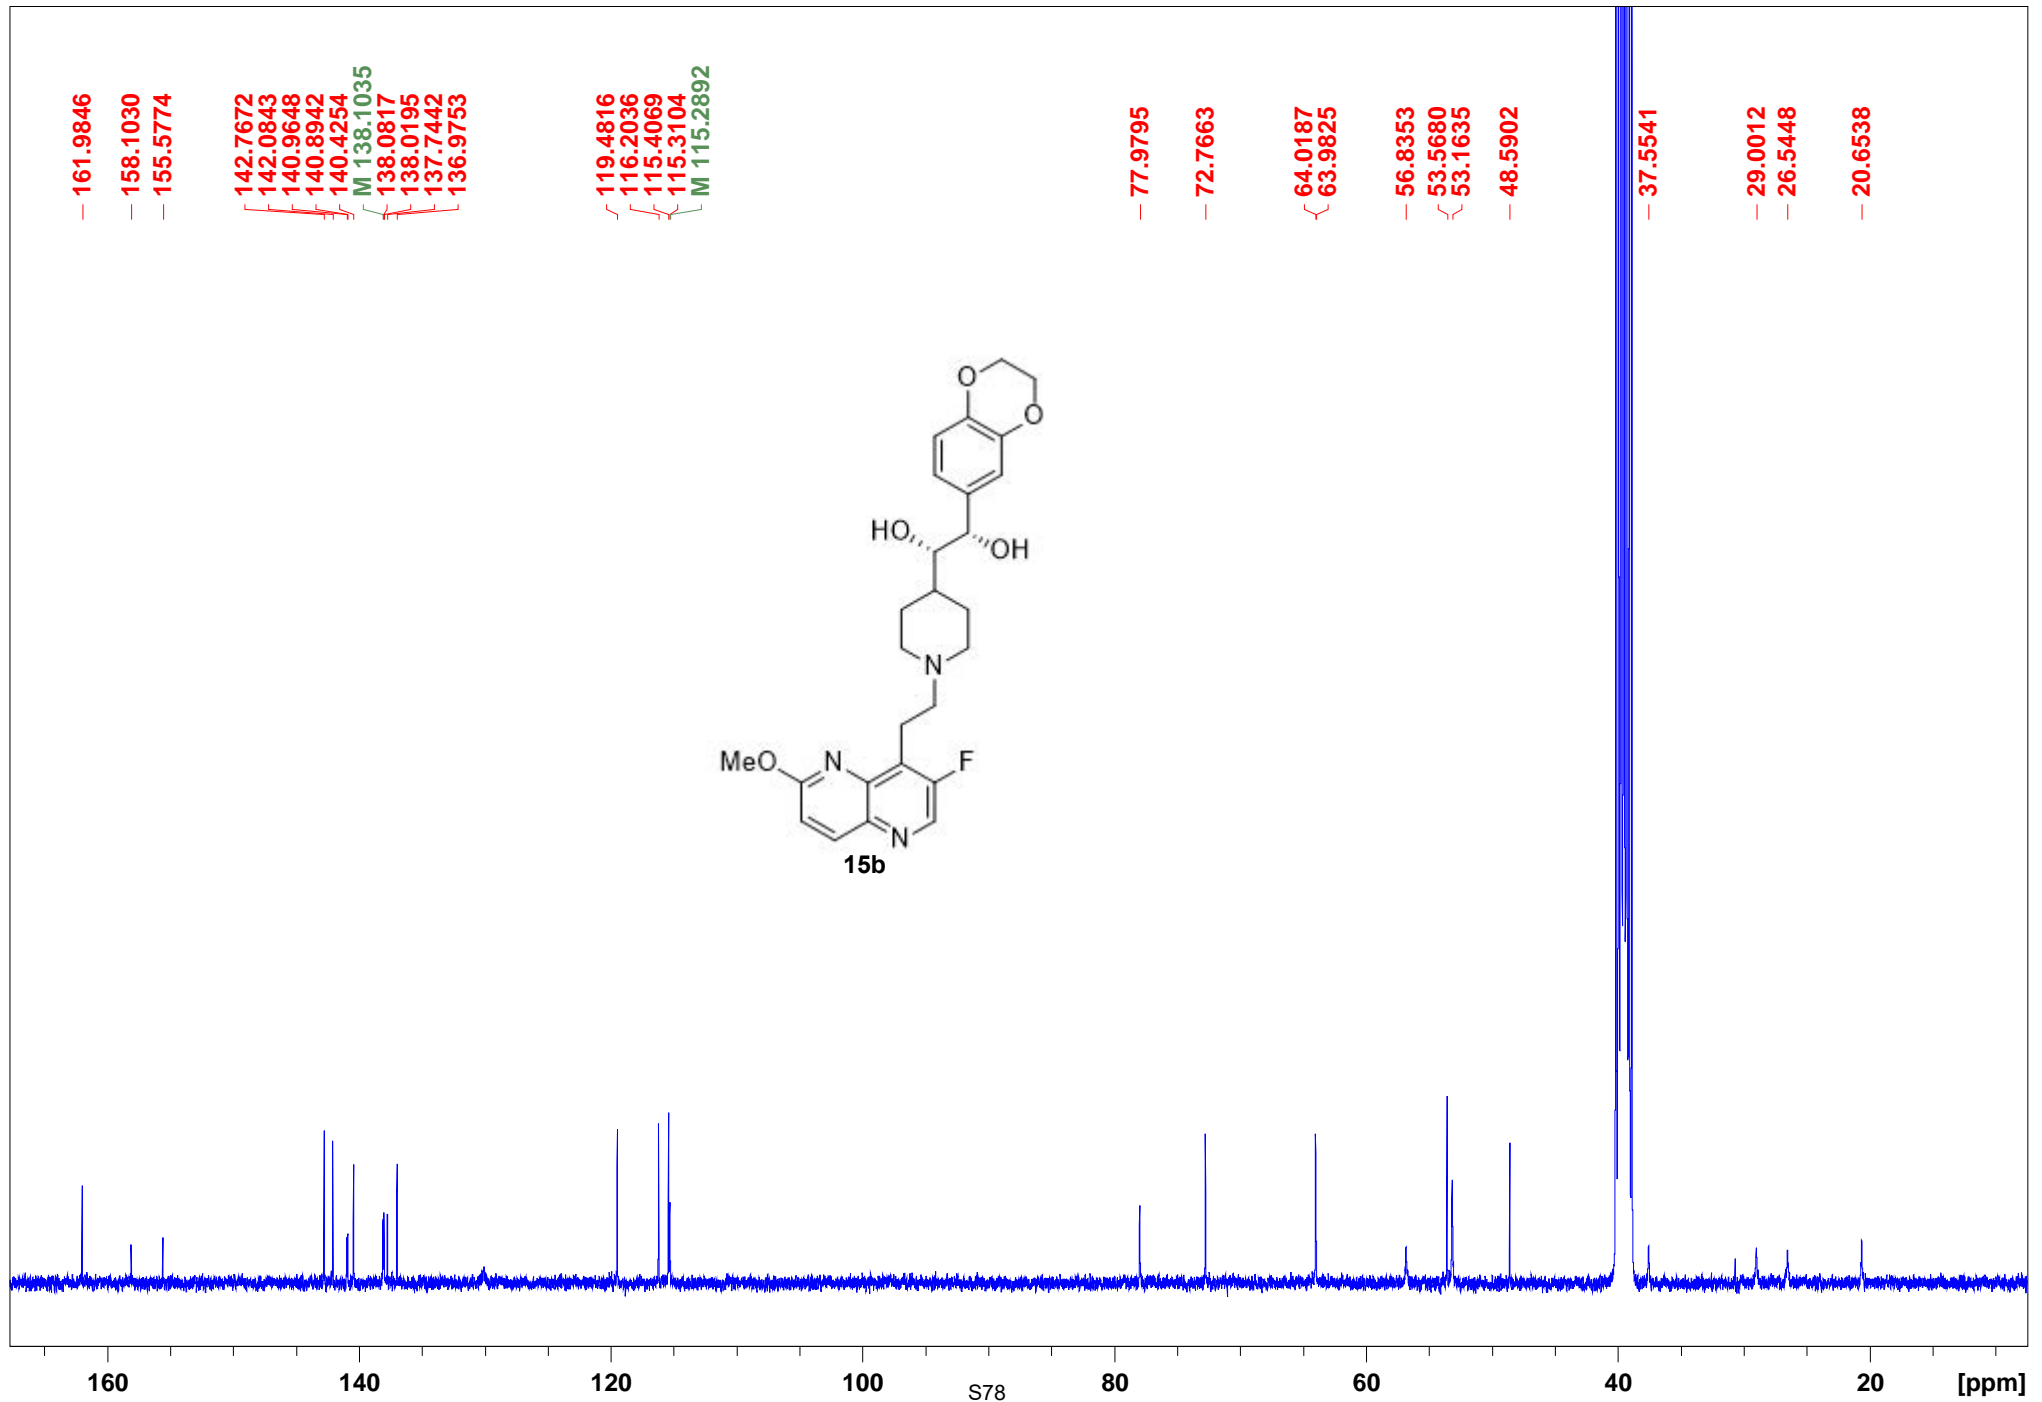

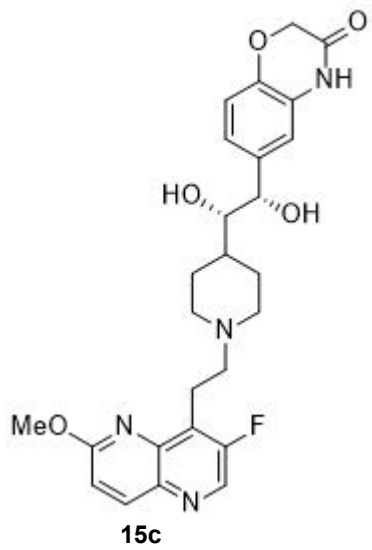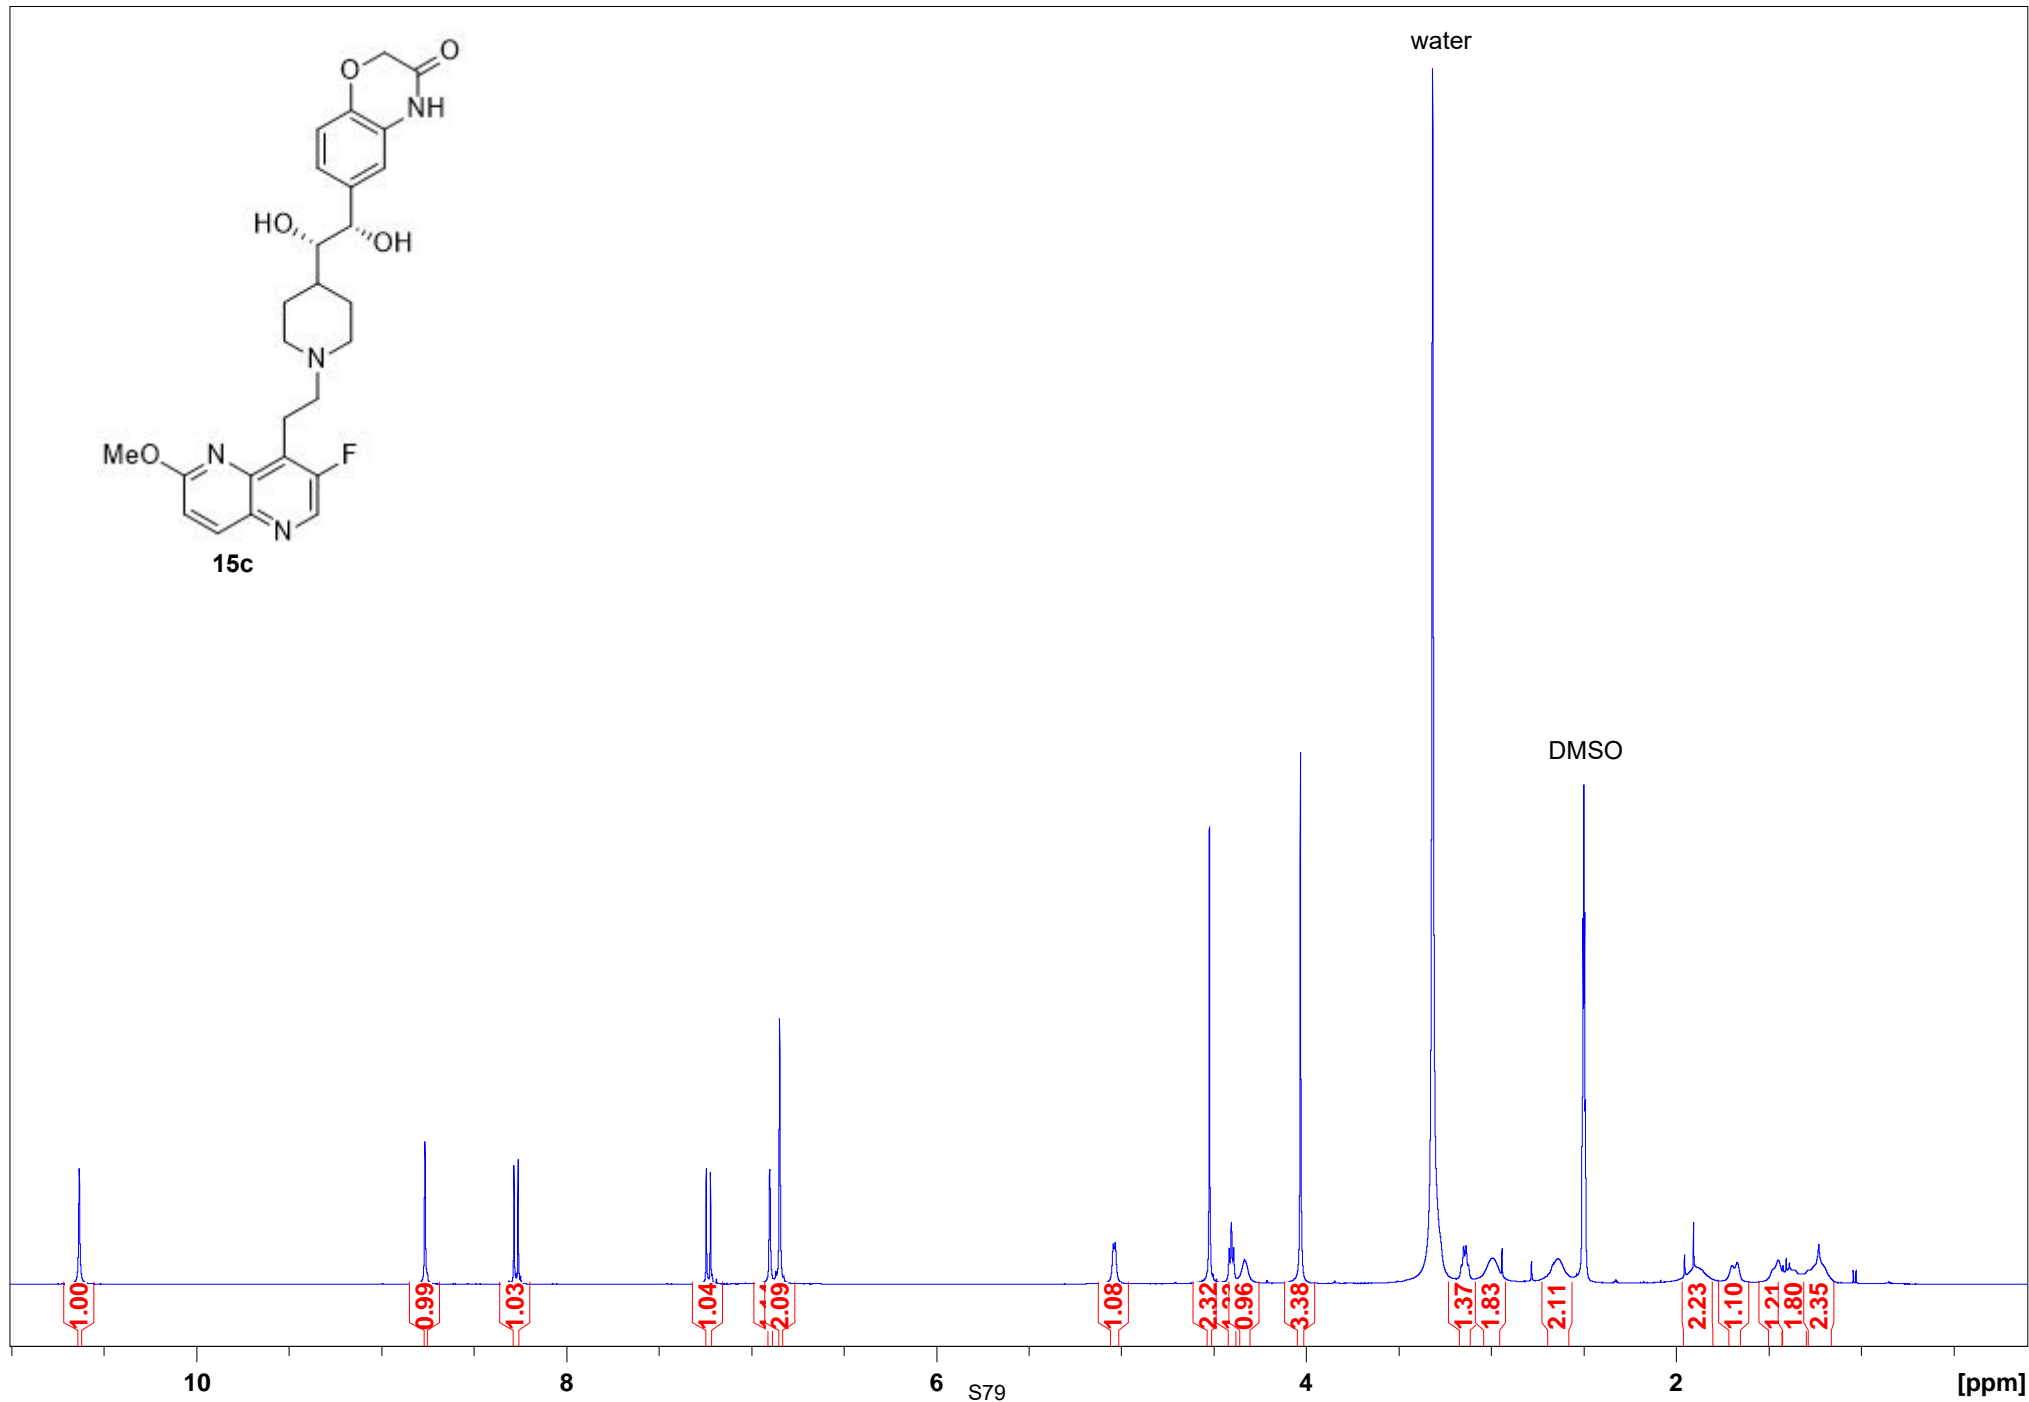

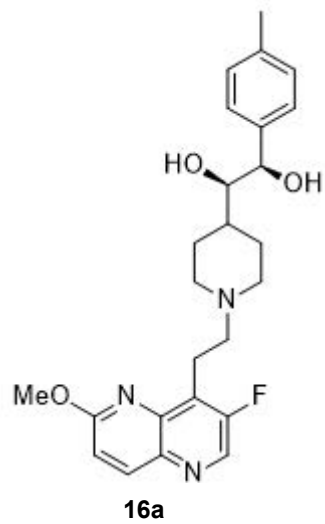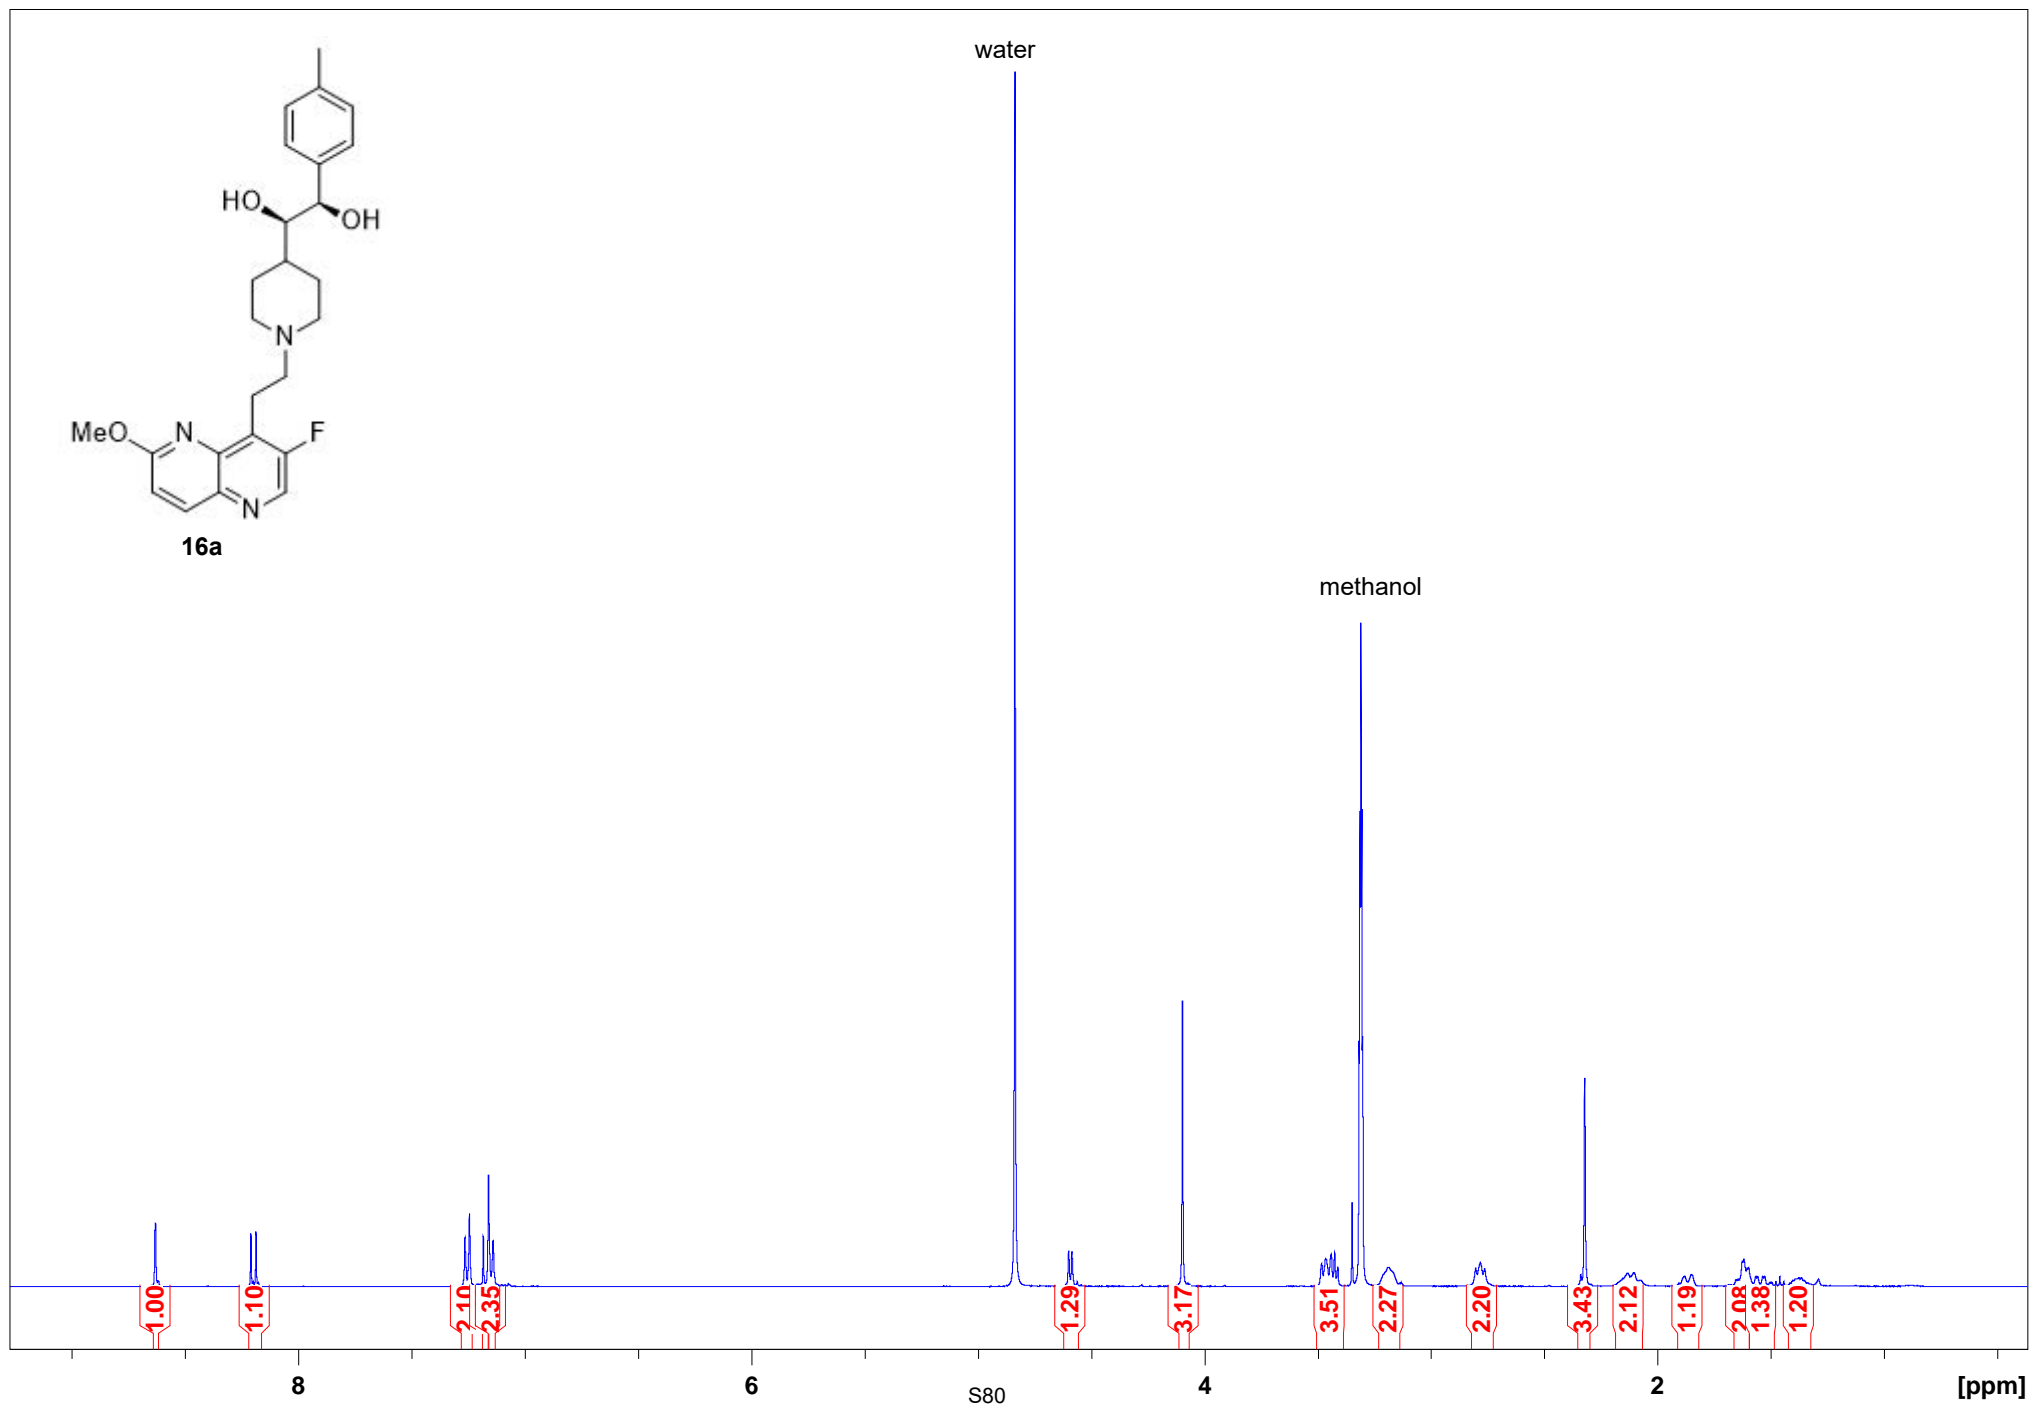



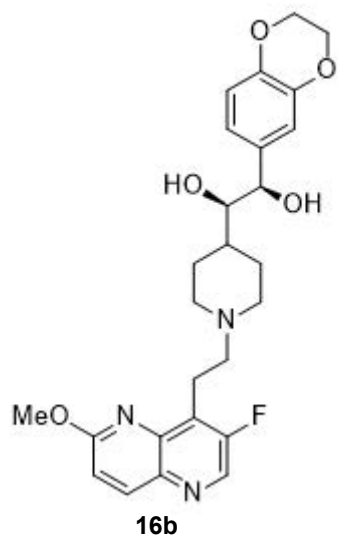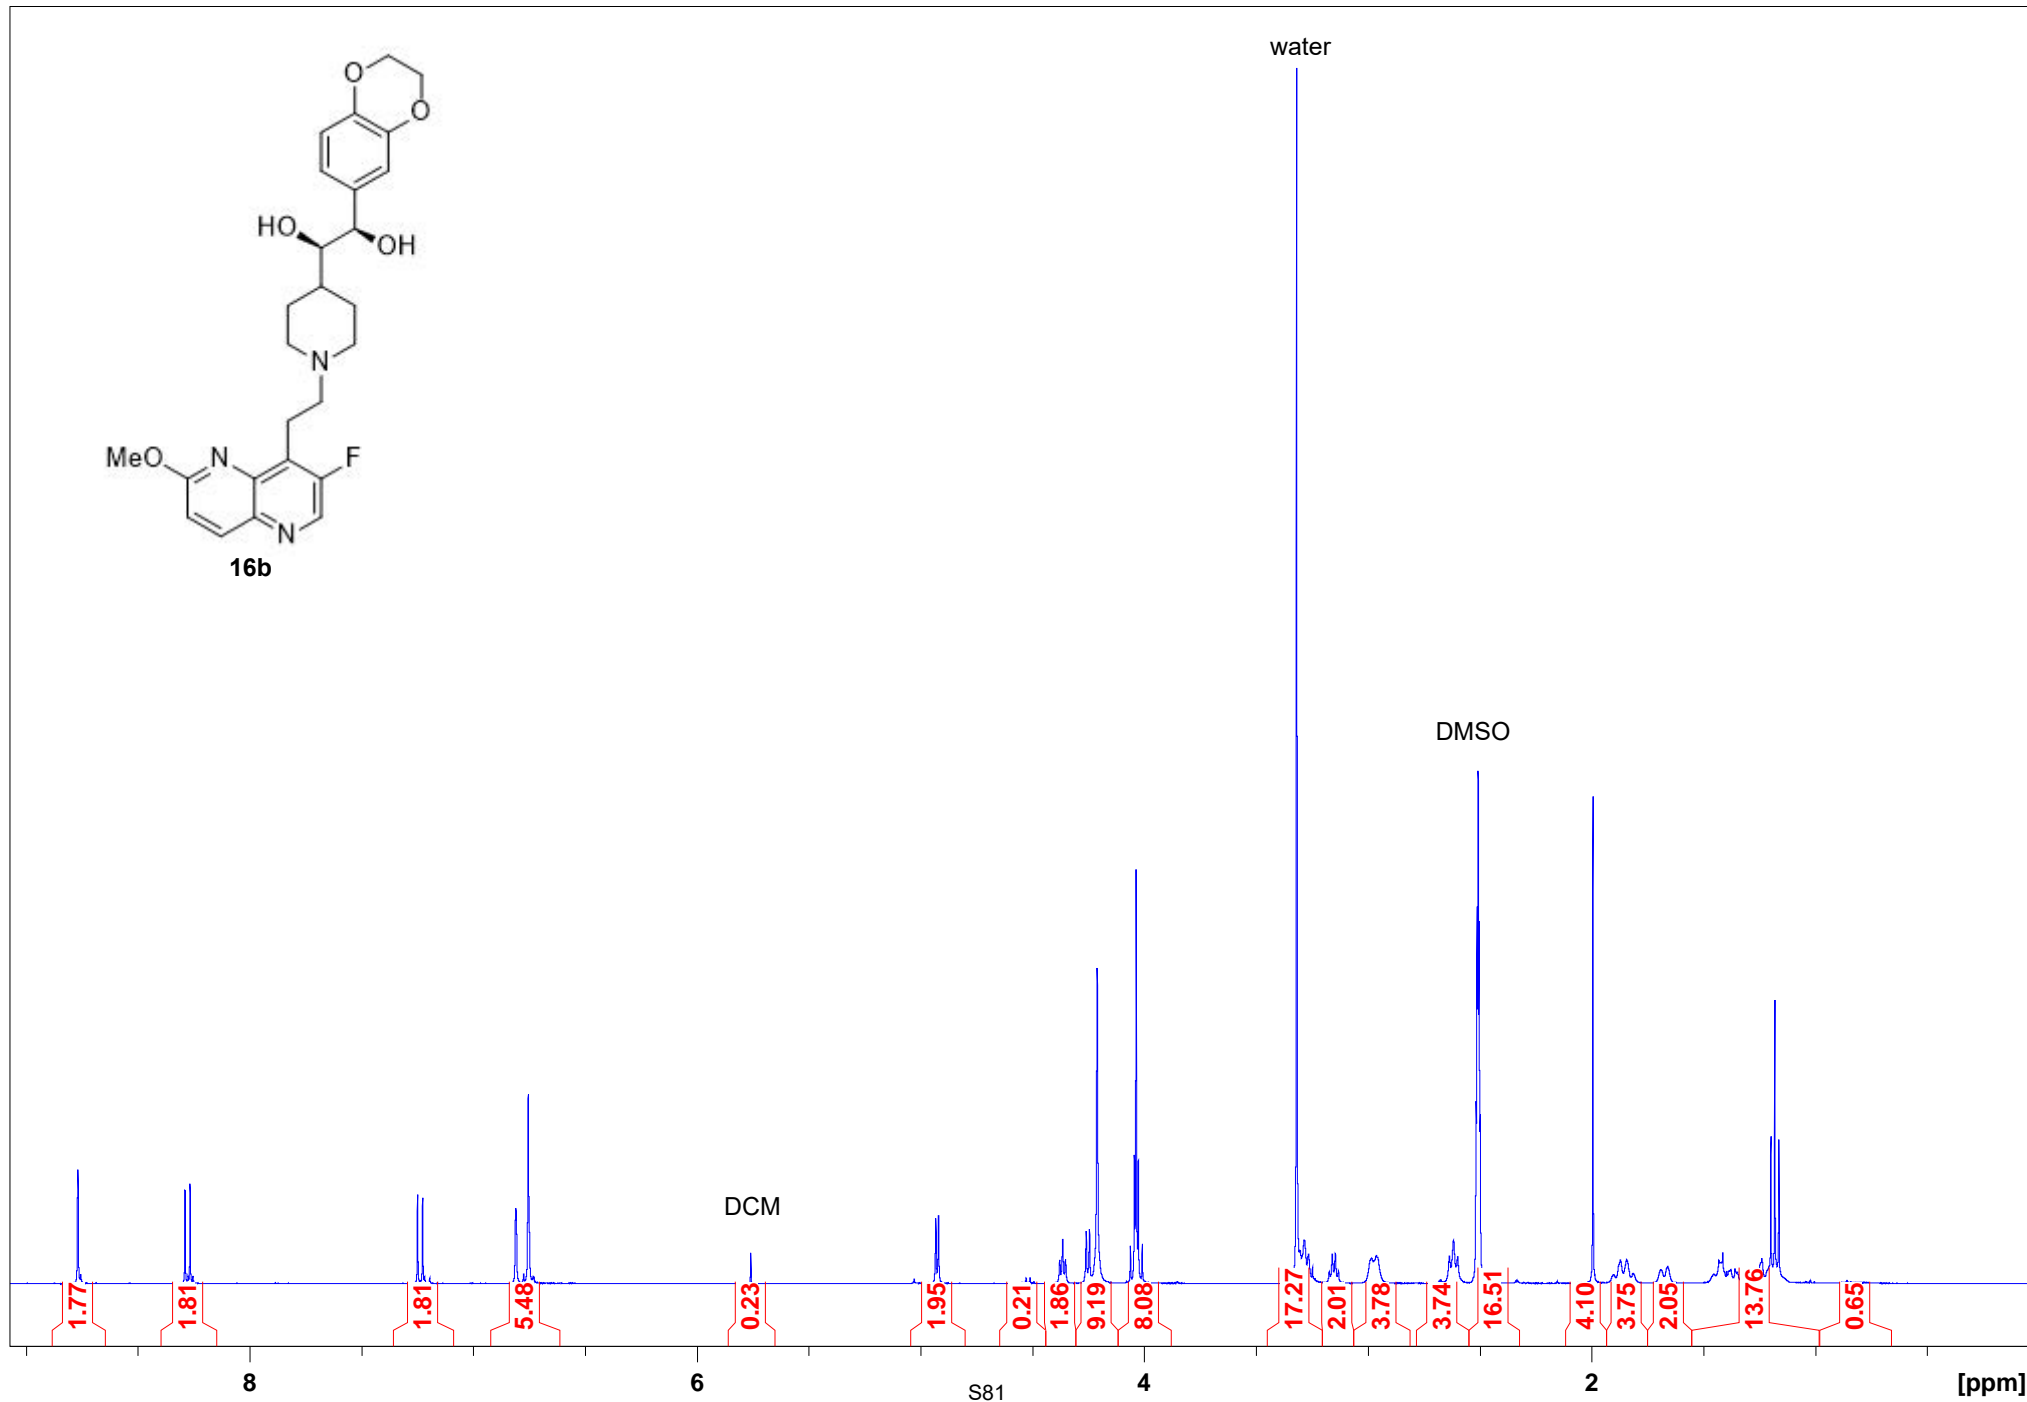

DMSO

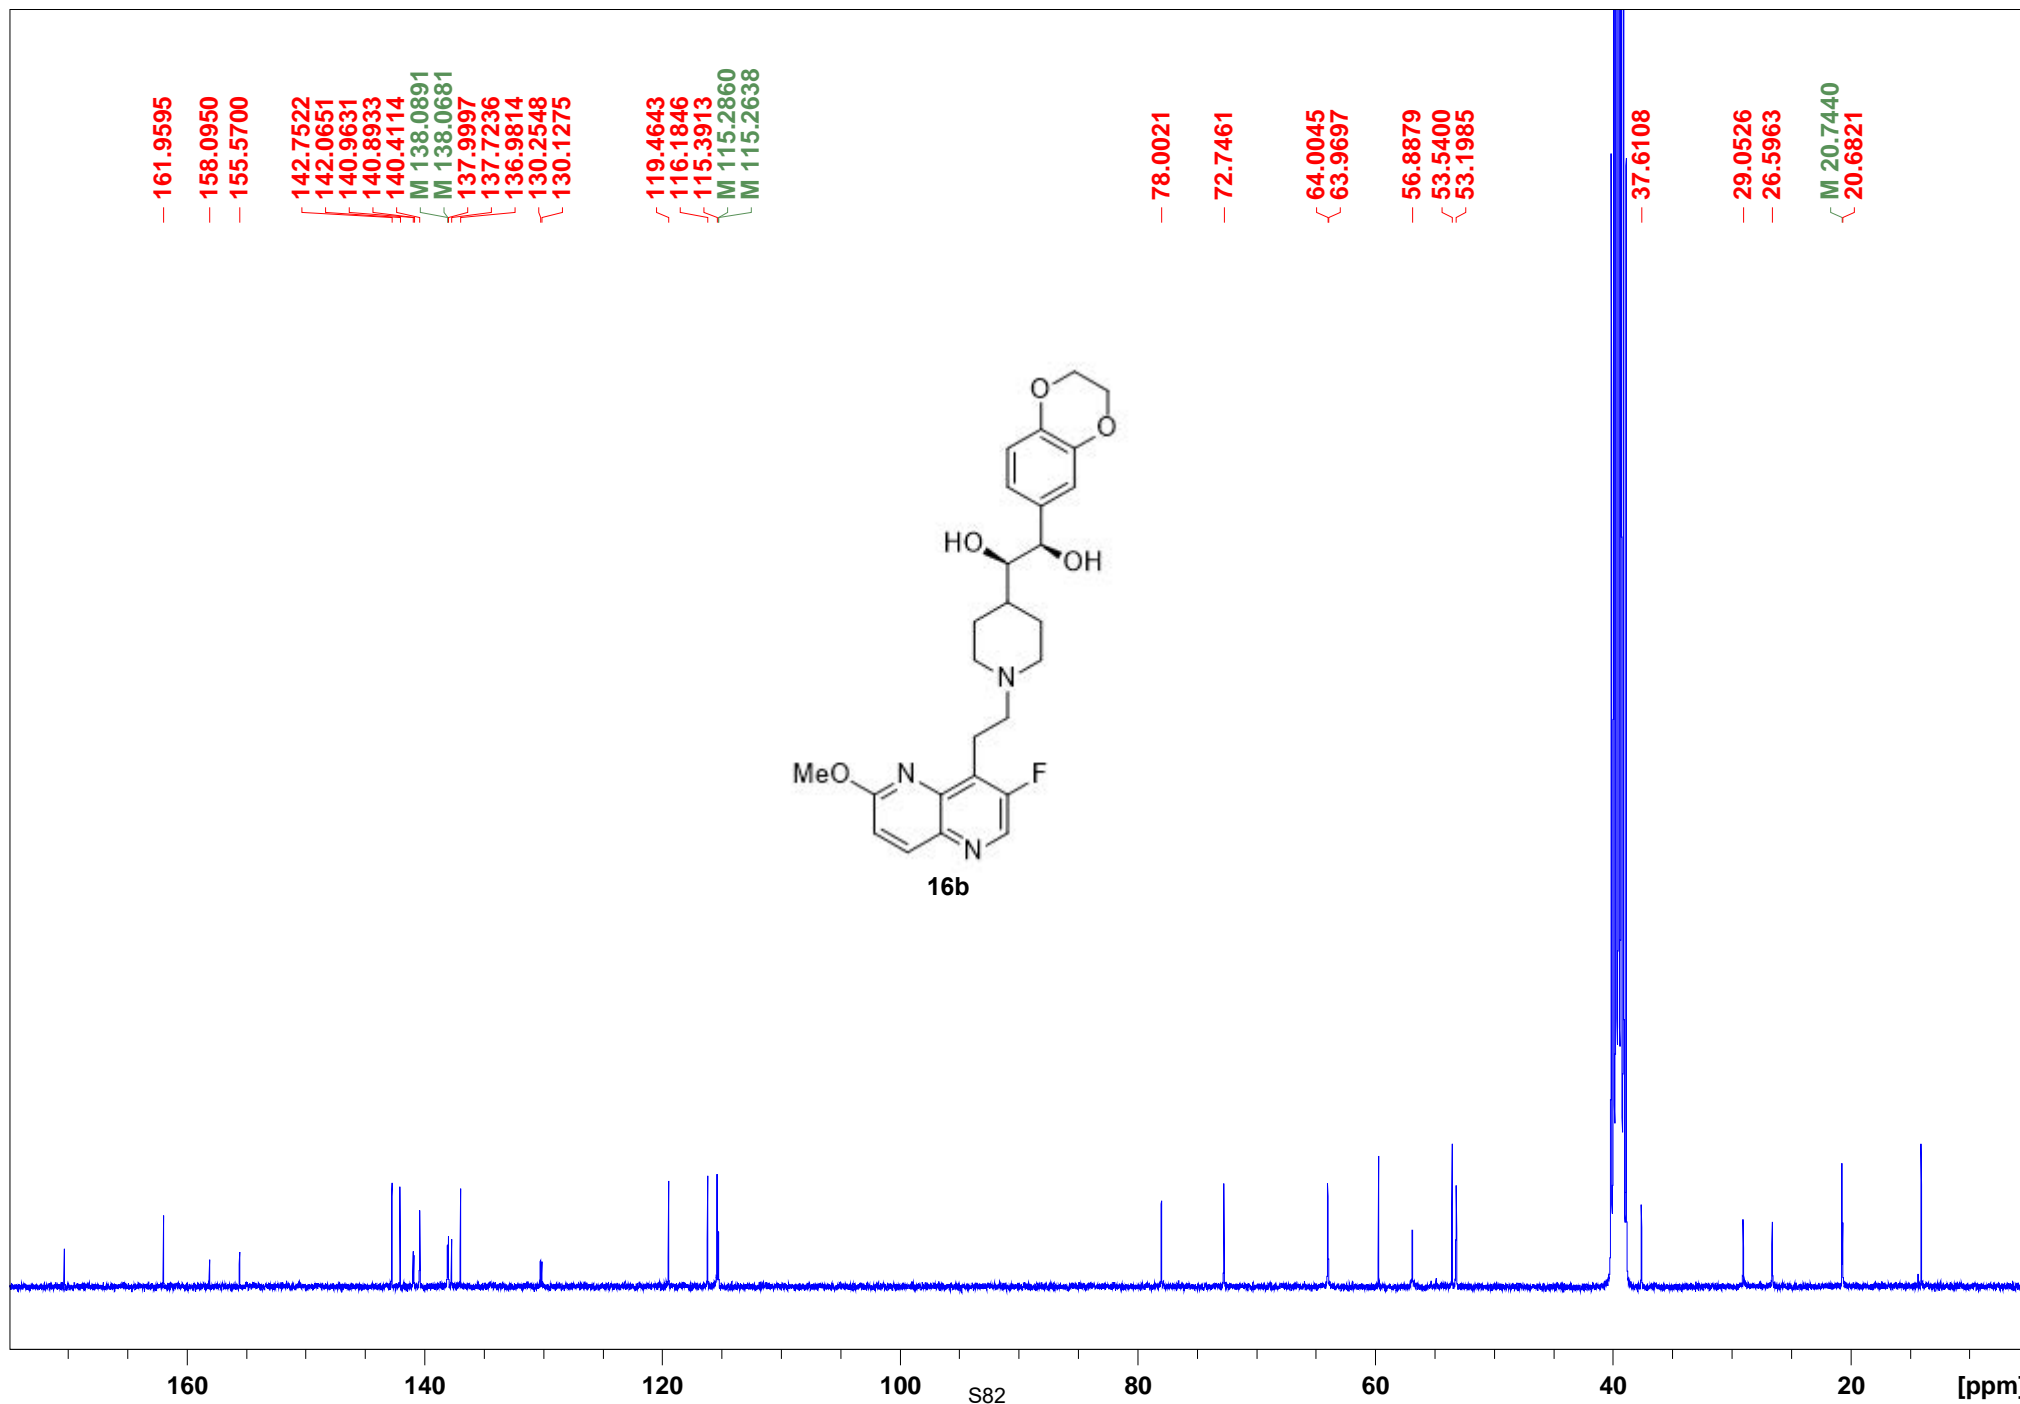

water

DMSO

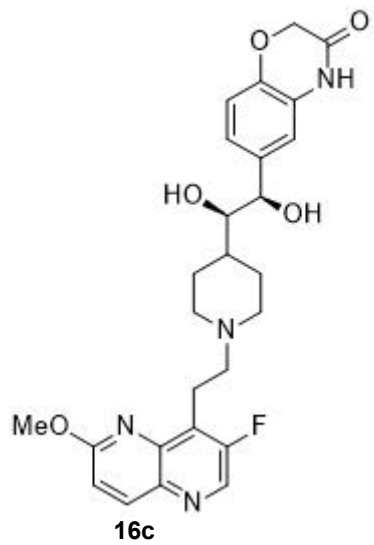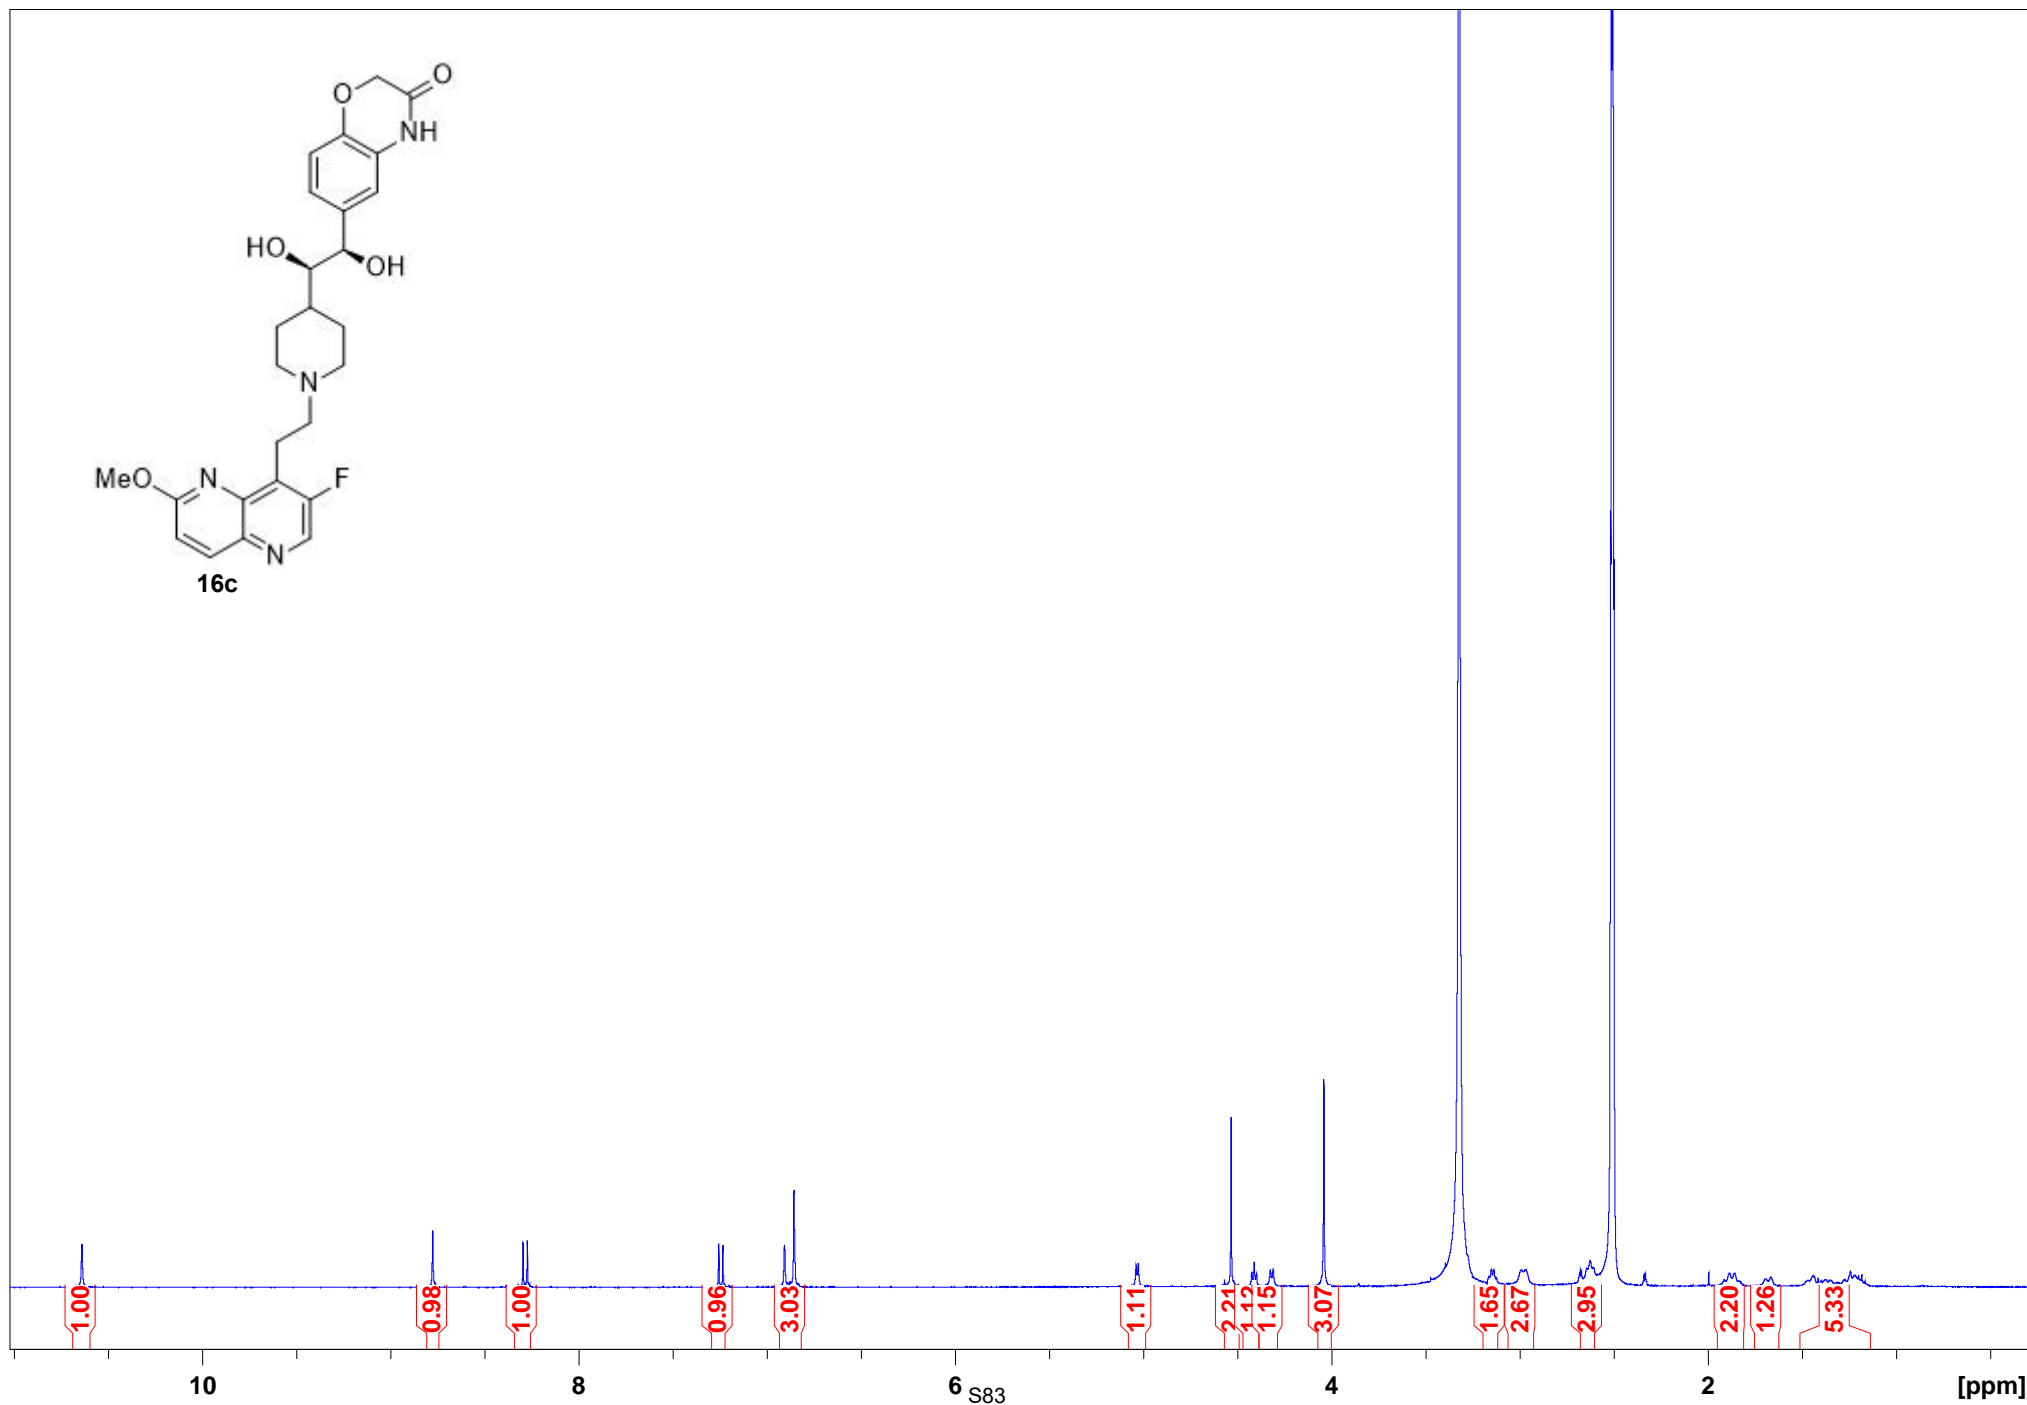

DMSO

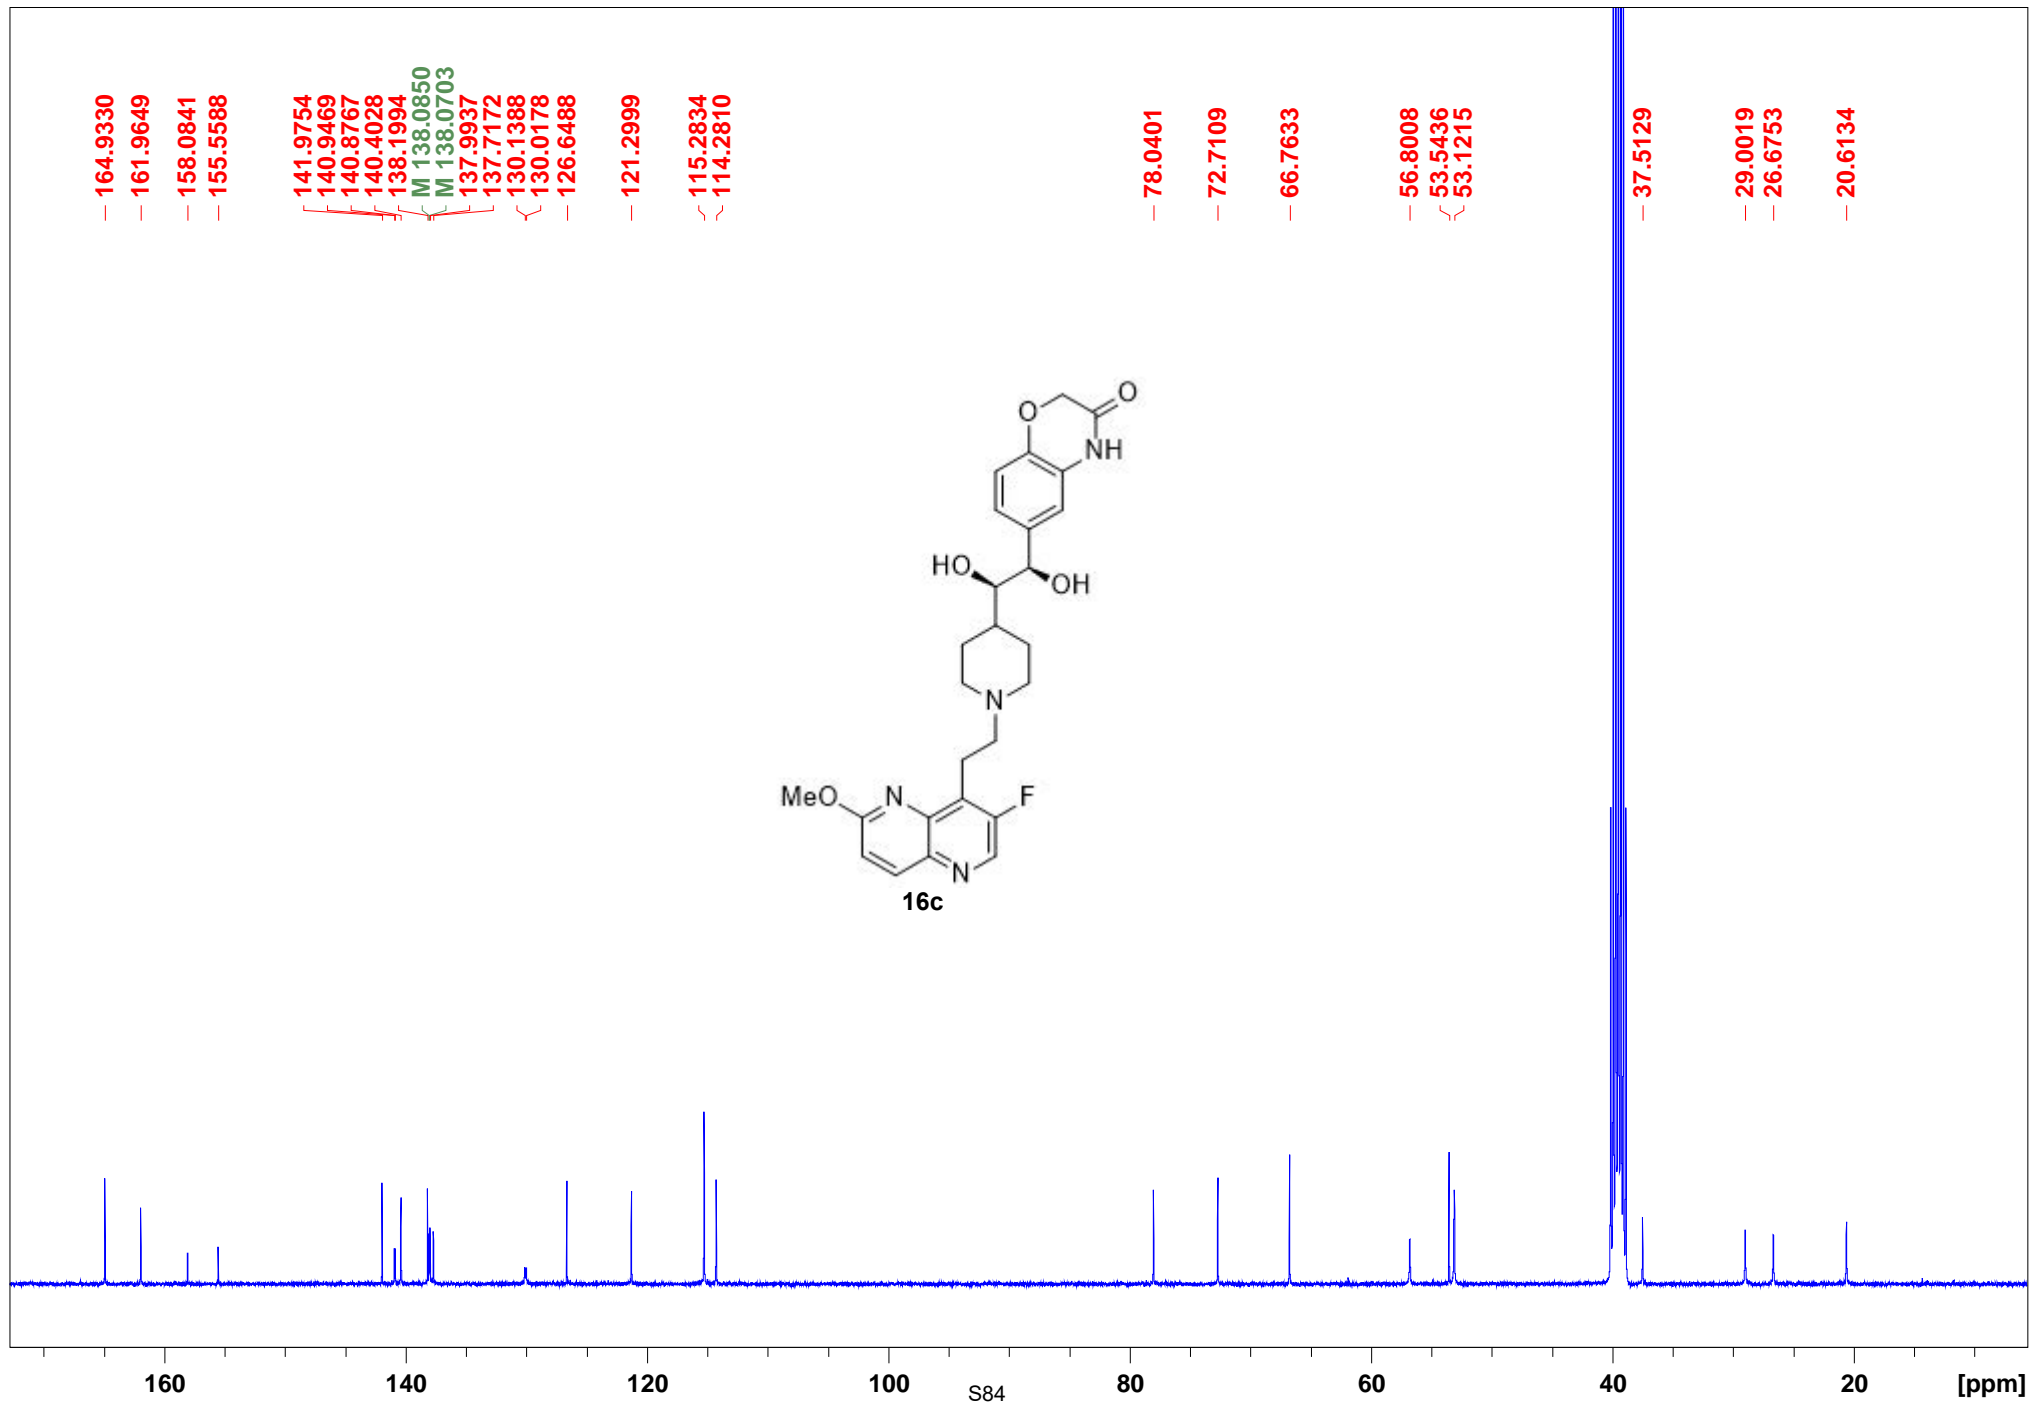

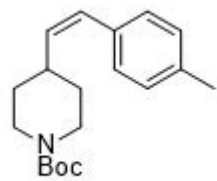

19a

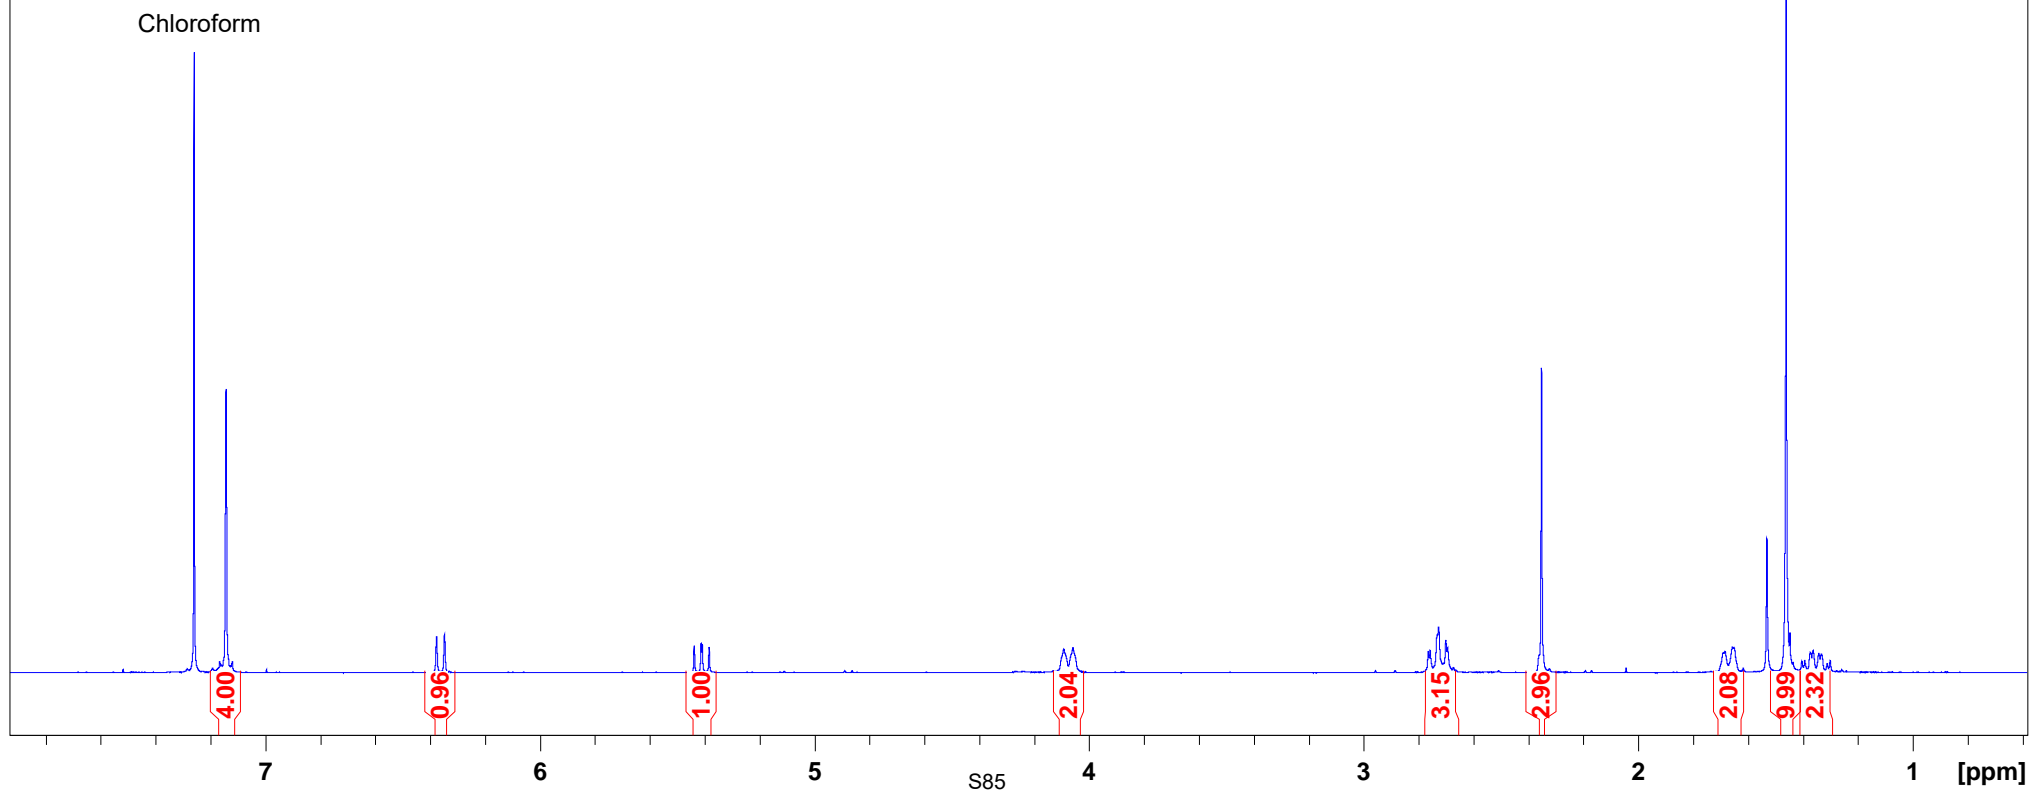

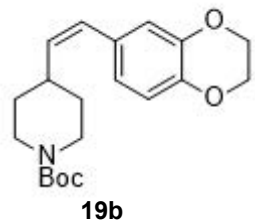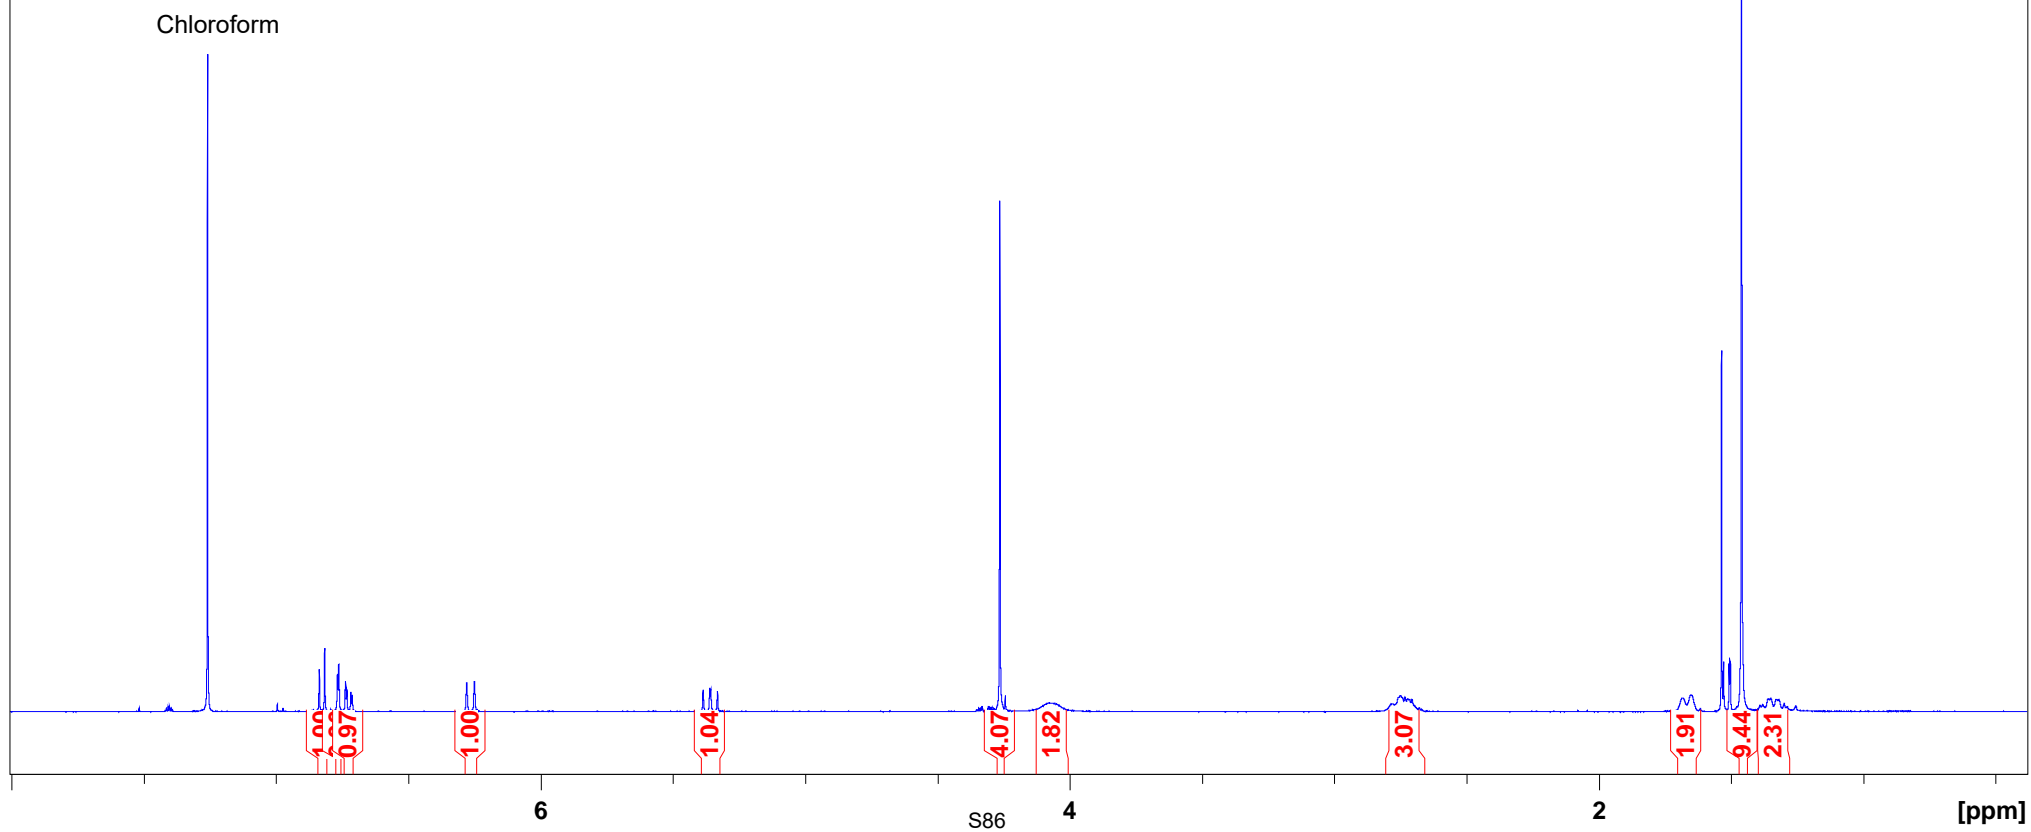

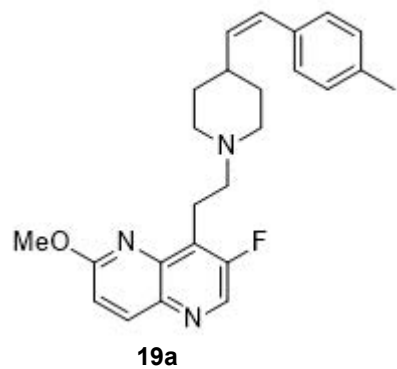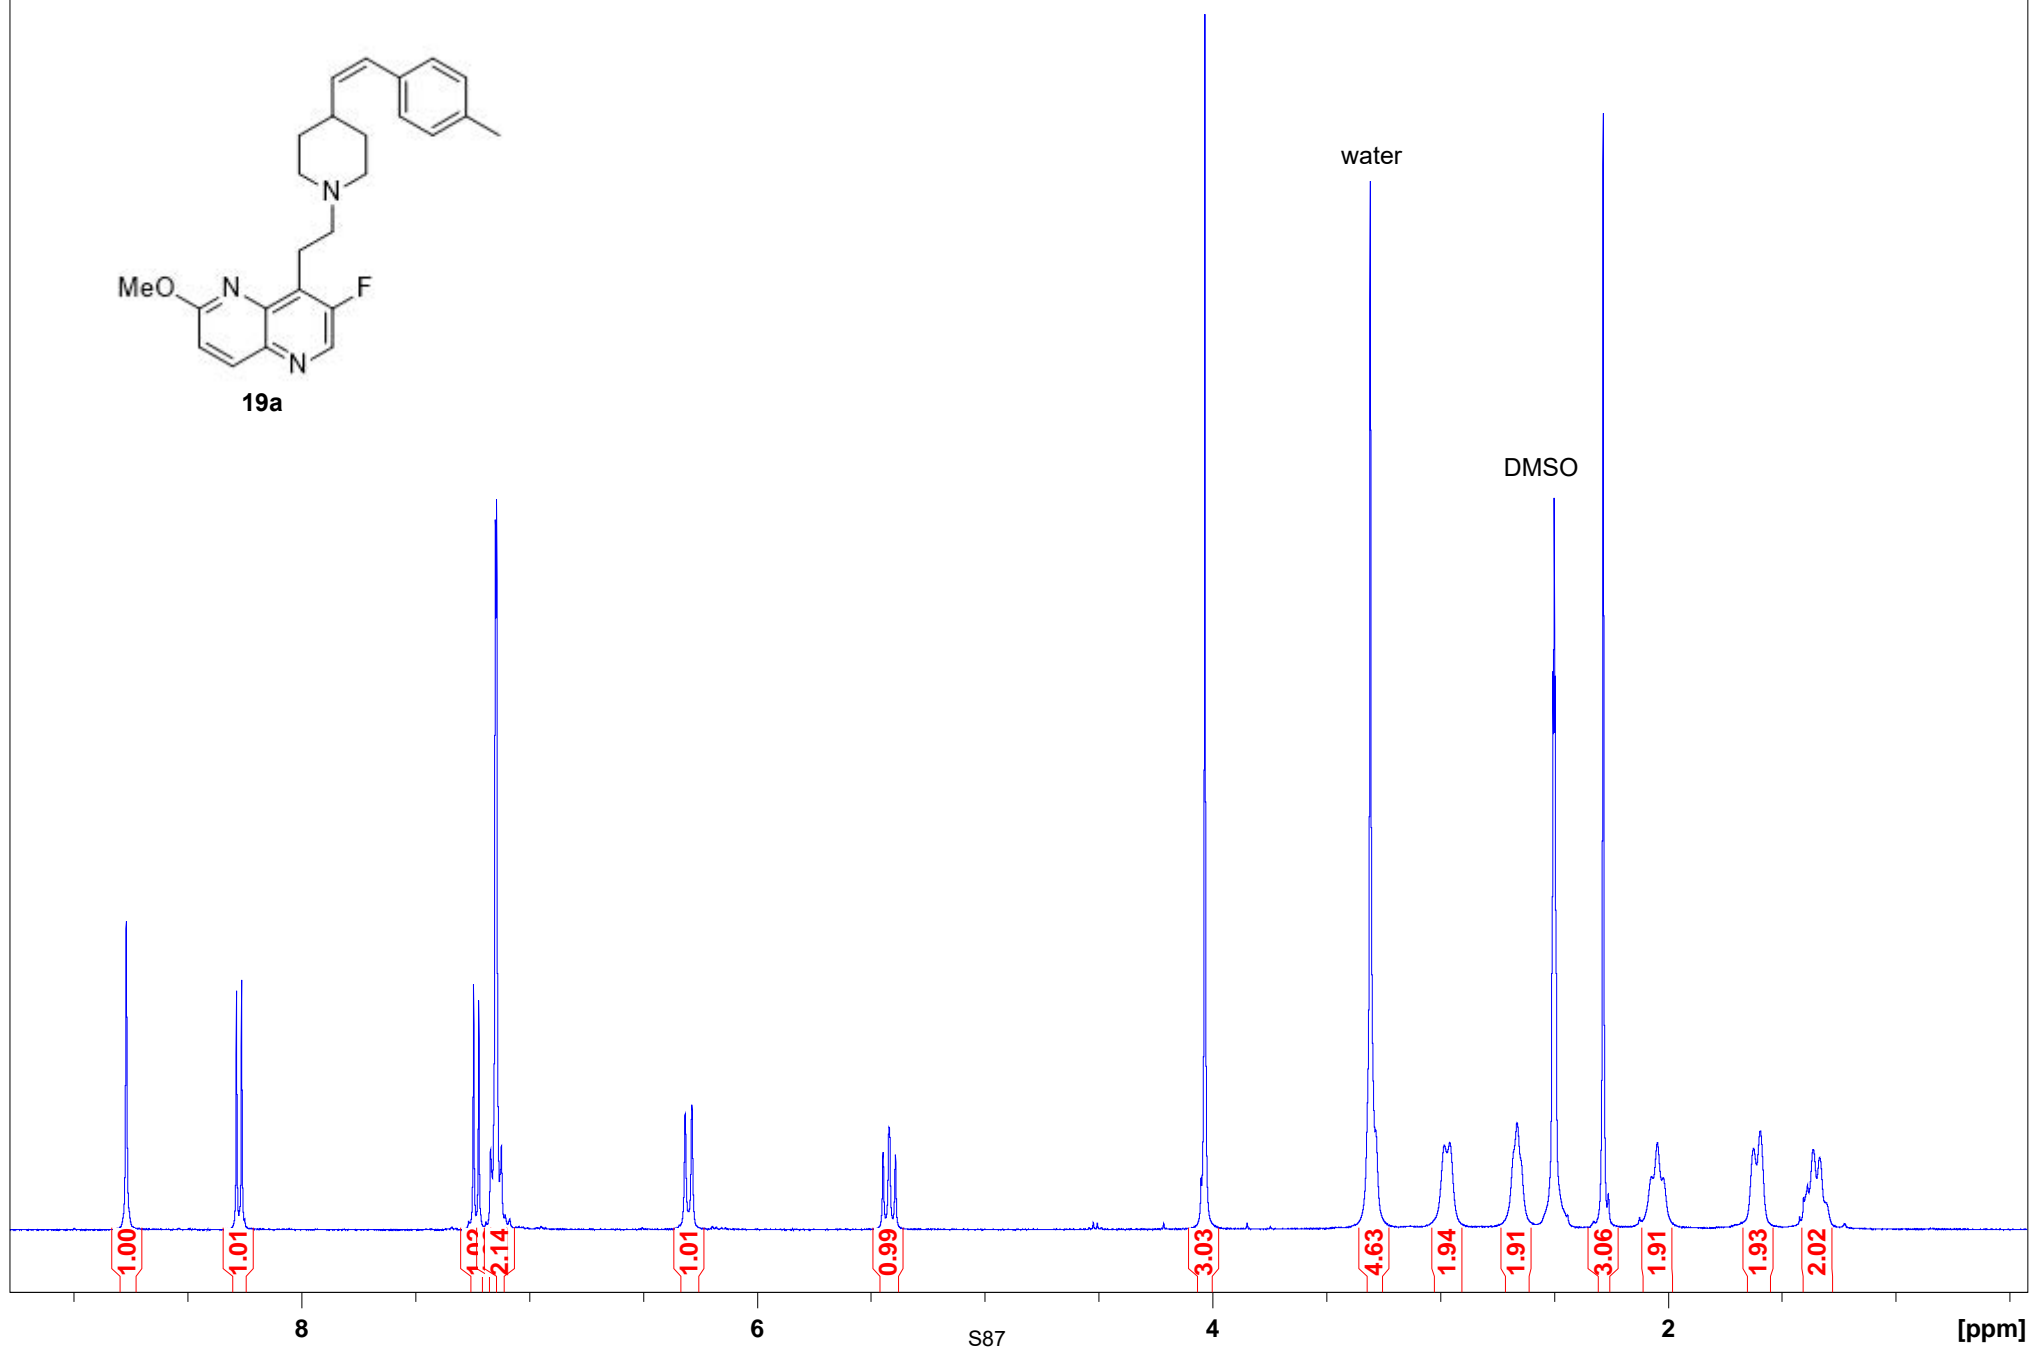

DMSO

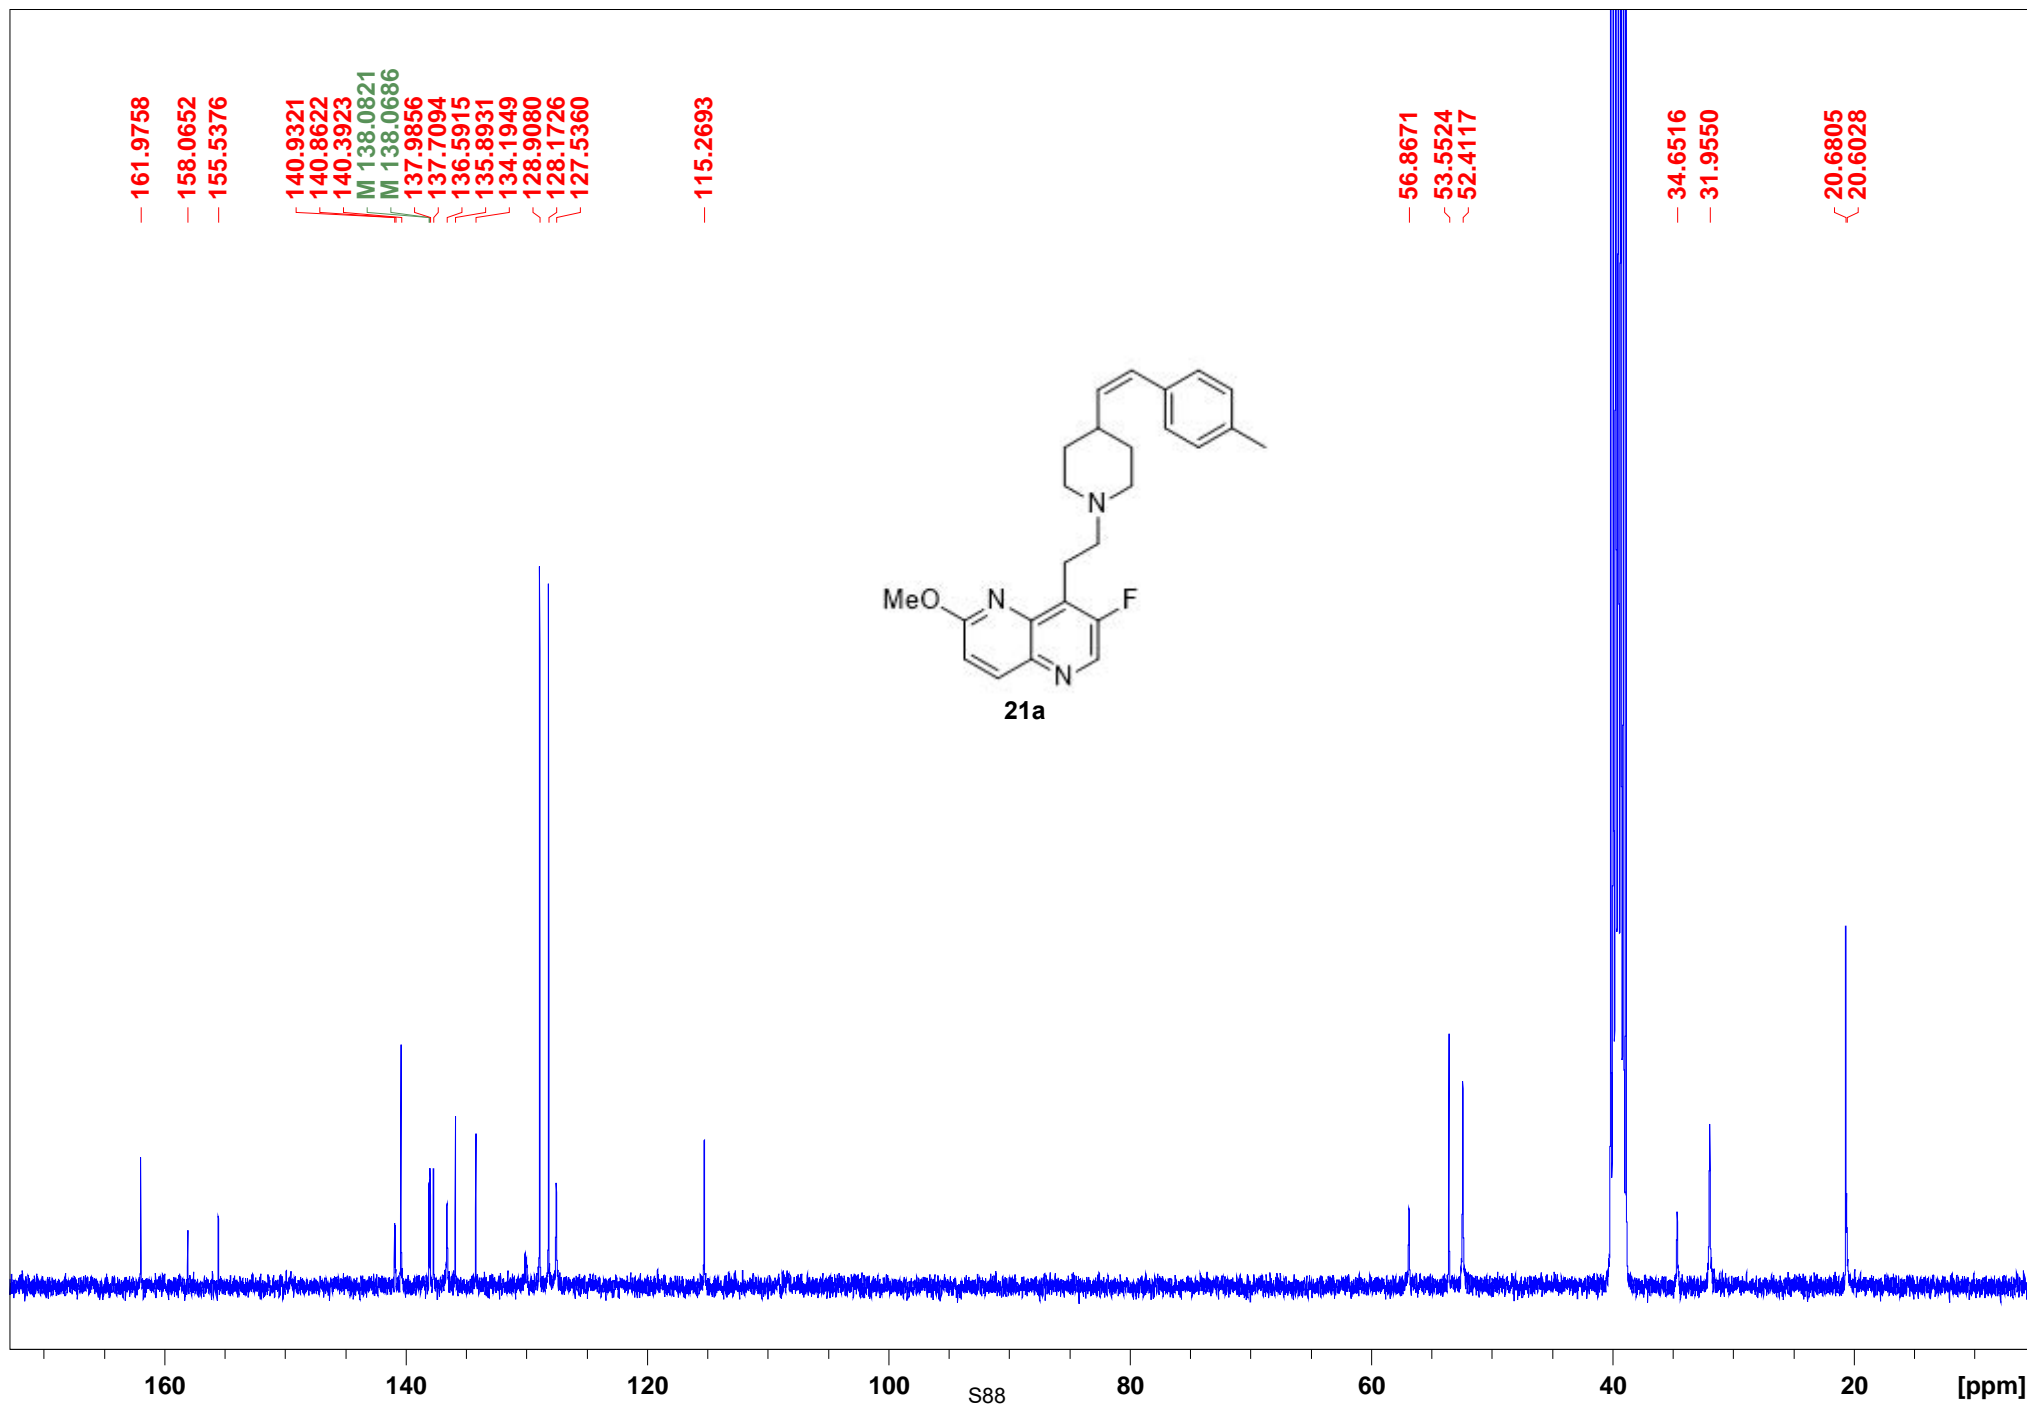



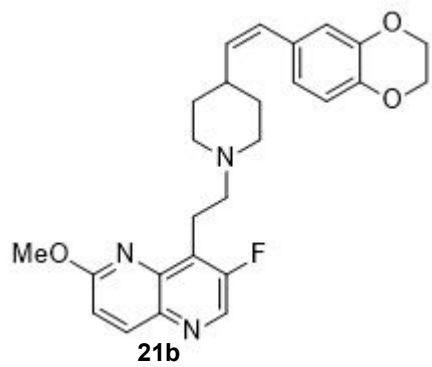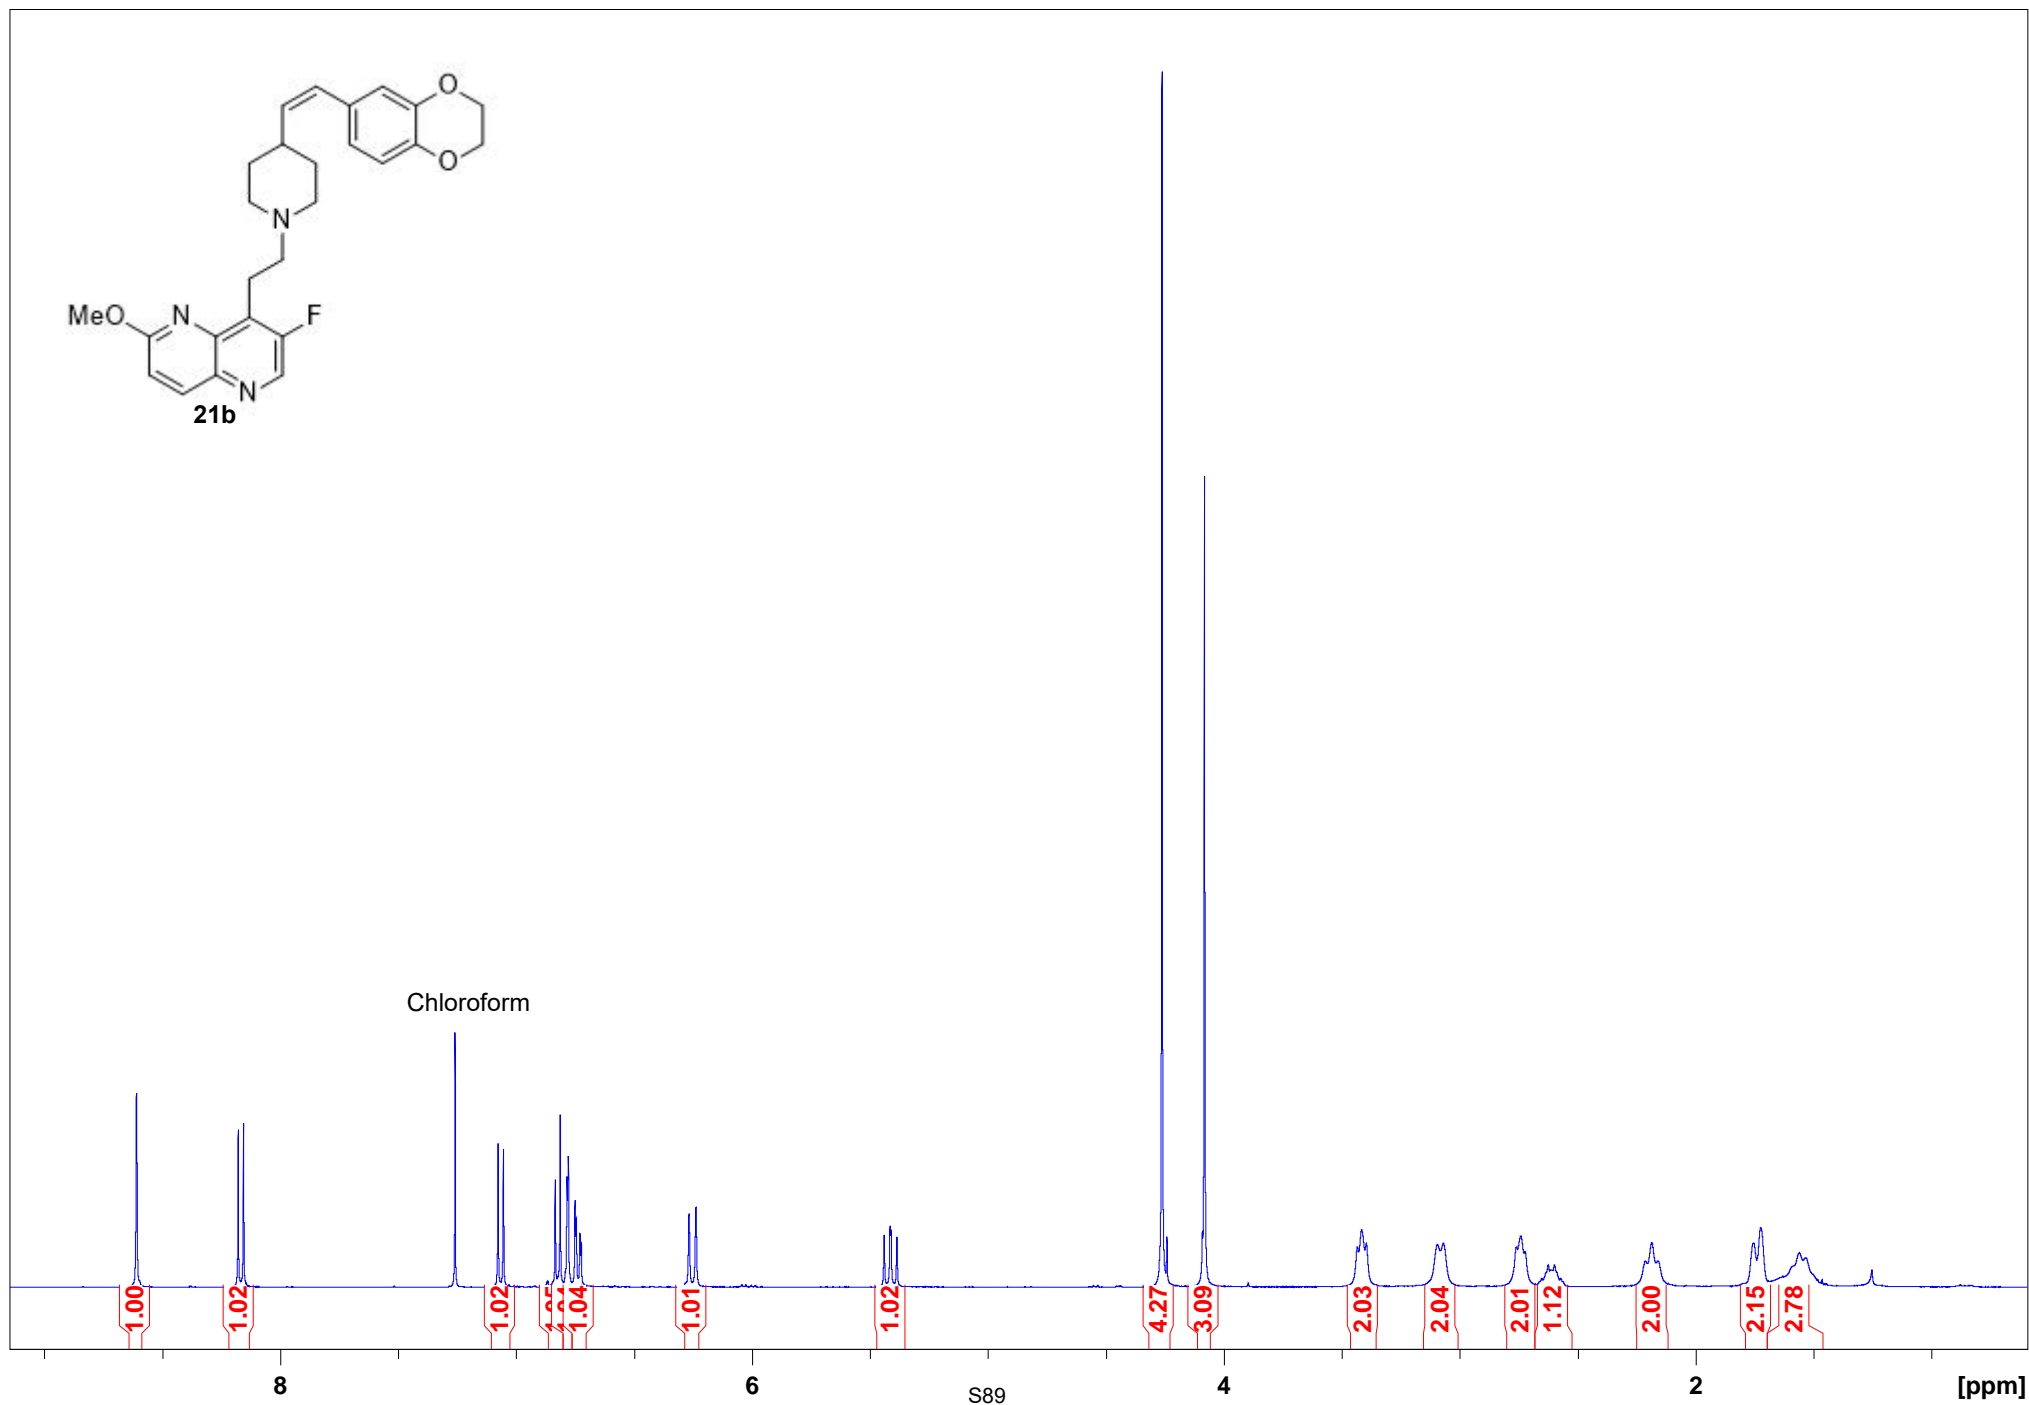

Chloroform

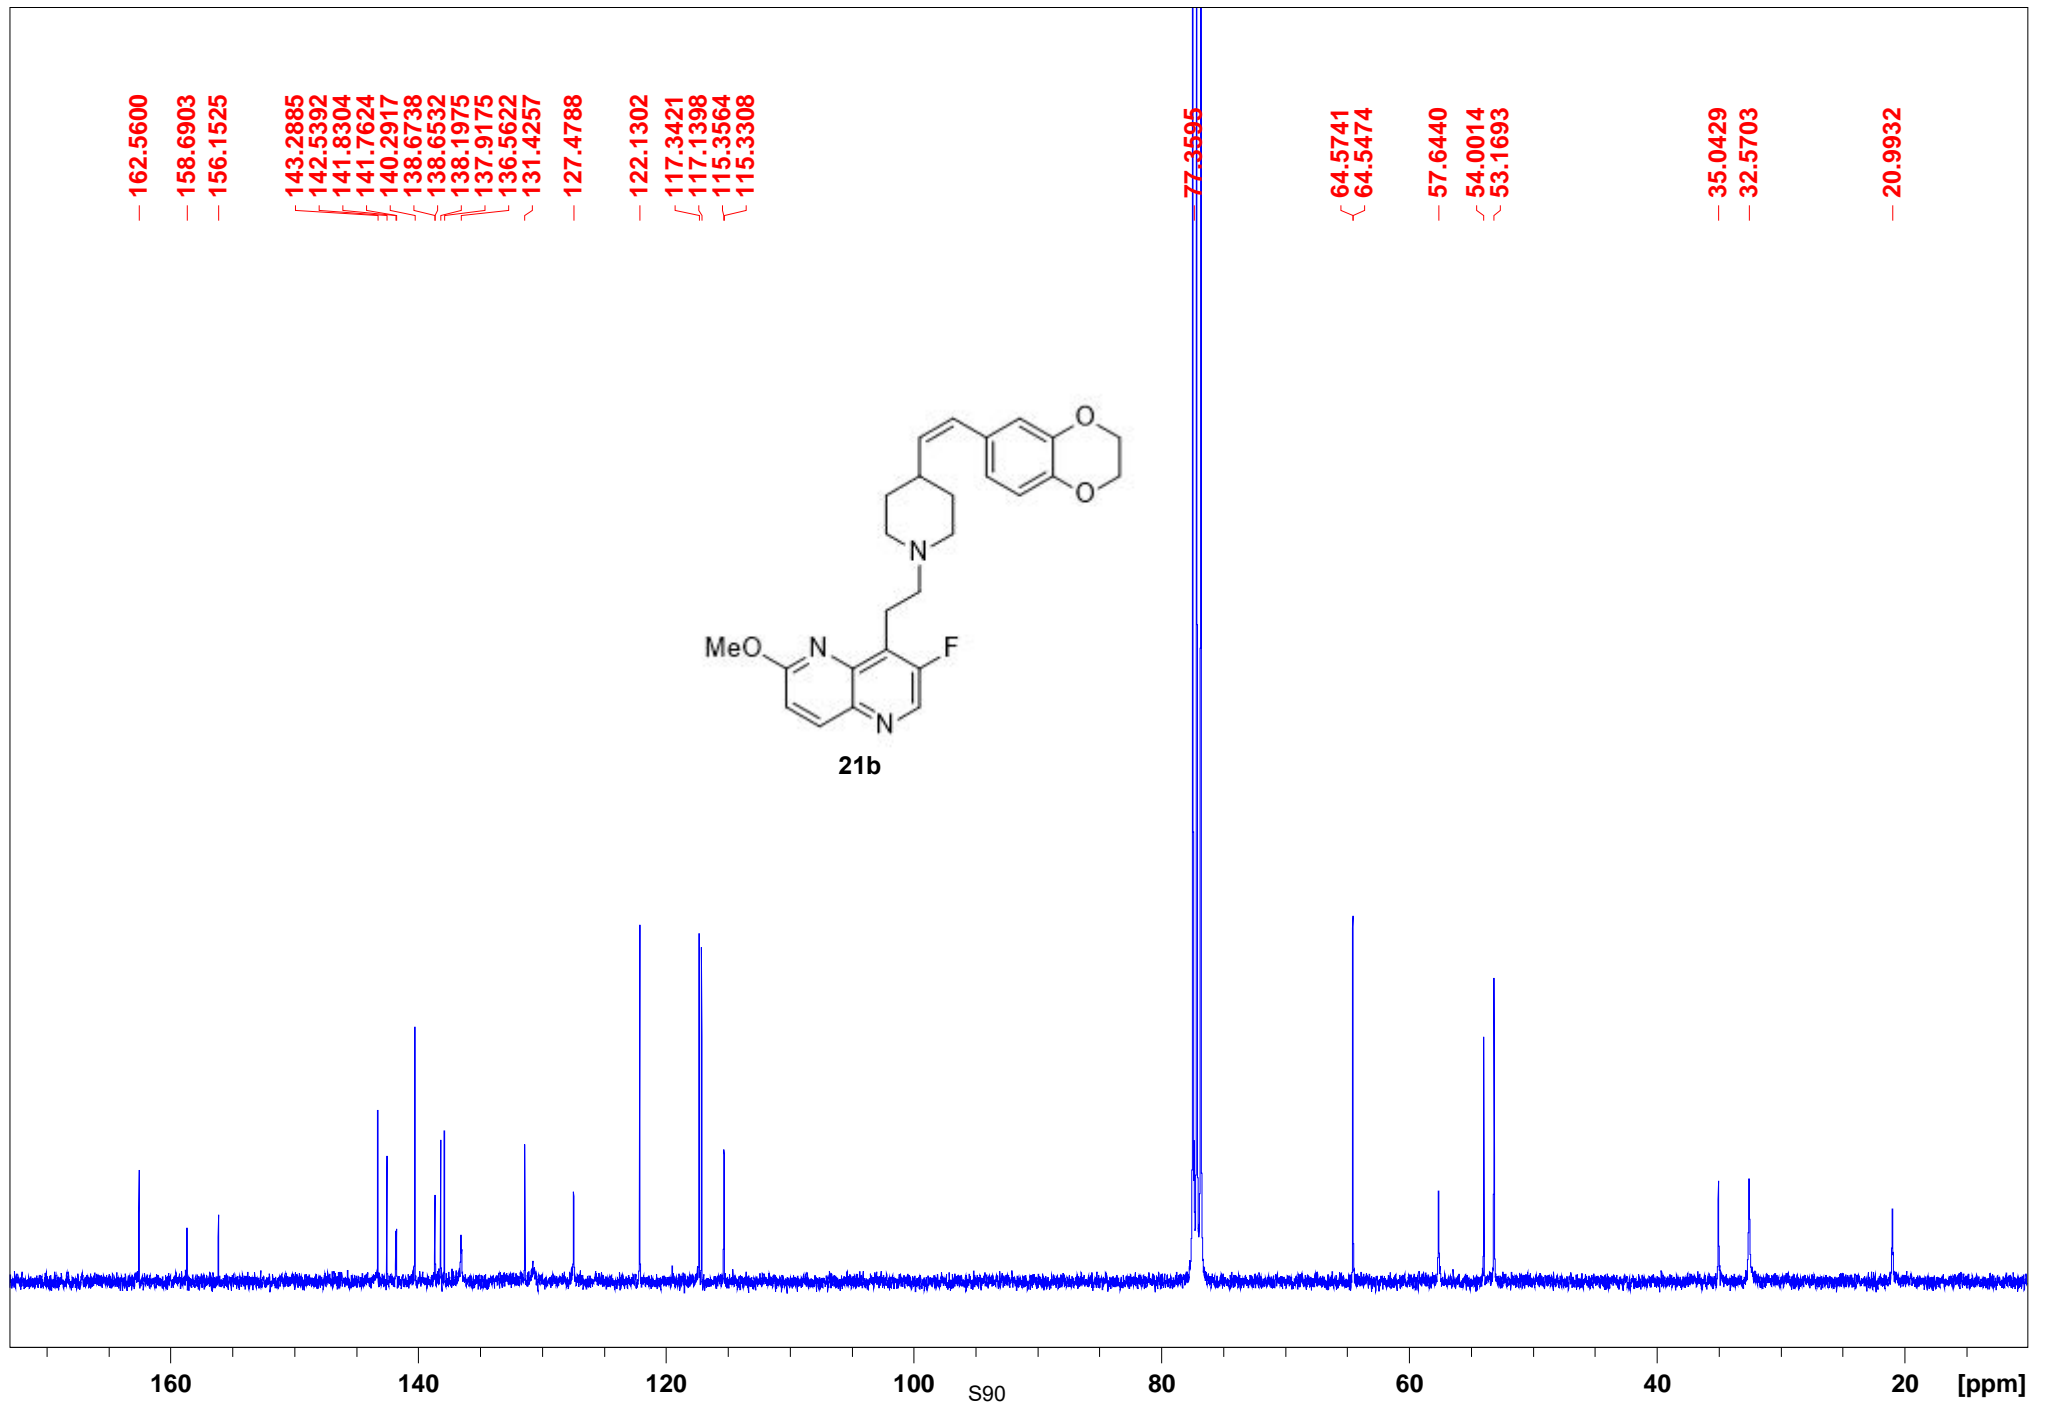

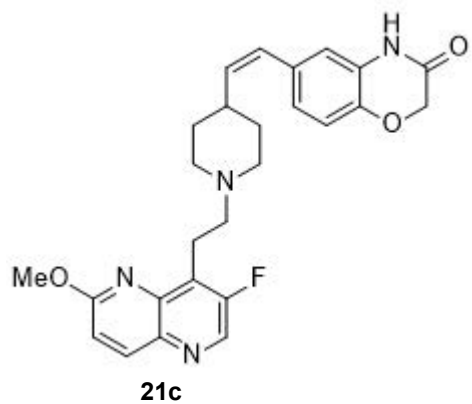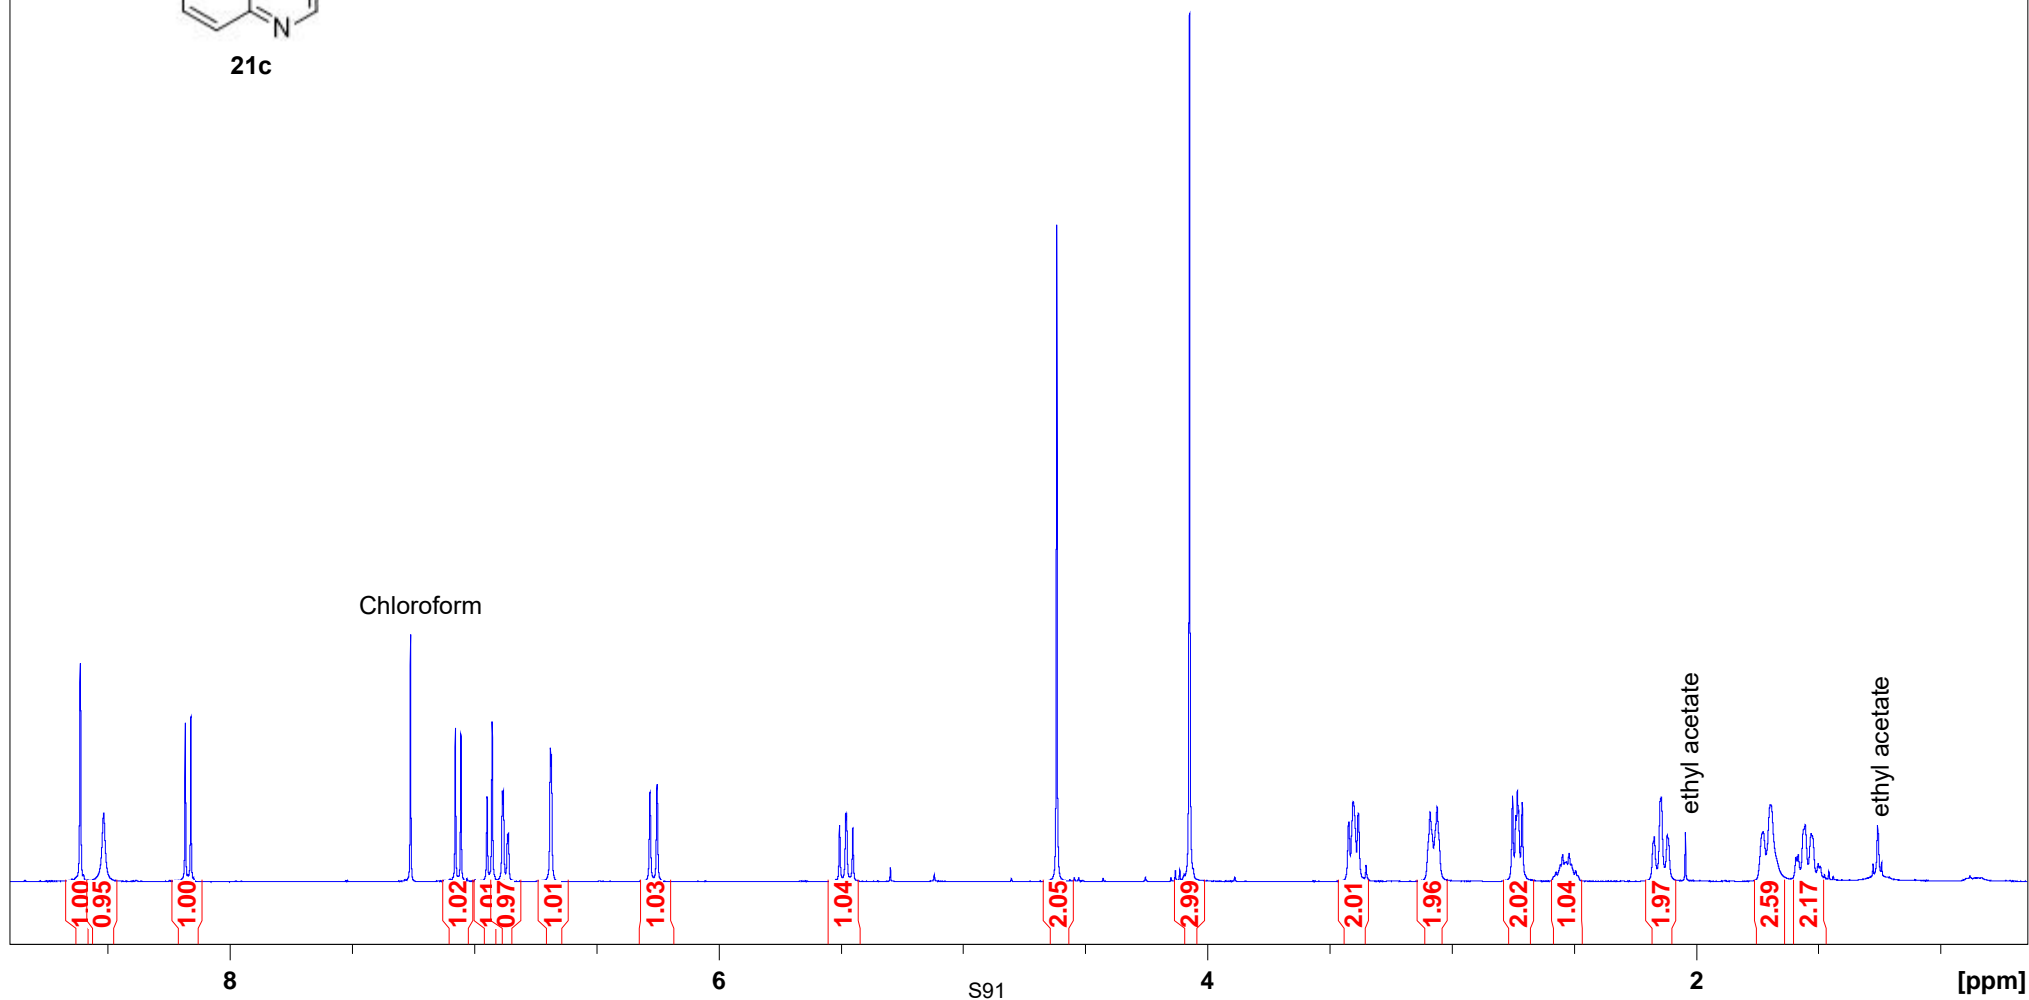

Chloroform

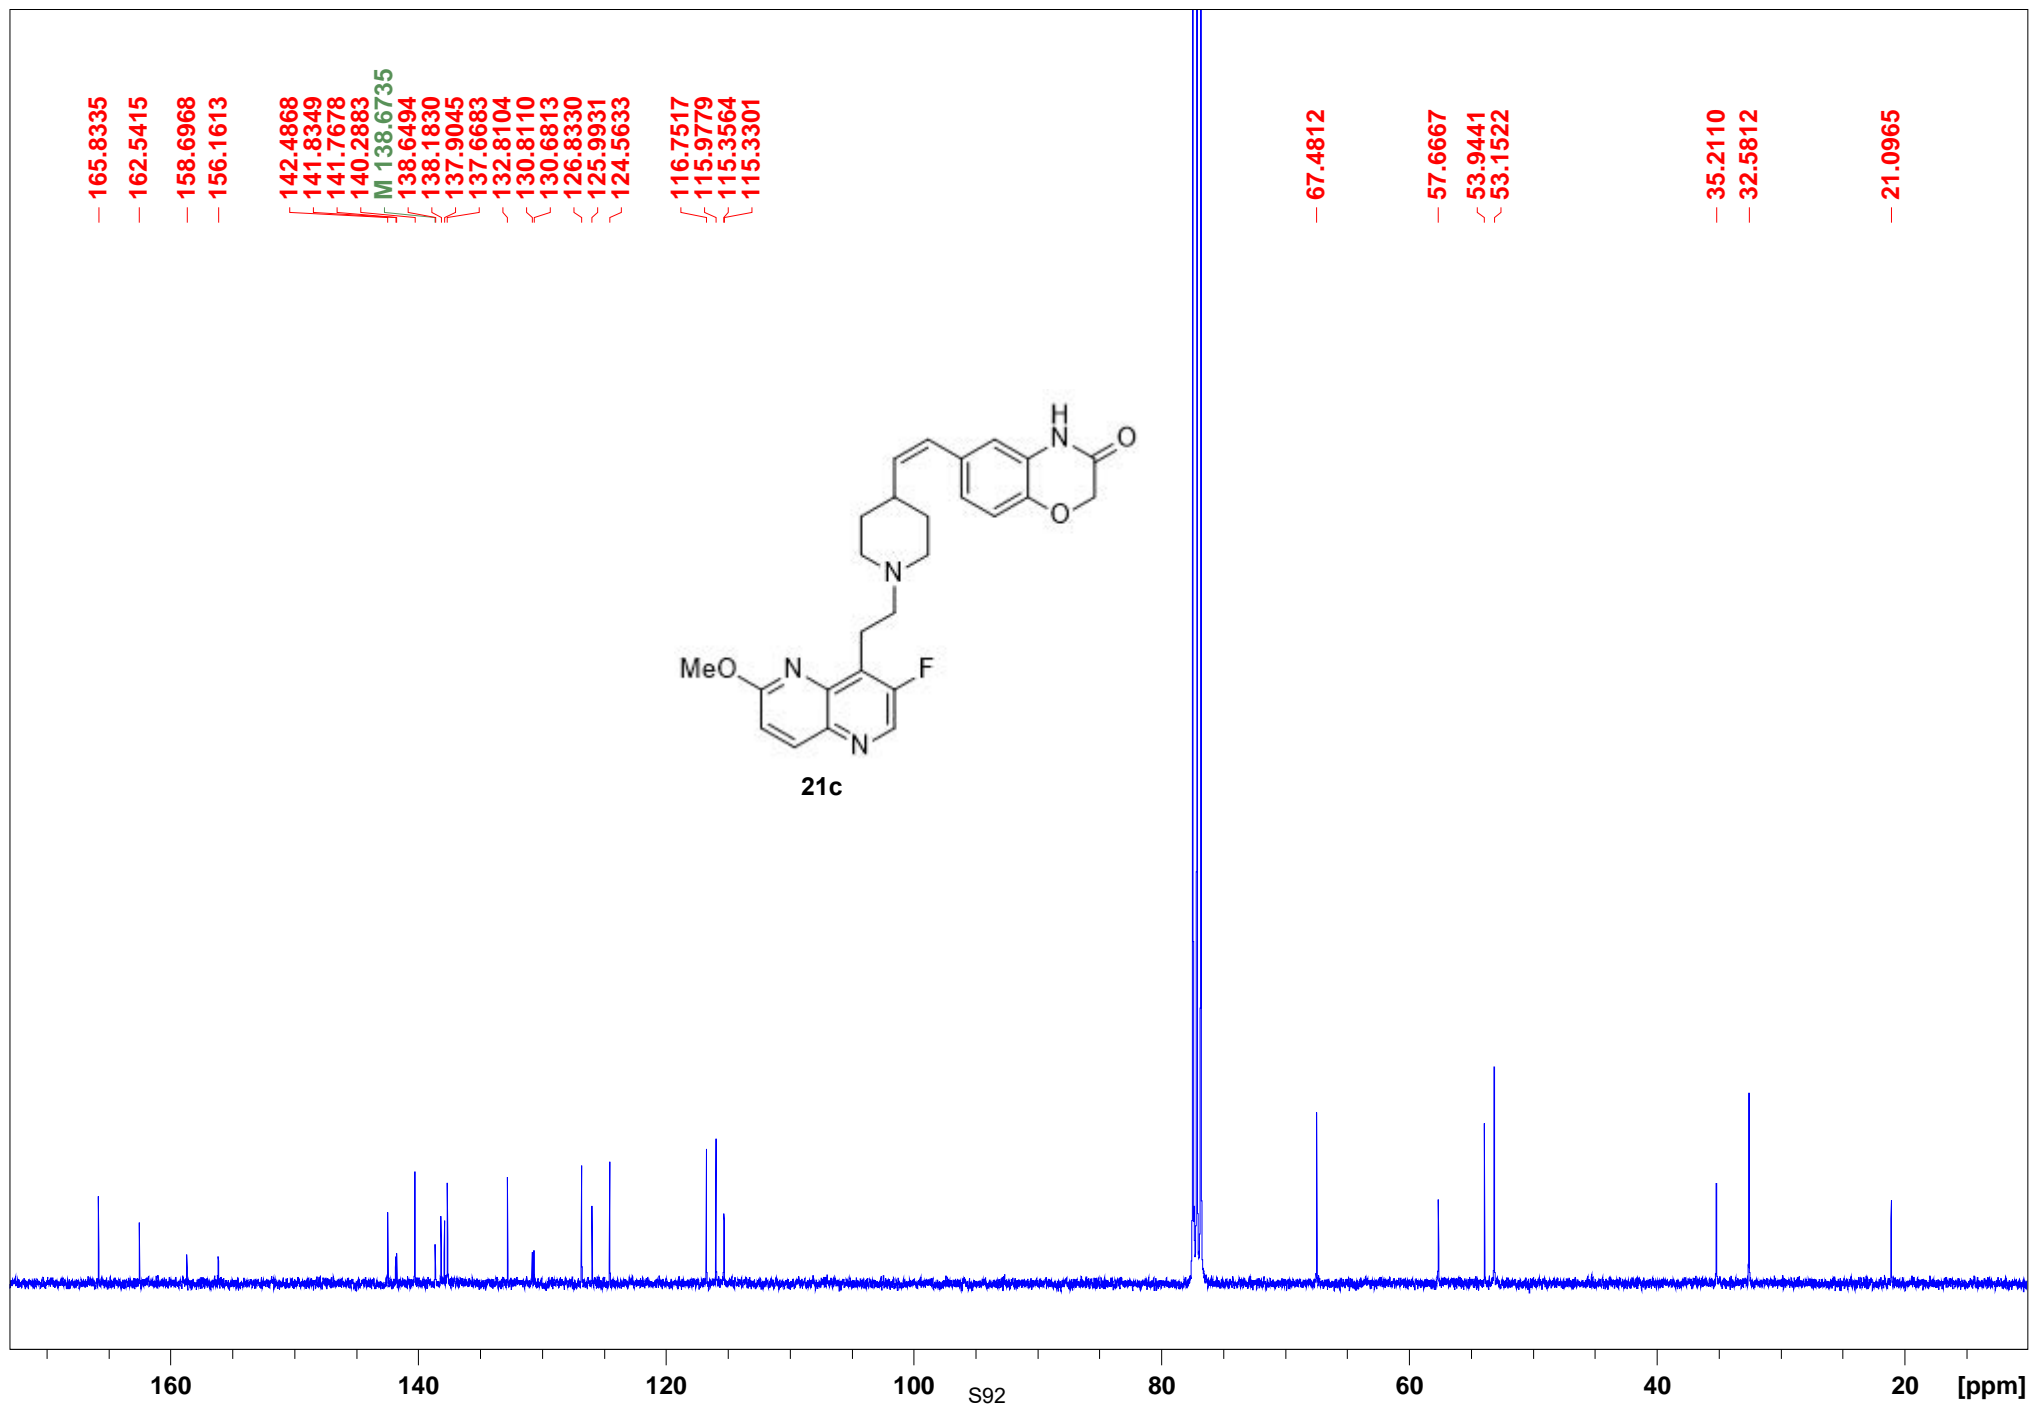

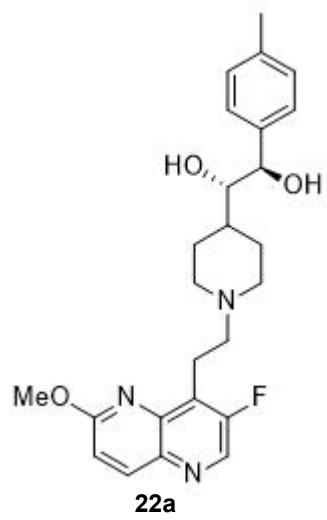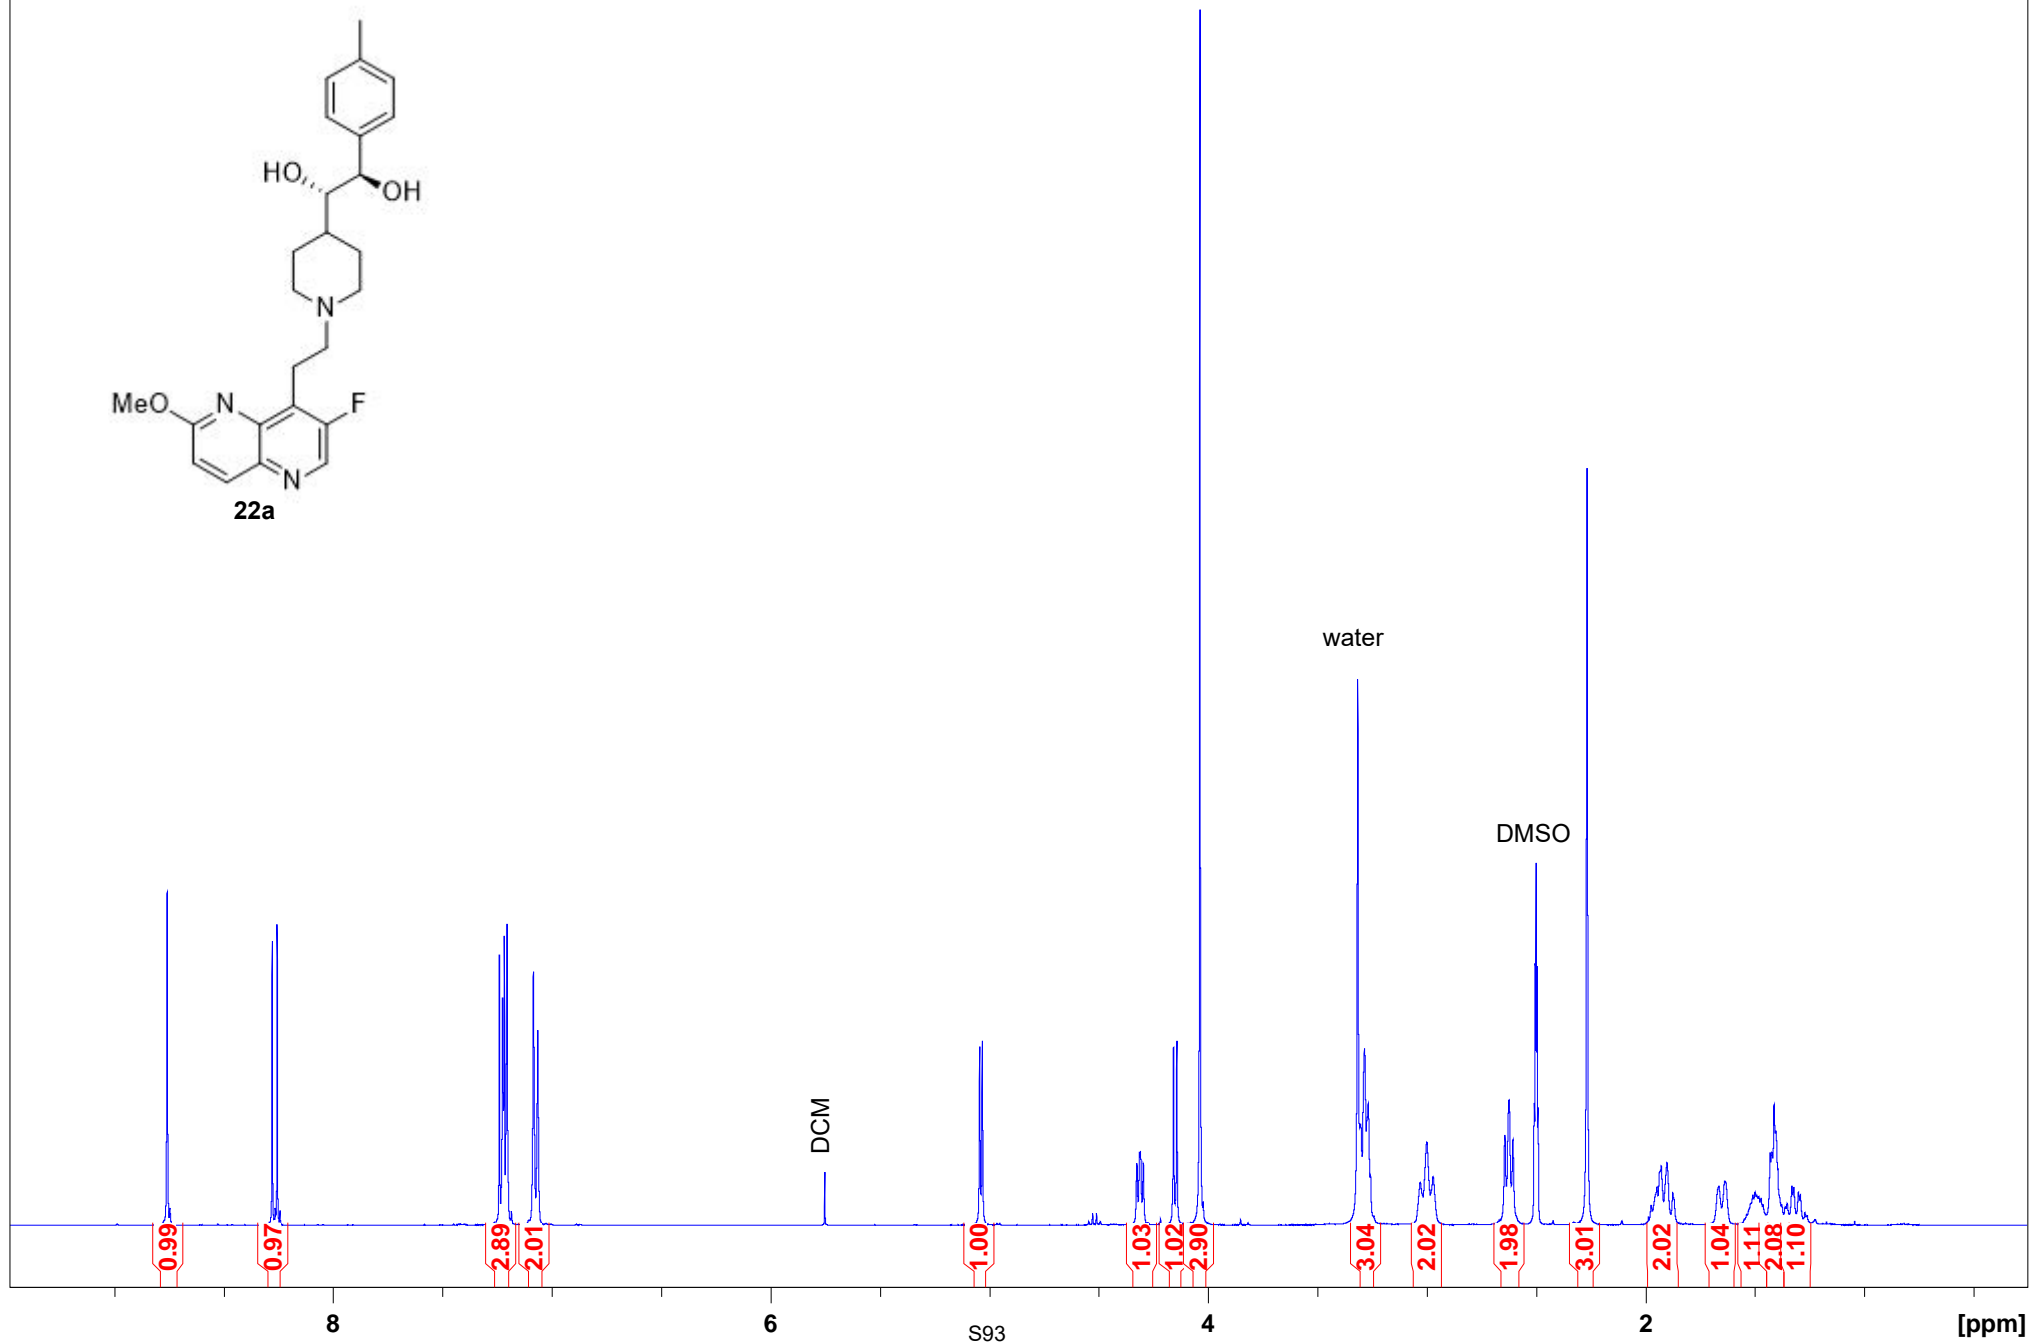

DMSO

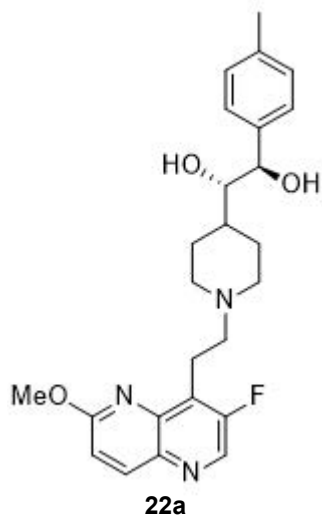

161.9452  
158.0842  
155.5601  
141.2870  
140.9604  
140.8899  
140.3935  
138.0773  
138.0582  
137.9814  
137.7045  
135.3652  
130.2511  
130.1219  
127.9477  
127.3598  
115.2666  
115.2419

77.1473  
73.2915

56.9510  
53.5301  
53.4538  
53.2749

37.2678  
29.1174  
25.3861  
20.6894

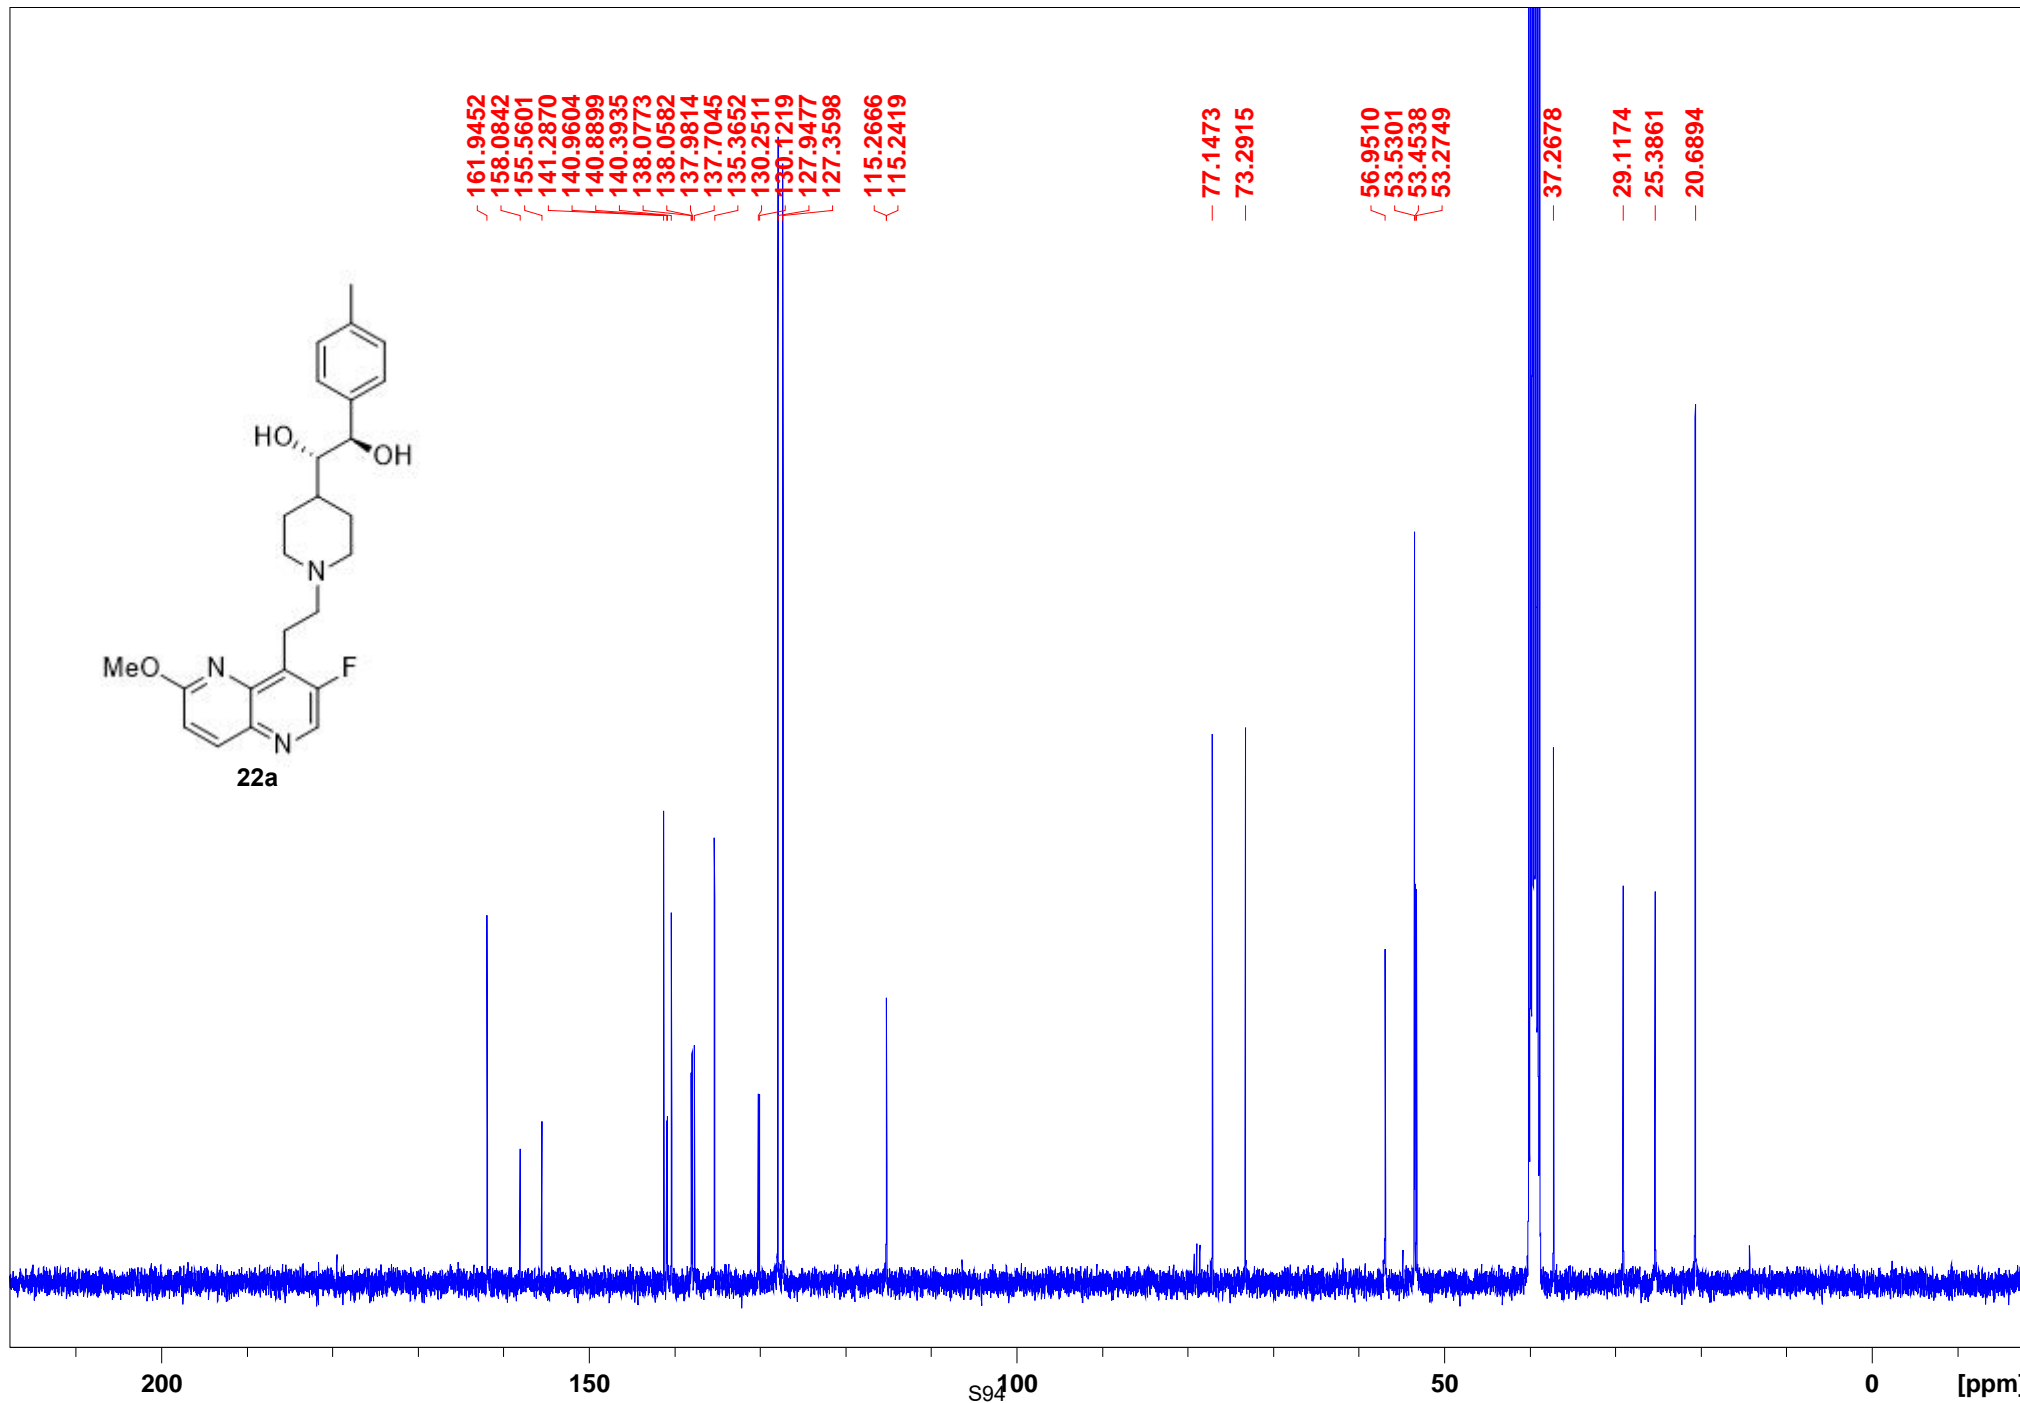

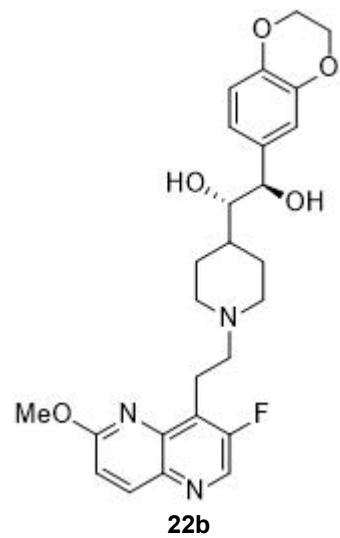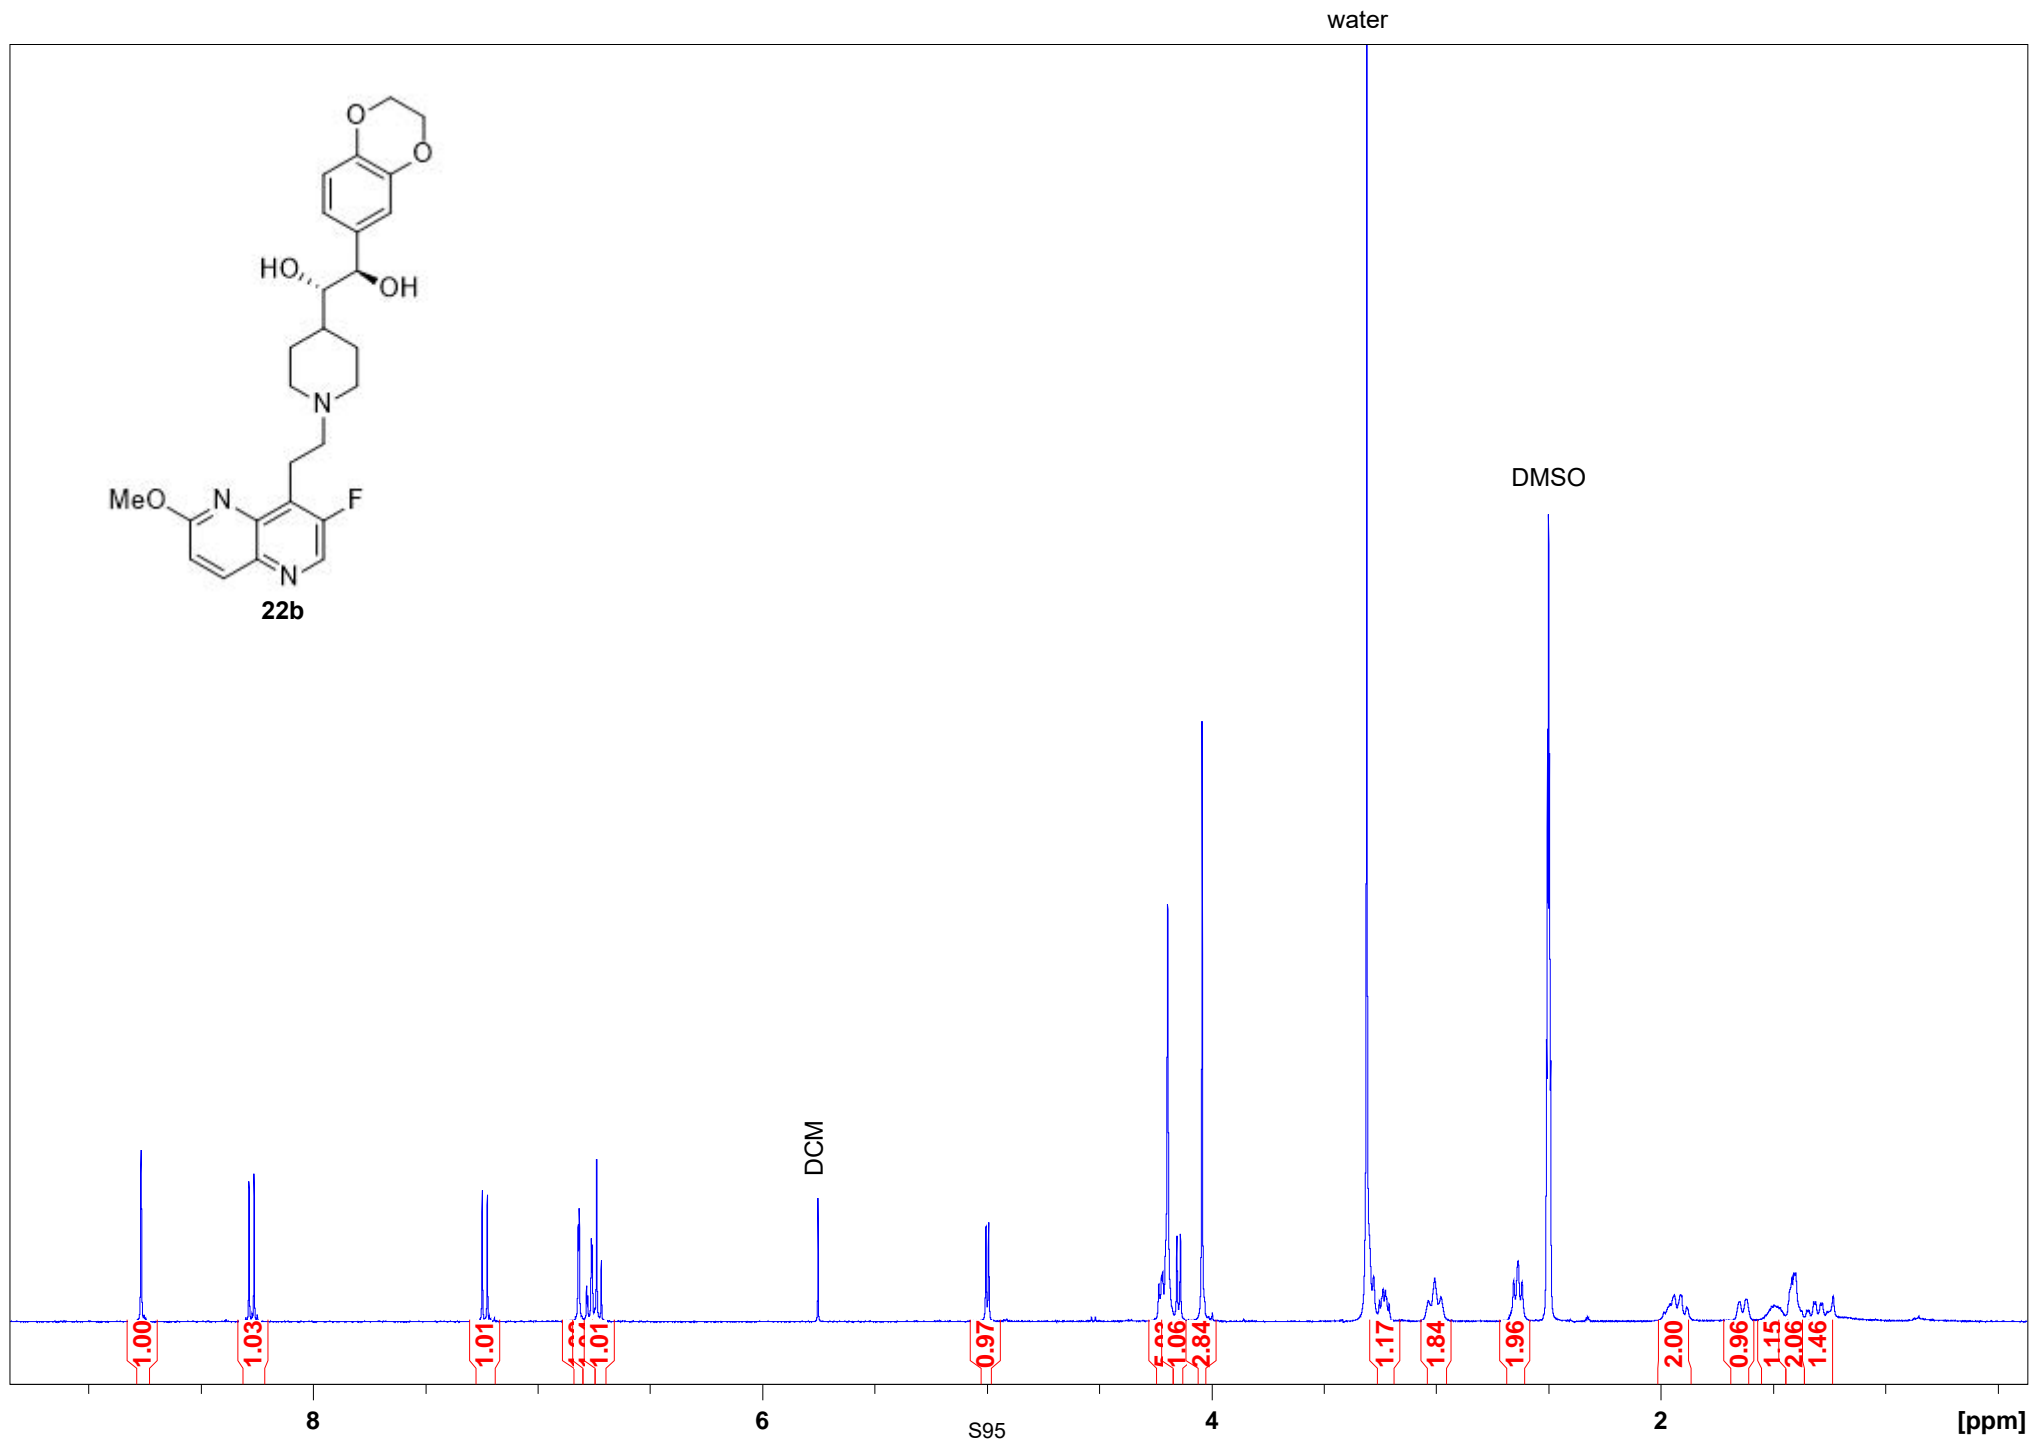

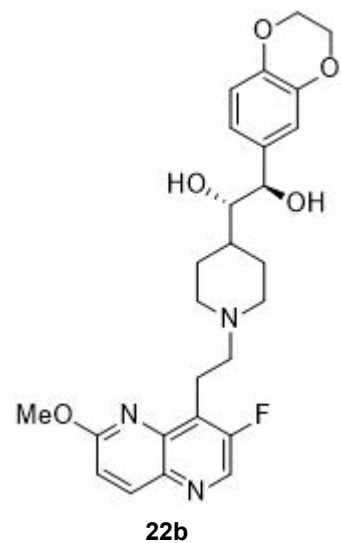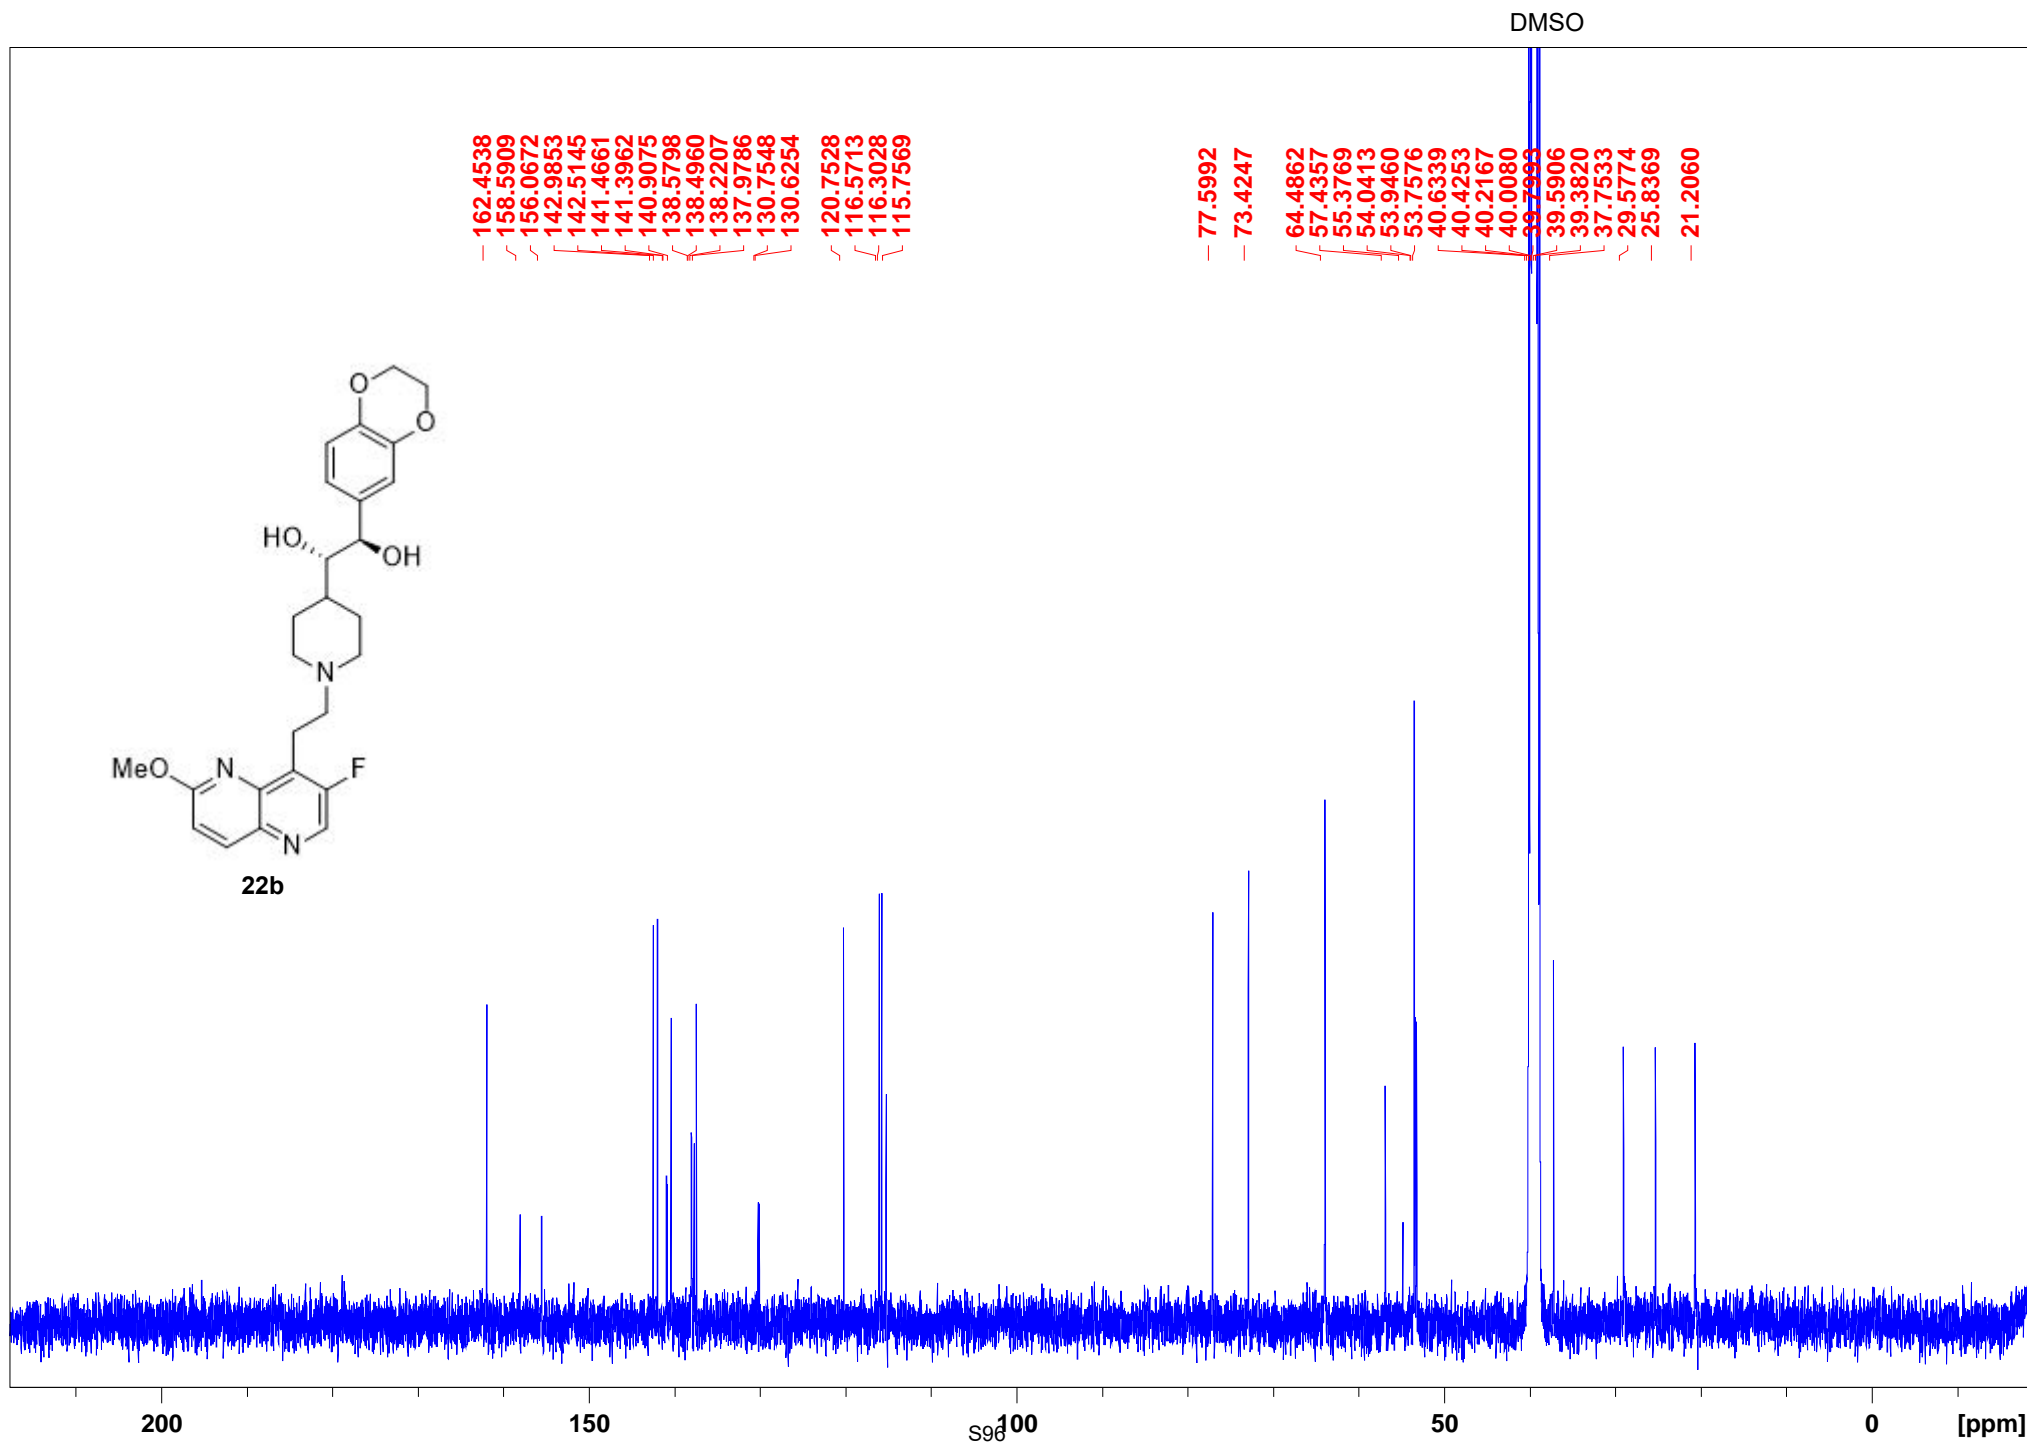



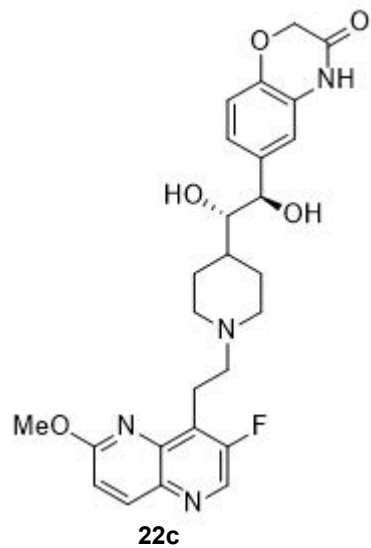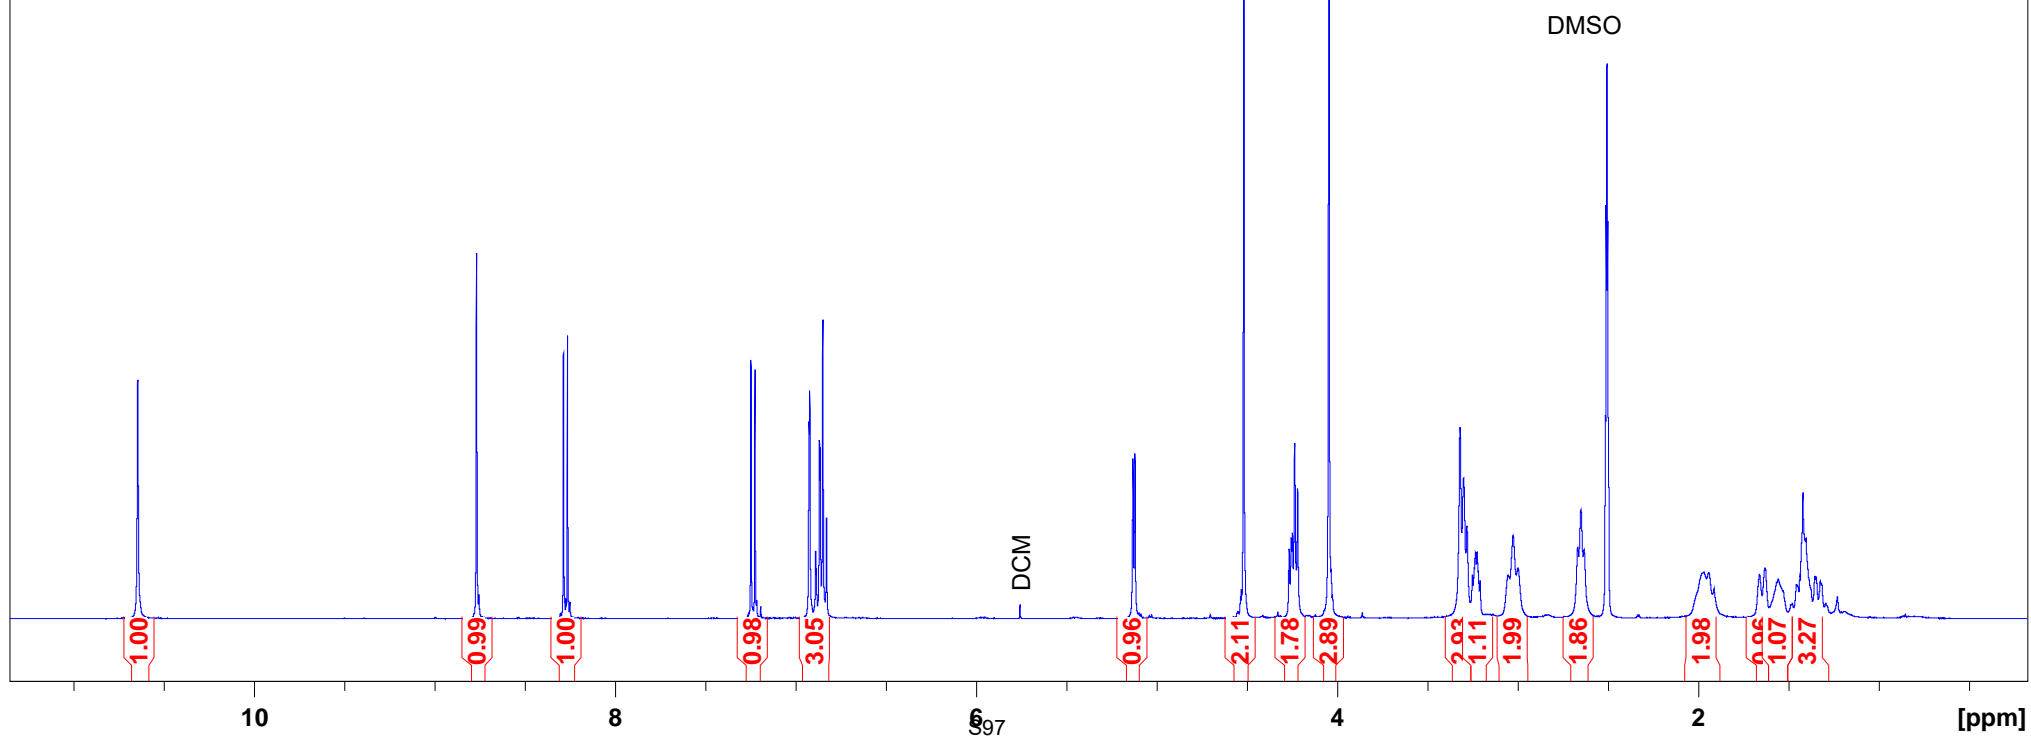

DMSO

164.9748  
161.9527  
158.0801  
155.5570

141.9591  
140.9502  
140.8810  
140.3974  
138.8915  
138.0760  
138.0611  
137.9877  
137.7111  
M 130.0476  
126.3582

122.0775  
115.2725  
M 115.2528  
114.9894  
114.9672

77.0654  
72.9340  
66.7680

56.8930  
53.5354  
53.4319  
53.2421

37.1960  
29.0773  
25.1189  
20.6729

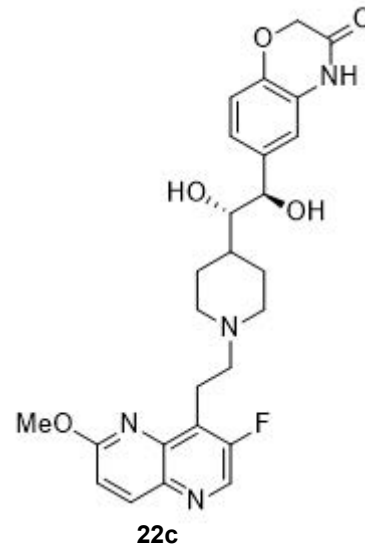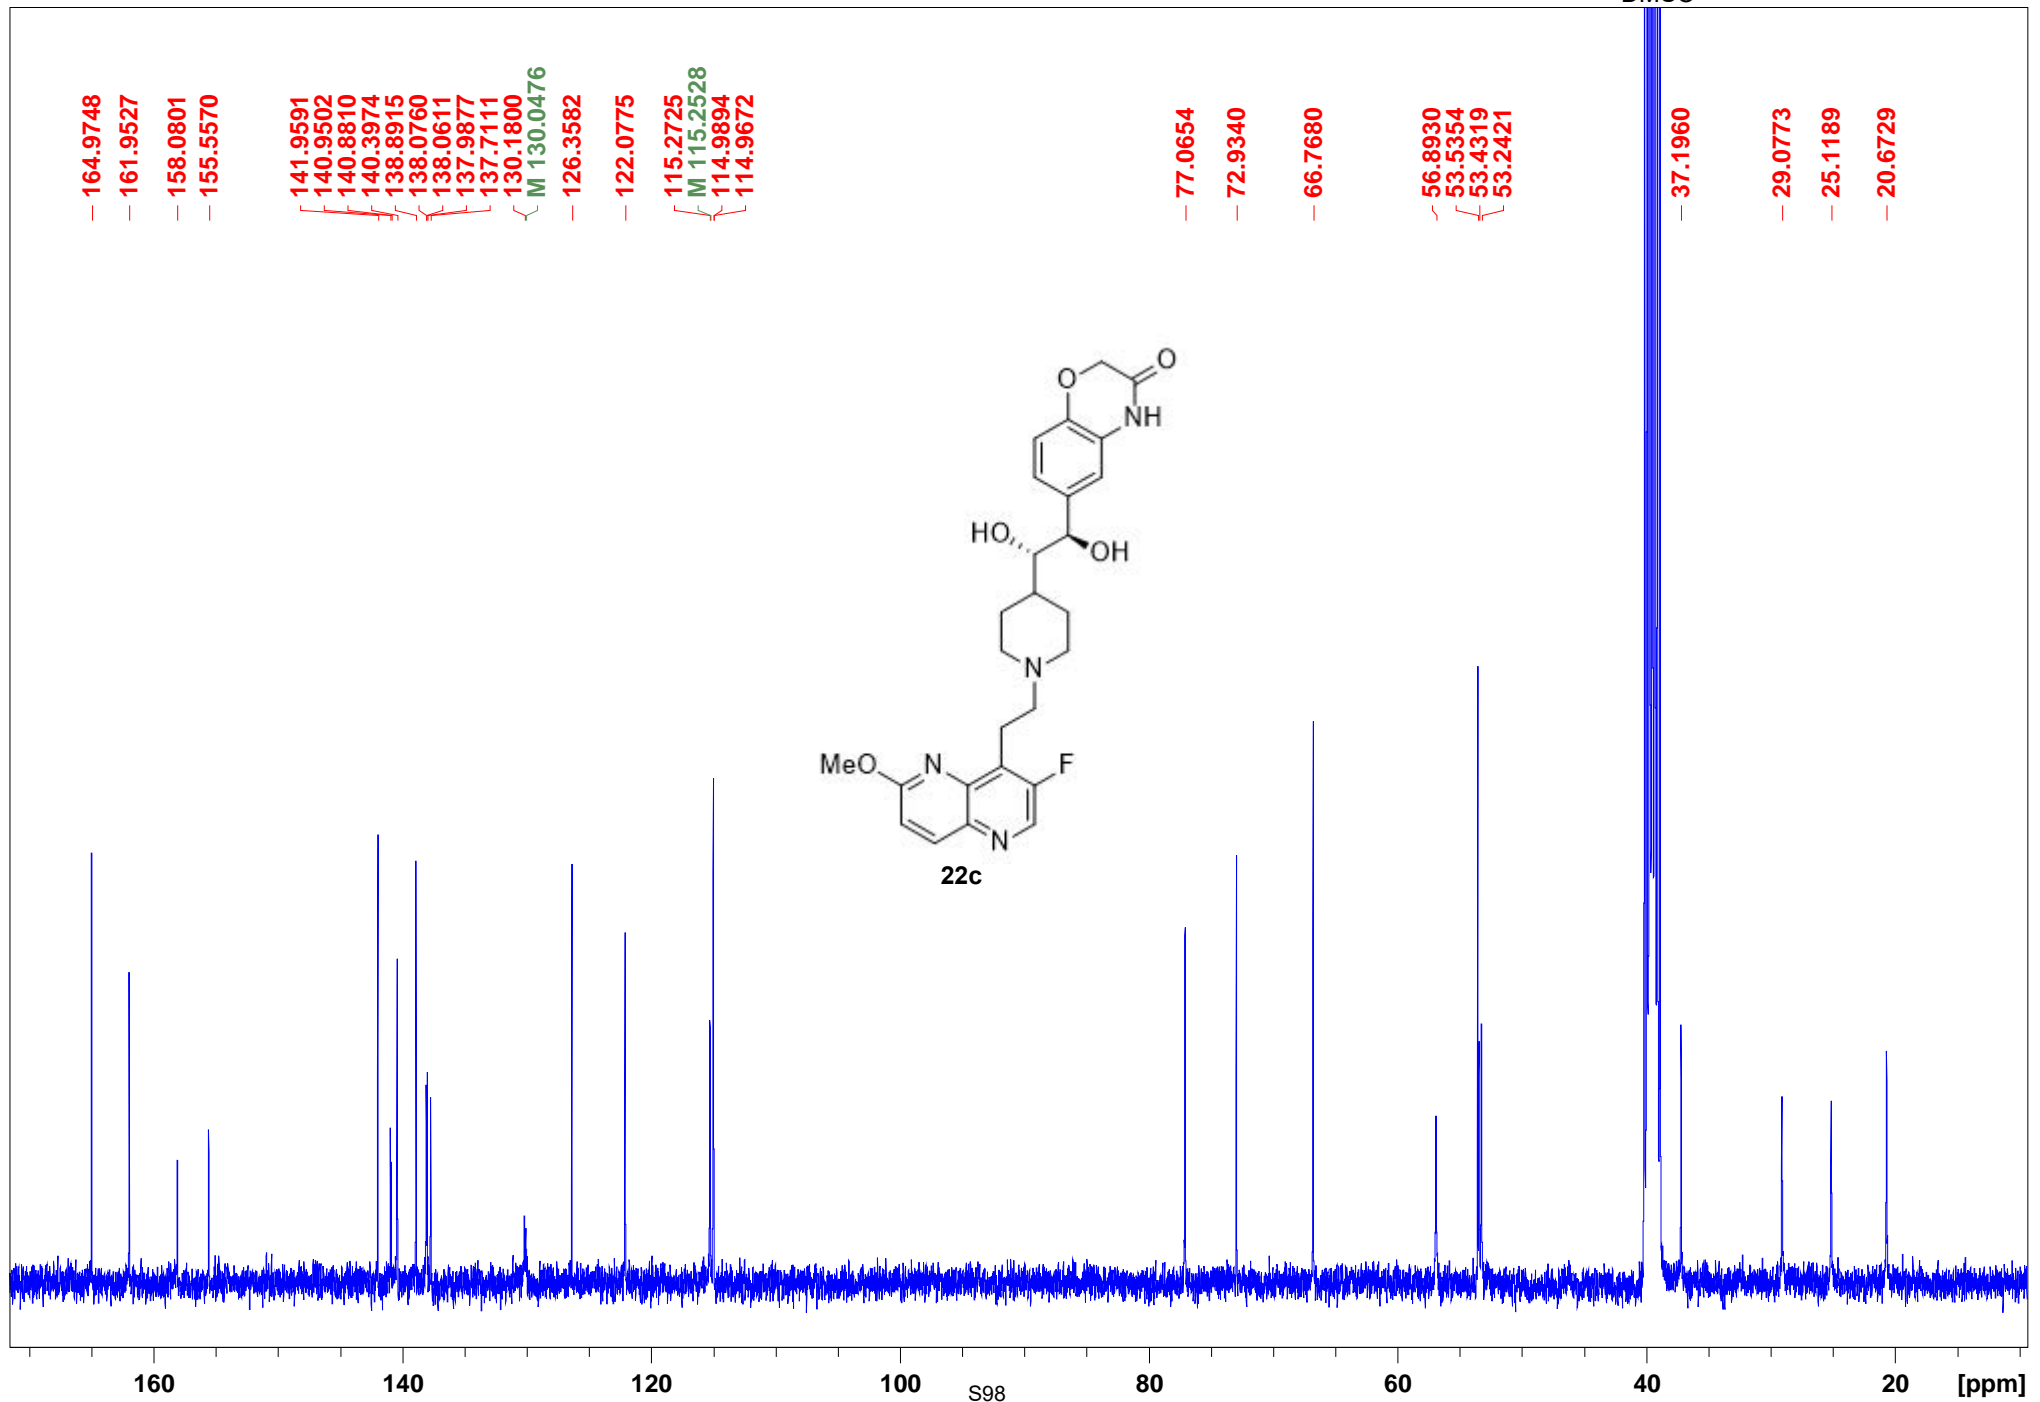

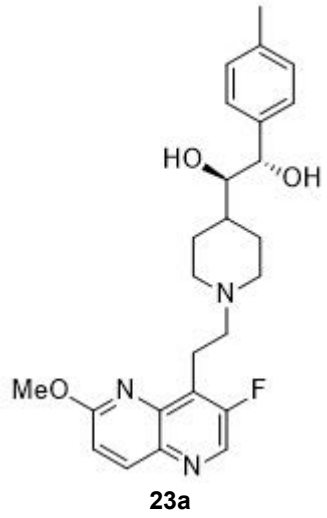

water

DMSO

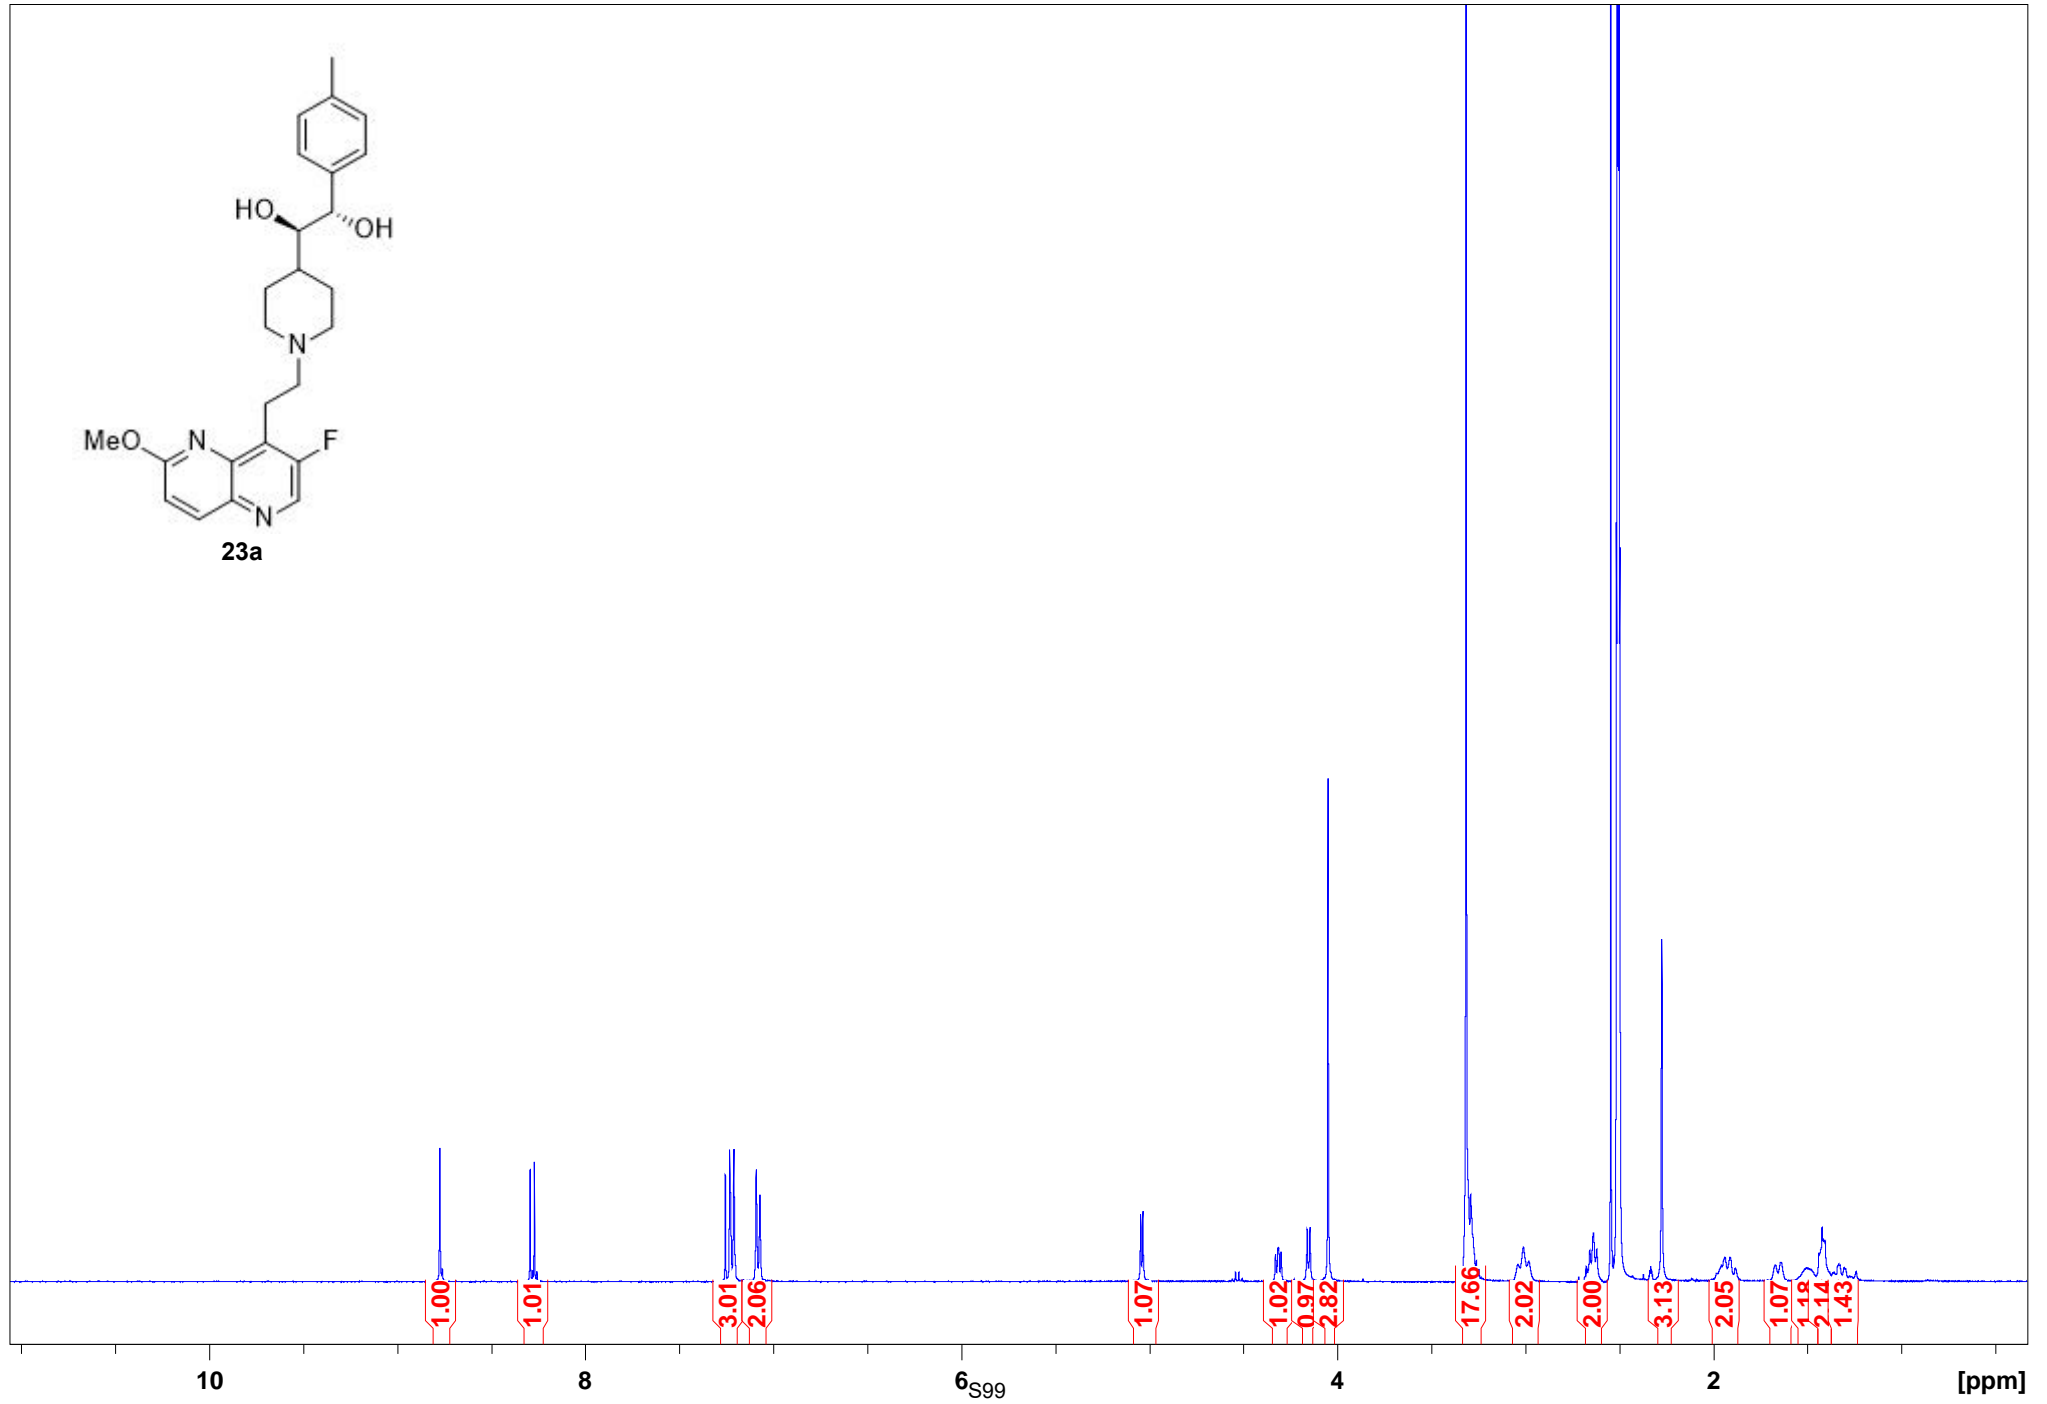

DMSO

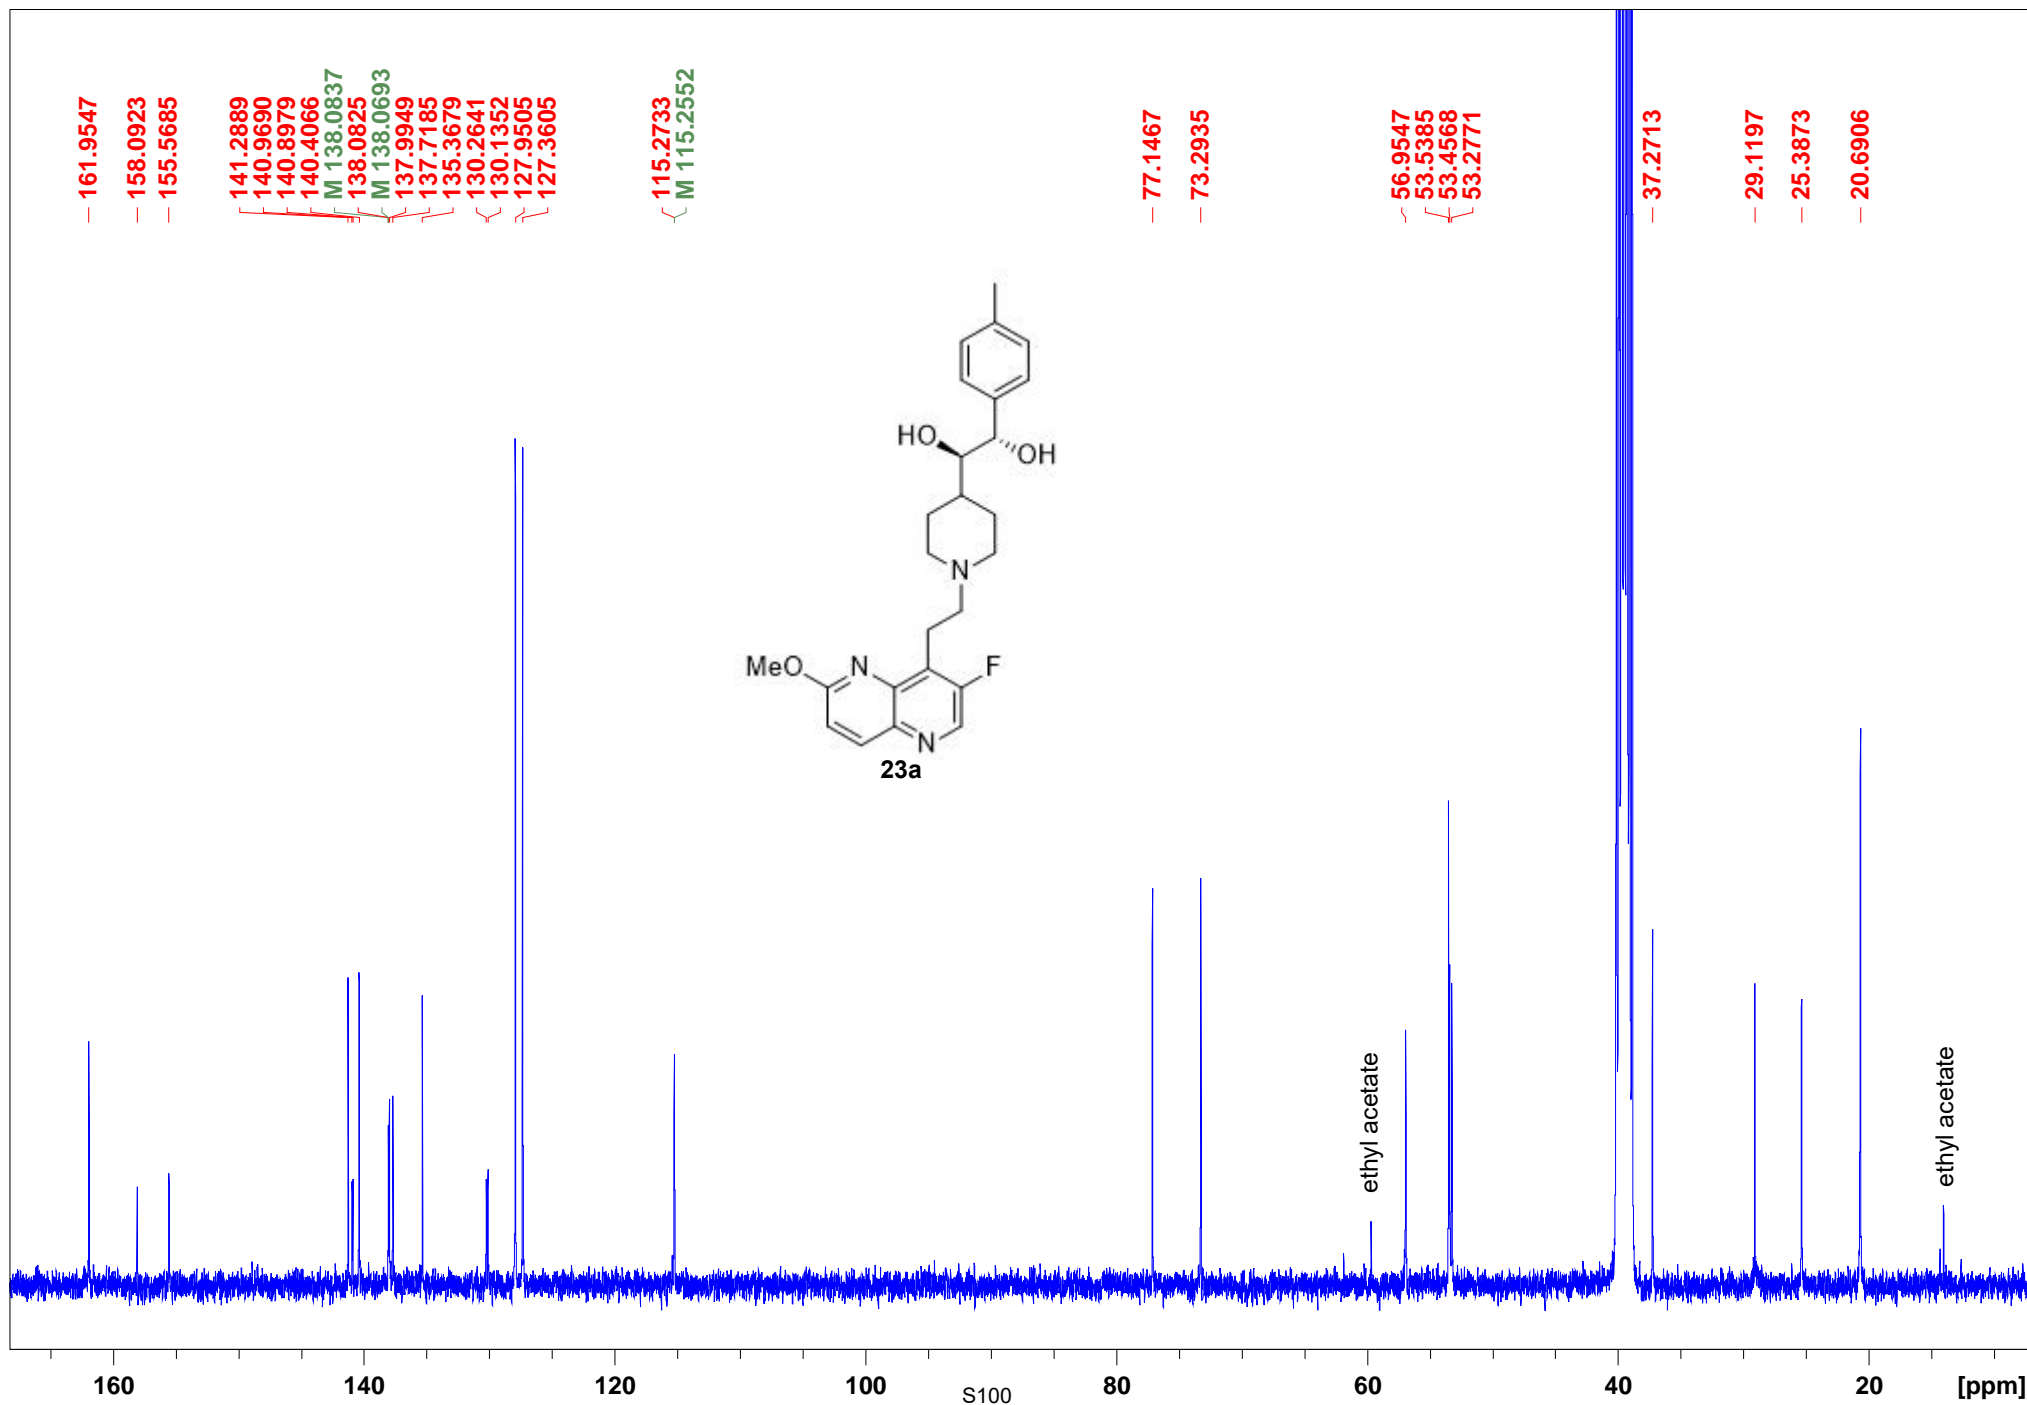

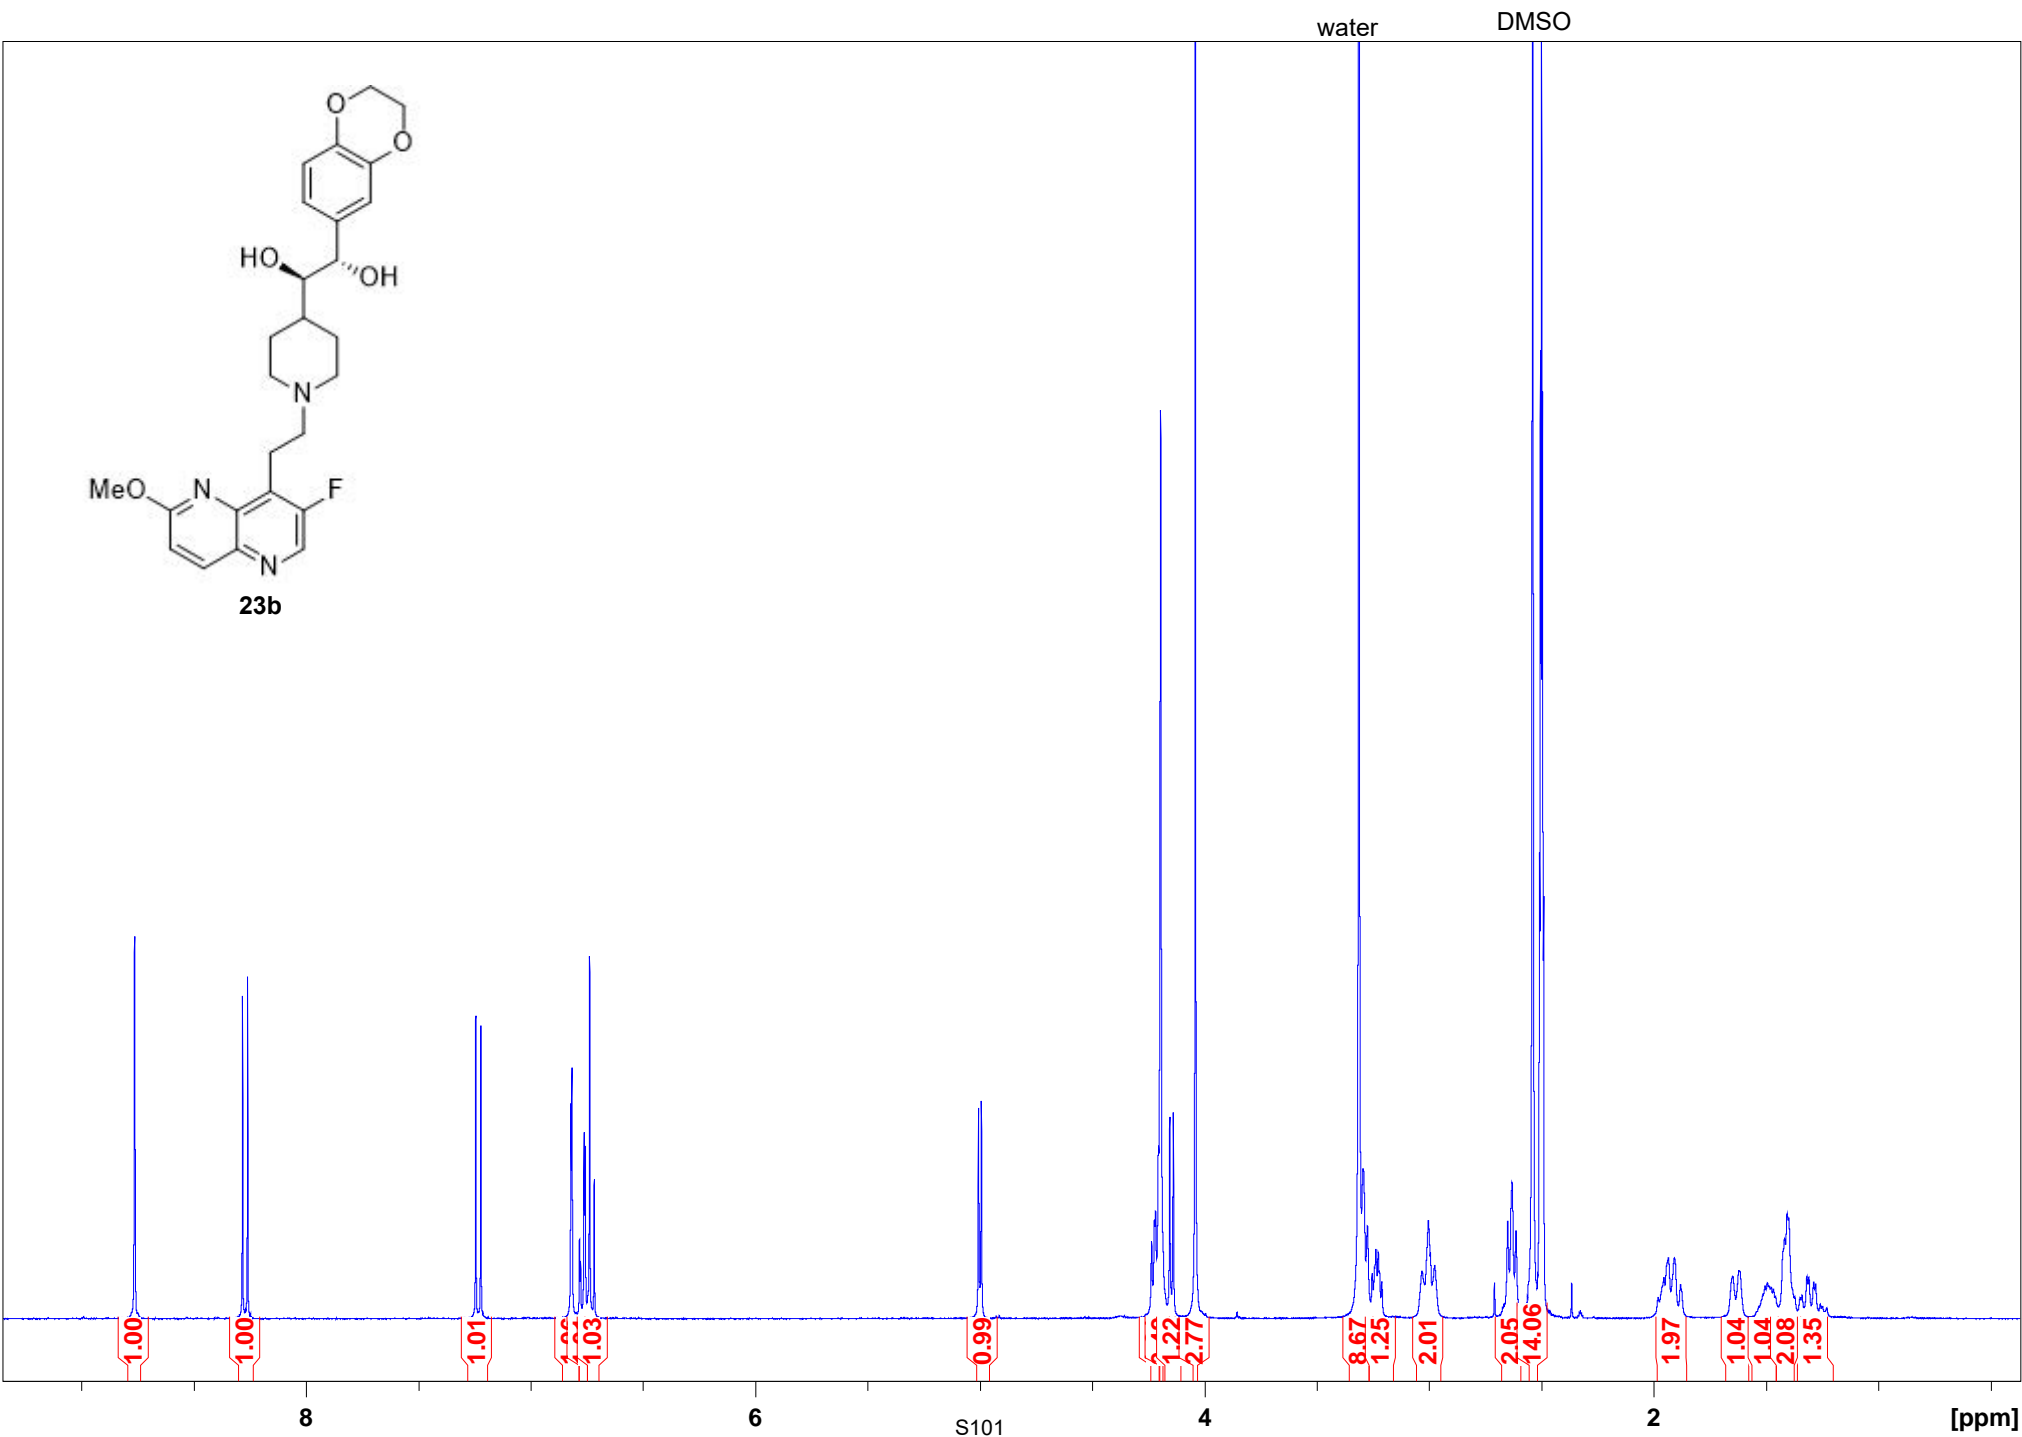

DMSO

- 161.9598  
- 158.0986  
- 155.5746

142.4973  
142.0244  
140.9730  
140.9027  
140.4094  
138.0875  
138.0690  
137.9992  
137.7220  
137.4825  
130.2695  
130.1406

- 120.2633  
- 116.0824  
- 115.8112  
- 115.2590

- 77.1143  
- 72.9408

- 63.9976

- 56.9524  
- 53.5456  
- 53.4572  
- 53.2685

- 37.2727

- 29.0943  
- 25.3600

- 20.7198

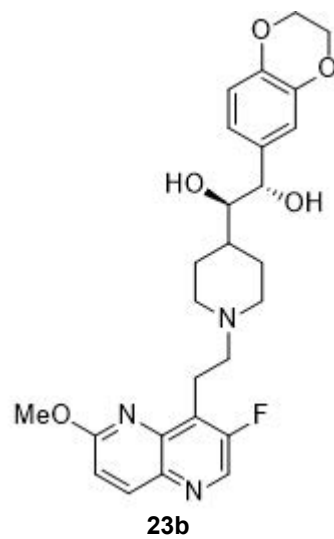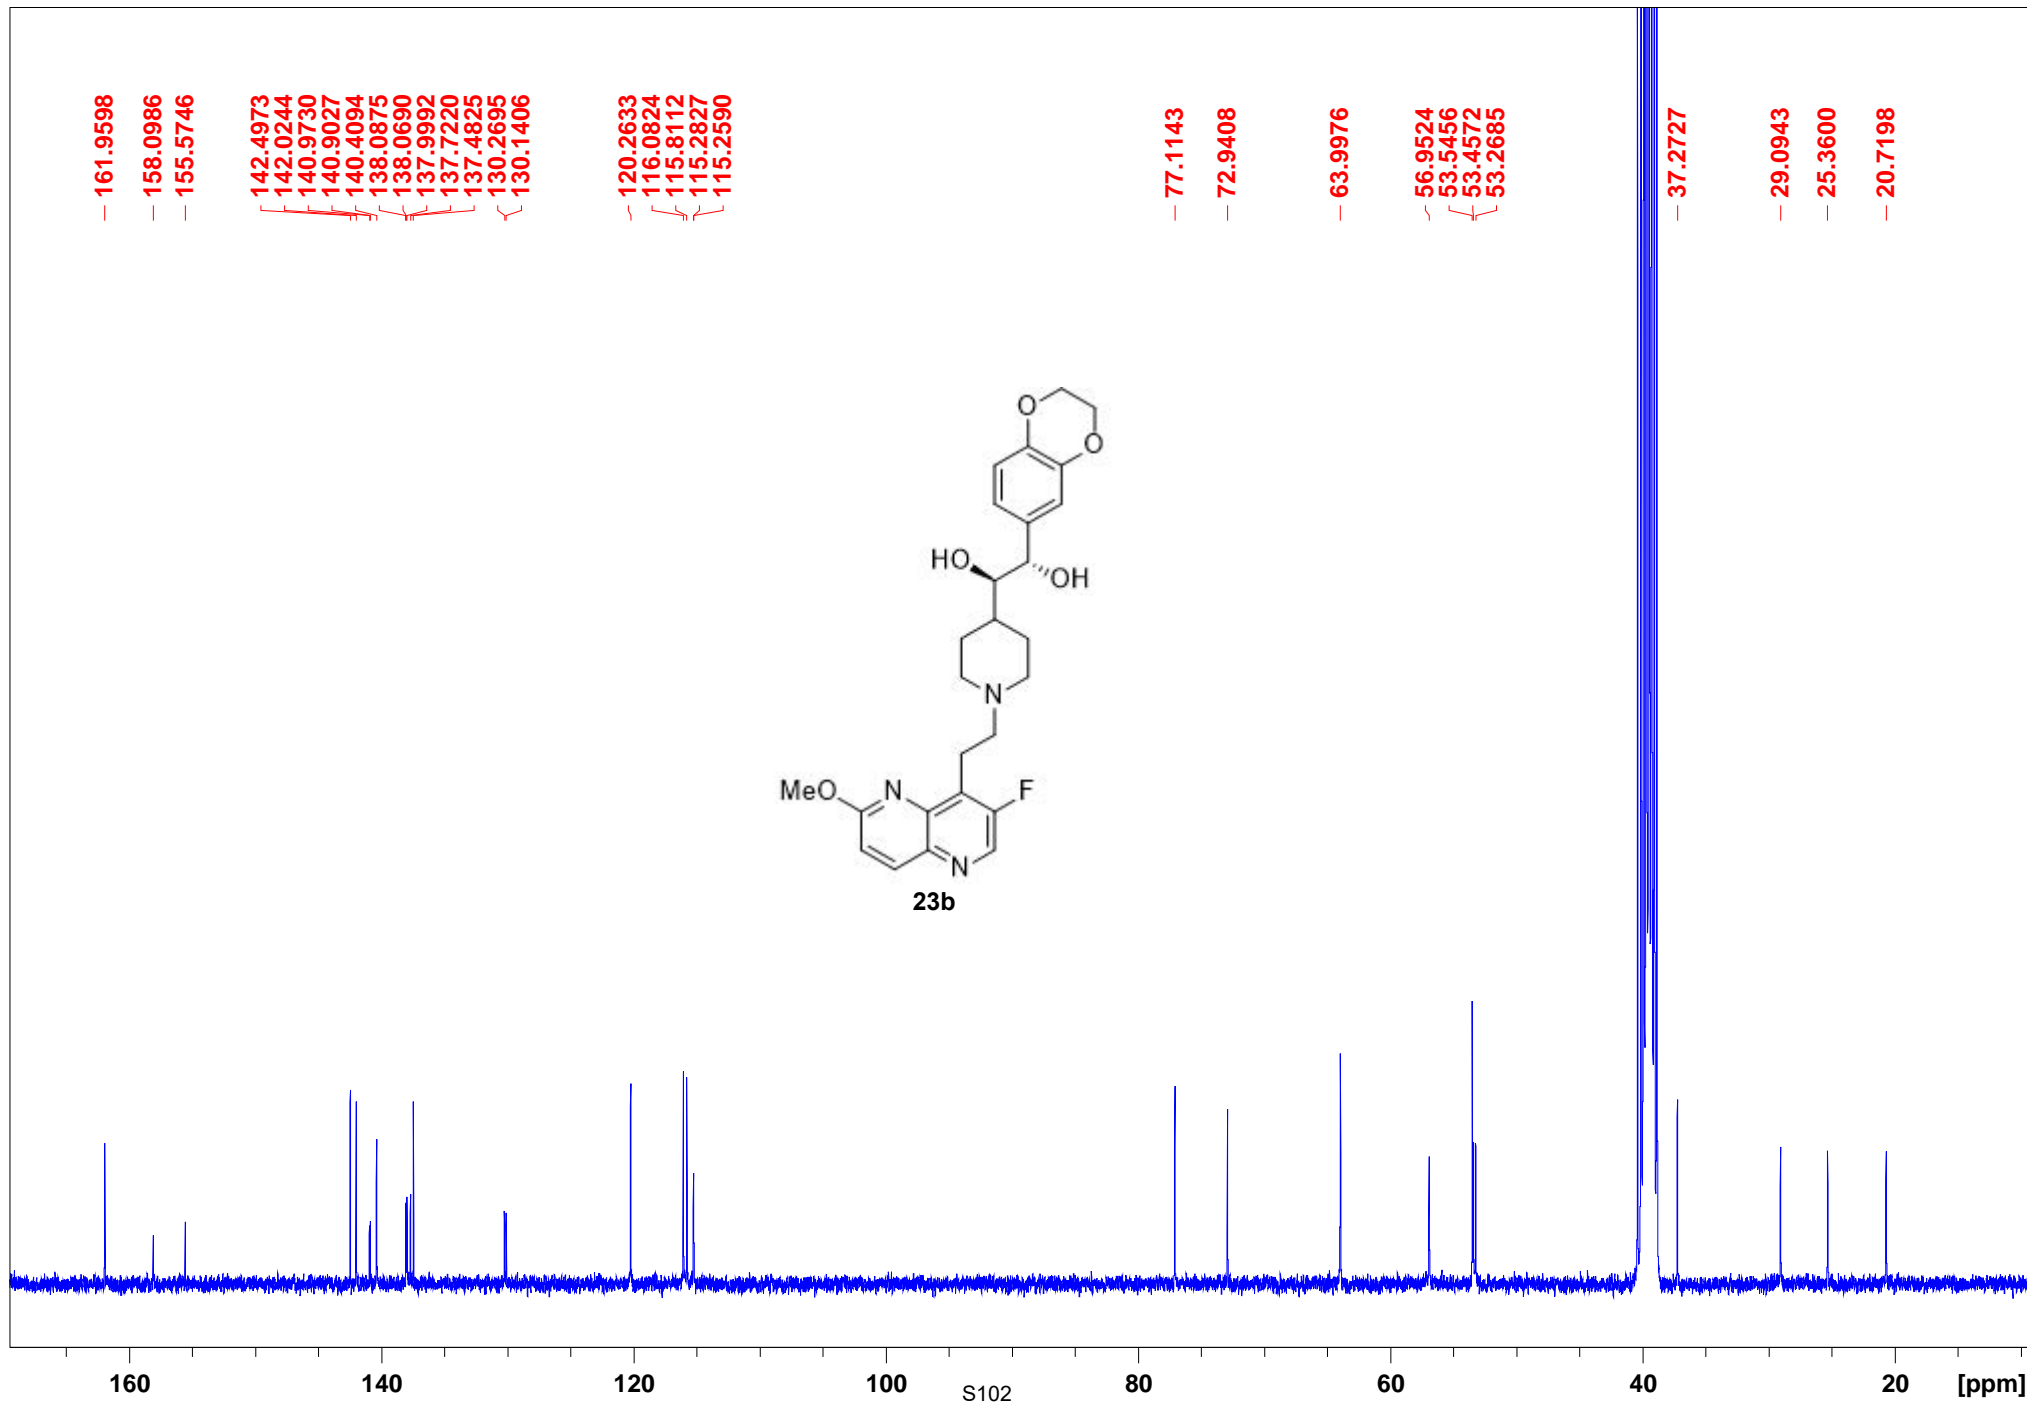

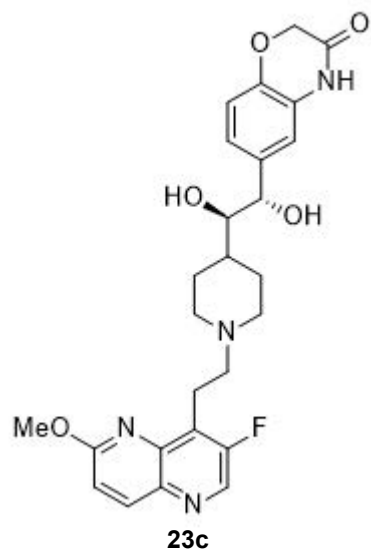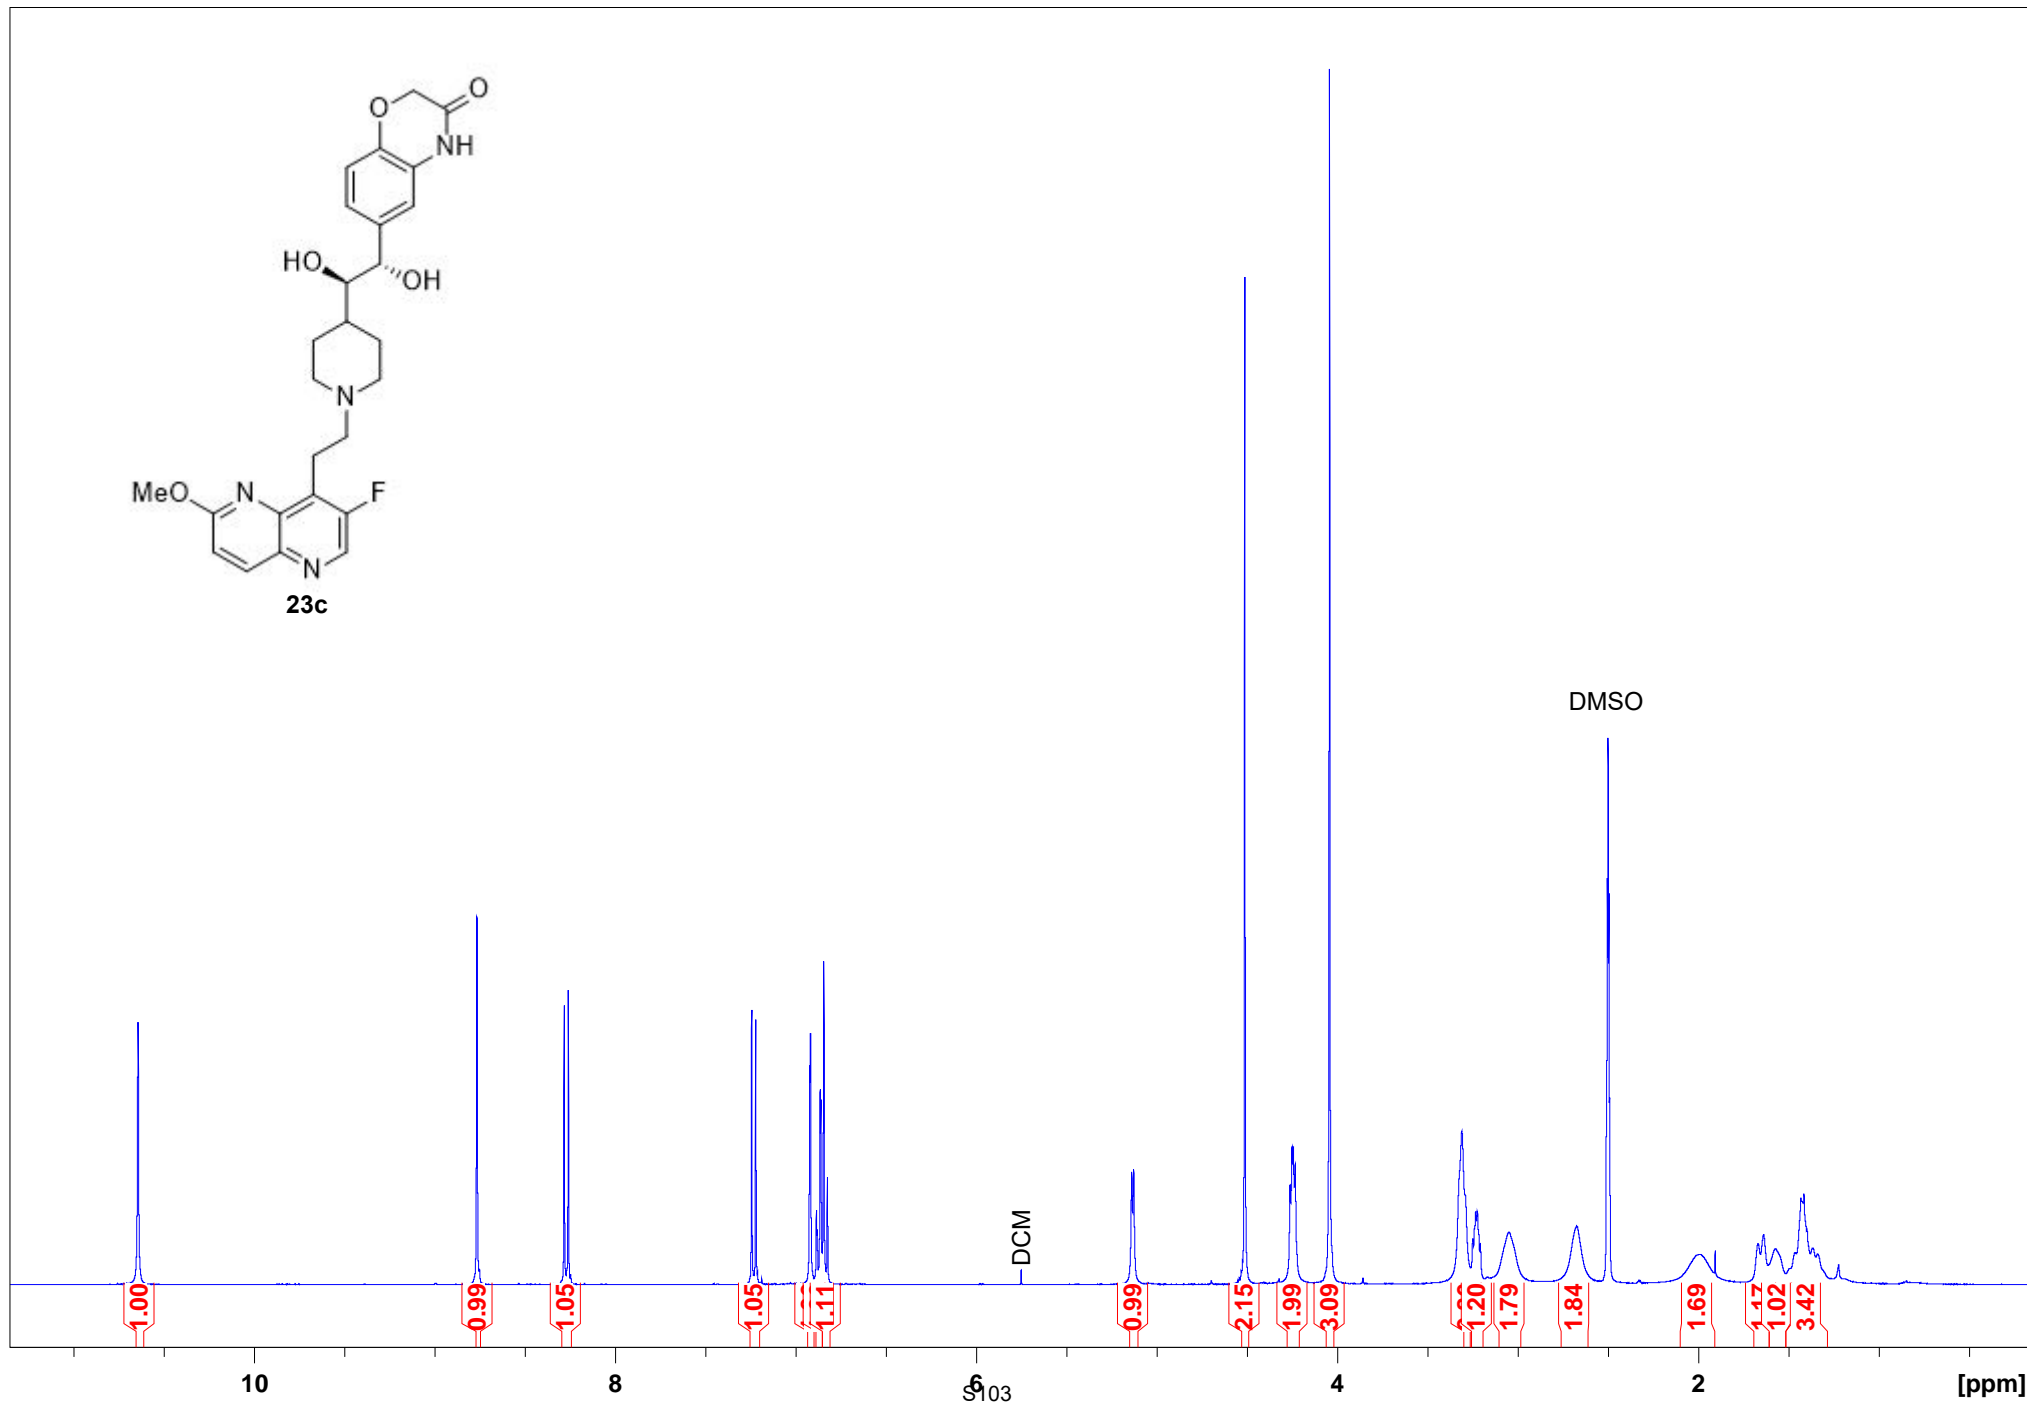

DMSO

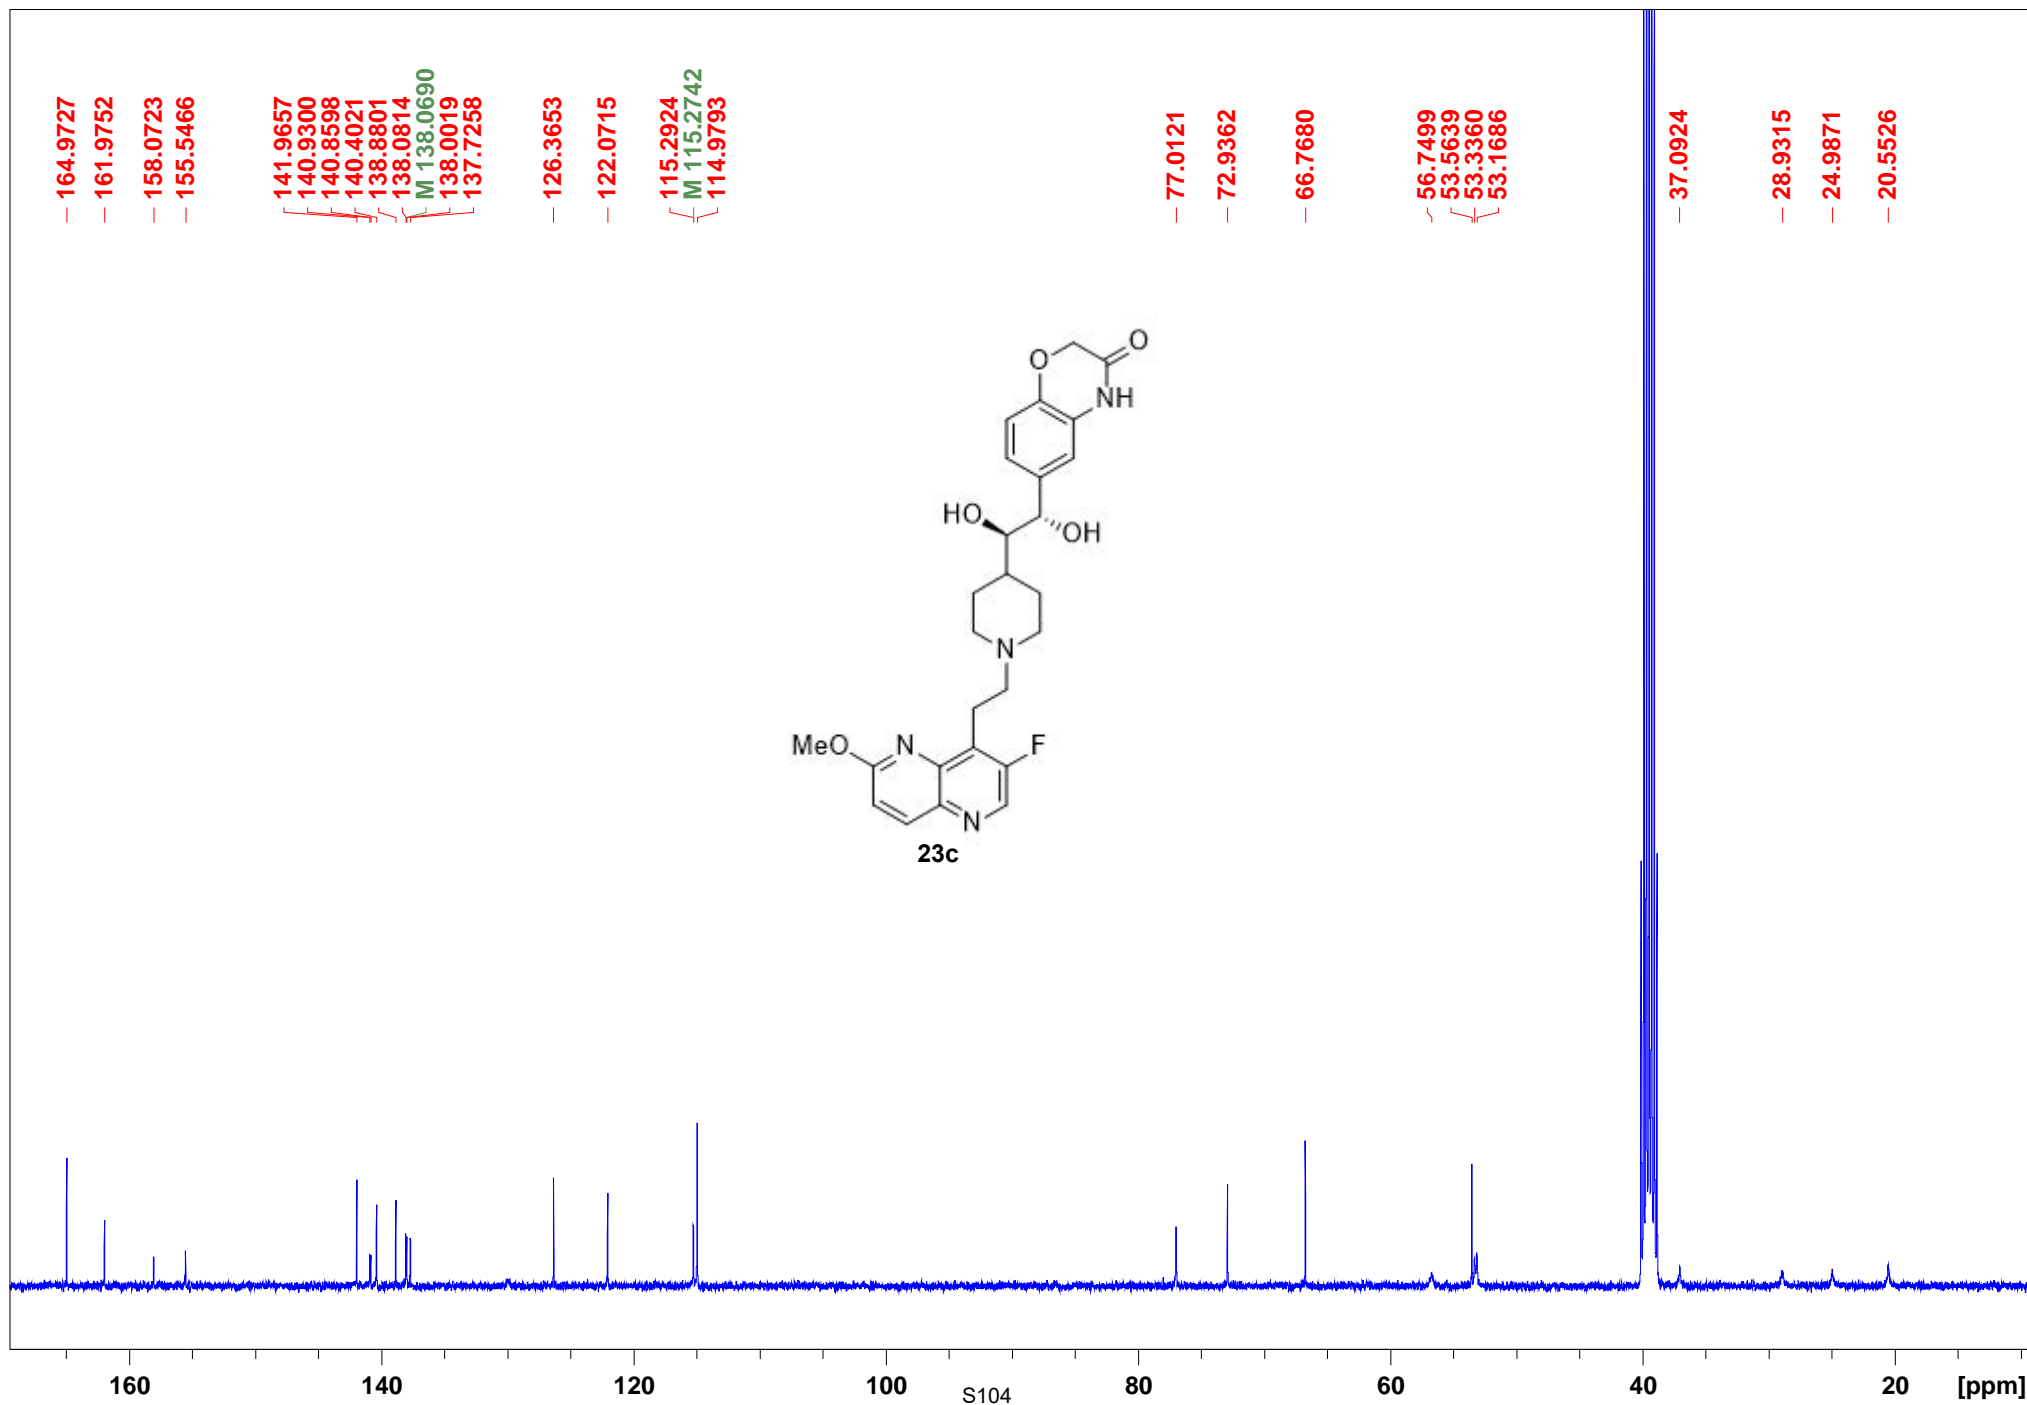



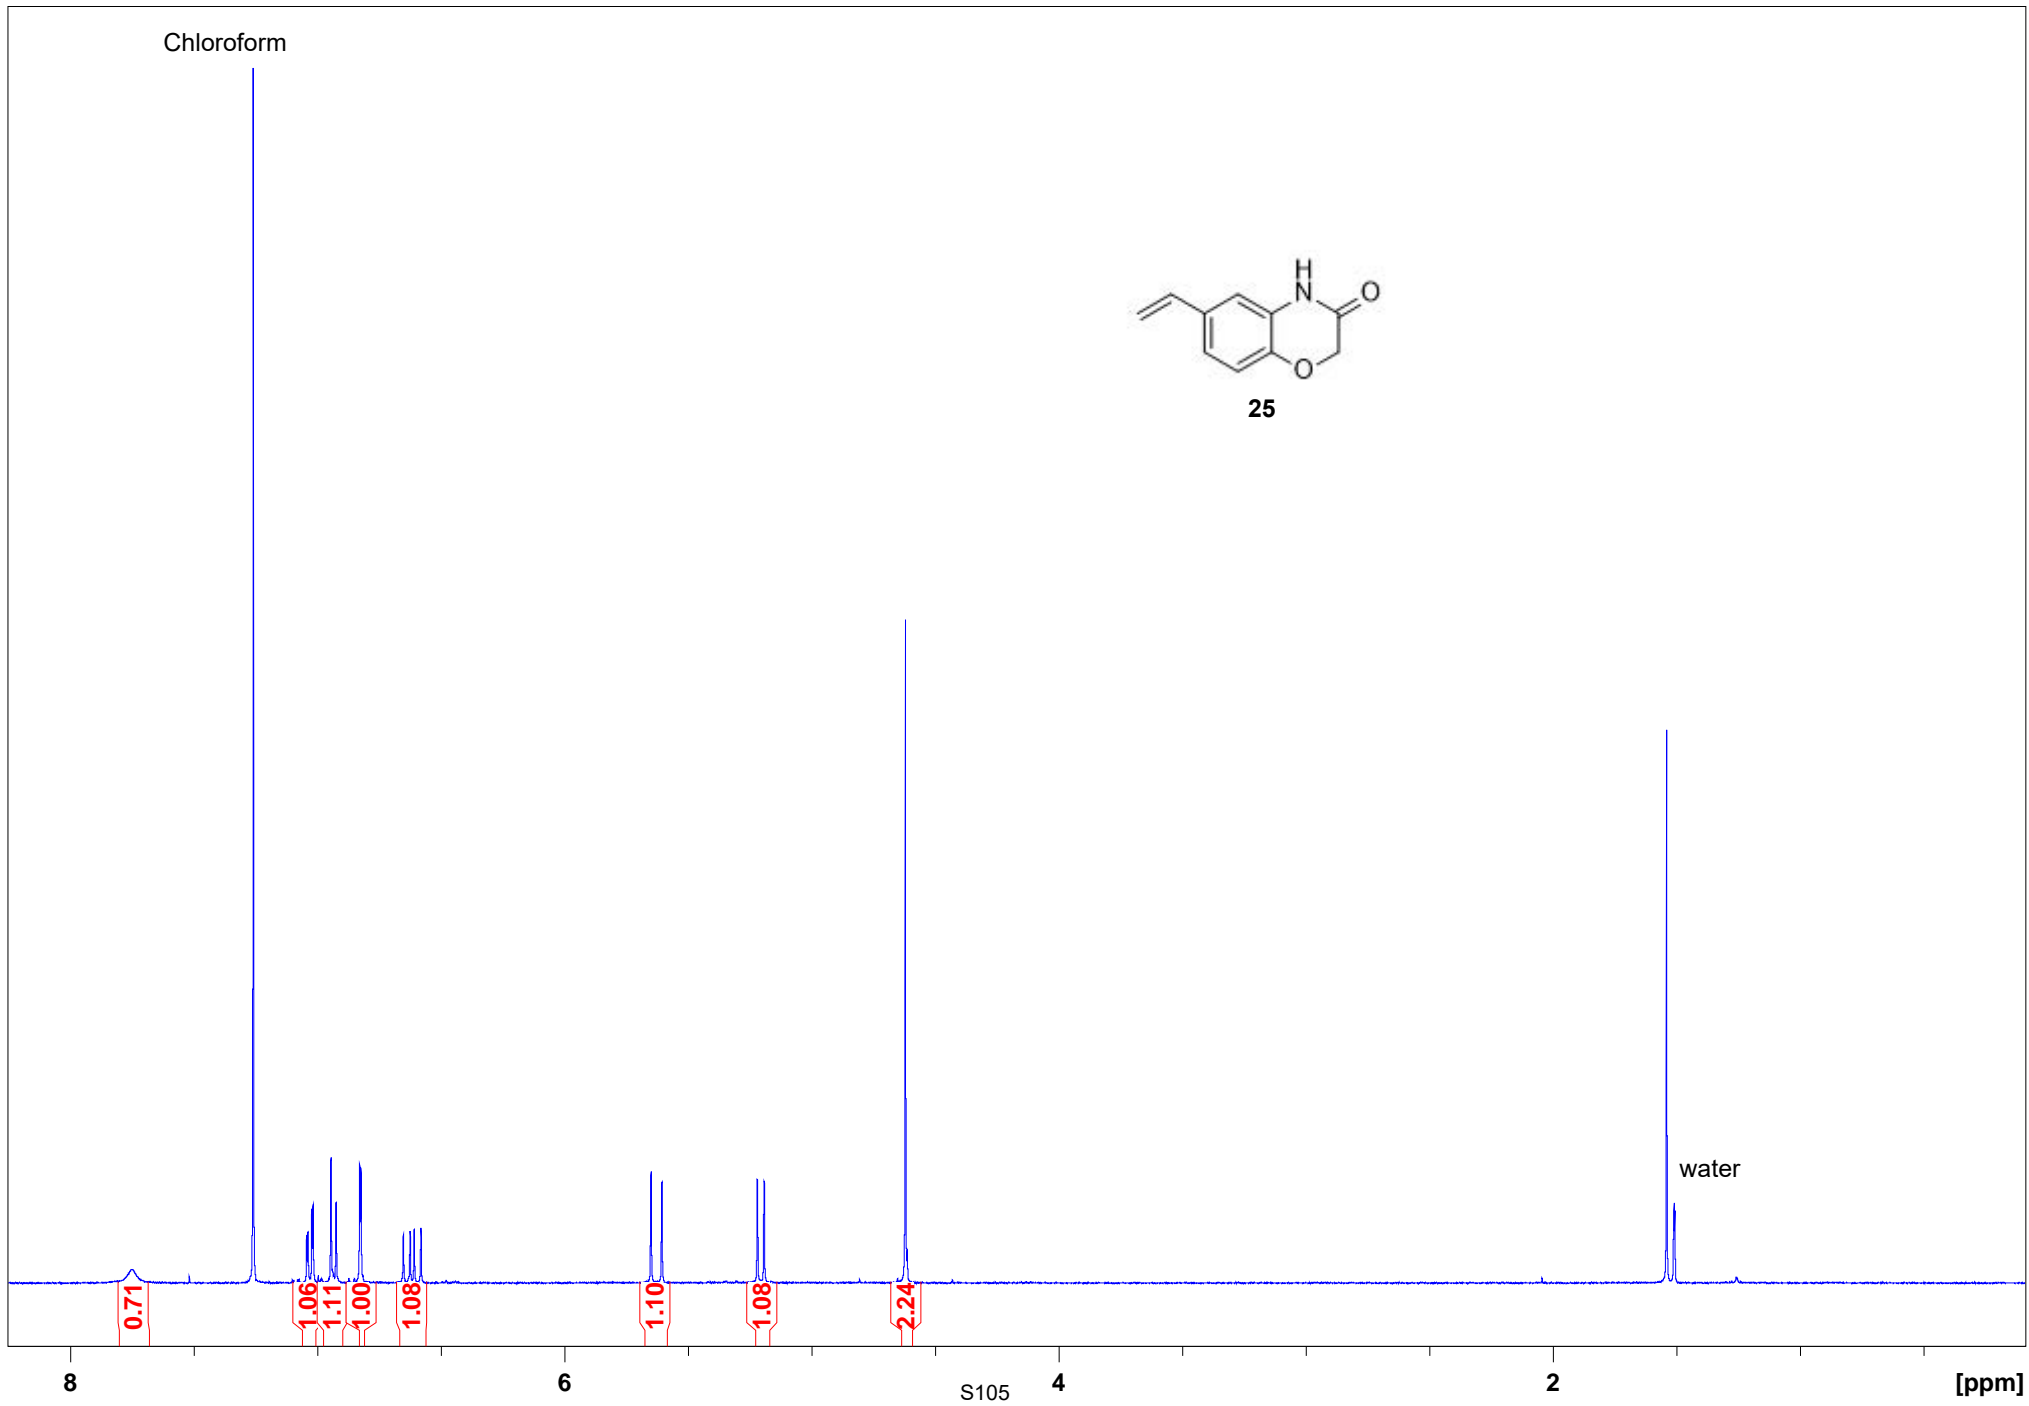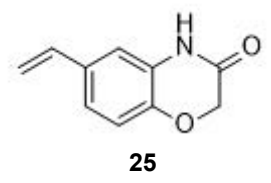

Chloroform

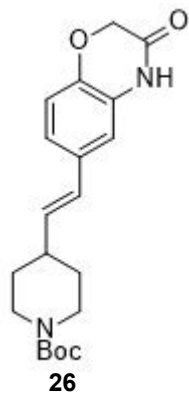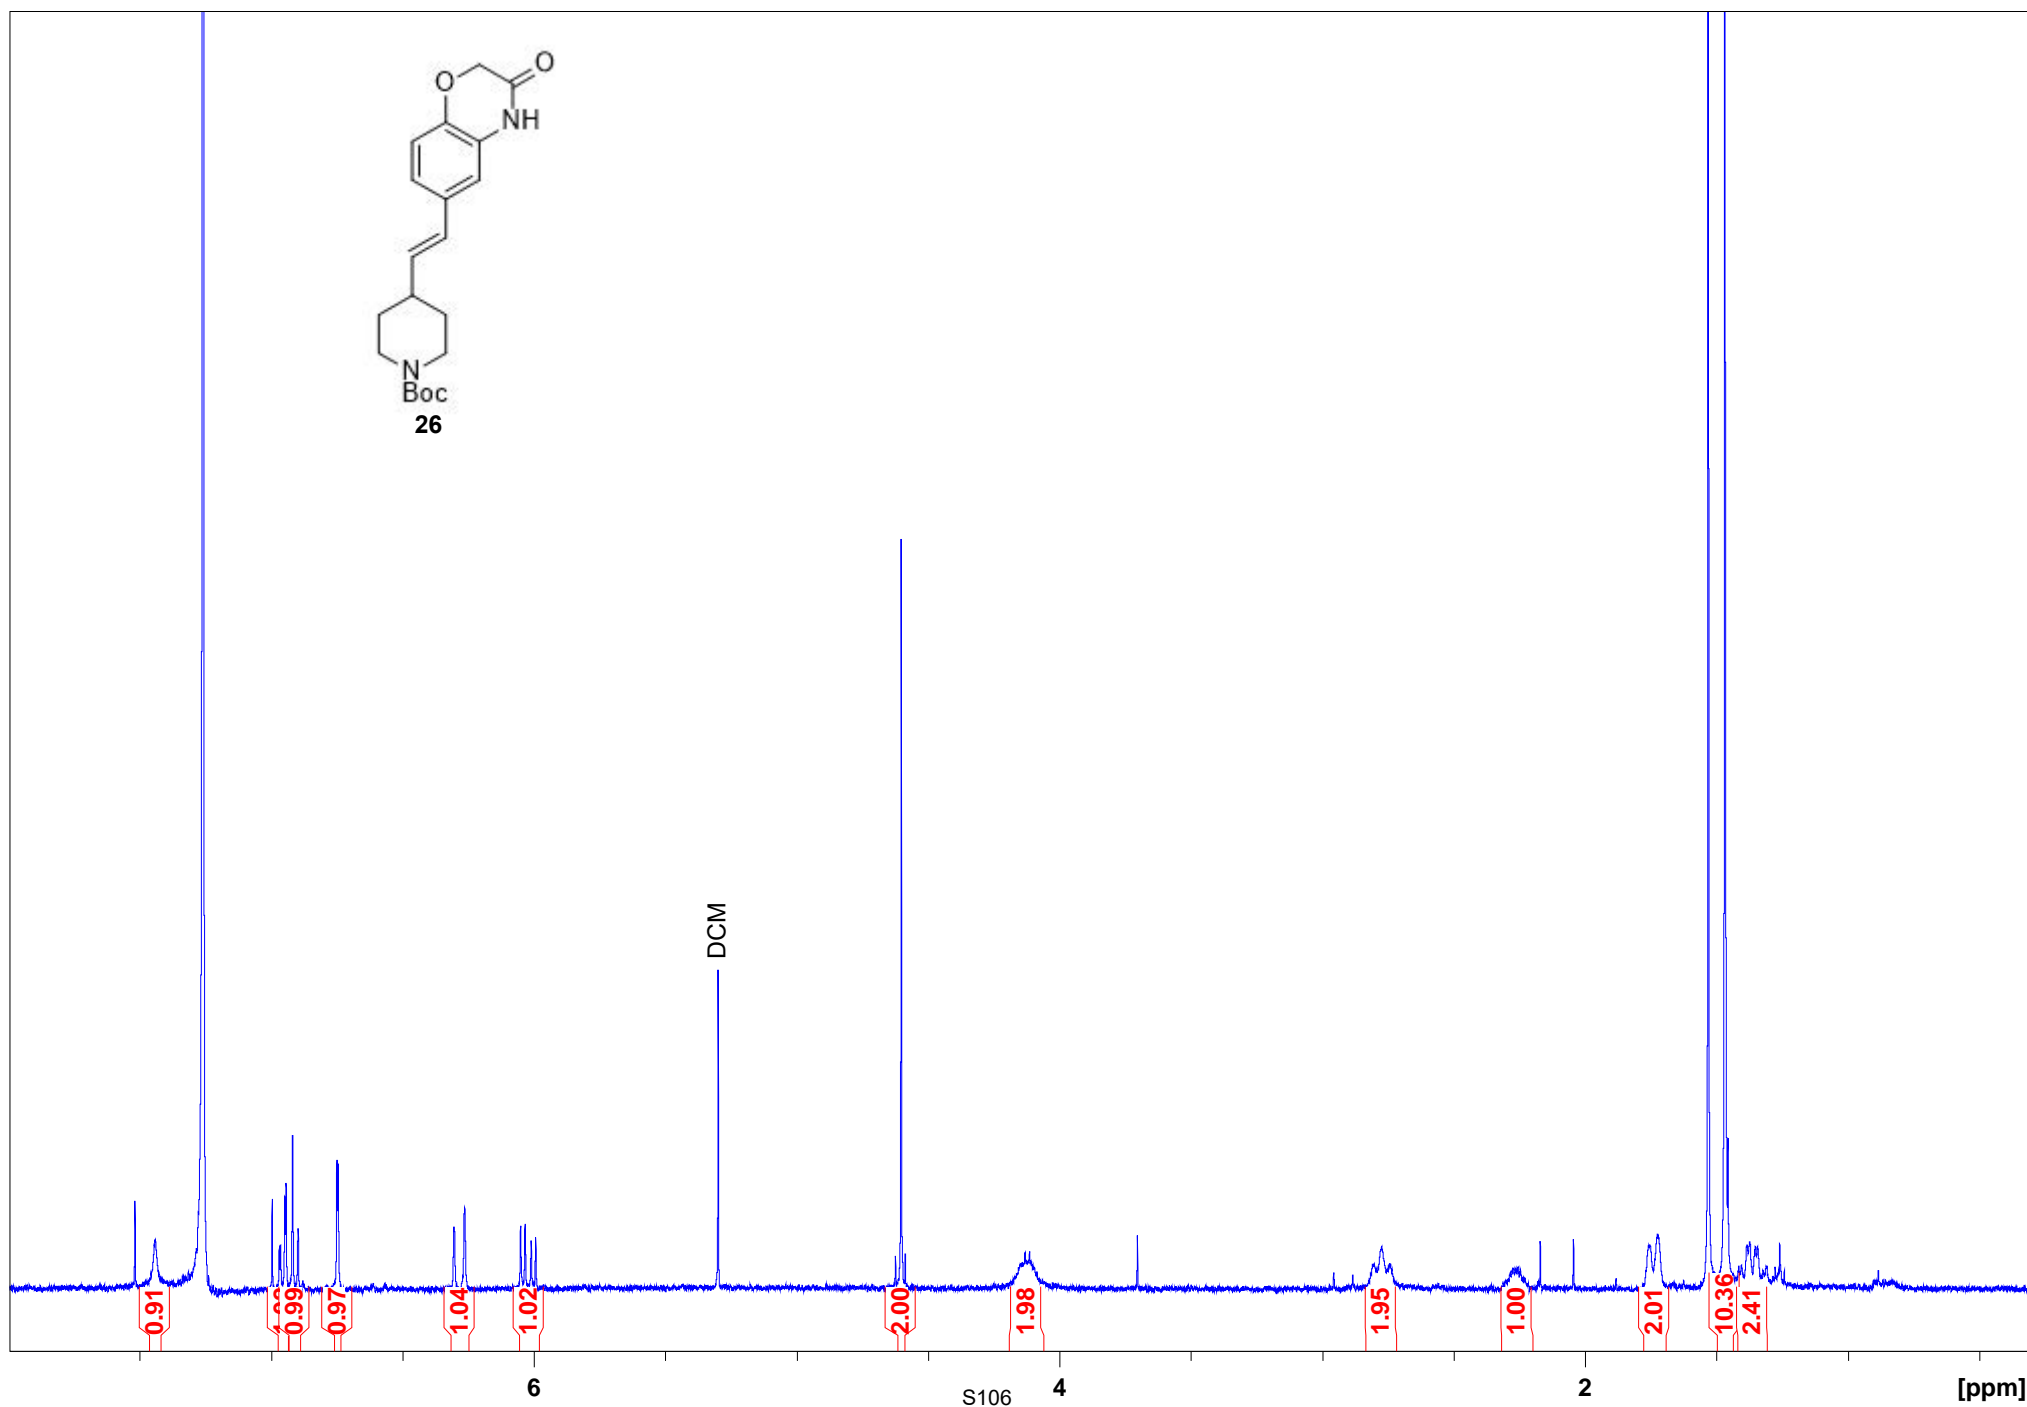

Chloroform

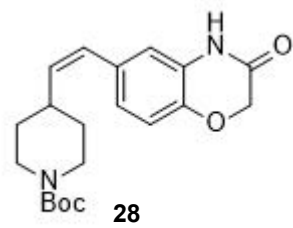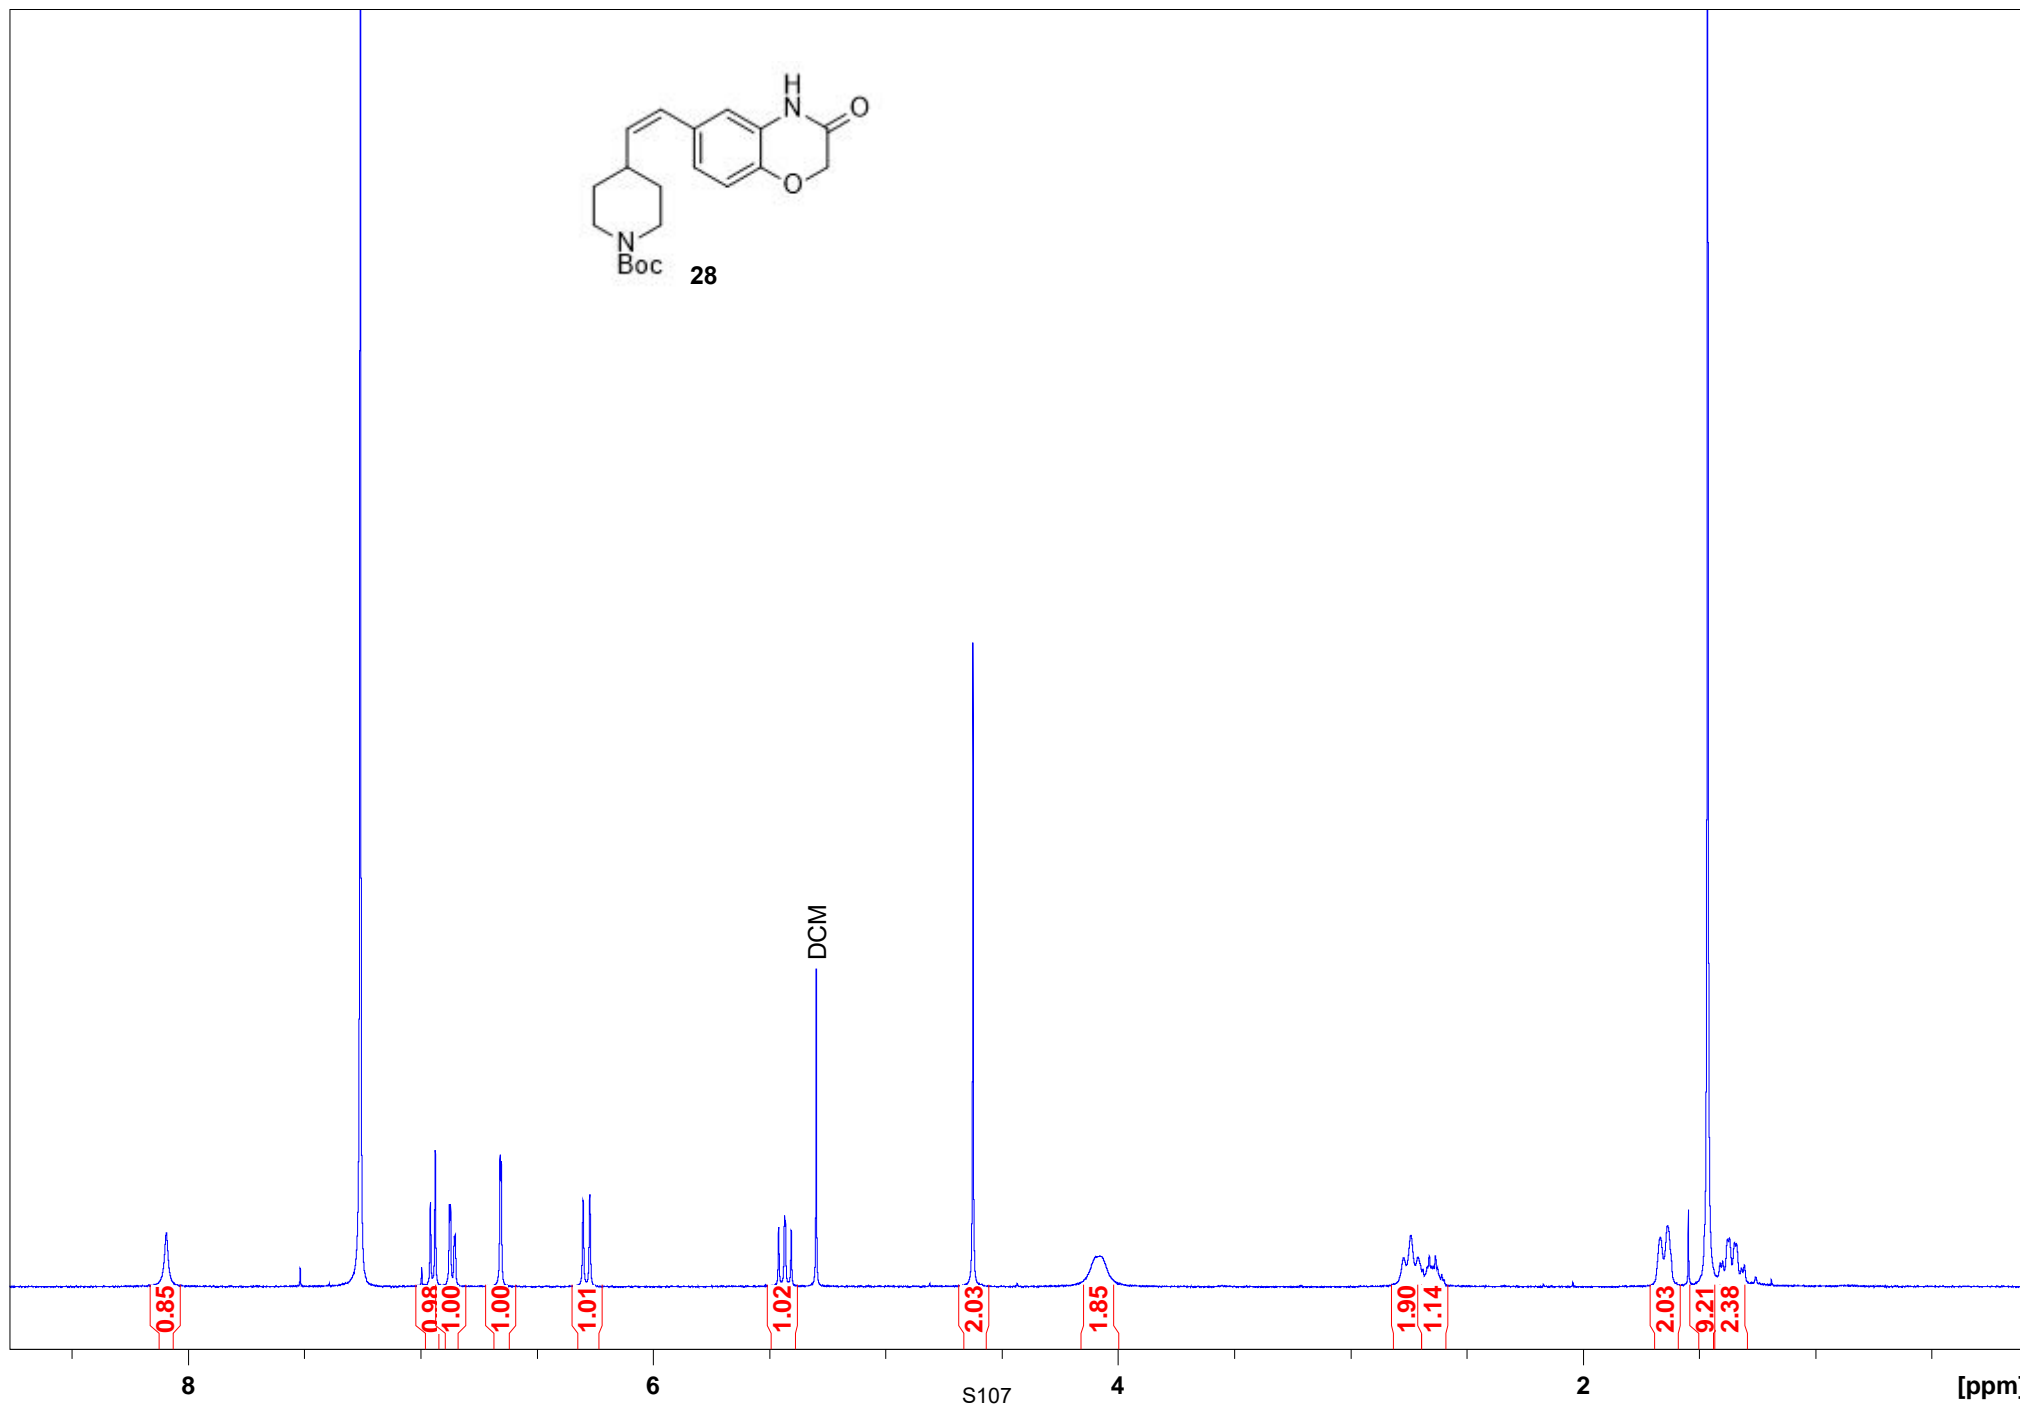

Chloroform

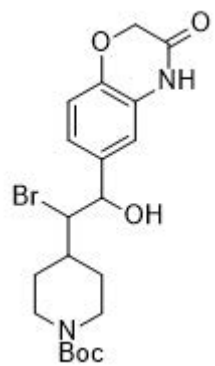

30

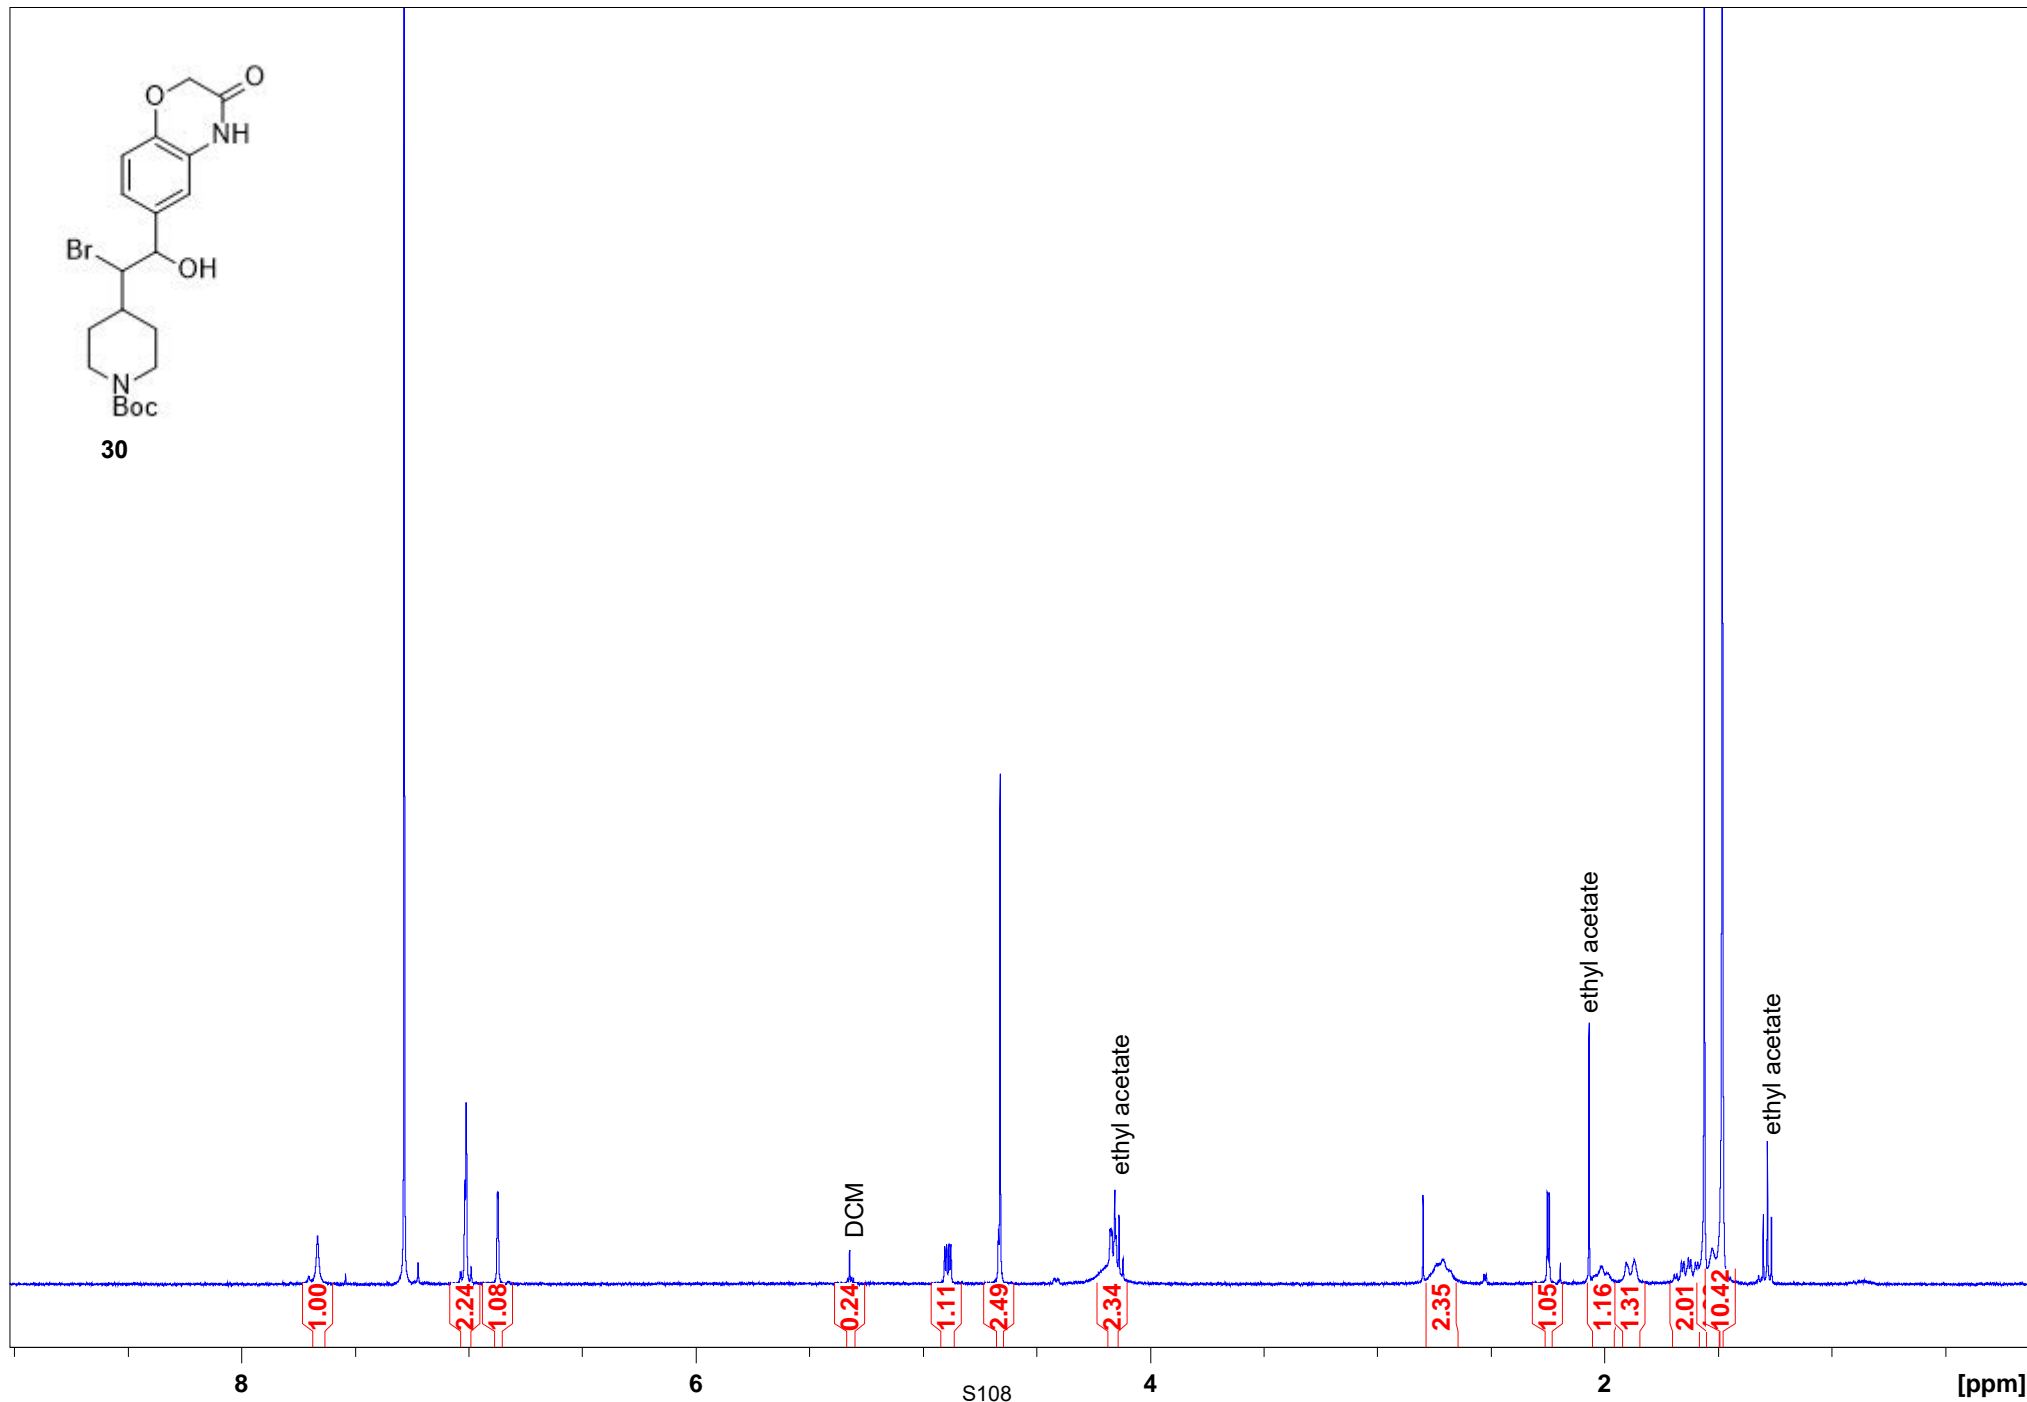

Chloroform

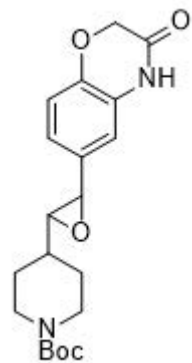

31

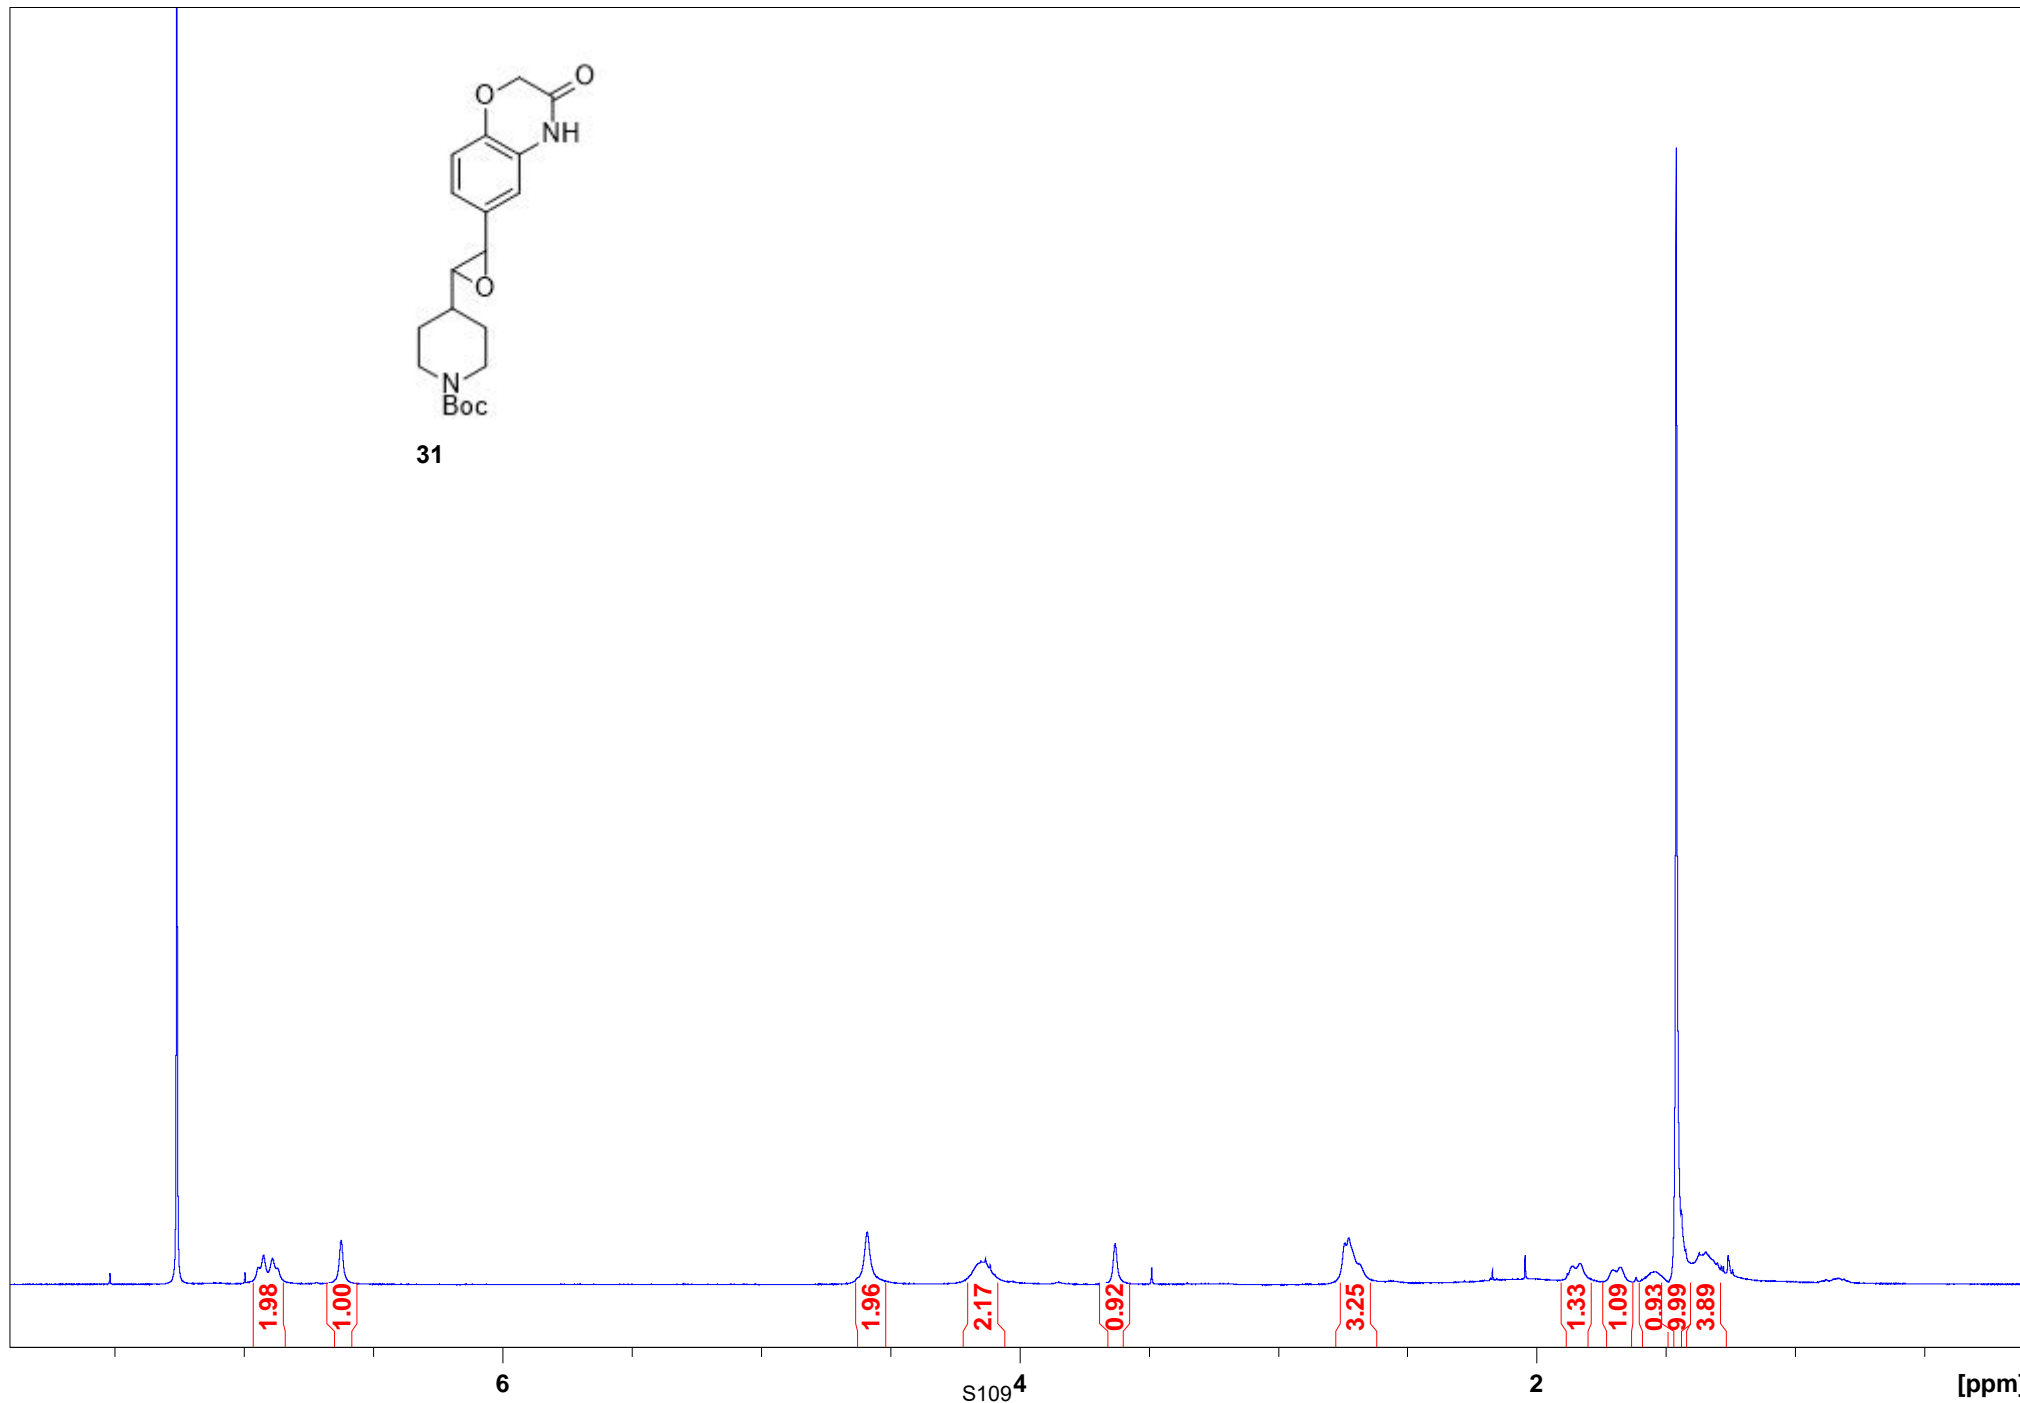

Chloroform

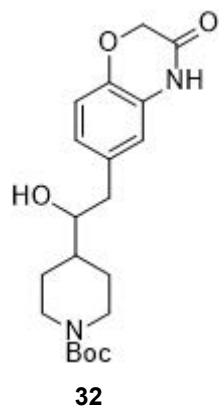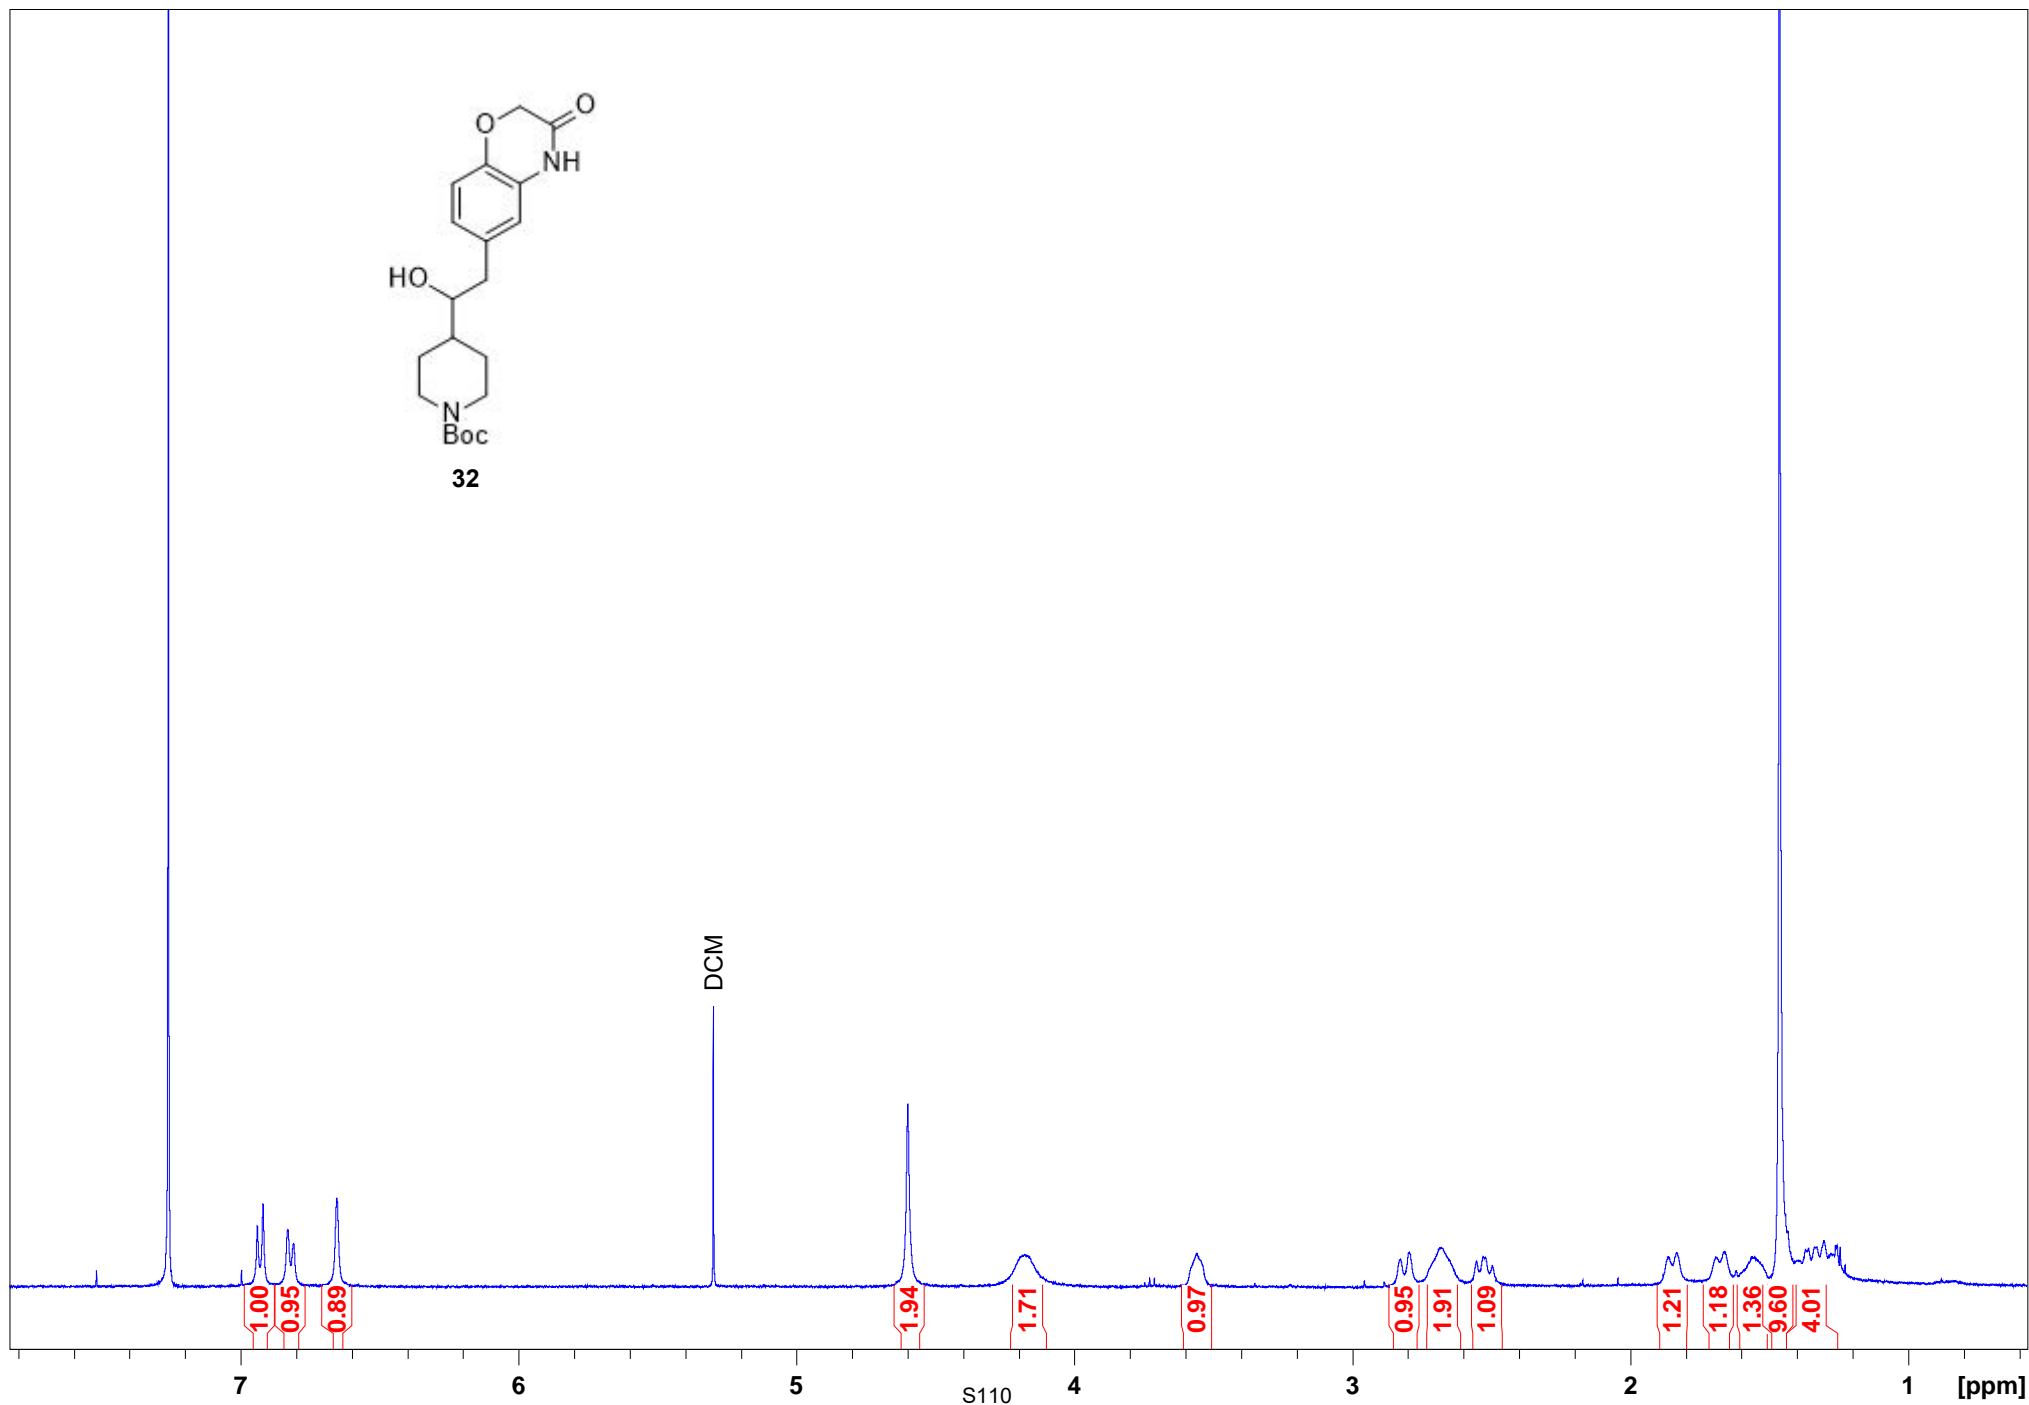

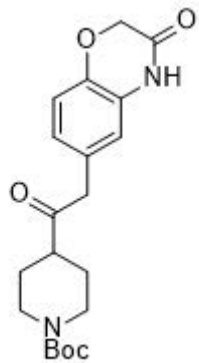

34

Chloroform

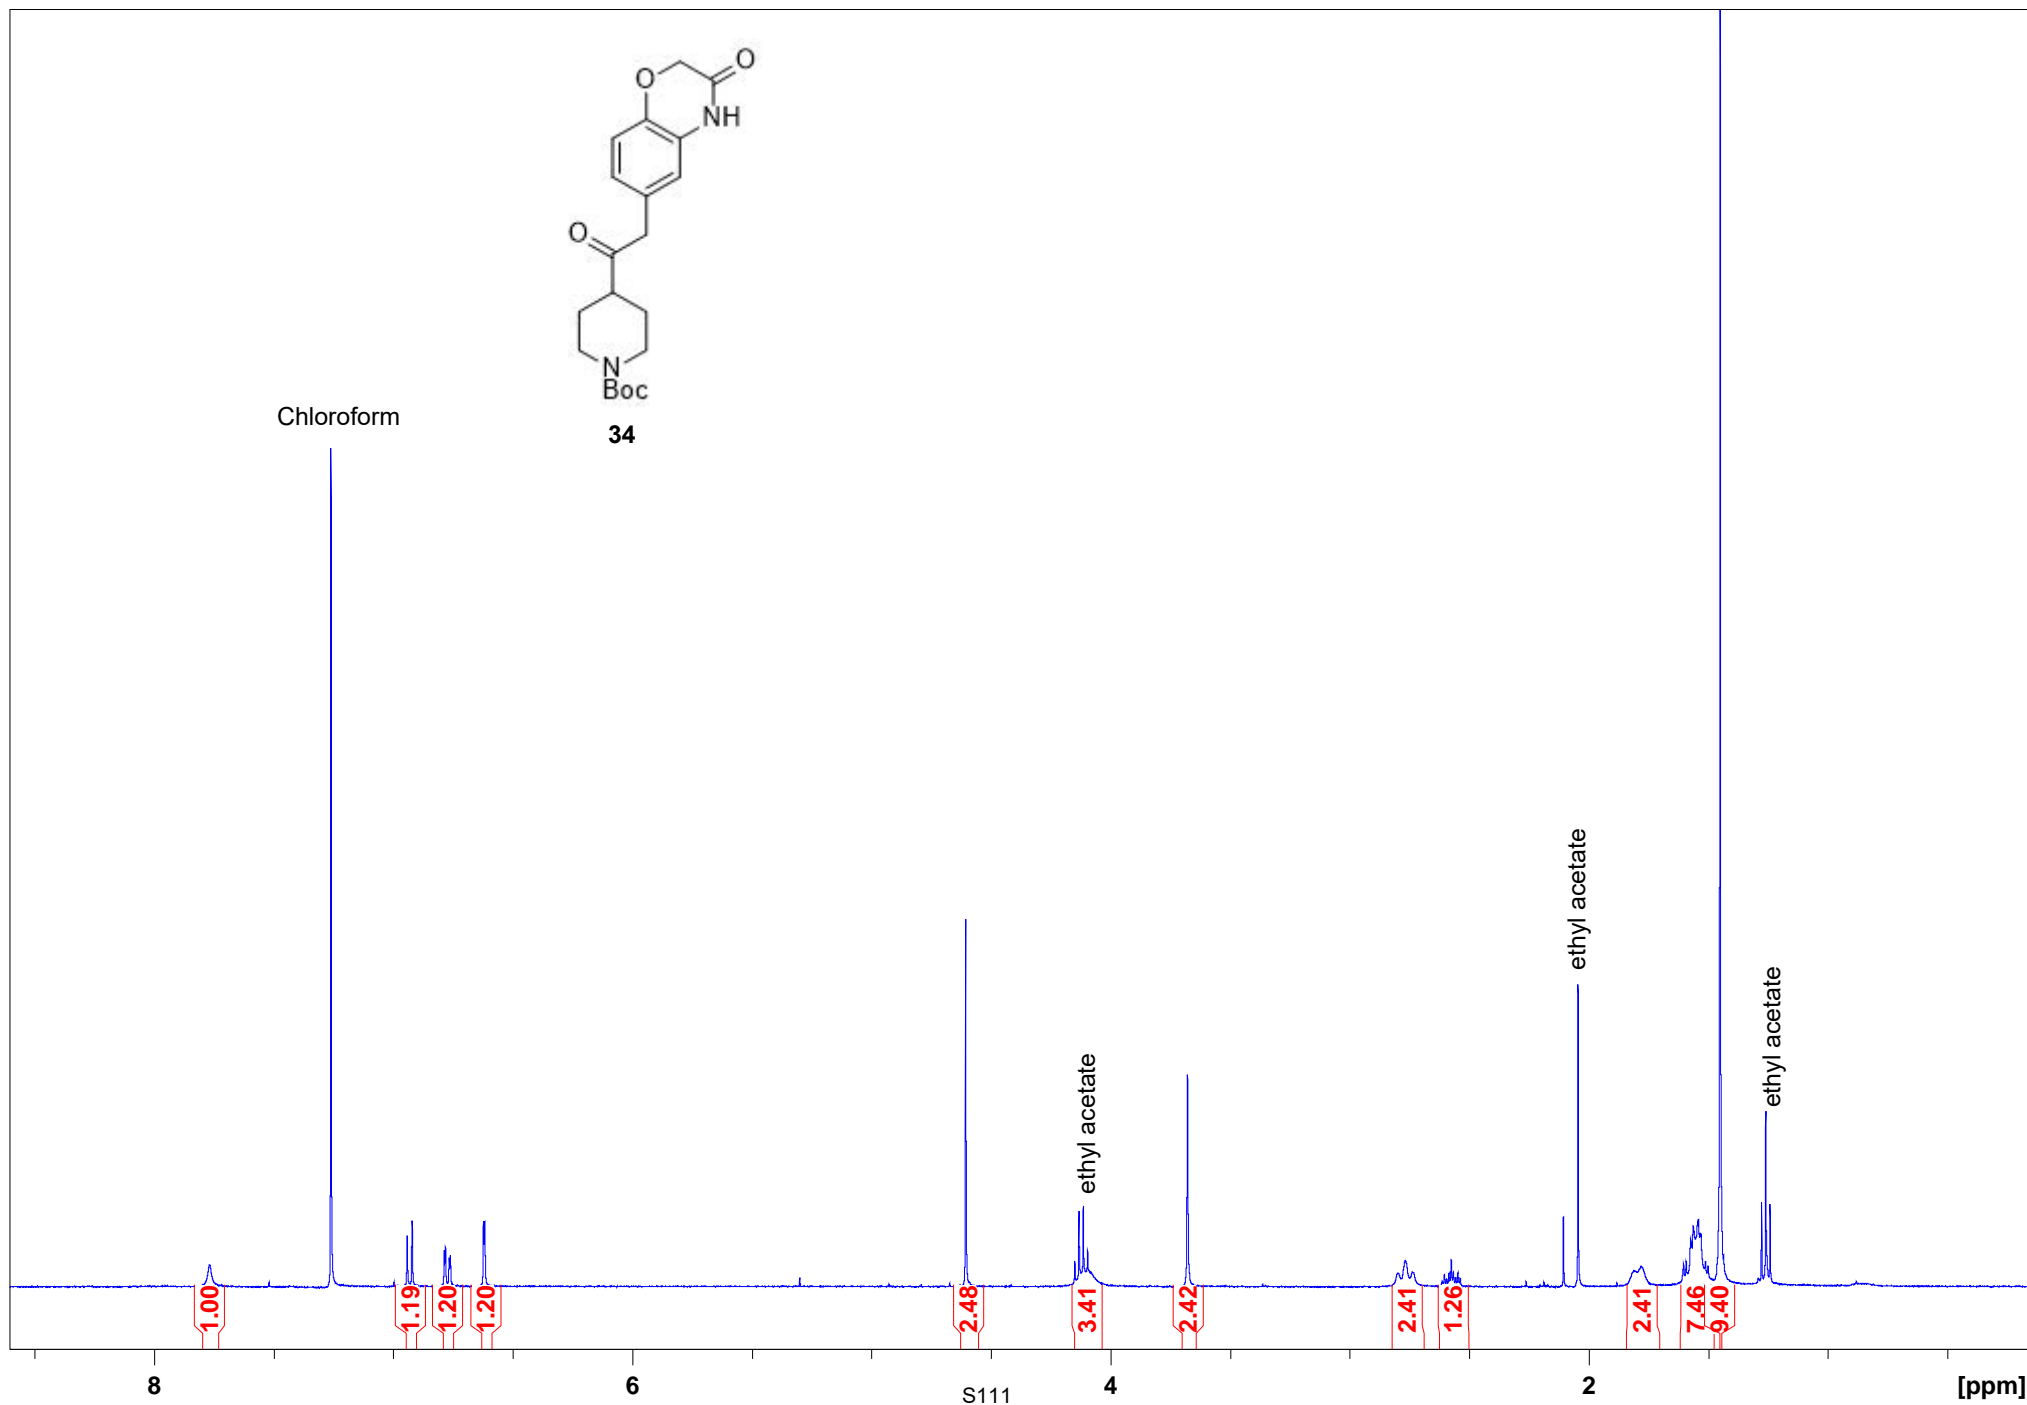

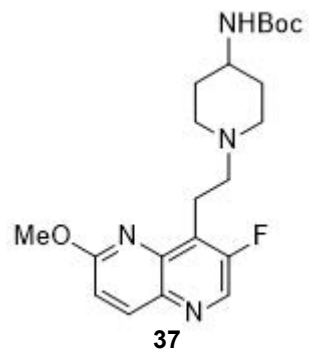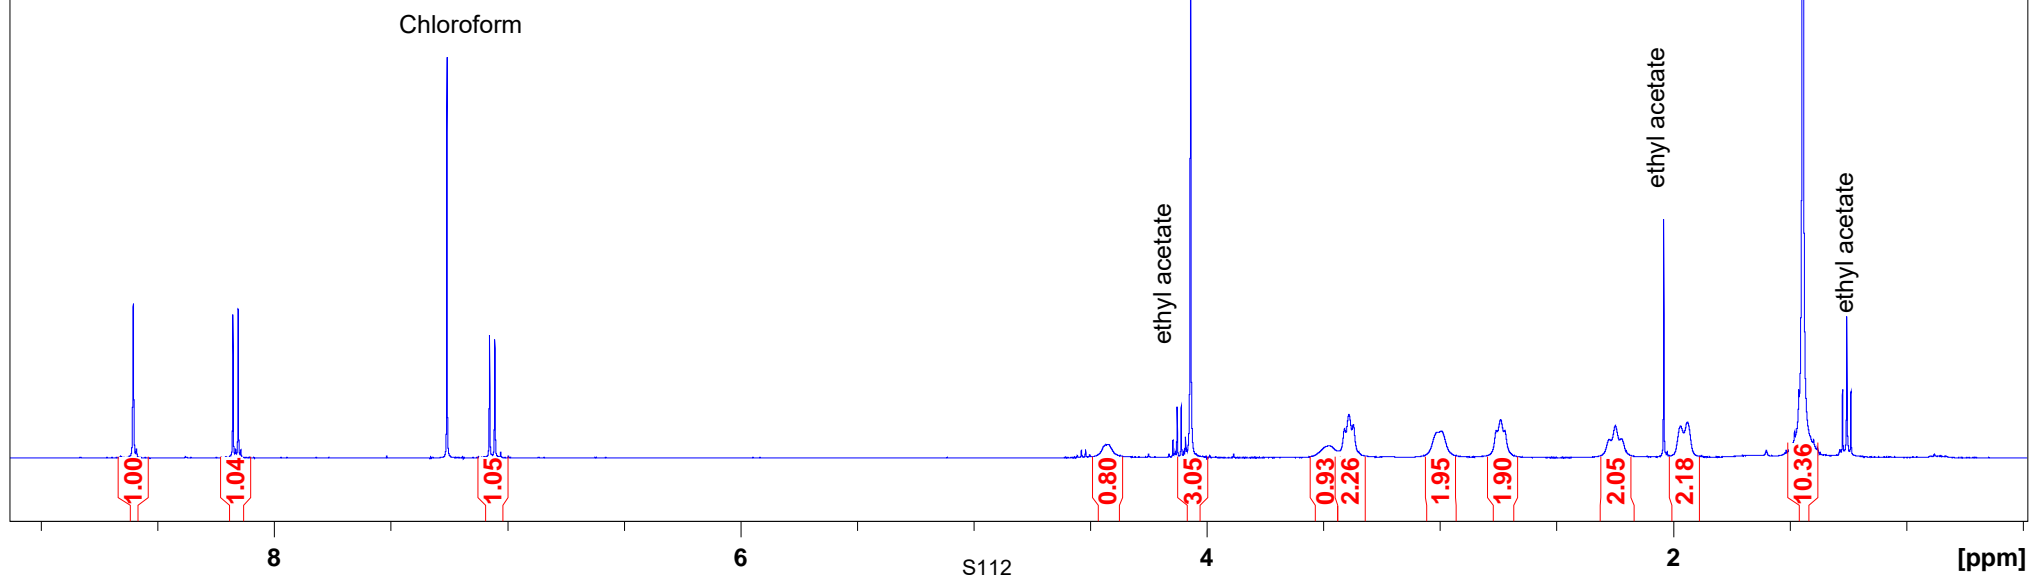



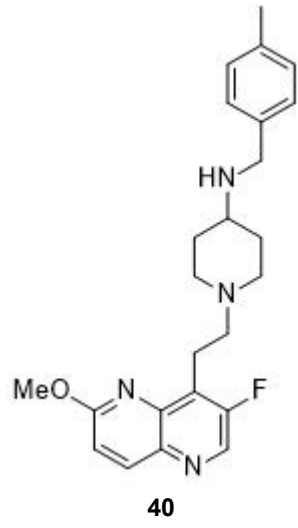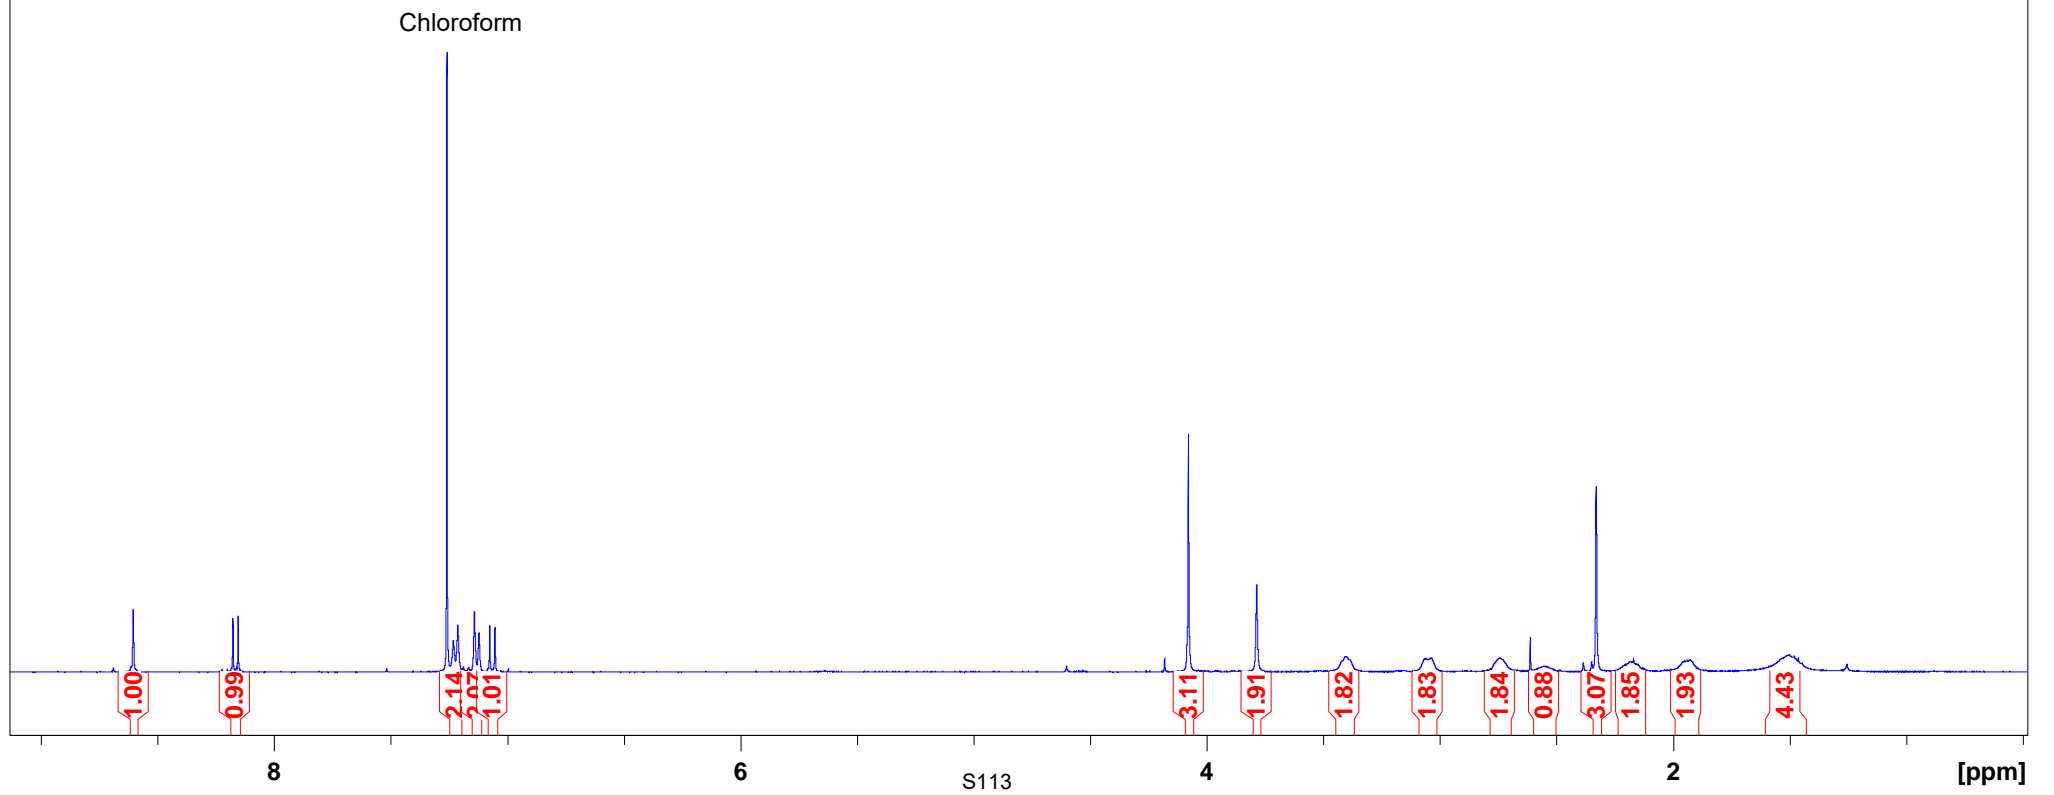

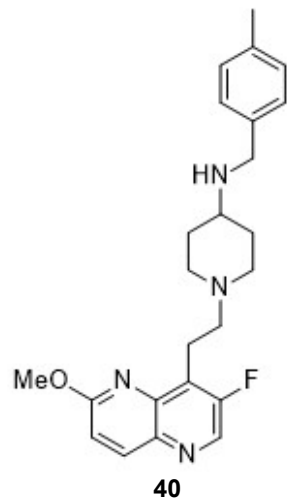

Chloroform

162.4972  
158.6729  
156.1370  
141.8101  
141.7399  
140.2527  
138.6191  
138.5990  
138.1552  
137.8752  
137.7514  
136.5711  
130.8227  
130.6937  
129.2198  
128.1302  
115.3018  
115.2746

57.2391  
54.1228  
53.9181  
52.2967  
50.5986

32.8657

21.2033

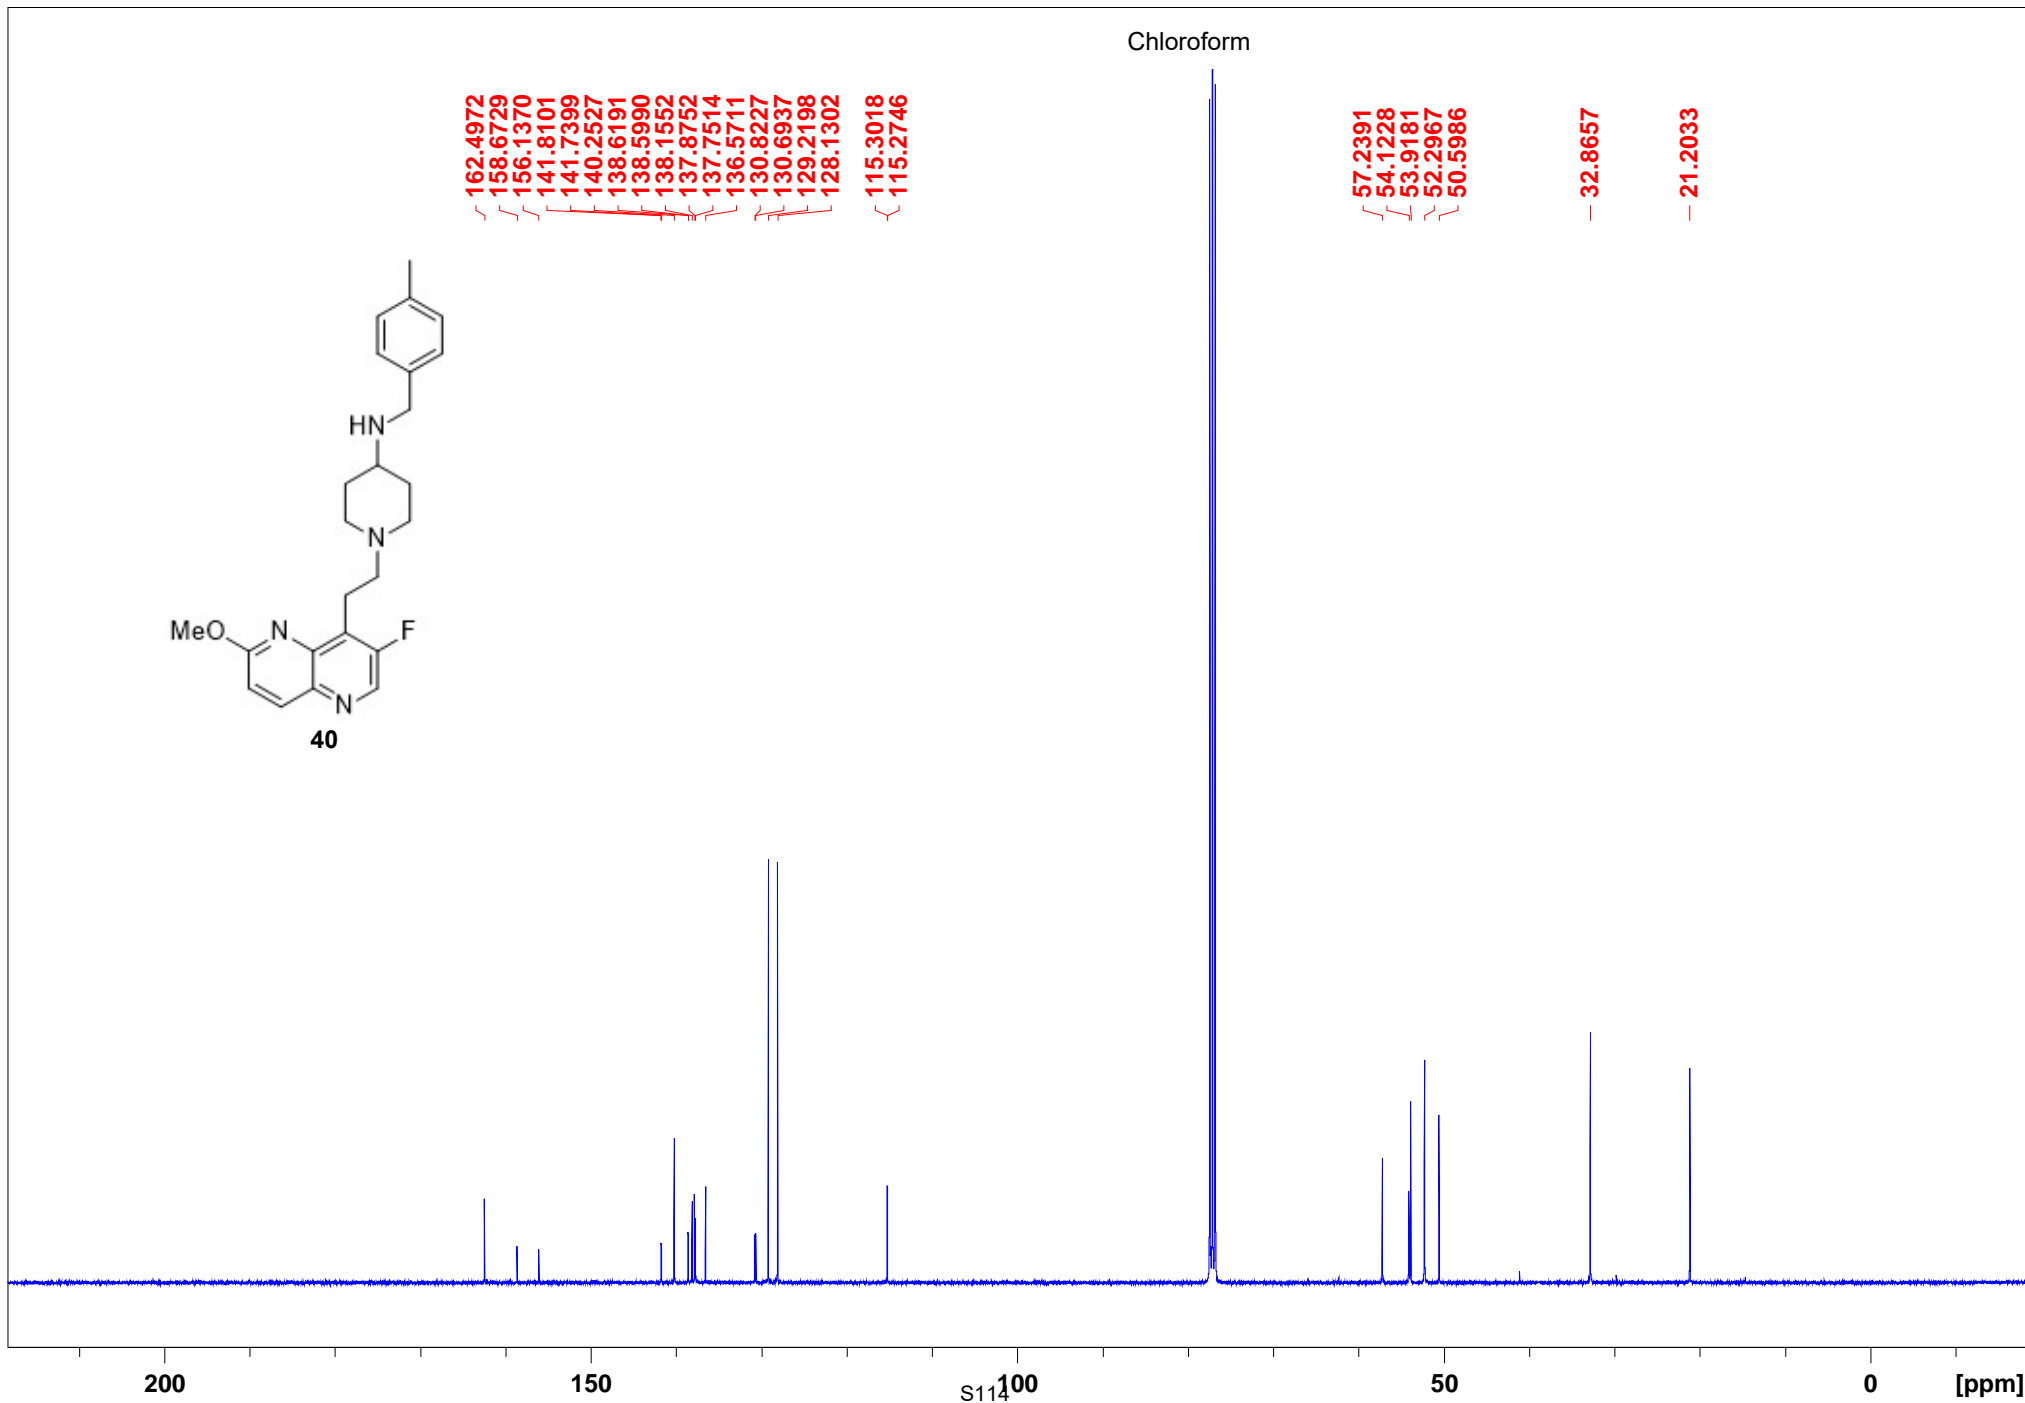

Chloroform

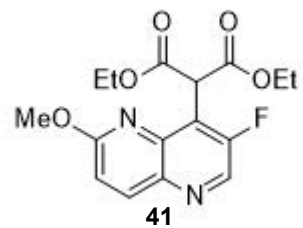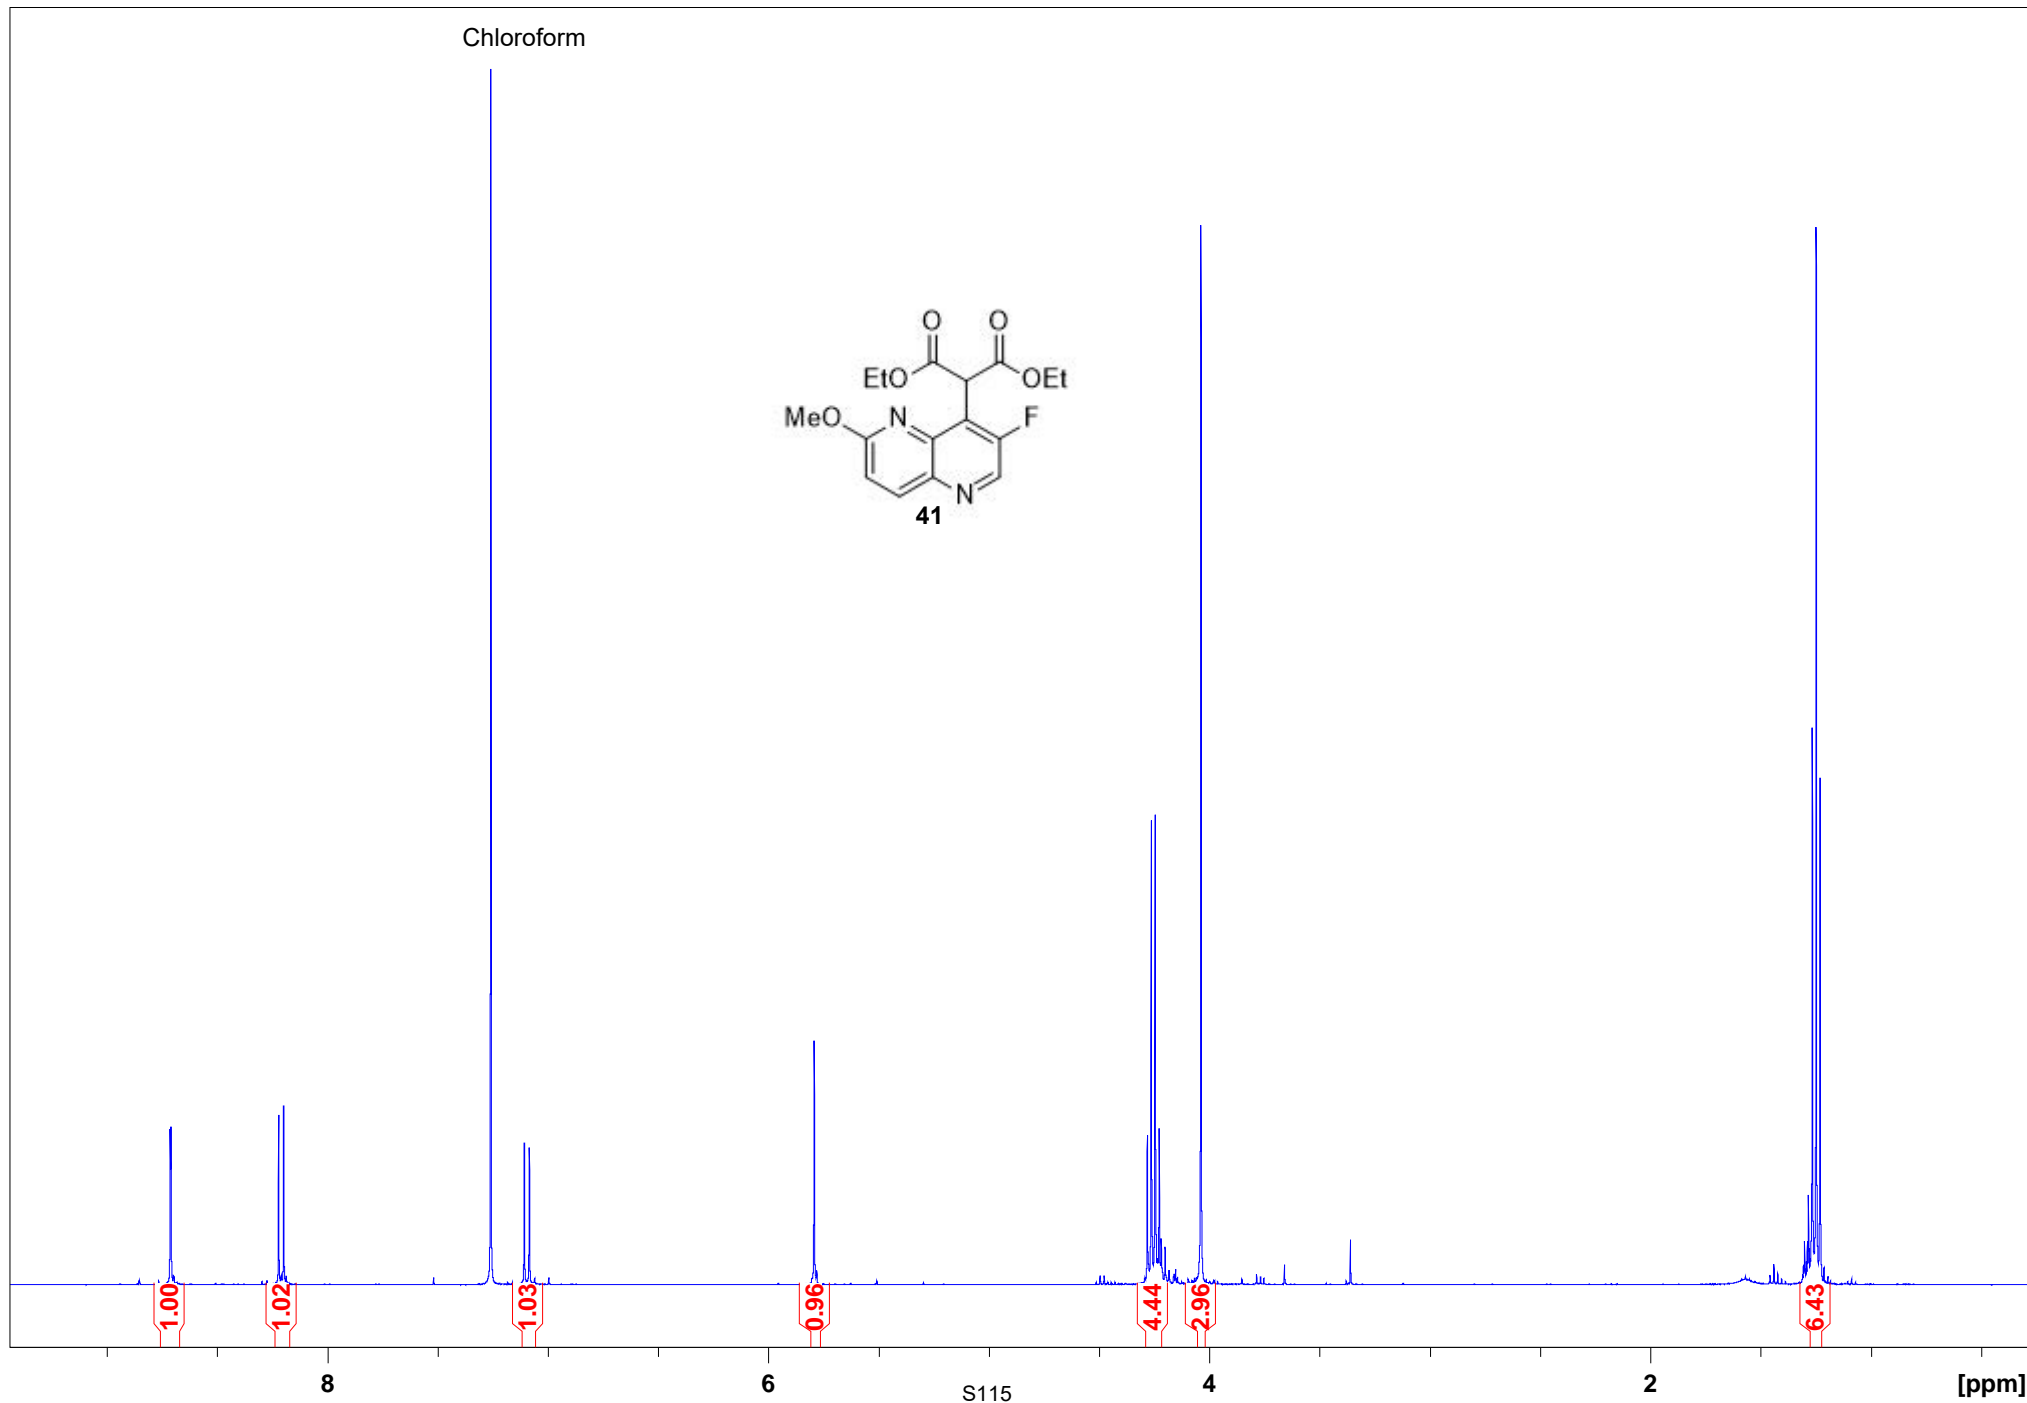

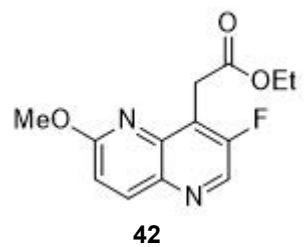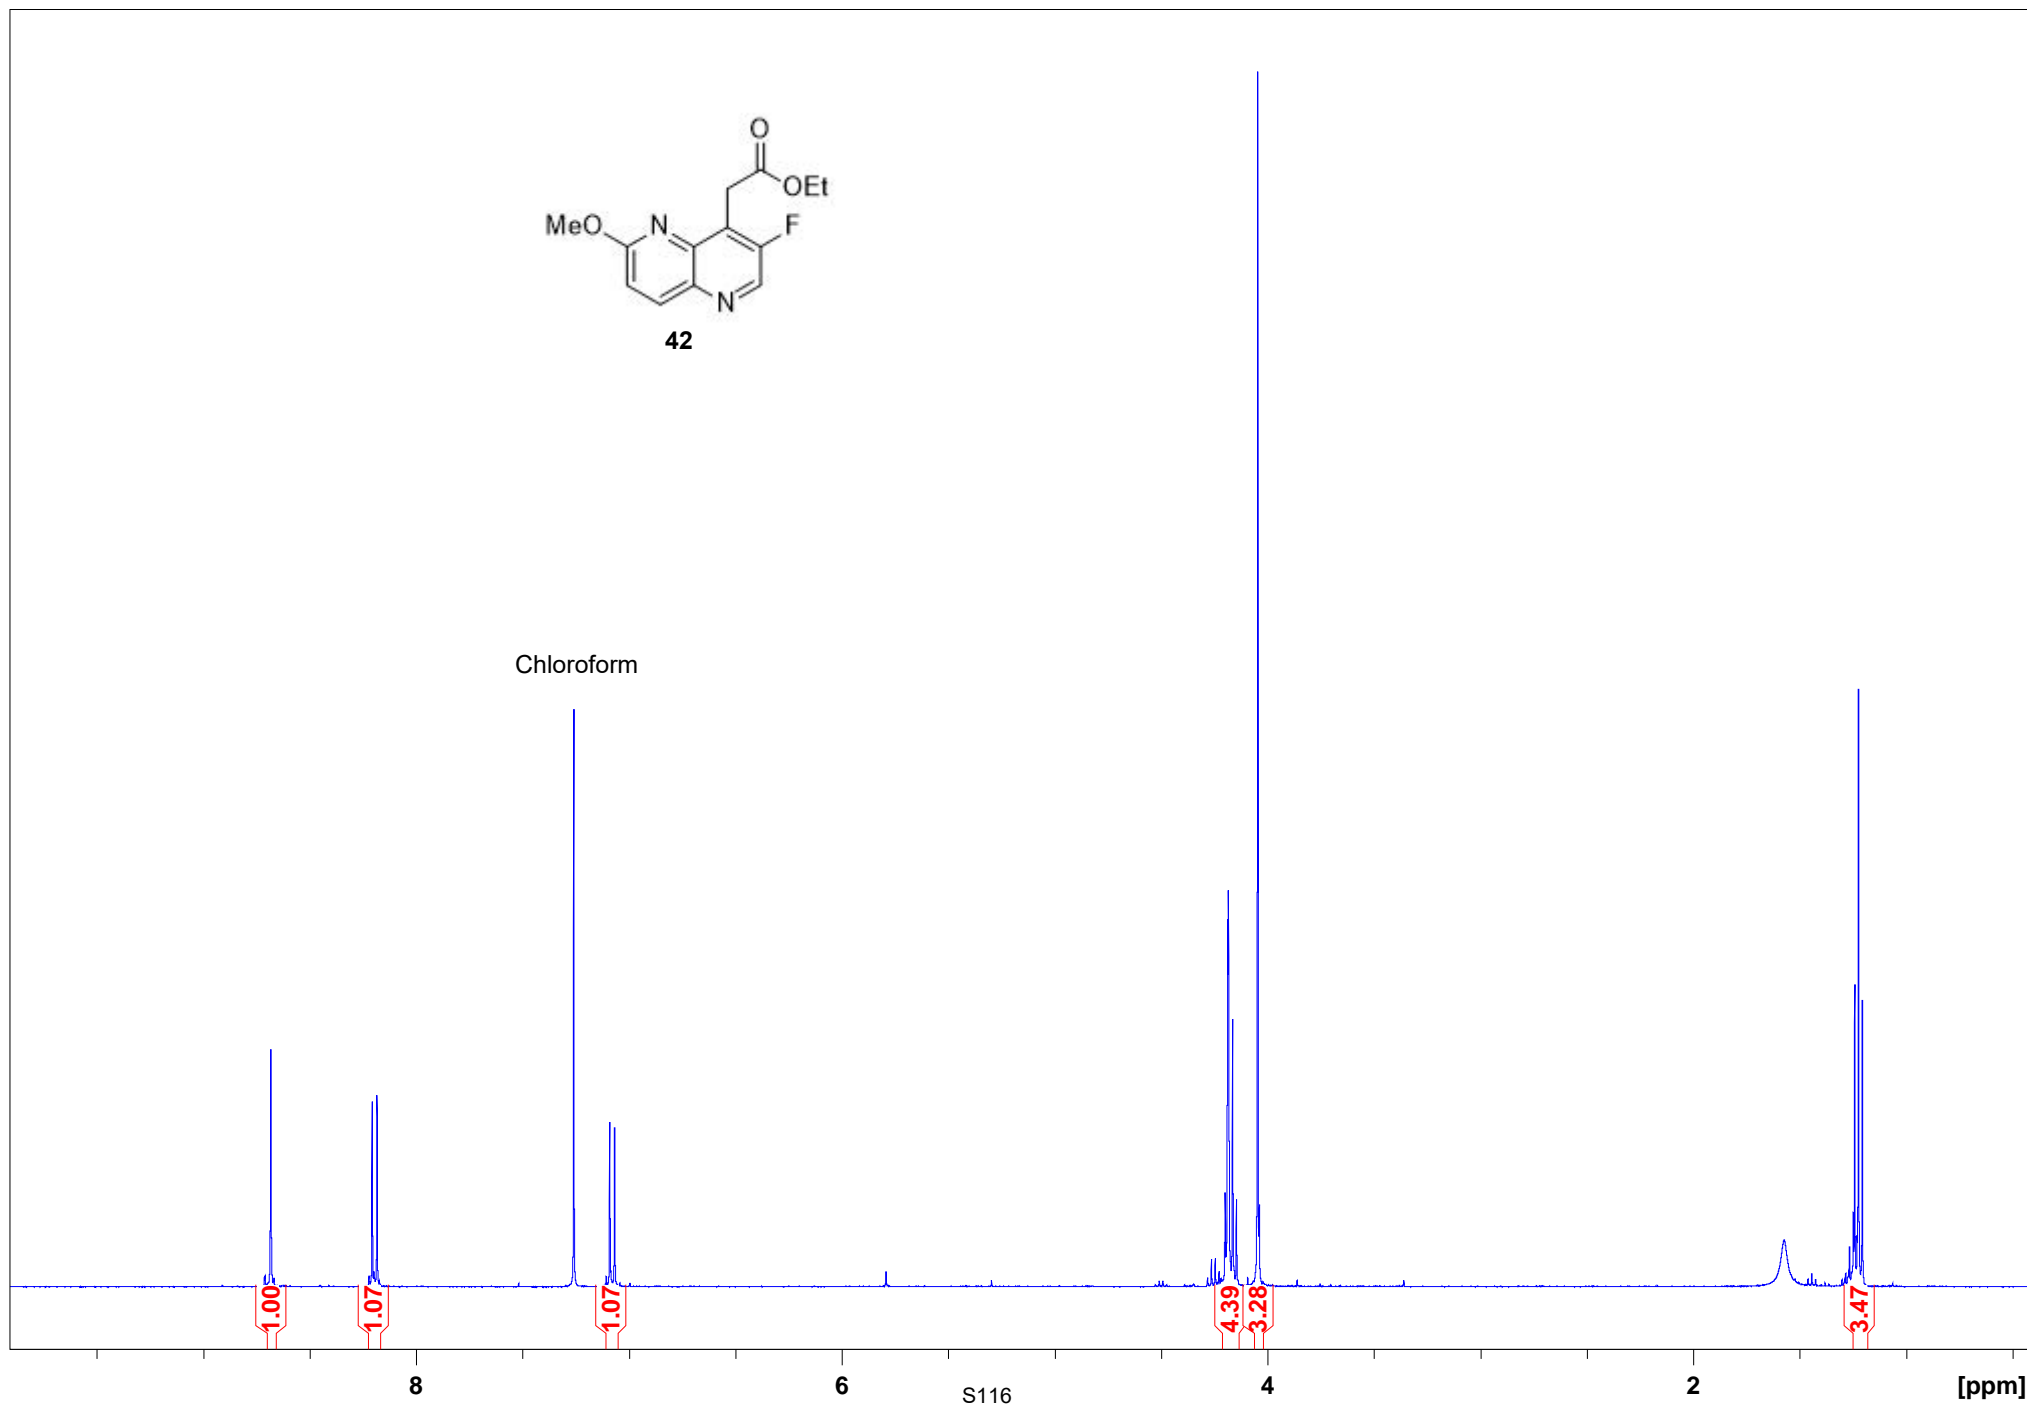

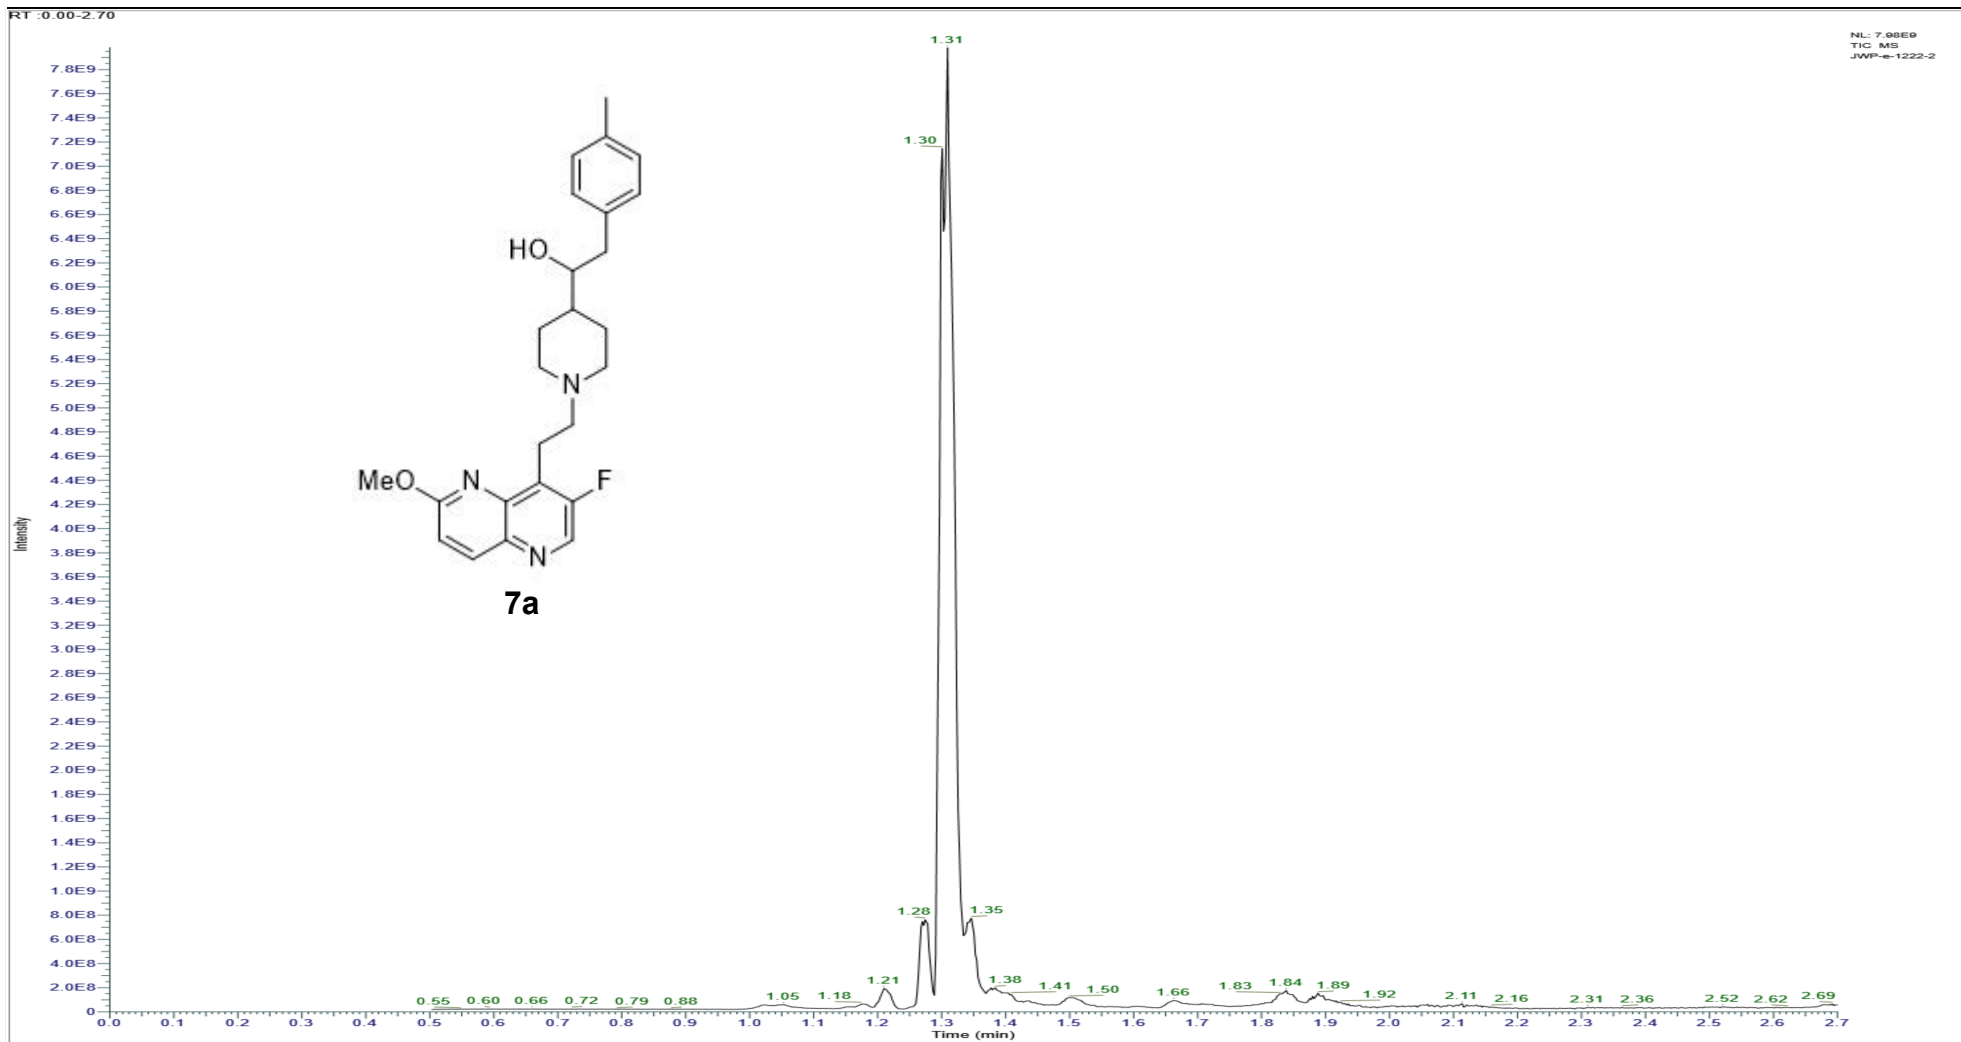

JWP-e-1222-2 #342 RT: 1.31 AV: 1 NL: 5.06E9  
T: FTMS + p ESI Full ms [200.0000-1500.0000] TIC: 7263578100.00000  
BPI: 5199437312.00000 BPM: 424.23824 IIT (ms): 0.09100

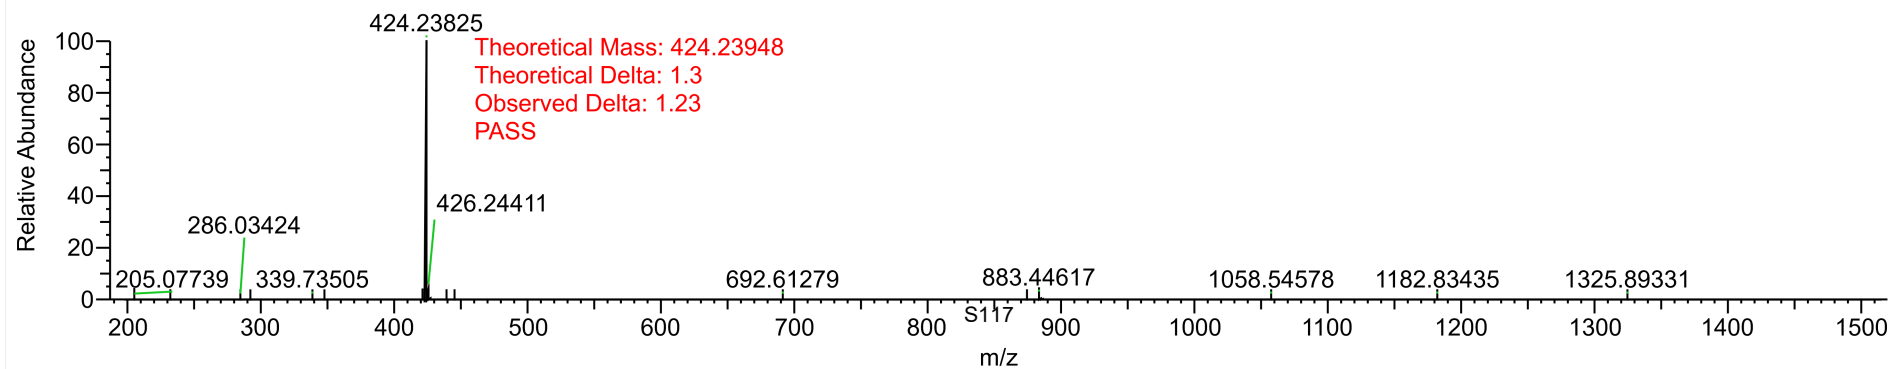

Openlynx Report -

Vial:1:4  
 Date:09-Dec-2023  
 Method:C:\MassLynx\OpenLynx\_Methods\Mitton-Fry\_10min\_150-600\_Test01.olp  
 MS Method:10\_min\_150-600

ID:  
 Time:13:30:14  
 Inlet Method:10\_min\_150-600

File:JWP-e-1222-2  
 Description:JWP-e-1222-2  
 Instrument:ACQ-QDA#KBD6021  
 Detectors:Waters Acquity PDA

Printed: Sat Dec 09 13:42:31 2023

Sample Report (continued):

9 3.76  
 10 3.89

2: UV Detector: 324 Nm

6.382e-2  
 Range: 6.547e-2

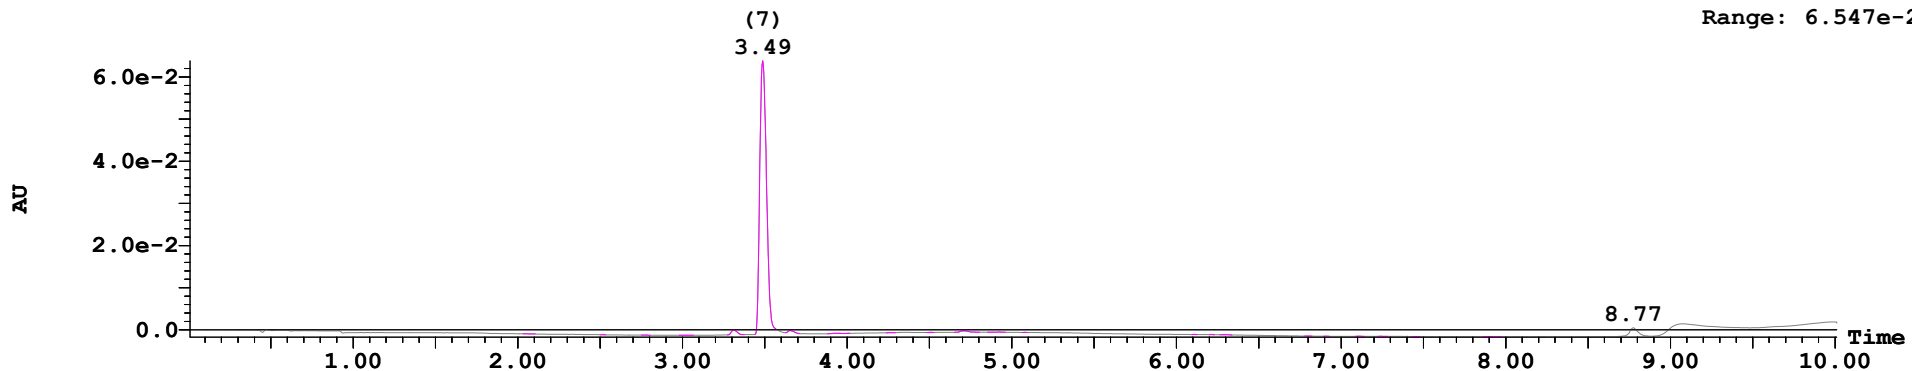

| Peak Number | Time | AreaAbs | Area %Total |
|-------------|------|---------|-------------|
| 1           | 2.03 | 6e-001  | 0.02        |
| 2           | 2.51 | 2e-001  | 0.01        |
| 3           | 2.77 | 5e-001  | 0.02        |
| 5           | 3.03 | 8e-001  | 0.02        |
| 6           | 3.31 | 5e+001  | 1.50        |
| 7           | 3.49 | 3e+003  | 96.60       |
| 8           | 3.65 | 2e+001  | 0.80        |
| 11          | 3.93 | 3e+000  | 0.11        |
| 12          | 4.29 | 5e-001  | 0.02        |
| 13          | 4.51 | 5e-001  | 0.02        |
| 14          | 4.71 | 2e+001  | 0.61        |
| 15          | 4.88 | 6e-001  | 0.02        |
| 16          | 4.92 | 1e+000  | 0.05        |
| 17          | 5.08 | 3e-001  | 0.01        |
| 18          | 6.11 | 2e-001  | 0.01        |
| 19          | 6.21 | 2e-001  | 0.01        |
| 20          | 6.28 | 1e+000  | 0.04        |
| 21          | 6.80 | 3e-001  | 0.01        |
| 22          | 6.91 | 3e-001  | 0.01        |
| 23          | 7.11 | 9e-001  | 0.03        |
| 24          | 7.24 | 7e-001  | 0.02        |
| 25          | 7.46 | 6e-001  | 0.02        |
| 26          | 7.88 | 1e+000  | 0.04        |

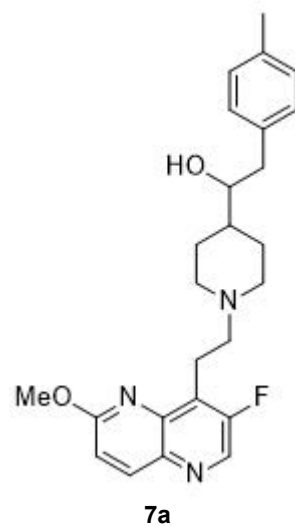

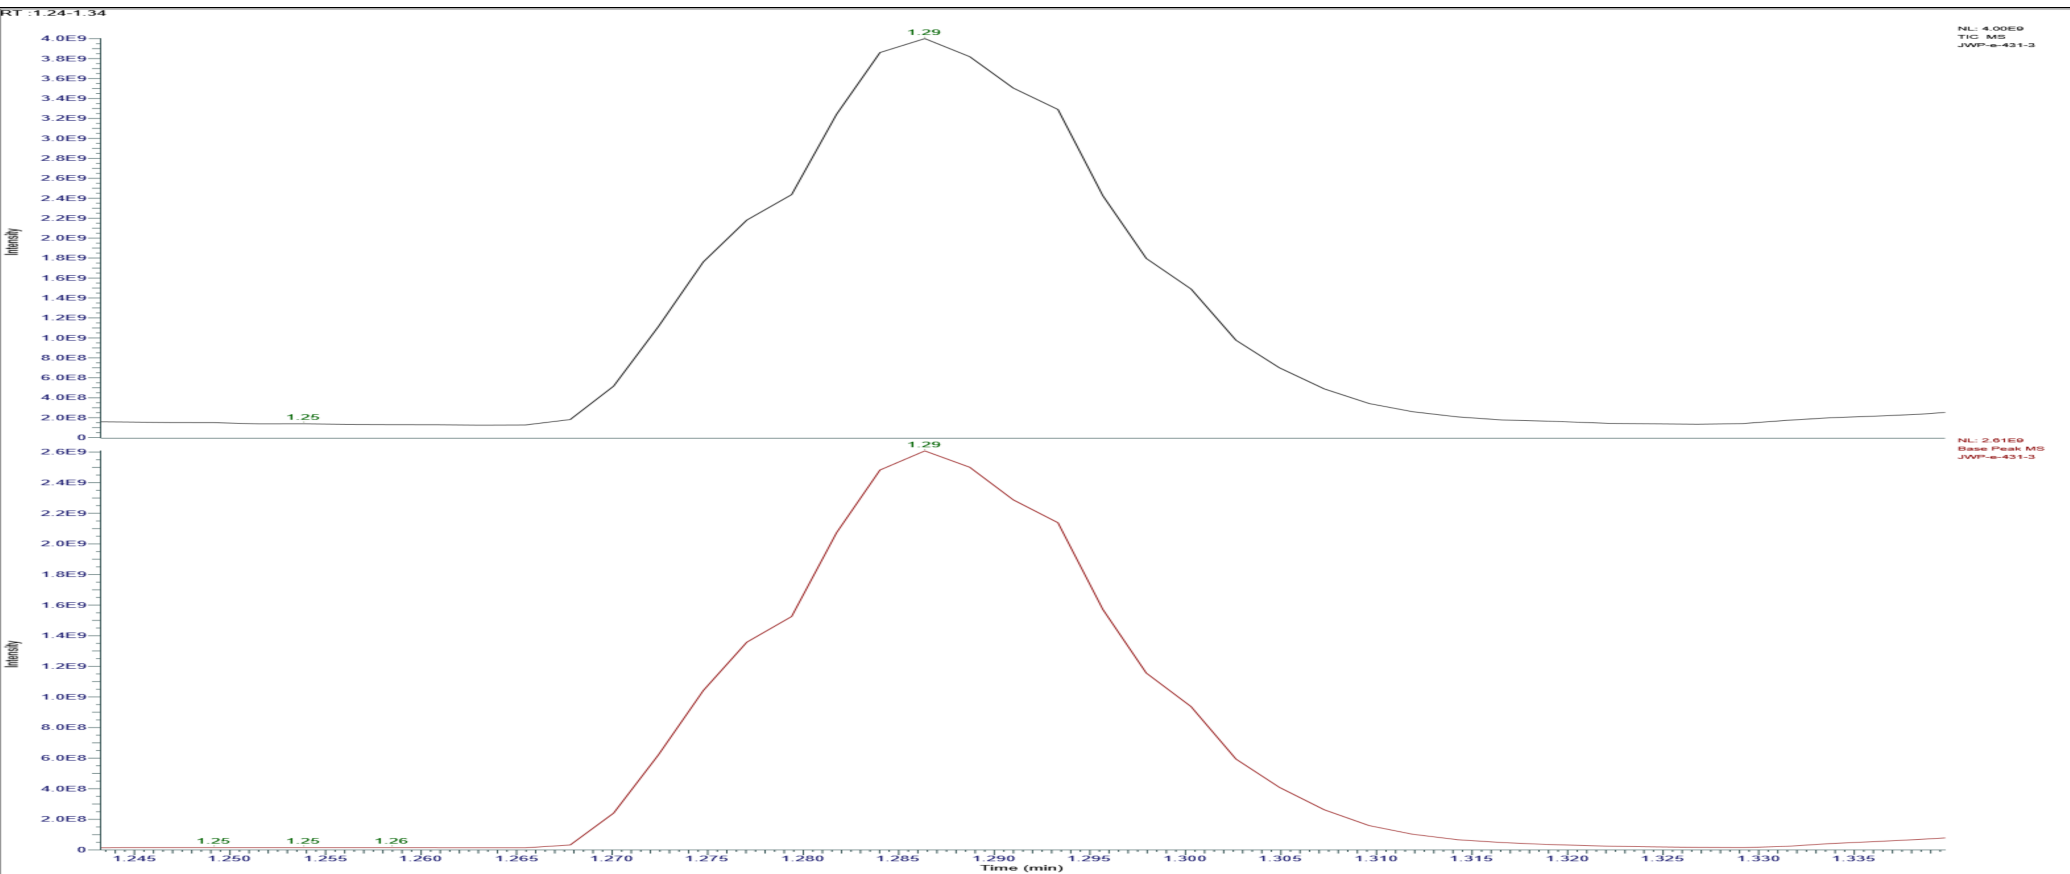

JWP-e-431-3 #343 RT: 1.29 AV: 1 NL: 2.56E9  
 T: FTMS + p ESI Full ms [200.0000-1500.0000] TIC: 4001273600.00000  
 BPI: 2608272128.00000 BPM: 423.25473 IIT (ms): 0.27700

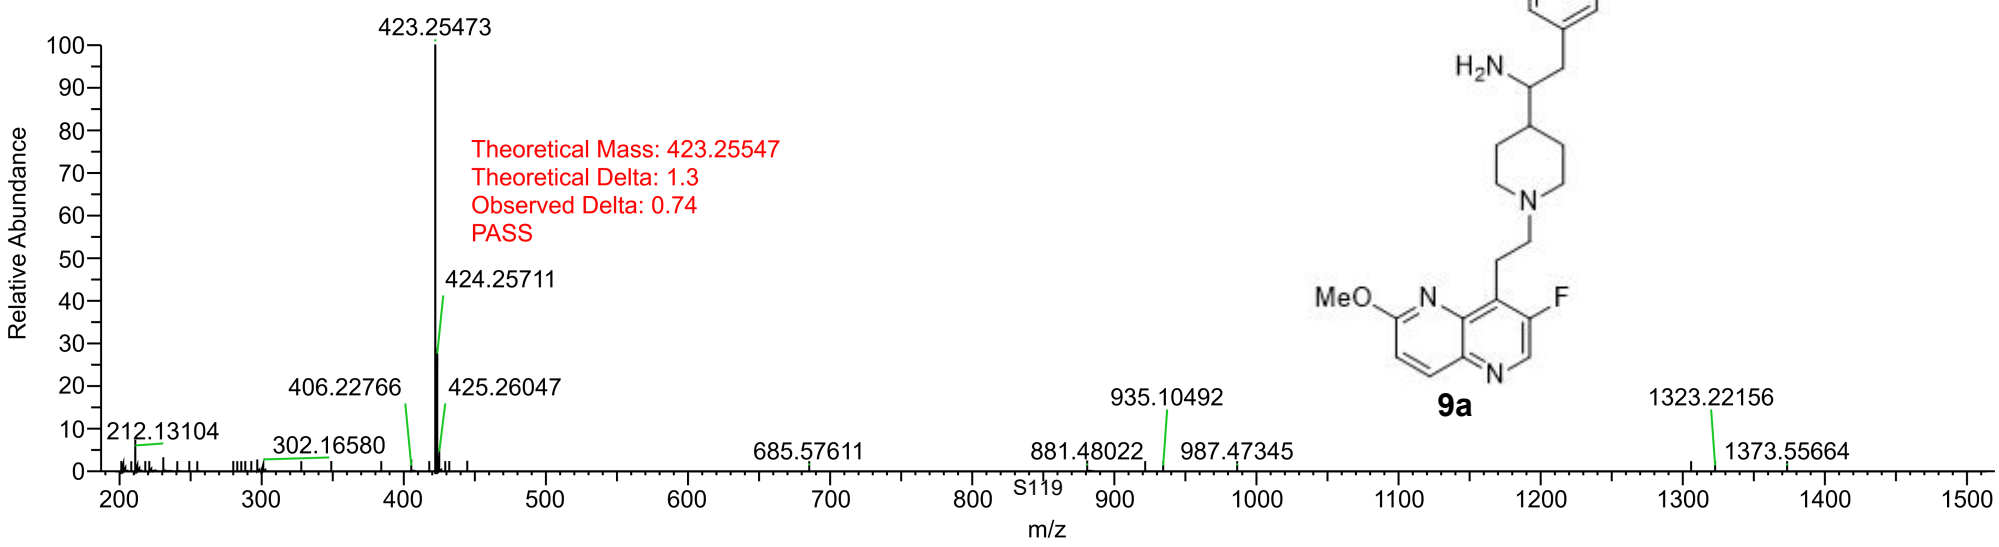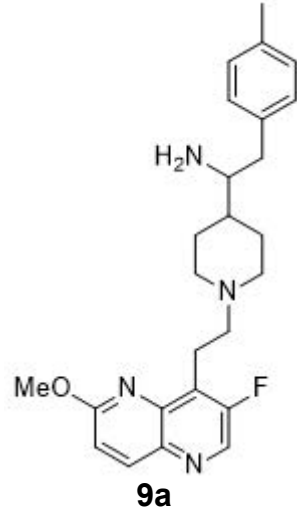

## SAMPLE INFORMATION

|                   |                           |                     |                            |
|-------------------|---------------------------|---------------------|----------------------------|
| Sample Name:      | JWP-e-431-3               | Acquired By:        | Developer                  |
| Sample Type:      | Unknown                   | Sample Set Name:    | default                    |
| Vial:             | 2:F,2                     | Acq. Method Set:    | PDA_QDA_Def                |
| Injection #:      | 1                         | Processing Method:  | PDA_PM_Def                 |
| Injection Volume: | 2.00 ul                   | Channel Name:       | 323.9                      |
| Run Time:         | 8.0 Minutes               | Proc. Chnl. Descr.: | PDA Spectrum PDA 323.9 nm, |
| Date Acquired:    | 8/31/2022 11:22:30 AM EDT |                     |                            |
| Date Processed:   | 8/31/2022 1:36:06 PM EDT  |                     |                            |

## Auto-Scaled Chromatogram

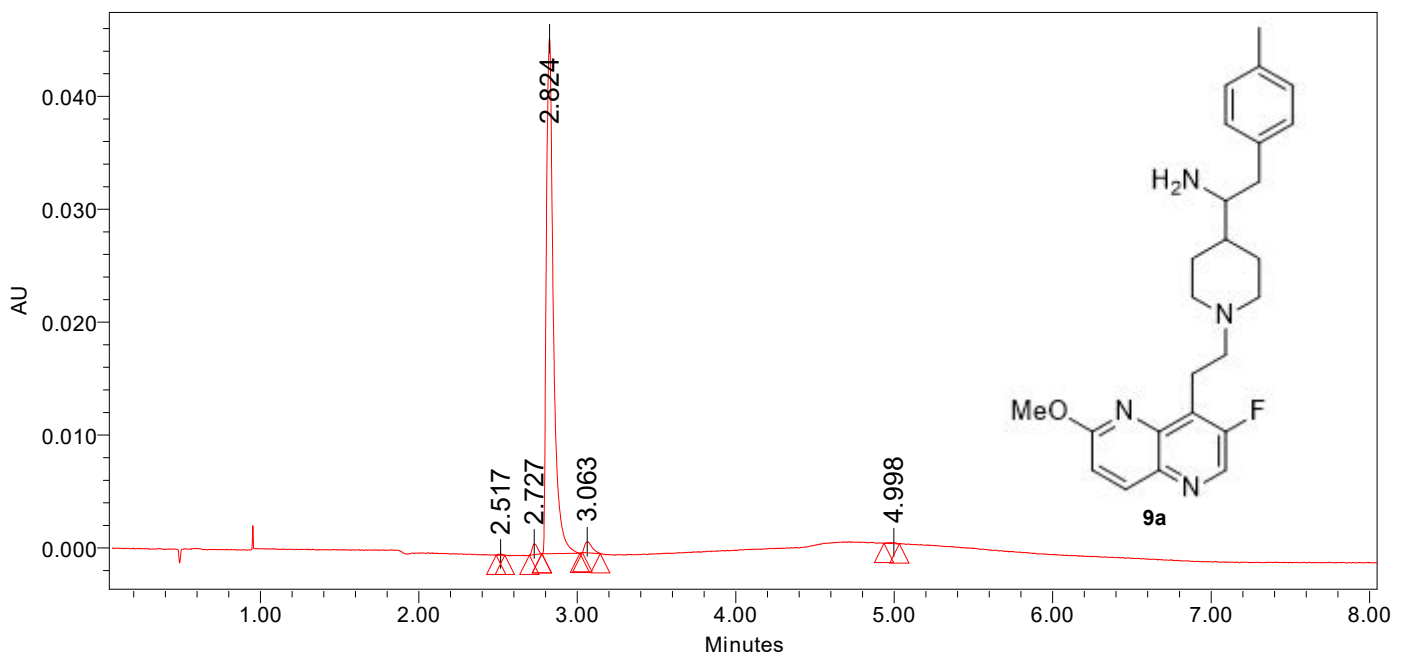

## Peak Results

|   | RT    | % Area |
|---|-------|--------|
| 1 | 2.517 | 0.1    |
| 2 | 2.727 | 1.5    |
| 3 | 2.824 | 95.9   |
| 4 | 3.063 | 2.2    |
| 5 | 4.998 | 0.2    |



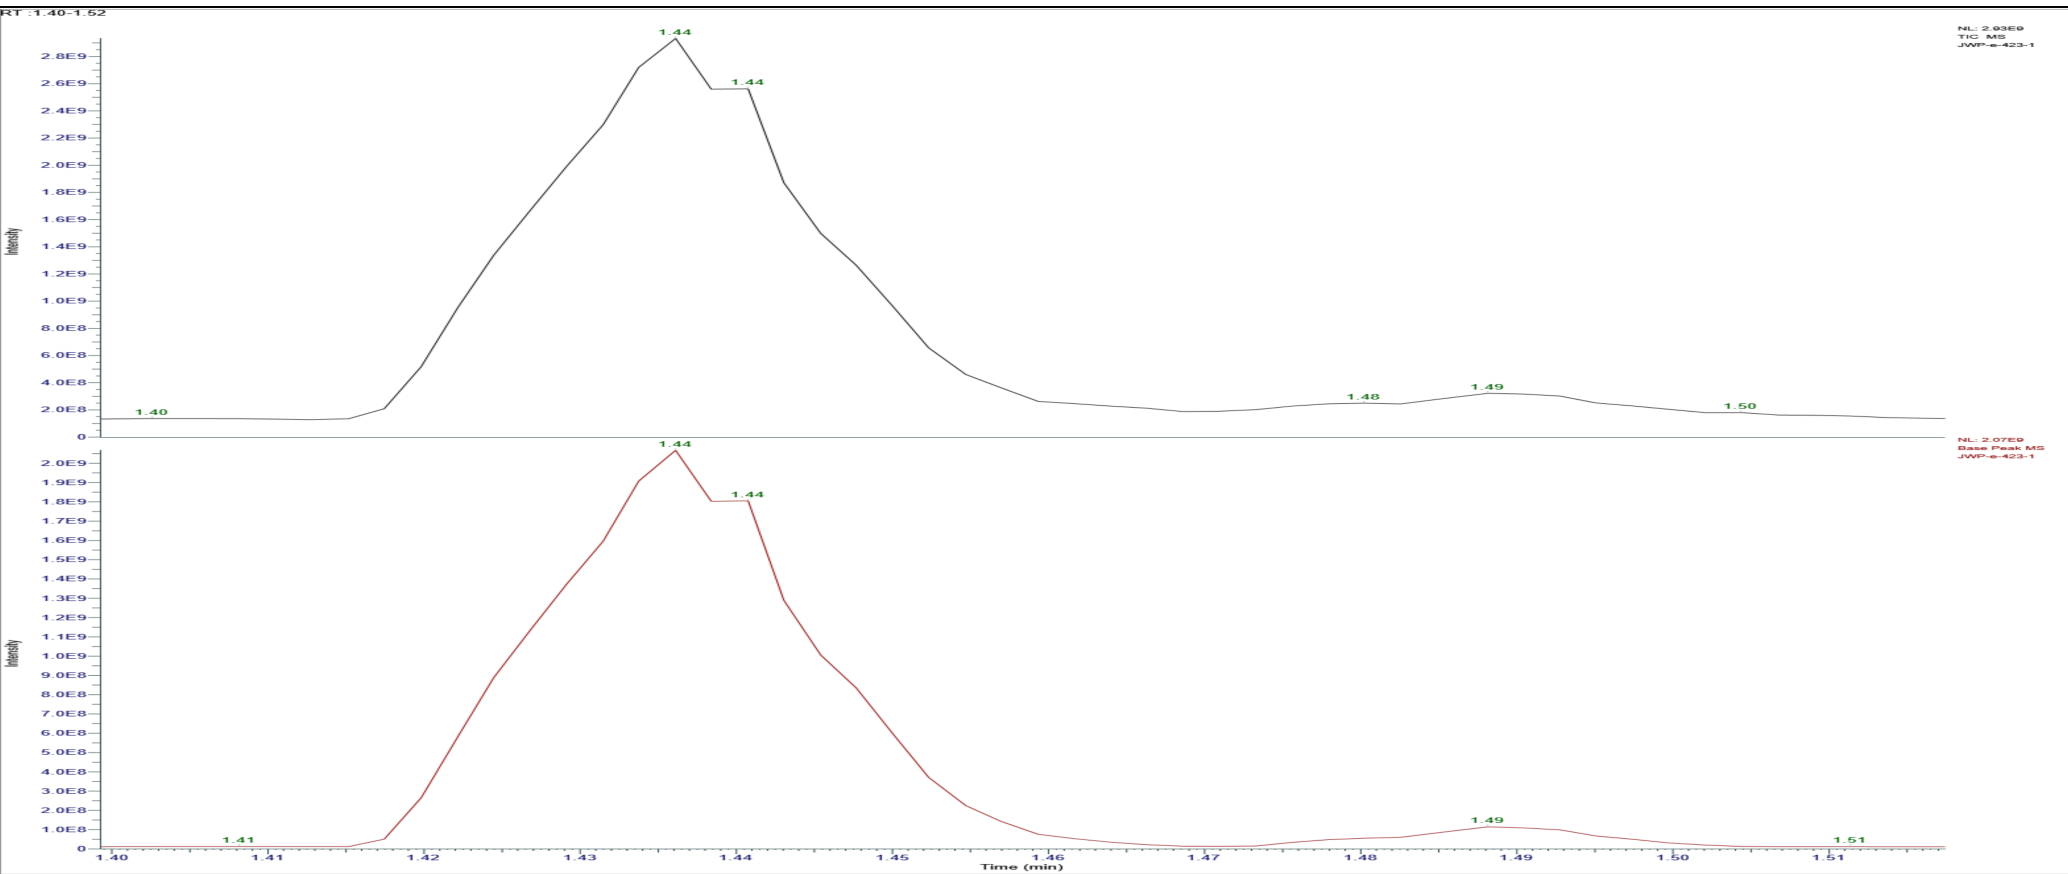

JWP-e-423-1 #407 RT: 1.44 AV: 1 NL: 2.02E9  
 T: FTMS + p ESI Full ms [200.0000-1500.0000] TIC: 2933029900.00000  
 BPI: 2067483008.00000 BPM: 440.23388 IIT (ms): 0.31300

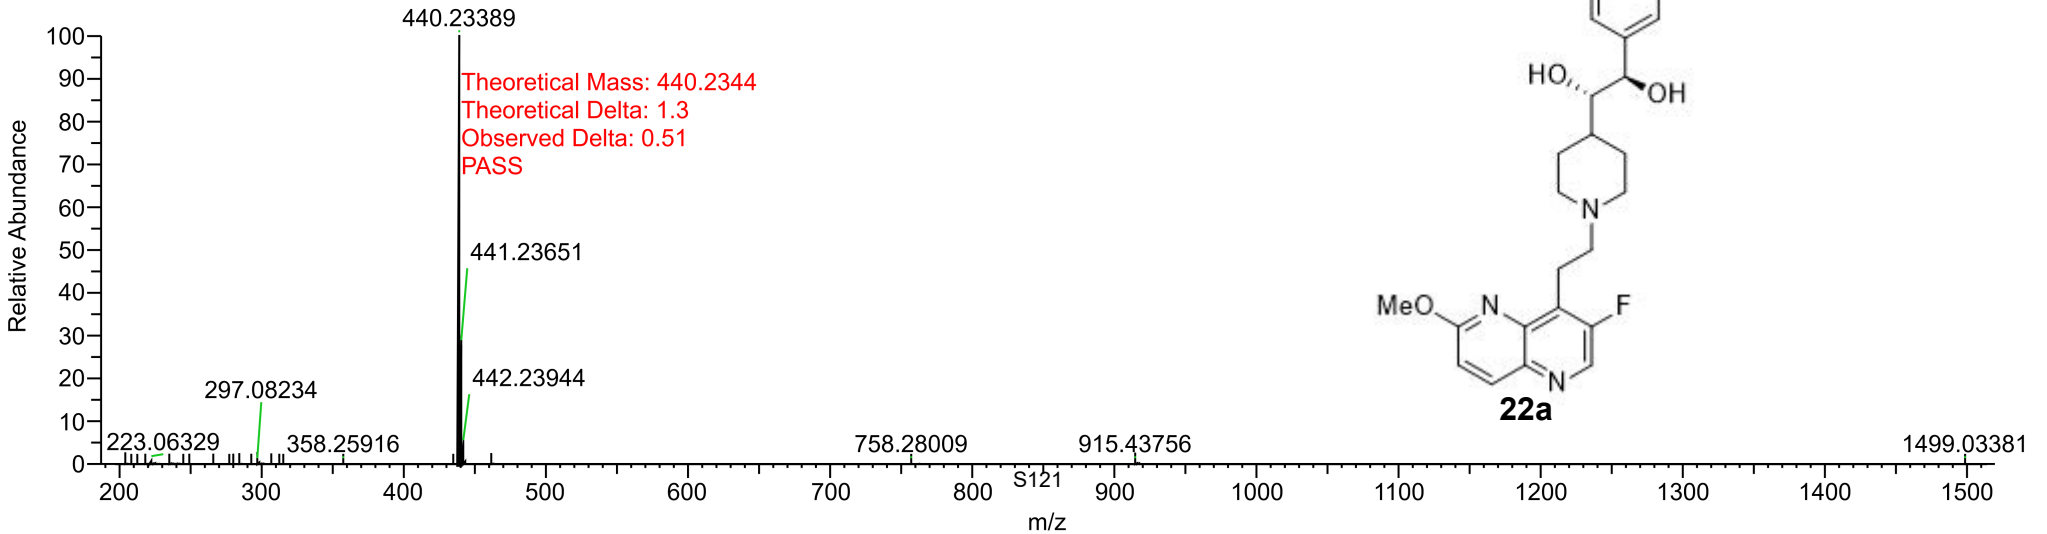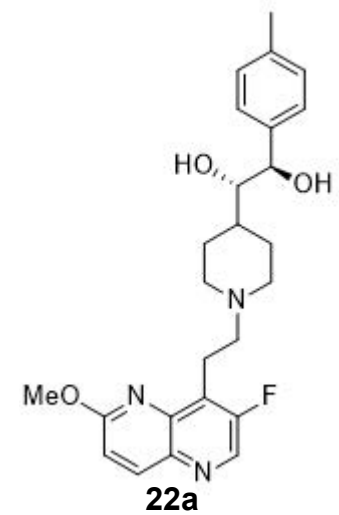

SAMPLE INFORMATION

|                   |                          |                     |                            |
|-------------------|--------------------------|---------------------|----------------------------|
| Sample Name:      | JWP-e-423-1              | Acquired By:        | Developer                  |
| Sample Type:      | Unknown                  | Sample Set Name:    | dfeault                    |
| Vial:             | 2:F,2                    | Acq. Method Set:    | PDA_QDA_Def                |
| Injection #:      | 1                        | Processing Method:  | PDA_PM_Def                 |
| Injection Volume: | 2.00 ul                  | Channel Name:       | 323.9                      |
| Run Time:         | 8.0 Minutes              | Proc. Chnl. Descr.: | PDA Spectrum PDA 323.9 nm, |
| Date Acquired:    | 8/31/2022 3:37:07 PM EDT |                     |                            |
| Date Processed:   | 8/31/2022 5:21:12 PM EDT |                     |                            |

Auto-Scaled Chromatogram

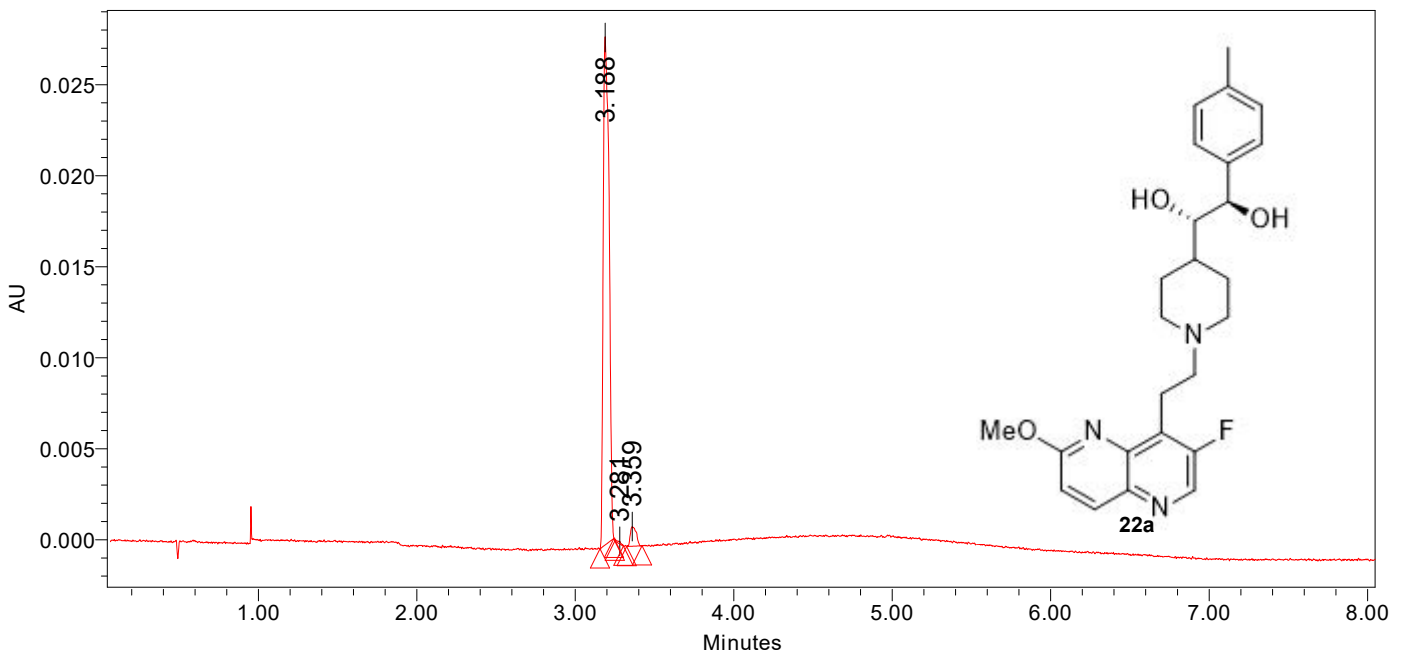

Peak Results

|   | RT    | % Area |
|---|-------|--------|
| 1 | 3.188 | 95.9   |
| 2 | 3.281 | 0.4    |
| 3 | 3.359 | 3.8    |

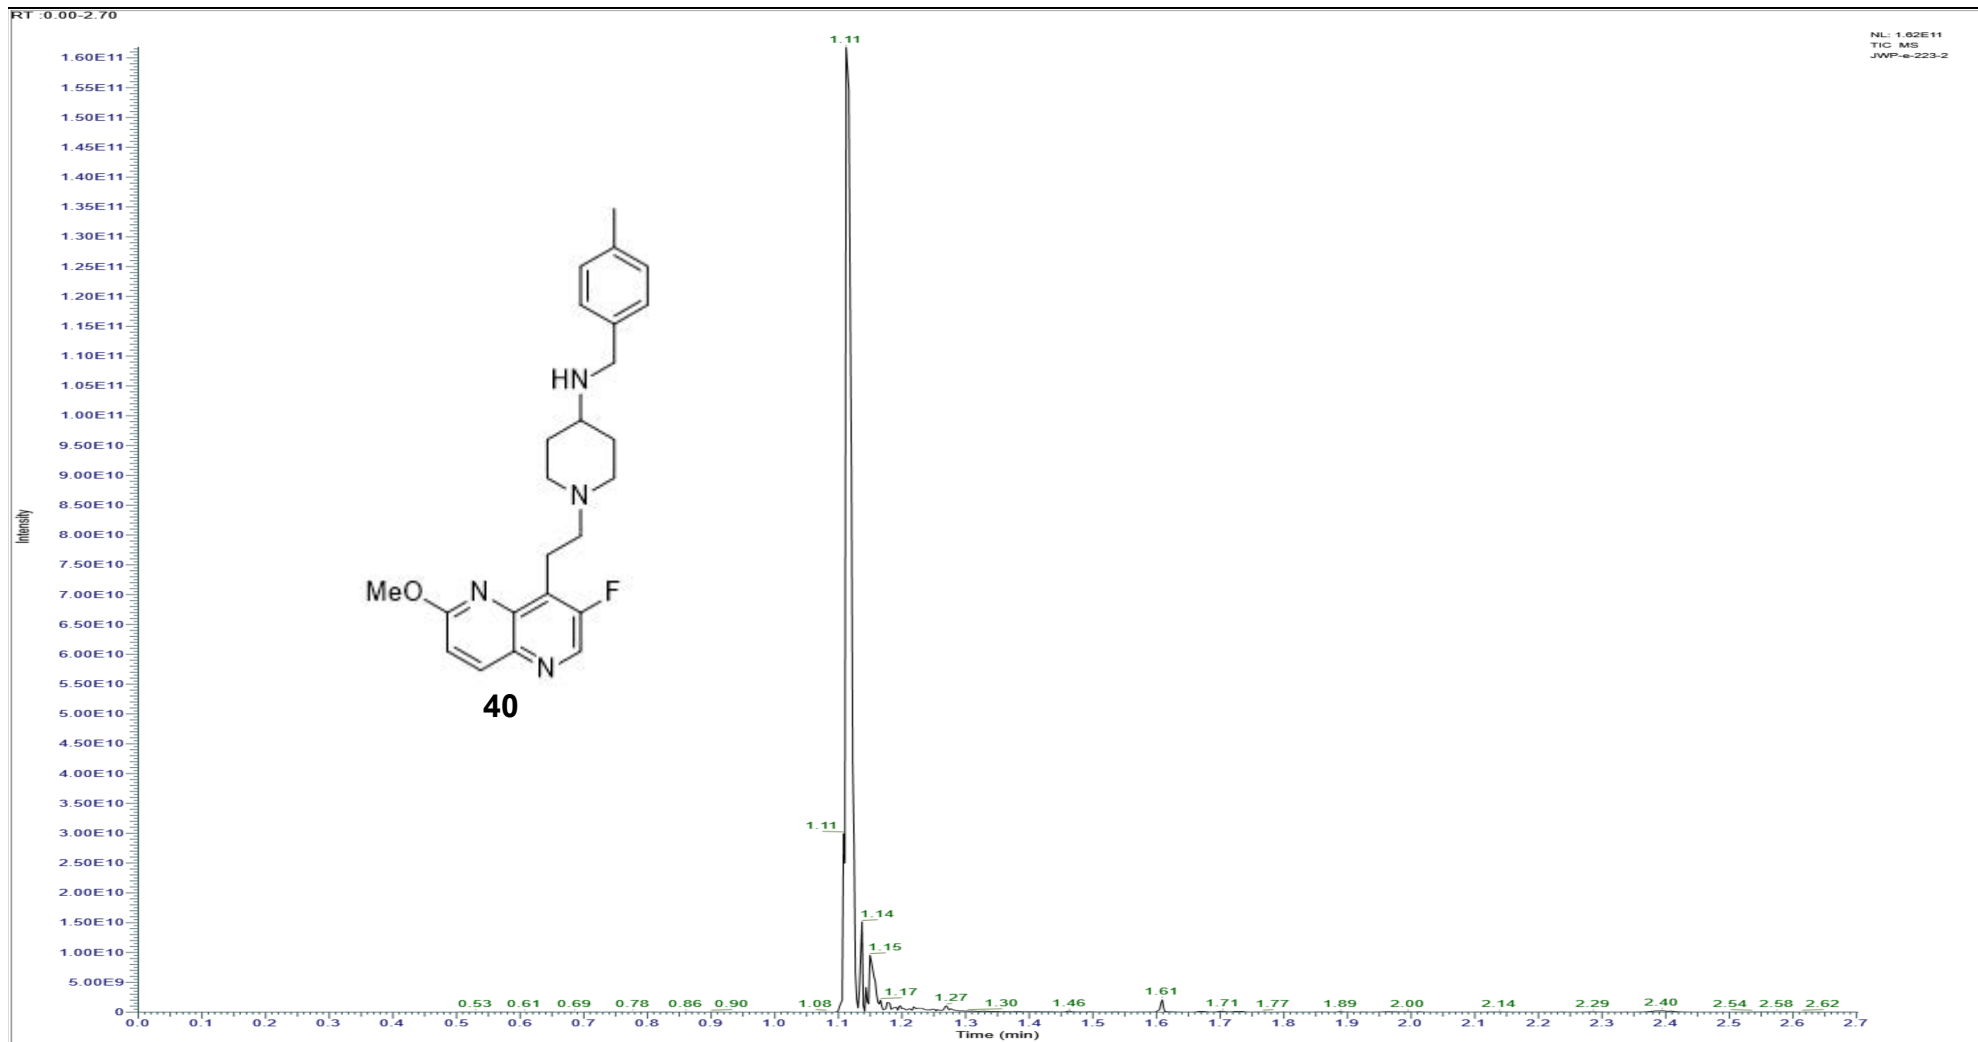

JWP-e-223-2 #267 RT: 1.14 AV: 1 NL: 1.02E8  
T: FTMS + p ESI Full ms [200.0000-1500.0000] TIC: 150367630.00000  
BPI: 102735800.00000 BPM: 409.23936 IIT (ms): 0.16200

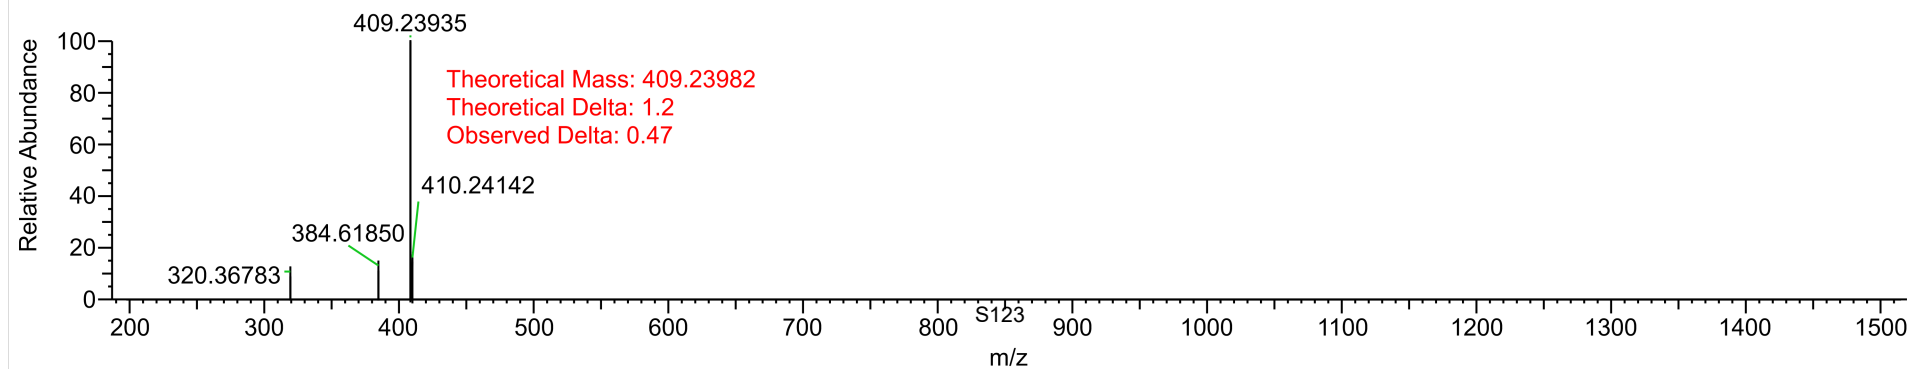

# SAMPLE INFORMATION

Acquired at OSU College of Pharmacy Shared Instrumentation Lab R151

Sample Name: JWP-e-223-2

Sample Type: Unknown

Vial: 1:A,2

Injection #: 1

Injection Volume: 2.00 ul

Sample Set Name: default

Acquired By: Developer

Date Acquired: 7/27/2023 11:02:05 AM EDT

Acq. Method Set: PDA\_QDA\_Def

Date Processed: 7/27/2023 4:15:59 PM EDT

Processing Method: PDA\_PM\_Def

Channel Name: 323.9nm

Proc. Chnl. Descr.: PDA Spectrum PDA 323.9 nm, Time offset by 0.046

## Auto-Scaled Chromatogram

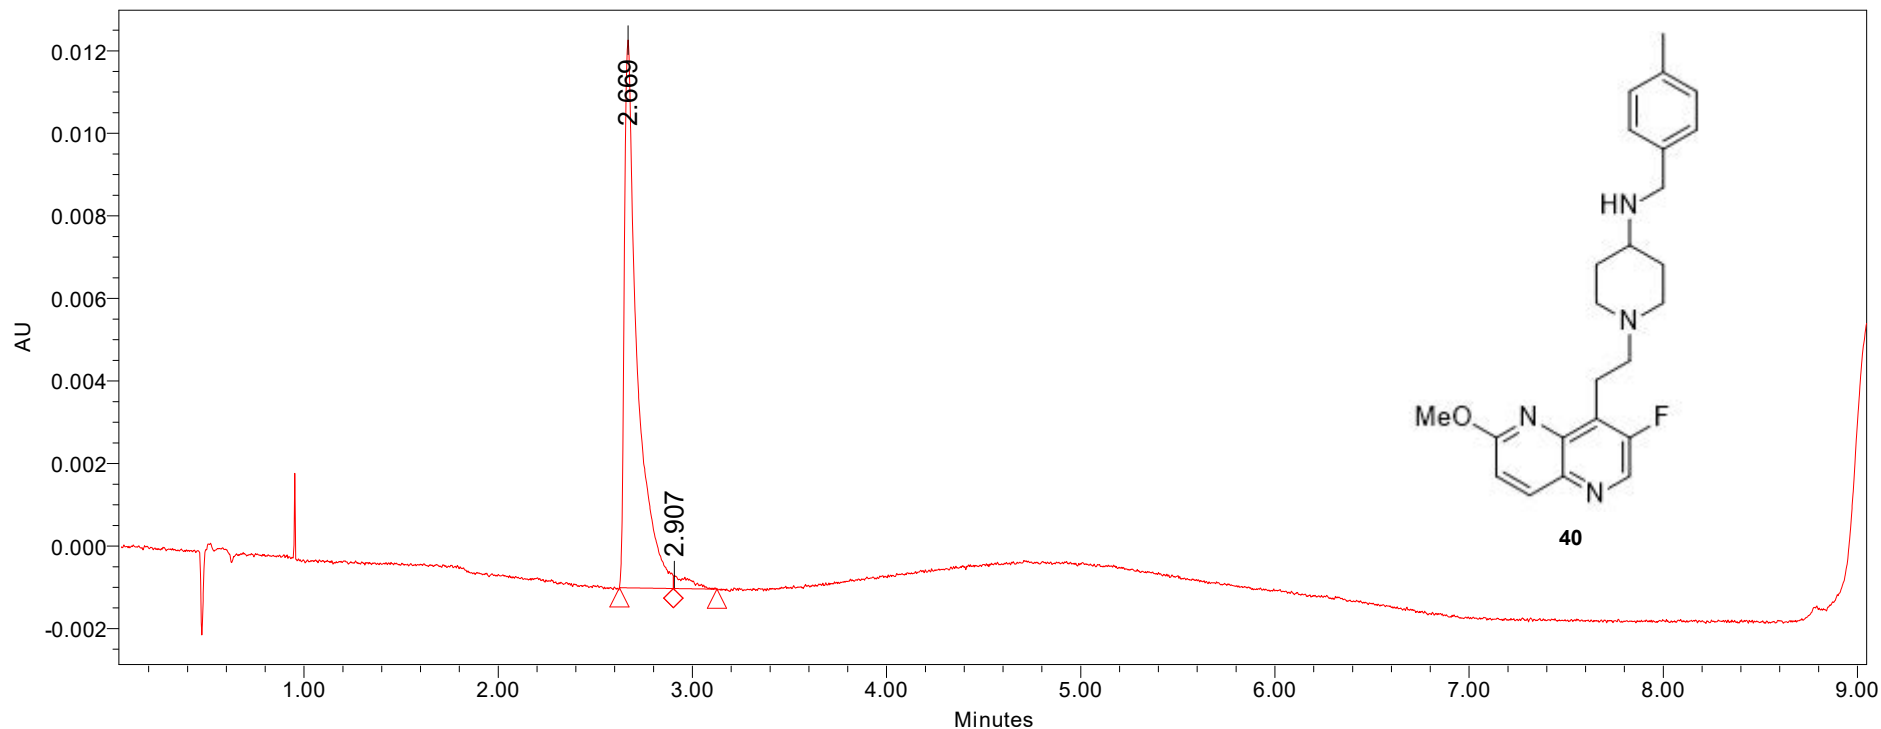

PDA Result Table

| Name | RT    | % Area |
|------|-------|--------|
| 1    | 2.669 | 97.02  |
| 2    | 2.907 | 2.98   |

=====  
Acq. Operator : SYSTEM  
Sample Operator : SYSTEM  
Acq. Instrument : OSU\_Rm331-ELSD Location : 1  
Injection Date : 12/21/2023 1:47:19 PM  
Inj Volume : Manually  
Acq. Method : C:\Chem32\1\Methods\Hex-EtOH-6040\_Isocratic.M  
Last changed : 12/21/2023 1:45:10 PM by SYSTEM  
(modified after loading)  
Analysis Method : C:\Chem32\1\Methods\Hex-EtOH-6040\_Isocratic.M  
Last changed : 12/21/2023 4:45:38 PM by SYSTEM  
Sample Info : OSUAB-0309-01  
method 99 hex. 1 RA.

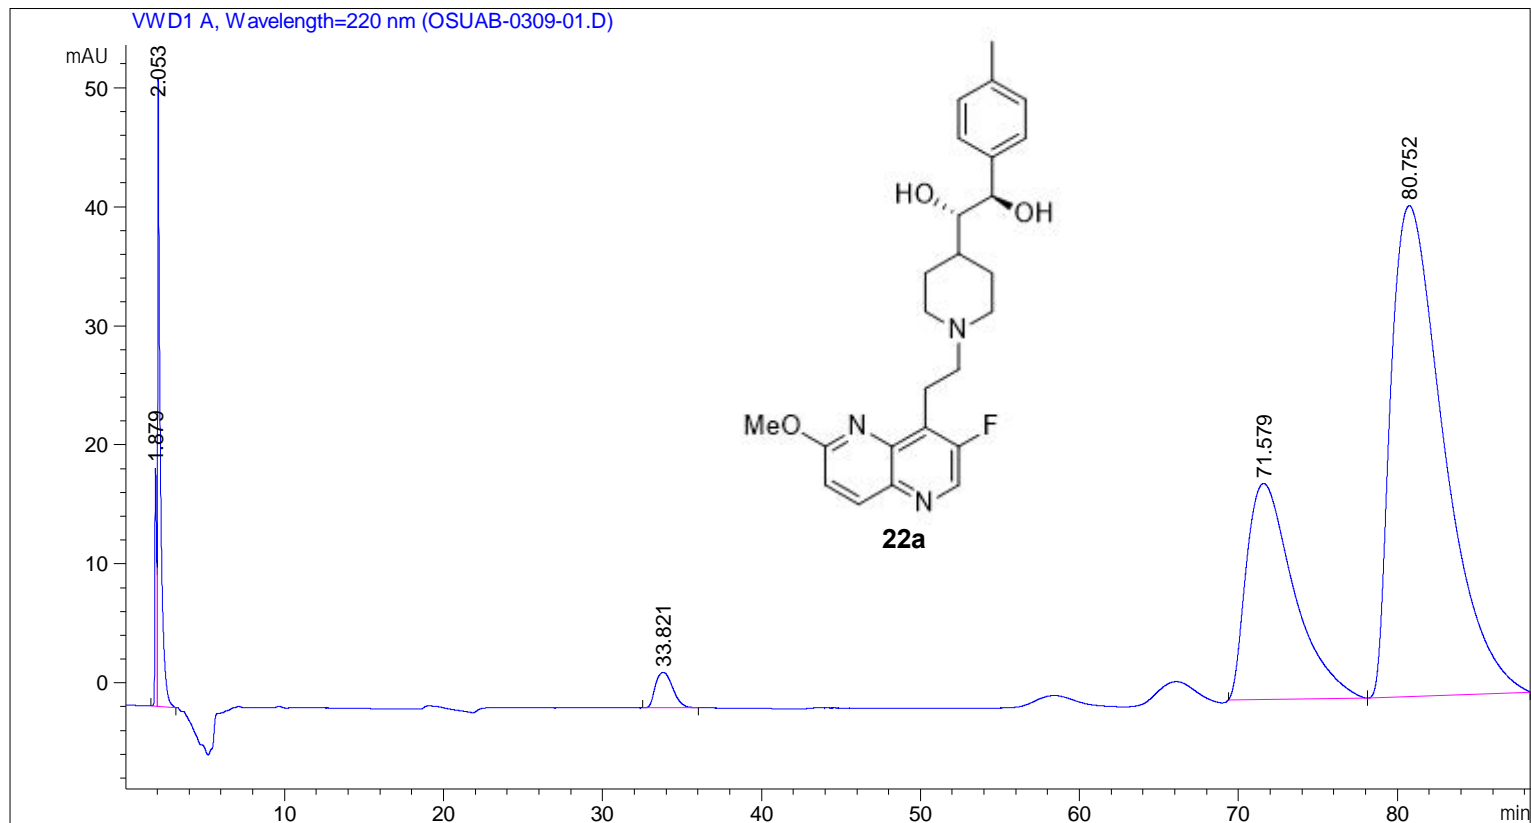

=====  
Area Percent Report  
=====

Sorted By : Signal  
Multiplier : 1.0000  
Dilution : 1.0000  
Do not use Multiplier & Dilution Factor with ISTDs

Signal 1: VWD1 A, Wavelength=220 nm

| Peak # | RetTime [min] | Type | Width [min] | Area [mAU*s] | Height [mAU] | Area %  |
|--------|---------------|------|-------------|--------------|--------------|---------|
| 1      | 1.879         | BV   | 0.1148      | 154.00912    | 20.00095     | 1.0749  |
| 2      | 2.053         | VB   | 0.1474      | 603.60779    | 52.80570     | 4.2130  |
| 3      | 33.821        | BB   | 0.9038      | 226.58345    | 2.97755      | 1.5815  |
| 4      | 71.579        | BB   | 2.5643      | 3778.73071   | 18.16215     | 26.3743 |

S125

Sample Name: OSUAB-0309-01

| Peak # | RetTime [min] | Type | Width [min] | Area [mAU*s] | Height [mAU] | Area %  |
|--------|---------------|------|-------------|--------------|--------------|---------|
| 5      | 80.752        | BBA  | 2.9484      | 9564.38672   | 41.25961     | 66.7563 |

Totals : 1.43273e4 135.20596

=====  
\*\*\* End of Report \*\*\*
